# Supplementary material for: Genome-wide analysis of blood lipid metabolites in over 5000 South Asians reveals biological insights at cardiometabolic disease loci
Source: Springer Nature journal article supplement (doi:10.1186/s12916-021-02087-1), 2021-09-09

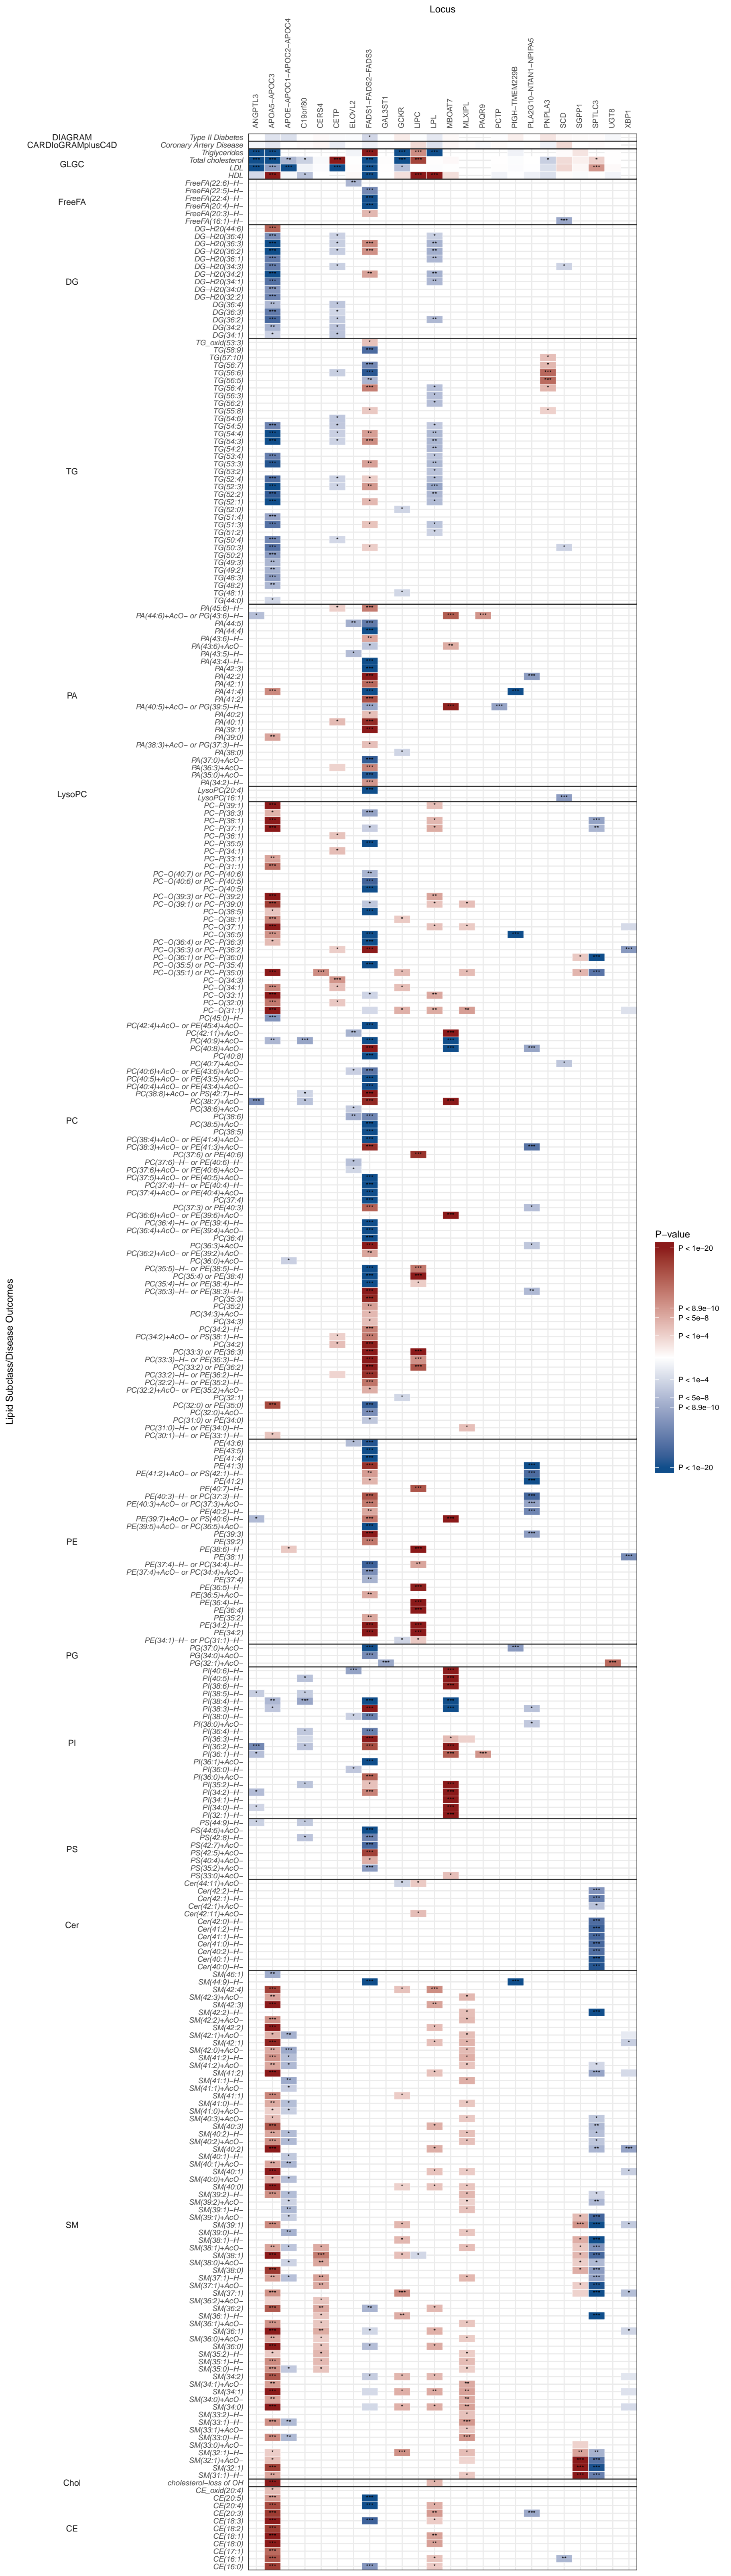

Supplement: MOESM3 [file 19652254]
