# Supplementary material for: Genome-wide analysis of blood lipid metabolites in over 5000 South Asians reveals biological insights at cardiometabolic disease loci
Source: BMC Med. 2021 Sep 10;19:232. doi: 10.1186/s12916-021-02087-1 (PMC8431908; doi:10.1186/s12916-021-02087-1)
Supplement: Supplementary file 2 — Additional file 2. Supplementary Tables 1-18. [file 12916_2021_2087_MOESM2_ESM.xlsx]

## Sheet: Legend
Genome-wide analysis of blood lipid metabolites in over 5000 South Asians reveals biological insights at cardiometabolic disease loci
Supplementary Tables
Table S1. Lipids measured in PROMIS. Abbreviations: m/z = Mass-to-charge ratio.
Table S2. Lipids measured in INTERVAL. Abbreviations: m/z = Mass-to-charge ratio.
Table S3. Number of significant variants and loci associated with each lipid subclass.
Table S4. Summary of significant associations between lipid metabolites and genetic variants from univariate genome-wide association study in PROMIS (P < 8.93 x 10-10). Abbreviations: m/z = Mass-to-charge ratio; SE = Standard Error. Locus names are based on predicted causal gene(s) from functional annotation (see Supplementary Table 7).
Table S5. Summary of significant associations between lipid metabolites and genetic variants from conditional analyses of univariate genome-wide association study results in PROMIS (P < 8.93 x 10-10). Abbreviations: m/z = Mass-to-charge ratio; SE = Standard Error. Locus names are based on predicted causal gene(s) from functional annotation (see Supplementary Table 7).
Table S6. Summary of significant associations between lipid metabolites and genetic variants from univariate genome-wide association study in INTERVAL (P < 4.46 x 10-10). Abbreviations: m/z = Mass-to-charge ratio; SE = Standard Error. Locus names are based on predicted causal gene(s) from functional annotation (see Supplementary Table 14).
Table S7. Summary and classification of analysed ratios in PROMIS. Abbreviations: m/z = Mass-to-charge ratio. Numbered references refer to References for Supplementary Materials (see Additional File 1).
Table S8. Summary of significant associations between analysed ratios of lipid metabolites and genetic variants from univariate genome-wide association study in PROMIS (P < 5 x 10-8). Abbreviations: m/z = Mass-to-charge ratio; SE = Standard Error.
Table S9. Prediction of causal genes in PROMIS based on integration of information from bottom-up and top-down SNP annotation approaches Abbreviations: CE = Cholesterol ester; Cer = Ceramide; DG = Diacylglycerol; FA = Fatty acids; GL = Glycerolipid; GP = Glycerophospholipid; LPC = Lysophosphatidylcholine; PA = Phosphatidate; PC = Phosphatidylcholine; PE = Phosphatidylethanolamine; PG = Phosphatid…
Table S10. Annotation of genome-wide significant associations in PROMIS from the level of the variant (bottom-up). Abbreviations: eQTL = Expression Quantitative Trait Loci; LD = Linkage Disequilibrium. Proxy variants are defined as those with an r2 ≥ 0.8 with the corresponding lead variant.
Table S11. Annotation of genome-wide significant associations in PROMIS by proximal (±500-Kb from lead variant) gene function (top-down). Abbreviations: GO = Gene Ontology; KEGG = Kyoto Encyclopedia of Genes and Genomes; LIPID MAPS = Lipid Metabolites And Pathways Strategy; MGI = Mouse Genome Informatics; OMIM = Online Mendelian Inheritance in Man.
Table S12. Lead variants in PROMIS residing in exonic sequence. Abbreviations: HGNC = Human Genome Organisation (HUGO) Gene Nomenclature Committee.
Table S13. Lead variants in PROMIS in high linkage disequilibrium (r2 ≥ 0.8) with ≥ 1 non-synonymous SNP. Abbreviations: HGNC = Human Genome Organisation (HUGO) Gene Nomenclature Committee; SNP = Single Nucleotide Polymporphism.
Table S14. Lead SNP cis-eQTLs in PROMIS in lipid-relevant human tissues. Abbreviations: GTEx = Genotype-Tissue Expression; HGNC = Human Genome Organisation (HUGO) Gene Nomenclature Committee; MAF = Minor Allele Frequency; SE = Standard Error; TSS = Transcription Start Site.
Table S15. Enrichment analysis of cell-type specific enhancer overlap with our set of 90 lead variants from conditional analyses in PROMIS using HaploReg v4.1. Rows are ordered by binomial P-value (GWAS SNPs). Significant (P < 0.05) P-values are indicated by bold font. Abbreviations: GWAS = Genome-Wide Association Study; SNP = Single Nucleotide Polymorphism.
Table S16. Prediction of causal genes in INTERVAL based on integration of information from bottom-up and top-down SNP annotation approaches Abbreviations: CE = Cholesterol ester; Cer = Ceramide; DG = Diacylglycerol; FA = Fatty acids; GL = Glycerolipid; GP = Glycerophospholipid; LPC = Lysophosphatidylcholine; PA = Phosphatidate; PC = Phosphatidylcholine; PE = Phosphatidylethanolamine; PG = Phospha…
Table S17. Summary of associations between lipid metabolites in PROMIS and 175 major lipid loci. Abbreviations: m/z = Mass-to-charge ratio; SE = Standard Error.
Table S18. Summary of significant associations between lipid metabolites and genetic variants from univariate genome-wide association study in PROMIS with adjustment for clinical lipid measures. Analyses were adjusted for total cholesterol, HDL cholesterol, and triglycerides. Abbreviations: m/z = Mass-to-charge ratio; SE = Standard Error.

## Sheet: S1
Table S1. Lipids measured in PROMIS
Lipid m/z	Lipid name	Lipid category	Lipid main class	Lipid subclass	Ionisation mode	Adduct	Measured in INTERVAL	Lipid name in INTERVAL
199.17	FA(12:0)_[M-H]1-	Fatty acyls (FA)	Fatty acids and conjugates	Free fatty acids (FA)	negative	[M-H]-	No	FA(12:0)_[M-H]1-
227.202	FA(14:0)_[M-H]1-	Fatty acyls (FA)	Fatty acids and conjugates	Free fatty acids (FA)	negative	[M-H]-	Yes	FA(14:0)_[M-H]1-
241.217	FA(15:0)_[M-H]1-	Fatty acyls (FA)	Fatty acids and conjugates	Free fatty acids (FA)	negative	[M-H]-	Yes	FA(15:0)_[M-H]1-
253.217	FA(16:1)_[M-H]1-	Fatty acyls (FA)	Fatty acids and conjugates	Free fatty acids (FA)	negative	[M-H]-	Yes	FA(16:1)_[M-H]1-
255.233	FA(16:0)_[M-H]1-	Fatty acyls (FA)	Fatty acids and conjugates	Free fatty acids (FA)	negative	[M-H]-	Yes	FA(16:0)_[M-H]1-
267.233	FA(17:1)_[M-H]1-	Fatty acyls (FA)	Fatty acids and conjugates	Free fatty acids (FA)	negative	[M-H]-	Yes	FA(17:1)_[M-H]1-
269.249	FA(17:0)_[M-H]1-	Fatty acyls (FA)	Fatty acids and conjugates	Free fatty acids (FA)	negative	[M-H]-	Yes	FA(17:0)_[M-H]1-
277.217	FA(18:3)_[M-H]1-	Fatty acyls (FA)	Fatty acids and conjugates	Free fatty acids (FA)	negative	[M-H]-	Yes	FA(18:3)_[M-H]1-
279.233	FA(18:2)_[M-H]1-	Fatty acyls (FA)	Fatty acids and conjugates	Free fatty acids (FA)	negative	[M-H]-	Yes	FA(18:2)_[M-H]1-
281.249	FA(18:1)_[M-H]1-	Fatty acyls (FA)	Fatty acids and conjugates	Free fatty acids (FA)	negative	[M-H]-	Yes	FA(18:1)_[M-H]1-
283.264	FA(18:0)_[M-H]1-	Fatty acyls (FA)	Fatty acids and conjugates	Free fatty acids (FA)	negative	[M-H]-	Yes	FA(18:0)_[M-H]1-
301.217	FA(20:5)_[M-H]1-	Fatty acyls (FA)	Fatty acids and conjugates	Free fatty acids (FA)	negative	[M-H]-	No	FA(20:5)_[M-H]1-
303.233	FA(20:4)_[M-H]1-	Fatty acyls (FA)	Fatty acids and conjugates	Free fatty acids (FA)	negative	[M-H]-	Yes	FA(20:4)_[M-H]1-
305.249	FA(20:3)_[M-H]1-	Fatty acyls (FA)	Fatty acids and conjugates	Free fatty acids (FA)	negative	[M-H]-	Yes	FA(20:3)_[M-H]1-
325.311	FA(21:0)_[M-H]1-	Fatty acyls (FA)	Fatty acids and conjugates	Free fatty acids (FA)	negative	[M-H]-	No	FA(21:0)_[M-H]1-
327.233	FA(22:6)_[M-H]1-	Fatty acyls (FA)	Fatty acids and conjugates	Free fatty acids (FA)	negative	[M-H]-	Yes	FA(22:6)_[M-H]1-
329.249	FA(22:5)_[M-H]1-	Fatty acyls (FA)	Fatty acids and conjugates	Free fatty acids (FA)	negative	[M-H]-	Yes	FA(22:5)_[M-H]1-
331.264	FA(22:4)_[M-H]1-	Fatty acyls (FA)	Fatty acids and conjugates	Free fatty acids (FA)	negative	[M-H]-	Yes	FA(22:4)_[M-H]1-
339.327	FA(22:0)_[M-H]1-	Fatty acyls (FA)	Fatty acids and conjugates	Free fatty acids (FA)	negative	[M-H]-	Yes	FA(22:0)_[M-H]1-
353.343	FA(23:0)_[M-H]1-	Fatty acyls (FA)	Fatty acids and conjugates	Free fatty acids (FA)	negative	[M-H]-	No	FA(23:0)_[M-H]1-
365.342	FA(24:1)_[M-H]1-	Fatty acyls (FA)	Fatty acids and conjugates	Free fatty acids (FA)	negative	[M-H]-	No	FA(24:1)_[M-H]1-
367.358	FA(24:0)_[M-H]1-	Fatty acyls (FA)	Fatty acids and conjugates	Free fatty acids (FA)	negative	[M-H]-	No	FA(24:0)_[M-H]1-
369.351	Cholesterol_[M+H-H2O]1+	Sterol lipids (ST)	Sterols	Cholesterol and derivatives (Chol)	positive	[M+H-H2O]+	Yes	Cholesterol_[M+H-H2O]1+
482.325	LPC(15:0)_[M+H]1+ / LPE(18:0)_[M+H]1+	Glycerophospholipids (GP)	Glycerophosphocholines	Lysophosphatidylcholines (LPC)	positive	[M+H]+ / [M+H]+	Yes	LPC_15:0_[M+H]1+ / LPE_18:0_[M+H]1+
494.325	LPC(16:1)_[M+H]1+ / LPE(19:1)_[M+H]1+	Glycerophospholipids (GP)	Glycerophosphocholines	Lysophosphatidylcholines (LPC)	positive	[M+H]+ / [M+H]+	Yes	LPC_16:1_[M+H]1+ / LPE_19:1_[M+H]1+
496.34	LPC(16:0)_[M+H]1+ / LPE(19:0)_[M+H]1+	Glycerophospholipids (GP)	Glycerophosphocholines	Lysophosphatidylcholines (LPC)	positive	[M+H]+ / [M+H]+	Yes	LPC_16:0_[M+H]1+ / LPE_19:0_[M+H]1+
510.356	LPC(17:0)_[M+H]1+ / LPE(20:0)_[M+H]1+	Glycerophospholipids (GP)	Glycerophosphocholines	Lysophosphatidylcholines (LPC)	positive	[M+H]+ / [M+H]+	Yes	LPC_17:0_[M+H]1+ / LPE_20:0_[M+H]1+
520.34	LPC(18:2)_[M+H]1+	Glycerophospholipids (GP)	Glycerophosphocholines	Lysophosphatidylcholines (LPC)	positive	[M+H]+	No	LPC_18:2_[M+H]1+
521.457	DG(30:1)_[M+H-H2O]1+	Glycerolipids (GL)	Diradylglycerols	Diacylglycerols (DG)	positive	[M+H-H2O]+	Yes	DG_30:1_[M+H-H2O]1+
522.356	LPC(18:1)_[M+H]1+	Glycerophospholipids (GP)	Glycerophosphocholines	Lysophosphatidylcholines (LPC)	positive	[M+H]+	No	LPC_18:1_[M+H]1+
523.473	DG(30:0)_[M+H-H2O]1+	Glycerolipids (GL)	Diradylglycerols	Diacylglycerols (DG)	positive	[M+H-H2O]+	Yes	DG_30:0_[M+H-H2O]1+
524.372	LPC(18:0)_[M+H]1+	Glycerophospholipids (GP)	Glycerophosphocholines	Lysophosphatidylcholines (LPC)	positive	[M+H]+	No	LPC_18:0_[M+H]1+
536.505	Cer(34:1)_[M-H]1-	Sphingolipids (SP)	Ceramides	Ceramides (Cer)	negative	[M-H]-	No	Cer_34:1_[M-H]1-
544.34	LPC(20:4)_[M+H]1+	Glycerophospholipids (GP)	Glycerophosphocholines	Lysophosphatidylcholines (LPC)	positive	[M+H]+	Yes	LPC_20:4_[M+H]1+
547.473	DG(32:2)_[M+H-H2O]1+	Glycerolipids (GL)	Diradylglycerols	Diacylglycerols (DG)	positive	[M+H-H2O]+	Yes	DG_32:2_[M+H-H2O]1+
551.504	DG(32:0)_[M+H-H2O]1+	Glycerolipids (GL)	Diradylglycerols	Diacylglycerols (DG)	positive	[M+H-H2O]+	Yes	DG_32:0_[M+H-H2O]1+
573.488	DG(34:3)_[M+H-H2O]1+	Glycerolipids (GL)	Diradylglycerols	Diacylglycerols (DG)	positive	[M+H-H2O]+	Yes	DG_34:3_[M+H-H2O]1+
575.504	DG(34:2)_[M+H-H2O]1+	Glycerolipids (GL)	Diradylglycerols	Diacylglycerols (DG)	positive	[M+H-H2O]+	Yes	DG_34:2_[M+H-H2O]1+
577.519	DG(34:1)_[M+H-H2O]1+	Glycerolipids (GL)	Diradylglycerols	Diacylglycerols (DG)	positive	[M+H-H2O]+	Yes	DG_34:1_[M+H-H2O]1+
579.535	DG(34:0)_[M+H-H2O]1+	Glycerolipids (GL)	Diradylglycerols	Diacylglycerols (DG)	positive	[M+H-H2O]+	Yes	DG_34:0_[M+H-H2O]1+
597.488	DG(36:5)_[M+H-H2O]1+	Glycerolipids (GL)	Diradylglycerols	Diacylglycerols (DG)	positive	[M+H-H2O]+	Yes	DG_36:5_[M+H-H2O]1+
599.504	DG(36:4)_[M+H-H2O]1+	Glycerolipids (GL)	Diradylglycerols	Diacylglycerols (DG)	positive	[M+H-H2O]+	Yes	DG_36:4_[M+H-H2O]1+
601.519	DG(36:3)_[M+H-H2O]1+	Glycerolipids (GL)	Diradylglycerols	Diacylglycerols (DG)	positive	[M+H-H2O]+	Yes	DG_36:3_[M+H-H2O]1+
603.535	DG(36:2)_[M+H-H2O]1+	Glycerolipids (GL)	Diradylglycerols	Diacylglycerols (DG)	positive	[M+H-H2O]+	Yes	DG_36:2_[M+H-H2O]1+
605.551	DG(36:1)_[M+H-H2O]1+	Glycerolipids (GL)	Diradylglycerols	Diacylglycerols (DG)	positive	[M+H-H2O]+	Yes	DG_36:1_[M+H-H2O]1+
610.541	DG(34:2)_[M+NH4]1+	Glycerolipids (GL)	Diradylglycerols	Diacylglycerols (DG)	positive	[M+NH4]+	Yes	DG_34:2_[M+NH4]1+
612.556	DG(34:1)_[M+NH4]1+	Glycerolipids (GL)	Diradylglycerols	Diacylglycerols (DG)	positive	[M+NH4]+	Yes	DG_34:1_[M+NH4]1+
614.587	CE(14:0)_[M+NH4]1+	Sterol lipids (ST)	Sterols	Cholesteryl esters (CE)	positive	[M+NH4]+	Yes	CE_14:0_[M+NH4]1+
618.583	Cer(40:2)_[M-H]1-	Sphingolipids (SP)	Ceramides	Ceramides (Cer)	negative	[M-H]-	No	Cer_40:2_[M-H]1-
620.599	Cer(40:1)_[M-H]1-	Sphingolipids (SP)	Ceramides	Ceramides (Cer)	negative	[M-H]-	Yes	Cer_40:1_[M-H]1-
622.614	Cer(40:0)_[M-H]1-	Sphingolipids (SP)	Ceramides	Ceramides (Cer)	negative	[M-H]-	No	Cer_40:0_[M-H]1-
632.599	Cer(41:2)_[M-H]1-	Sphingolipids (SP)	Ceramides	Ceramides (Cer)	negative	[M-H]-	No	Cer_41:2_[M-H]1-
634.541	DG(36:4)_[M+NH4]1+	Glycerolipids (GL)	Diradylglycerols	Diacylglycerols (DG)	positive	[M+NH4]+	Yes	DG_36:4_[M+NH4]1+
634.614	Cer(41:1)_[M-H]1-	Sphingolipids (SP)	Ceramides	Ceramides (Cer)	negative	[M-H]-	Yes	Cer_41:1_[M-H]1-
636.557	DG(36:3)_[M+NH4]1+	Glycerolipids (GL)	Diradylglycerols	Diacylglycerols (DG)	positive	[M+NH4]+	Yes	DG_36:3_[M+NH4]1+
636.63	Cer(41:0)_[M-H]1-	Sphingolipids (SP)	Ceramides	Ceramides (Cer)	negative	[M-H]-	No	Cer_41:0_[M-H]1-
638.572	DG(36:2)_[M+NH4]1+	Glycerolipids (GL)	Diradylglycerols	Diacylglycerols (DG)	positive	[M+NH4]+	Yes	DG_36:2_[M+NH4]1+
640.602	CE(16:1)_[M+NH4]1+	Sterol lipids (ST)	Sterols	Cholesteryl esters (CE)	positive	[M+NH4]+	Yes	CE_16:1_[M+NH4]1+
642.618	CE(16:0)_[M+NH4]1+	Sterol lipids (ST)	Sterols	Cholesteryl esters (CE)	positive	[M+NH4]+	Yes	CE_16:0_[M+NH4]1+
650.646	Cer(42:0)_[M-H]1-	Sphingolipids (SP)	Ceramides	Ceramides (Cer)	negative	[M-H]-	No	Cer_42:0_[M-H]1-
654.618	CE(17:1)_[M+NH4]1+	Sterol lipids (ST)	Sterols	Cholesteryl esters (CE)	positive	[M+NH4]+	Yes	CE_17:1_[M+NH4]1+
656.43	PE(30:3)_[M-H]1-	Glycerophospholipids (GP)	Glycerophosphoethanolamines	Phosphatidylethanolamines (PE)	negative	[M-H]-	No	PE_30:3_[M-H]1-
659.514	SM(32:1)_[M-CH3]1-	Sphingolipids (SP)	Phosphosphingolipids	Sphingomyelins (SM)	negative	[M-CH3]-	No	SM_32:1_[M-CH3]1-
664.603	CE(18:3)_[M+NH4]1+	Sterol lipids (ST)	Sterols	Cholesteryl esters (CE)	positive	[M+NH4]+	Yes	CE_18:3_[M+NH4]1+
666.618	CE(18:2)_[M+NH4]1+	Sterol lipids (ST)	Sterols	Cholesteryl esters (CE)	positive	[M+NH4]+	Yes	CE_18:2_[M+NH4]1+
668.634	CE(18:1)_[M+NH4]1+	Sterol lipids (ST)	Sterols	Cholesteryl esters (CE)	positive	[M+NH4]+	Yes	CE_18:1_[M+NH4]1+
670.65	CE(18:0)_[M+NH4]1+	Sterol lipids (ST)	Sterols	Cholesteryl esters (CE)	positive	[M+NH4]+	Yes	CE_18:0_[M+NH4]1+
671.466	PA(34:2)_[M-H]1-	Glycerophospholipids (GP)	Glycerophosphates	Phosphatidates (PA)	negative	[M-H]-	Yes	PA_34:2_[M-H]1-
673.481	PA(34:1)_[M-H]1-	Glycerophospholipids (GP)	Glycerophosphates	Phosphatidates (PA)	negative	[M-H]-	Yes	PA_34:1_[M-H]1-
673.529	SM(33:1)_[M-CH3]1-	Sphingolipids (SP)	Phosphosphingolipids	Sphingomyelins (SM)	negative	[M-CH3]-	No	SM_33:1_[M-CH3]1-
675.543	SM(32:1)_[M+H]1+	Sphingolipids (SP)	Phosphosphingolipids	Sphingomyelins (SM)	positive	[M+H]+	Yes	SM_32:1_[M+H]1+
685.529	SM(34:2)_[M-CH3]1-	Sphingolipids (SP)	Phosphosphingolipids	Sphingomyelins (SM)	negative	[M-CH3]-	No	SM_34:2_[M-CH3]1-
687.545	SM(34:1)_[M-CH3]1-	Sphingolipids (SP)	Phosphosphingolipids	Sphingomyelins (SM)	negative	[M-CH3]-	No	SM_34:1_[M-CH3]1-
688.495	Cer(42:11)_[M+OAc]1-	Sphingolipids (SP)	Ceramides	Ceramides (Cer)	negative	[M+OAc]-	No	Cer_42:11_[M+OAc]1-
688.603	CE(20:5)_[M+NH4]1+	Sterol lipids (ST)	Sterols	Cholesteryl esters (CE)	positive	[M+NH4]+	Yes	CE_20:5_[M+NH4]1+
689.56	SM(34:0)_[M-CH3]1-	Sphingolipids (SP)	Phosphosphingolipids	Sphingomyelins (SM)	negative	[M-CH3]-	No	SM_34:0_[M-CH3]1-
690.51	Cer(42:10)_[M+OAc]1-	Sphingolipids (SP)	Ceramides	Ceramides (Cer)	negative	[M+OAc]-	No	Cer_42:10_[M+OAc]1-
690.618	CE(20:4)_[M+NH4]1+	Sterol lipids (ST)	Sterols	Cholesteryl esters (CE)	positive	[M+NH4]+	Yes	CE_20:4_[M+NH4]1+
692.634	CE(20:3)_[M+NH4]1+	Sterol lipids (ST)	Sterols	Cholesteryl esters (CE)	positive	[M+NH4]+	Yes	CE_20:3_[M+NH4]1+
698.63	TG(39:0)_[M+NH4]1+	Glycerolipids (GL)	Triradylglycerols	Triacylglycerols (TG)	positive	[M+NH4]+	No	TG_39:0_[M+NH4]1+
701.559	SM(34:2)_[M+H]1+	Sphingolipids (SP)	Phosphosphingolipids	Sphingomyelins (SM)	positive	[M+H]+	Yes	SM_34:2_[M+H]1+
702.508	PC(30:1)_[M-H]- / PE(33:1)_[M-H]-	Glycerophospholipids (GP)	Glycerophosphocholines	Phosphatidylcholines (PC)	negative	[M-H]- / [M-H]-	Yes	PC_30:1_[M-H]- / PE_33:1_[M-H]1-
703.575	SM(34:1)_[M+H]1+	Sphingolipids (SP)	Phosphosphingolipids	Sphingomyelins (SM)	positive	[M+H]+	Yes	SM_34:1_[M+H]1+
705.591	SM(34:0)_[M+H]1+	Sphingolipids (SP)	Phosphosphingolipids	Sphingomyelins (SM)	positive	[M+H]+	Yes	SM_34:0_[M+H]1+
706.613	CEoxid(20:4)_[M+NH4]1+	Sterol lipids (ST)	Sterols	Cholesteryl esters (CE)	positive	[M+NH4]+	No	CE_oxid(20:4)_[M+NH4]1+
706.635	Cer(42:2)_[M+OAc]1-	Sphingolipids (SP)	Ceramides	Ceramides (Cer)	negative	[M+OAc]-	No	Cer_42:2_[M+OAc]1-
707.598	DG(44:6)_[M+H-H2O]1+	Glycerolipids (GL)	Diradylglycerols	Diacylglycerols (DG)	positive	[M+H-H2O]+	Yes	DG_44:6_[M+H-H2O]1+
708.651	Cer(42:1)_[M+OAc]1-	Sphingolipids (SP)	Ceramides	Ceramides (Cer)	negative	[M+OAc]-	Yes	Cer_42:1_[M+OAc]1-
713.561	SM(36:2)_[M-CH3]1-	Sphingolipids (SP)	Phosphosphingolipids	Sphingomyelins (SM)	negative	[M-CH3]-	No	SM_35:2_[M-H]1-
715.576	SM(36:1)_[M-CH3]1-	Sphingolipids (SP)	Phosphosphingolipids	Sphingomyelins (SM)	negative	[M-CH3]-	No	SM_36:1_[M-CH3]1-
716.523	PE(34:2)_[M+H]1+	Glycerophospholipids (GP)	Glycerophosphoethanolamines	Phosphatidylethanolamines (PE)	positive	[M+H]+	No	PE_34:2_[M+H]1+
716.524	PE(34:1)_[M-H]1-	Glycerophospholipids (GP)	Glycerophosphoethanolamines	Phosphatidylethanolamines (PE)	negative	[M-H]-	Yes	PE_34:1_[M-H]1-
716.526	Cer(44:11)_[M+OAc]1-	Sphingolipids (SP)	Ceramides	Ceramides (Cer)	negative	[M+OAc]-	No	Cer_44:11_[M+OAc]1-
717.592	SM(36:0)_[M-CH3]1-	Sphingolipids (SP)	Phosphosphingolipids	Sphingomyelins (SM)	negative	[M-CH3]-	No	SM_36:0_[M-H]1-
720.554	PE(34:0)_[M+H]1+	Glycerophospholipids (GP)	Glycerophosphoethanolamines	Phosphatidylethanolamines (PE)	positive	[M+H]+	No	PE_34:0_[M+H]1+
720.591	PC-O(32:0)_[M+H]1+ / PE-O(35:0)_[M+H]1+	Glycerophospholipids (GP)	Glycerophosphocholines	Phosphatidylcholines (PC)	positive	[M+H]+ / [M+H]+	Yes	PC-O_32:0_[M+H]1+ / PE-O_35:0_[M+H]1+
729.591	SM(36:2)_[M+H]1+	Sphingolipids (SP)	Phosphosphingolipids	Sphingomyelins (SM)	positive	[M+H]+	Yes	SM_36:2_[M+H]1+
729.592	SM(37:1)_[M-CH3]1-	Sphingolipids (SP)	Phosphosphingolipids	Sphingomyelins (SM)	negative	[M-CH3]-	No	SM_37:1_[M-CH3]1-
730.539	PC(32:2)_[M+H]1+ / PE(35:2)_[M+H]1+ / PA(37:3)_[M+NH4]1+	Glycerophospholipids (GP)	Glycerophosphocholines	Phosphatidylcholines (PC)	positive	[M+H]+ / [M+H]+ / [M+NH4]+	Yes	PC_32:2_[M+H]1+ / PE_35:2_[M+H]1+ / PA_37:3_[M+NH4]1+
730.575	PC-O(33:2)_[M+H]1+ / PC-P(33:1)_[M+H]1+	Glycerophospholipids (GP)	Glycerophosphocholines	Phosphatidylcholines (PC)	positive	[M+H]+ / [M+H]+	No	PC-O_33:2_[M+H]1+ / PC-P(33:1)_[M+H]1+
731.535	SM(32:2)_[M+OAc]1-	Sphingolipids (SP)	Phosphosphingolipids	Sphingomyelins (SM)	negative	[M+OAc]-	No	SM_32:2_[M+OAc]1-
731.559	PA(38:1)_[M+H]1+	Glycerophospholipids (GP)	Glycerophosphates	Phosphatidates (PA)	positive	[M+H]+	No	PA_38:1_[M+H]1+
731.606	SM(36:1)_[M+H]1+	Sphingolipids (SP)	Phosphosphingolipids	Sphingomyelins (SM)	positive	[M+H]+	Yes	SM_36:1_[M+H]1+
732.554	PC(32:1)_[M+H]1+ / PE(35:1)_[M+H]1+ / PA(37:2)_[M+NH4]1+	Glycerophospholipids (GP)	Glycerophosphocholines	Phosphatidylcholines (PC)	positive	[M+H]+ / [M+H]+ / [M+NH4]+	Yes	PC_32:1_[M+H]1+ / PE_35:1_[M+H]1+ / PA_37:2_[M+NH4]1+
733.622	SM(36:0)_[M+H]1+	Sphingolipids (SP)	Phosphosphingolipids	Sphingomyelins (SM)	positive	[M+H]+	Yes	SM_36:0_[M+H]1+
734.57	PC(32:0)_[M+H]1+ / PE(35:0)_[M+H]1+ / PA(37:1)_[M+NH4]1+	Glycerophospholipids (GP)	Glycerophosphocholines	Phosphatidylcholines (PC)	positive	[M+H]+ / [M+H]+ / [M+NH4]+	Yes	PC_32:0_[M+H]1+ / PE_35:0_[M+H]1+ / PA_37:1_[M+NH4]1+
735.518	PA(34:0)_[M+OAc]1-	Glycerophospholipids (GP)	Glycerophosphates	Phosphatidates (PA)	negative	[M+OAc]-	No	PA_34:0_[M+AcO]1-
738.508	PE(36:4)_[M-H]1-	Glycerophospholipids (GP)	Glycerophosphoethanolamines	Phosphatidylethanolamines (PE)	negative	[M-H]-	Yes	PE_36:4_[M-H]1-
740.523	PE(36:4)_[M+H]1+	Glycerophospholipids (GP)	Glycerophosphoethanolamines	Phosphatidylethanolamines (PE)	positive	[M+H]+	Yes	PC_33:4_[M+H]1+ / PE_36:4_[M+H]1+ / PA_38:5_[M+NH4]1+
742.539	PC(33:3)_[M+H]1+ / PE(36:3)_[M+H]1+ / PA(38:4)_[M+NH4]1+	Glycerophospholipids (GP)	Glycerophosphocholines	Phosphatidylcholines (PC)	positive	[M+H]+ / [M+H]+ / [M+NH4]+	Yes	PC_33:3_[M+H]1+ / PE_36:3_[M+H]1+ / PA_38:4_[M+NH4]1+
742.575	PC-O(34:3)_[M+H]1+ / PE-P(37:2)_[M+H]1+	Glycerophospholipids (GP)	Glycerophosphocholines	Phosphatidylcholines (PC)	positive	[M+H]+ / [M+H]+	Yes	PC-O_34:3_[M+H]1+ / PC-P_34:2_[M+H]1+ / PE-P_37:2_[M+H]1+
743.607	SM(38:1)_[M+CH3]1-	Sphingolipids (SP)	Phosphosphingolipids	Sphingomyelins (SM)	negative	[M-CH3]-	No	SM_38:1_[M-CH3]1-
744.554	PC(33:2)_[M+H]1+ / PE(36:2)_[M+H]1+ / PA(38:3)_[M+NH4]1+	Glycerophospholipids (GP)	Glycerophosphocholines	Phosphatidylcholines (PC)	positive	[M+H]+ / [M+H]+ / [M+NH4]+	Yes	PC_33:2_[M+H]1+ / PE_36:2_[M+H]1+ / PA_38:3_[M+NH4]1+
744.59	PC-O(34:2)_[M+H]1+ / PE-O(37:2)_[M+H]1+	Glycerophospholipids (GP)	Glycerophosphocholines	Phosphatidylcholines (PC)	positive	[M+H]+ / [M+H]+	Yes	PC-O_34:2_[M+H]1+ / PC-P_34:1_[M+H]1+ / PE-O_37:2_[M+H]1+
745.575	PA(39:1)_[M+H]1+	Glycerophospholipids (GP)	Glycerophosphates	Phosphatidates (PA)	positive	[M+H]+	No	PA_39:1_[M+H]1+
745.622	SM(37:1)_[M+H]1+	Sphingolipids (SP)	Phosphosphingolipids	Sphingomyelins (SM)	positive	[M+H]+	Yes	SM_37:1_[M+H]1+
746.57	PC(33:1)_[M+H]1+ / PE(36:1)_[M+H]1+ / PA(38:2)_[M+NH4]1+	Glycerophospholipids (GP)	Glycerophosphocholines	Phosphatidylcholines (PC)	positive	[M+H]+ / [M+H]+ / [M+NH4]+	Yes	PC_33:1_[M+H]1+ / PE_36:1_[M+H]1+ / PA_38:2_[M+NH4]1+
746.57	PE(36:0)_[M-H]1-	Glycerophospholipids (GP)	Glycerophosphoethanolamines	Phosphatidylethanolamines (PE)	negative	[M-H]-	No	PE_36:0_[M-H]1-
746.606	PC-O(34:1)_[M+H]1+ / PC-P(34:0)_[M+H]1+ / PE-O(37:1)_[M+H]1+	Glycerophospholipids (GP)	Glycerophosphocholines	Phosphatidylcholines (PC)	positive	[M+H]+ / [M+H]+ / [M+H]+	Yes	PC-O_34:1_[M+H]1+ / PC-P_34:0_[M+H]1+ / PE-O_37:1_[M+H]1+
747.518	PG(34:1)_[M-H]1-	Glycerophospholipids (GP)	Glycerophosphoglycerols	Phosphatidylglycerols (PG)	negative	[M-H]-	Yes	PG_34:1_[M-H]1-
747.566	SM(33:1)_[M+OAc]1-	Sphingolipids (SP)	Phosphosphingolipids	Sphingomyelins (SM)	negative	[M+OAc]-	Yes	SM_33:1_[M+OAc]1-
747.59	PA(39:0)_[M+H]1+	Glycerophospholipids (GP)	Glycerophosphates	Phosphatidates (PA)	positive	[M+H]+	No	PA_39:0_[M+H]1+
749.534	PG(34:0)_[M-H]1-	Glycerophospholipids (GP)	Glycerophosphoglycerols	Phosphatidylglycerols (PG)	negative	[M-H]-	Yes	PG_34:0_[M-H]1-
749.582	SM(33:0)_[M+OAc]1-	Sphingolipids (SP)	Phosphosphingolipids	Sphingomyelins (SM)	negative	[M+OAc]-	No	SM_33:0_[M+OAc]1-
750.544	PE-O(38:6)_[M+H]1+ / PC-P(35:5)_[M+H]1+	Glycerophospholipids (GP)	Glycerophosphoethanolamines	Phosphatidylethanolamines (PE)	positive	[M+H]+ / [M+H]+	Yes	PE-O_38:6_[M+H]1+ / PE-P_38:5_[M+H]1+
752.559	PE-O(38:4)_[M-H]1- / PC-O(35:4)_[M-H]1- / PC-P(35:3)_[M-H]1-	Glycerophospholipids (GP)	Glycerophosphoethanolamines	Phosphatidylethanolamines (PE)	negative	[M-H]- / [M-H]- / [M-H]-	Yes	PE-O_38:4_[M-H]1- / PE-P_38:3_[M-H]1-
754.539	PC(34:4)_[M+H]1+ / PE(37:4)_[M+H]1+ / PA(39:5)_[M+NH4]1+	Glycerophospholipids (GP)	Glycerophosphocholines	Phosphatidylcholines (PC)	positive	[M+H]+ / [M+H]+ / [M+NH4]+	Yes	PC_34:4_[M+H]1+ / PE_37:4_[M+H]1+ / PA_39:5_[M+NH4]1+
756.554	PC(34:3)_[M+H]1+ / PE(37:3)_[M+H]1+ / PA(39:4)_[M+NH4]1+	Glycerophospholipids (GP)	Glycerophosphocholines	Phosphatidylcholines (PC)	positive	[M+H]+ / [M+H]+ / [M+NH4]+	Yes	PC_34:3_[M+H]1+ / PE_37:3_[M+H]1+ / PA_39:4_[M+NH4]1+
757.502	PG(35:3)_[M-H]1-	Glycerophospholipids (GP)	Glycerophosphoglycerols	Phosphatidylglycerols (PG)	negative	[M-H]-	Yes	PG_35:3_[M-H]1-
757.623	SM(39:1)_[M-CH3]1-	Sphingolipids (SP)	Phosphosphingolipids	Sphingomyelins (SM)	negative	[M-CH3]-	No	SM_39:1_[M-CH3]1-
758.57	PC(34:2)_[M+H]1+ / PE(37:2)_[M+H]1+ / PA(39:3)_[M+NH4]1+	Glycerophospholipids (GP)	Glycerophosphocholines	Phosphatidylcholines (PC)	positive	[M+H]+ / [M+H]+ / [M+NH4]+	Yes	PC_34:2_[M+H]1+ / PE_37:2_[M+H]1+ / PA_39:3_[M+NH4]1+
759.518	PG(35:2)_[M-H]1-	Glycerophospholipids (GP)	Glycerophosphoglycerols	Phosphatidylglycerols (PG)	negative	[M-H]-	No	PG_35:2_[M-H]1-
759.637	SM(38:1)_[M+H]1+	Sphingolipids (SP)	Phosphosphingolipids	Sphingomyelins (SM)	positive	[M+H]+	Yes	SM_38:1_[M+H]1+
760.585	PC(34:1)_[M+H]1+ / PE(37:1)_[M+H]1+ / PA(39:2)_[M+NH4]1+	Glycerophospholipids (GP)	Glycerophosphocholines	Phosphatidylcholines (PC)	positive	[M+H]+ / [M+H]+ / [M+NH4]+	Yes	PC_34:1_[M+H]1+ / PE_37:1_[M+H]1+ / PA_39:2_[M+NH4]1+
761.558	SM(39:7)_[M+H]1+	Sphingolipids (SP)	Phosphosphingolipids	Sphingomyelins (SM)	positive	[M+H]+	No	SM_39:7_[M+H]1+
761.653	SM(38:0)_[M+H]1+	Sphingolipids (SP)	Phosphosphingolipids	Sphingomyelins (SM)	positive	[M+H]+	No	SM_38:0_[M+H]1+
763.574	SM(39:6)_[M+H]1+	Sphingolipids (SP)	Phosphosphingolipids	Sphingomyelins (SM)	positive	[M+H]+	No	SM_39:6_[M+H]1+
764.524	PE(38:5)_[M-H]1-	Glycerophospholipids (GP)	Glycerophosphoethanolamines	Phosphatidylethanolamines (PE)	negative	[M-H]-	Yes	PE_38:5_[M-H]1-
766.574	PC-O(36:5)_[M+H]1+ / PC-P(36:4)_[M+H]1+	Glycerophospholipids (GP)	Glycerophosphocholines	Phosphatidylcholines (PC)	positive	[M+H]+ / [M+H]+	Yes	PC-O_36:5_[M+H]1+ / PC-P_36:4_[M+H]1+
766.692	TG(44:1)_[M+NH4]1+	Glycerolipids (GL)	Triradylglycerols	Triacylglycerols (TG)	positive	[M+NH4]+	Yes	TG_44:1_[M+NH4]1+
768.554	PC(35:4)_[M+H]1+ / PE(38:4)_[M+H]1+ / PA(40:5)_[M+NH4]1+	Glycerophospholipids (GP)	Glycerophosphocholines	Phosphatidylcholines (PC)	positive	[M+H]+ / [M+H]+ / [M+NH4]+	Yes	PC_35:4_[M+H]1+ / PE_38:4_[M+H]1+ / PA_40:5_[M+NH4]1+
768.591	PC-O(36:4)_[M+H]1+ / PC-P(36:3)_[M+H]1+	Glycerophospholipids (GP)	Glycerophosphocholines	Phosphatidylcholines (PC)	positive	[M+H]+ / [M+H]+	Yes	PC-O_36:4_[M+H]1+ / PC-P_36:3_[M+H]1+
768.708	TG(44:0)_[M+NH4]1+	Glycerolipids (GL)	Triradylglycerols	Triacylglycerols (TG)	positive	[M+NH4]+	No	TG_44:0_[M+NH4]1+
769.623	SM(40:2)_[M-CH3]1-	Sphingolipids (SP)	Phosphosphingolipids	Sphingomyelins (SM)	negative	[M-CH3]-	No	SM_40:2_[M-CH3]1-
770.57	PC(35:3)_[M+H]1+ / PE(38:3)_[M+H]1+ / PA(40:4)_[M+NH4]1+	Glycerophospholipids (GP)	Glycerophosphocholines	Phosphatidylcholines (PC)	positive	[M+H]+ / [M+H]+ / [M+NH4]+	Yes	PC_35:3_[M+H]1+ / PE_38:3_[M+H]1+ / PA_40:4_[M+NH4]1+
770.606	PC-O(36:3)_M+H]1+ / PC-P(36:2)_M+H]1+	Glycerophospholipids (GP)	Glycerophosphocholines	Phosphatidylcholines (PC)	positive	[M+H]+ / [M+H]+	Yes	PC-O_36:3_[M+H]1+ / PC-P_36:2_[M+H]1+
771.59	PA(41:2)_[M+H]1+	Glycerophospholipids (GP)	Glycerophosphates	Phosphatidates (PA)	positive	[M+H]+	No	PA_41:2_[M+H]1+
771.639	SM(40:1)_[M-CH3]1-	Sphingolipids (SP)	Phosphosphingolipids	Sphingomyelins (SM)	negative	[M-CH3]-	No	SM_40:1_[M-CH3]1-
772.586	PC(35:2)_[M+H]1+ / PE(38:2)_[M+H]1+ / PA(40:3)_[M+NH4]1+	Glycerophospholipids (GP)	Glycerophosphocholines	Phosphatidylcholines (PC)	positive	[M+H]+ / [M+H]+ / [M+NH4]+	Yes	PC_35:2_[M+H]1+ / PE_38:2_[M+H]1+ / PA_40:3_[M+NH4]1+
772.586	PE(38:1)_[M-H]1-	Glycerophospholipids (GP)	Glycerophosphoethanolamines	Phosphatidylethanolamines (PE)	negative	[M-H]-	No	PE_38:1_[M-H]1-
772.622	PC-O(36:2)_[M+H]1+ / PE-P(39:1)_[M+H]1+	Glycerophospholipids (GP)	Glycerophosphocholines	Phosphatidylcholines (PC)	positive	[M+H]+ / [M+H]+	Yes	PC-O_36:2_[M+H]1+ / PC-P_36:1_[M+H]1+ / PE-P_39:1_[M+H]1+
773.534	PG(36:2)_[M-H]1-	Glycerophospholipids (GP)	Glycerophosphoglycerols	Phosphatidylglycerols (PG)	negative	[M-H]-	Yes	PG_36:2_[M-H]1-
773.653	SM(39:1)_[M+H]1+	Sphingolipids (SP)	Phosphosphingolipids	Sphingomyelins (SM)	positive	[M+H]+	Yes	SM_39:1_[M+H]1+
773.654	SM(39:0)_[M+H]1-	Sphingolipids (SP)	Phosphosphingolipids	Sphingomyelins (SM)	negative	[M+H]-	No	SM_39:0_[M-H]1-
773.654	SM(40:0)_[M-CH3]1-	Sphingolipids (SP)	Phosphosphingolipids	Sphingomyelins (SM)	negative	[M-CH3]-	No	SM_40:0_[M-H]1-
774.601	PC(35:1)_[M+H]1+ / PE(38:1)_[M+H]1+ / PA(40:2)_[M+NH4]1+	Glycerophospholipids (GP)	Glycerophosphocholines	Phosphatidylcholines (PC)	positive	[M+H]+ / [M+H]+ / [M+NH4]+	Yes	PC_35:1_[M+H]1+ / PE_38:1_[M+H]1+ / PA_40:2_[M+NH4]1+
774.638	PC-O(36:1)_[M+H]1+ / PE-O(39:1)_[M+H]1+ / PC-P(36:0)_[M+H]1+	Glycerophospholipids (GP)	Glycerophosphocholines	Phosphatidylcholines (PC)	positive	[M+H]+ / [M+H]+ / [M+H]+	Yes	PC-O_36:1_[M+H]1+ / PC-P_36:0_[M+H]1+ / PE-O_39:1_[M+H]1+
775.549	PG(36:1)_[M-H]1-	Glycerophospholipids (GP)	Glycerophosphoglycerols	Phosphatidylglycerols (PG)	negative	[M-H]-	Yes	PG_36:1_[M-H]1-
775.574	SM(40:7)_[M+H]1+	Sphingolipids (SP)	Phosphosphingolipids	Sphingomyelins (SM)	positive	[M+H]+	No	SM_40:7_[M+H]1+
777.565	PG(36:0)_[M-H]1-	Glycerophospholipids (GP)	Glycerophosphoglycerols	Phosphatidylglycerols (PG)	negative	[M-H]-	Yes	PG_36:0_[M-H]1-
779.508	PG(32:1)_[M+OAc]1-	Glycerophospholipids (GP)	Glycerophosphoglycerols	Phosphatidylglycerols (PG)	negative	[M+OAc]-	No	PG_32:1_[M+OAc]1-
782.57	PC(36:4)_[M+H]1+ / PE(39:4)_[M+H]1+ / PA(41:5)_[M+NH4]1+	Glycerophospholipids (GP)	Glycerophosphocholines	Phosphatidylcholines (PC)	positive	[M+H]+ / [M+H]+ / [M+NH4]+	Yes	PC_36:4_[M+H]1+ / PE_39:4_[M+H]1+ / PA_41:5_[M+NH4]1+
783.639	SM(41:2)_[M-CH3]1-	Sphingolipids (SP)	Phosphosphingolipids	Sphingomyelins (SM)	negative	[M-CH3]-	No	SM_41:2_[M-CH3]1-
784.586	PC(36:3)_[M+H]1+ / PE(39:3)_[M+H]1+ / PA(41:4)_[M+NH4]1+	Glycerophospholipids (GP)	Glycerophosphocholines	Phosphatidylcholines (PC)	positive	[M+H]+ / [M+H]+ / [M+NH4]+	Yes	PC_36:3_[M+H]1+ / PE_39:3_[M+H]1+ / PA_41:4_[M+NH4]1+
785.534	PG(37:3)_[M-H]1-	Glycerophospholipids (GP)	Glycerophosphoglycerols	Phosphatidylglycerols (PG)	negative	[M-H]-	Yes	PG_37:3_[M-H]1-
785.582	SM(36:3)_[M+OAc]1-	Sphingolipids (SP)	Phosphosphingolipids	Sphingomyelins (SM)	negative	[M+OAc]-	Yes	SM_36:3_[M+OAc]1-
785.654	SM(41:1)_[M-CH3]1-	Sphingolipids (SP)	Phosphosphingolipids	Sphingomyelins (SM)	negative	[M-CH3]-	No	SM_41:1_[M-CH3]1-
786.601	PC(36:2)_[M+H]1+ / PE(39:2)_[M+H]1+ / PA(41:3)_[M+NH4]1+	Glycerophospholipids (GP)	Glycerophosphocholines	Phosphatidylcholines (PC)	positive	[M+H]+ / [M+H]+ / [M+NH4]+	Yes	PC_36:2_[M+H]1+ / PE_39:2_[M+H]1+ / PA_41:3_[M+NH4]1+
788.524	PE(40:7)_[M-H]1-	Glycerophospholipids (GP)	Glycerophosphoethanolamines	Phosphatidylethanolamines (PE)	negative	[M-H]-	Yes	PE_40:7_[M-H]1-
788.545	PC(32:2)_[M+OAc]1- / PS(36:1)_[M-H]1-	Glycerophospholipids (GP)	Glycerophosphocholines	Phosphatidylcholines (PC)	negative	[M+OAc]- / [M-H]-	Yes	PC_32:2_[M+OAc]1- / PS_36:1_[M-H]1-
788.617	PC(36:1)_[M+H]1+ / PE(39:1)_[M+H]1+ / PA(41:2)_[M+NH4]1+	Glycerophospholipids (GP)	Glycerophosphocholines	Phosphatidylcholines (PC)	positive	[M+H]+ / [M+H]+ / [M+NH4]+	Yes	PC_36:1_[M+H]1+ / PE_39:1_[M+H]1+ / PA_41:2_[M+NH4]1+
789.544	PA(43:6)_[M-H]1-	Glycerophospholipids (GP)	Glycerophosphates	Phosphatidates (PA)	negative	[M-H]-	No	PA_43:6_[M-H]1-
790.56	PC(32:1)_[M+OAc]1-	Glycerophospholipids (GP)	Glycerophosphocholines	Phosphatidylcholines (PC)	negative	[M+OAc]-	No	PC_32:1_[M+AcO]1-
790.633	PC(36:0)_[M+H]1+ / PE(39:0)_[M+H]1+ / PA(41:1)_[M+NH4]1+	Glycerophospholipids (GP)	Glycerophosphocholines	Phosphatidylcholines (PC)	positive	[M+H]+ / [M+H]+ / [M+NH4]+	Yes	PC_36:0_[M+H]1+ / PE_39:0_[M+H]1+ / PA_41:1_[M+NH4]1+
790.669	PC-O(37:0)_[M+H]1+	Glycerophospholipids (GP)	Glycerophosphocholines	Phosphatidylcholines (PC)	positive	[M+H]+	No	PC-O_37:0_[M+H]1+
792.554	PC(37:6)_[M+H]1+ / PE(40:6)_[M+H]1+ / PA(42:7)_[M+NH4]1+	Glycerophospholipids (GP)	Glycerophosphocholines	Phosphatidylcholines (PC)	positive	[M+H]+ / [M+H]+ / [M+NH4]+	Yes	PC_37:6_[M+H]1+ / PE_40:6_[M+H]1+ / PA_42:7_[M+NH4]1+
792.708	TG(46:2)_[M+NH4]1+	Glycerolipids (GL)	Triradylglycerols	Triacylglycerols (TG)	positive	[M+NH4]+	Yes	TG_46:2_[M+NH4]1+
793.575	PA(43:4)_[M-H]1-	Glycerophospholipids (GP)	Glycerophosphates	Phosphatidates (PA)	negative	[M-H]-	No	PA_43:4_[M-H]1-
794.569	PC(37:5)_[M+H]1+ / PE(40:5)_[M+H]1+ / PA(42:6)_[M+NH4]1+	Glycerophospholipids (GP)	Glycerophosphocholines	Phosphatidylcholines (PC)	positive	[M+H]+ / [M+H]+ / [M+NH4]+	Yes	PC_37:5_[M+H]1+ / PE_40:5_[M+H]1+ / PA_42:6_[M+NH4]1+
794.606	PC-O(38:5)_[M+H]1+ / PC-P(38:4)_[M+H]1+	Glycerophospholipids (GP)	Glycerophosphocholines	Phosphatidylcholines (PC)	positive	[M+H]+ / [M+H]+	Yes	PC-O_38:5_[M+H]1+ / PC-P_38:4_[M+H]1+
794.723	TG(46:1)_[M+NH4]1+	Glycerolipids (GL)	Triradylglycerols	Triacylglycerols (TG)	positive	[M+NH4]+	Yes	TG_46:1_[M+NH4]1+
796.513	PE(36:5)_[M+OAc]1-	Glycerophospholipids (GP)	Glycerophosphoethanolamines	Phosphatidylethanolamines (PE)	negative	[M+OAc]-	No	PE_36:5_[M+OAc]1-
796.586	PC(37:4)_[M+H]1+ / PE(40:4)_[M+H]1+ / PA(42:5)_[M+NH4]1+	Glycerophospholipids (GP)	Glycerophosphocholines	Phosphatidylcholines (PC)	positive	[M+H]+ / [M+H]+ / [M+NH4]+	Yes	PC_37:4_[M+H]1+ / PE_40:4_[M+H]1+ / PA_42:5_[M+NH4]1+
796.622	PC-O(38:4)_[M+H]1+ / PC-P(38:3)_[M+H]1+	Glycerophospholipids (GP)	Glycerophosphocholines	Phosphatidylcholines (PC)	positive	[M+H]+ / [M+H]+	Yes	PC-O_38:4_[M+H]1+ / PC-P_38:3_[M+H]1+
796.739	TG(46:0)_[M+NH4]1+	Glycerolipids (GL)	Triradylglycerols	Triacylglycerols (TG)	positive	[M+NH4]+	Yes	TG_46:0_[M+NH4]1+
798.601	PC(37:4)_[M+H]1+ / PE(40:3)_[M+H]1+	Glycerophospholipids (GP)	Glycerophosphocholines	Phosphatidylcholines (PC)	positive	[M+H]+ / [M+H]+	No	PC_37:3_[M+H]1+ / PE_40:3_[M+H]1+
798.602	PE(40:2)_[M-H]1-	Glycerophospholipids (GP)	Glycerophosphoethanolamines	Phosphatidylethanolamines (PE)	negative	[M-H]-	No	PE_40:2_[M-H]1-
799.574	SM(42:9)_[M+H]1+	Sphingolipids (SP)	Phosphosphingolipids	Sphingomyelins (SM)	positive	[M+H]+	No	SM_42:9_[M+H]1+
799.668	SM(41:2)_[M+H]1+	Sphingolipids (SP)	Phosphosphingolipids	Sphingomyelins (SM)	positive	[M+H]+	Yes	SM_41:2_[M+H]1+
799.67	SM(42:1)_[M-CH3]1-	Sphingolipids (SP)	Phosphosphingolipids	Sphingomyelins (SM)	negative	[M-CH3]-	No	SM_42:1_[M-CH3]1-
801.684	SM(41:1)_[M+H]1+	Sphingolipids (SP)	Phosphosphingolipids	Sphingomyelins (SM)	positive	[M+H]+	No	SM_41:1_[M+H]1+
802.574	PC-P(39:7) _[M+H]1+	Glycerophospholipids (GP)	Glycerophosphocholines	Phosphatidylcholines (PC)	positive	[M+H]+	No	PC-P_39:7_[M+H]1+
806.569	PC(38:6)_[M+H]1+ / PE(41:6)_[M+H]1+	Glycerophospholipids (GP)	Glycerophosphocholines	Phosphatidylcholines (PC)	positive	[M+H]+ / [M+H]+	Yes	PC_38:6_[M+H]1+ / PE_41:6_[M+H]1+
807.503	PI(32:1)_[M-H]1-	Glycerophospholipids (GP)	Glycerophosphoinositols	Phosphatidylinositols (PI)	negative	[M-H]-	No	P1_32:1_[M-H]1-
808.534	PS(33:0)_[M+OAc]1-	Glycerophospholipids (GP)	Glycerophosphoserines	Phosphatidylserines (PS)	negative	[M+OAc]-	No	PS_33:0_[M+OAc]1-
808.585	PC(38:5)_[M+H]1+ / PE(41:5)_[M+H]1+ / PA(43:6)_[M+NH4]1+	Glycerophospholipids (GP)	Glycerophosphocholines	Phosphatidylcholines (PC)	positive	[M+H]+ / [M+H]+ / [M+NH4]+	Yes	PC_38:5_[M+H]1+ / PE_41:5_[M+H]1+ / PA_43:6_[M+NH4]1+
808.739	TG(47:1)_[M+NH4]1+	Glycerolipids (GL)	Triradylglycerols	Triacylglycerols (TG)	positive	[M+NH4]+	Yes	TG_47:1_[M+NH4]1+
809.534	PA(40:5)_[M+OAc]1- / PG(39:5)_[M-H]1-	Glycerophospholipids (GP)	Glycerophosphates	Phosphatidates (PA)	negative	[M+OAc]- / [M-H]-	No	PA_40:5_[M+OAc]1- / PG_39:5_[M-H]1-
809.555	PI-O(33:0)_[M-H]1-	Glycerophospholipids (GP)	Glycerophosphoinositols	Phosphatidylinositols (PI)	negative	[M-H]-	Yes	PI-O_33:0_[M-H]1-
809.653	SM(42:4)_[M+H]1+	Sphingolipids (SP)	Phosphosphingolipids	Sphingomyelins (SM)	positive	[M+H]+	No	SM_42:4_[M+H]1+
810.529	PC(34:5)_[M+OAc]1- / PE(37:5)_[M+OAc]1-	Glycerophospholipids (GP)	Glycerophosphocholines	Phosphatidylcholines (PC)	negative	[M+OAc]- / [M+OAc]-	No	PC_34:5_[M+OAc]1- / PE_37:5_[M+OAc]1-
810.601	PC(38:4)_[M+H]1+ / PE(41:4)_[M+H]1+	Glycerophospholipids (GP)	Glycerophosphocholines	Phosphatidylcholines (PC)	positive	[M+H]+ / [M+H]+	Yes	PC_38:4_[M+H]1+ / PE_41:4_[M+H]1+
811.669	SM(42:3)_[M+H]1+	Sphingolipids (SP)	Phosphosphingolipids	Sphingomyelins (SM)	positive	[M+H]+	Yes	SM_42:3_[M+H]1+
811.67	SM(43:2)_[M-CH3]1-	Sphingolipids (SP)	Phosphosphingolipids	Sphingomyelins (SM)	negative	[M-CH3]-	No	SM_43:2_[M-CH3]1-
812.617	PC(38:3)_[M+H]1+ / PE(41:3)_[M+H]1+ / PA(43:4)_[M+NH4]1+	Glycerophospholipids (GP)	Glycerophosphocholines	Phosphatidylcholines (PC)	positive	[M+H]+ / [M+H]+ / [M+NH4]+	Yes	PC_38:3_[M+H]1+ / PE_41:3_[M+H]1+ / PA_43:4_[M+NH4]1+
814.574	PC-O(40:9)_[M+H]1+ / PE-P(40:8)_[M+H]1+	Glycerophospholipids (GP)	Glycerophosphocholines	Phosphatidylcholines (PC)	positive	[M+H]+ / [M+H]+	No	PC-O_40:9_[M+H]1+ / PC-P_40:8_[M+H]1+
814.632	PC(38:2)_[M+H]1+ / PE(41:2)_[M+H]1+	Glycerophospholipids (GP)	Glycerophosphocholines	Phosphatidylcholines (PC)	positive	[M+H]+ / [M+H]+	Yes	PC_38:2_[M+H]1+ / PE_41:2_[M+H]1+
816.684	PC-O(39:1)_[M+H]1+ / PE-P(39:0)_[M+H]1+	Glycerophospholipids (GP)	Glycerophosphocholines	Phosphatidylcholines (PC)	positive	[M+H]+ / [M+H]+	No	PC-O_39:1_[M+H]1+ / PC-P_39:0_[M+H]1+
817.575	PA(45:6)_[M-H]1-	Glycerophospholipids (GP)	Glycerophosphates	Phosphatidates (PA)	negative	[M-H]-	No	PA_45:6_[M-H]1-
818.591	PC(34:1)_[M+OAc]1- / PS(38:0)_[M-H]1-	Glycerophospholipids (GP)	Glycerophosphocholines	Phosphatidylcholines (PC)	negative	[M+OAc]- / [M-H]-	Yes	PC_34:1_[M+OAc]1- / PS_38:0_[M-H]1-
818.606	PC-O(40:7)_[M+H]1+ / PC-P(40:6)_[M+H]1+	Glycerophospholipids (GP)	Glycerophosphocholines	Phosphatidylcholines (PC)	positive	[M+H]+ / [M+H]+	Yes	PC-P_40:6_[M+H]1+
818.724	TG(48:3)_[M+NH4]1+	Glycerolipids (GL)	Triradylglycerols	Triacylglycerols (TG)	positive	[M+NH4]+	Yes	TG_48:3_[M+NH4]1+
819.591	PA(45:5)_[M-H]1-	Glycerophospholipids (GP)	Glycerophosphates	Phosphatidates (PA)	negative	[M-H]-	No	PA_45:5_[M-H]1-
820.607	PE(37:0)_[M+OAc]1- / PC(34:0)_[M+OAc]1-	Glycerophospholipids (GP)	Glycerophosphoethanolamines	Phosphatidylethanolamines (PE)	negative	[M+OAc]- / [M+OAc]-	No	PE_37:0_[M+OAc]1- / PC_34:0_[M+OAc]1-
820.621	PC-O(40:6)_[M+H]1+ / PC-P(40:5)_[M+H]1+	Glycerophospholipids (GP)	Glycerophosphocholines	Phosphatidylcholines (PC)	positive	[M+H]+ / [M+H]+	Yes	PC-O_40:6_[M+H]1+ / PC-P_40:5_[M+H]1+
820.739	TG(48:2)_[M+NH4]1+	Glycerolipids (GL)	Triradylglycerols	Triacylglycerols (TG)	positive	[M+NH4]+	Yes	TG_48:2_[M+NH4]1+
821.606	PA(45:4)_[M-H]1-	Glycerophospholipids (GP)	Glycerophosphates	Phosphatidates (PA)	negative	[M-H]-	No	PA_45:4_[M-H]1-
822.529	PC(35:6)_[M+OAc]1- / PS(39:5)_[M-H]1-	Glycerophospholipids (GP)	Glycerophosphocholines	Phosphatidylcholines (PC)	negative	[M+OAc]- / [M-H]-	Yes	PC_35:6_[M+OAc]1- / PS_39:5_[M-H]1-
822.637	PC-O(40:5)_[M+H]1+ / PC-P(40:4)_[M+H]1+	Glycerophospholipids (GP)	Glycerophosphocholines	Phosphatidylcholines (PC)	positive	[M+H]+ / [M+H]+	Yes	PC-O_40:5_[M+H]1+ / PC-P_40:4_[M+H]1+
822.755	TG(48:1)_[M+NH4]1+	Glycerolipids (GL)	Triradylglycerols	Triacylglycerols (TG)	positive	[M+NH4]+	Yes	TG_48:1_[M+NH4]1+
823.534	PI(33:0)_[M-H]1-	Glycerophospholipids (GP)	Glycerophosphoinositols	Phosphatidylinositols (PI)	negative	[M-H]-	Yes	PI_33:0_[M-H]1-
824.771	TG(48:0)_[M+NH4]1+	Glycerolipids (GL)	Triradylglycerols	Triacylglycerols (TG)	positive	[M+NH4]+	Yes	TG_48:0_[M+NH4]1+
825.592	SM(44:9)_[M+H]1-	Sphingolipids (SP)	Phosphosphingolipids	Sphingomyelins (SM)	negative	[M+H]-	No	SM_44:9_[M-H]1-
830.569	PC(40:8)_[M+H]1+	Glycerophospholipids (GP)	Glycerophosphocholines	Phosphatidylcholines (PC)	positive	[M+H]+	No	PC_40:8_[M+H]1+
832.535	PS(35:2) _[M+OAc]1-	Glycerophospholipids (GP)	Glycerophosphoserines	Phosphatidylserines (PS)	negative	[M+OAc]-	No	PS_35:2_[M+OAc]1-
832.739	TG(49:3)_[M+NH4]1+	Glycerolipids (GL)	Triradylglycerols	Triacylglycerols (TG)	positive	[M+NH4]+	Yes	TG_49:3_[M+NH4]1+
833.519	PI(34:2)_[M-H]1-	Glycerophospholipids (GP)	Glycerophosphoinositols	Phosphatidylinositols (PI)	negative	[M-H]-	Yes	PI_34:2_[M-H]1-
834.601	PC(40:6)_[M+H]1+ / PE(43:6)_[M+H]1+	Glycerophospholipids (GP)	Glycerophosphocholines	Phosphatidylcholines (PC)	positive	[M+H]+ / [M+H]+	Yes	PC_40:6_[M+H]1+ / PE_43:6_[M+H]1+
834.755	TG(49:2)_[M+NH4]1+	Glycerolipids (GL)	Triradylglycerols	Triacylglycerols (TG)	positive	[M+NH4]+	Yes	TG_49:2_[M+NH4]1+
835.534	PI(34:1)_[M-H]1-	Glycerophospholipids (GP)	Glycerophosphoinositols	Phosphatidylinositols (PI)	negative	[M-H]-	Yes	PI_34:1_[M-H]1-
835.597	SM(40:6)_[M+OAc]1-	Sphingolipids (SP)	Phosphosphingolipids	Sphingomyelins (SM)	negative	[M+OAc]-	No	SM_40:6_[M+OAc]1-
836.616	PC(40:5)_[M+H]1+	Glycerophospholipids (GP)	Glycerophosphocholines	Phosphatidylcholines (PC)	positive	[M+H]+	Yes	PC_40:5_[M+H]1+
836.77	TG(49:1)_[M+NH4]1+	Glycerolipids (GL)	Triradylglycerols	Triacylglycerols (TG)	positive	[M+NH4]+	Yes	TG_49:1_[M+NH4]1+
837.55	PI(34:0)_[M-H]1-	Glycerophospholipids (GP)	Glycerophosphoinositols	Phosphatidylinositols (PI)	negative	[M-H]-	No	PI_34:0_[M-H]1-
838.56	PC(36:5)_[M+OAc]1- / PS(40:4)_[M-H]1-	Glycerophospholipids (GP)	Glycerophosphocholines	Phosphatidylcholines (PC)	negative	[M+OAc]- / [M-H]-	Yes	PC_36:5_[M+OAc]1- / PS_40:4_[M-H]1-
838.574	PC-O(42:11)_[M+H]1+ / PC-P(42:10)_[M+H]1+	Glycerophospholipids (GP)	Glycerophosphocholines	Phosphatidylcholines (PC)	positive	[M+H]+ / [M+H]+	No	PC-O_42:11_[M+H]1+ / PC-P_42:10_[M+H]1+
841.644	SM(40:3)_[M+OAc]1-	Sphingolipids (SP)	Phosphosphingolipids	Sphingomyelins (SM)	negative	[M+OAc]-	Yes	SM_40:3_[M+OAc]1-
842.592	PC(36:3)_[M+OAc]1- / PS(40:2)_[M-H]1-	Glycerophospholipids (GP)	Glycerophosphocholines	Phosphatidylcholines (PC)	negative	[M+OAc]- / [M-H]-	Yes	PC_36:3_[M+OAc]1- / PS_40:2_[M-H]1-
842.664	PC(40:1)_[M-H]1-	Glycerophospholipids (GP)	Glycerophosphocholines	Phosphatidylcholines (PC)	negative	[M-H]-	No	PC_40:1_[M-H]1-
844.607	PC(36:2)_[M+OAc]1- / PS(40:1)_[M-H]1-	Glycerophospholipids (GP)	Glycerophosphocholines	Phosphatidylcholines (PC)	negative	[M+OAc]- / [M-H]-	Yes	PC_36:2_[M+OAc]1- / PS_40:1_[M-H]1-
844.739	TG(50:4)_[M+NH4]1+	Glycerolipids (GL)	Triradylglycerols	Triacylglycerols (TG)	positive	[M+NH4]+	Yes	TG_50:4_[M+NH4]1+
846.755	TG(50:3)_[M+NH4]1+	Glycerolipids (GL)	Triradylglycerols	Triacylglycerols (TG)	positive	[M+NH4]+	Yes	TG_50:3_[M+NH4]1+
847.534	PI(35:2)_[M-H]1-	Glycerophospholipids (GP)	Glycerophosphoinositols	Phosphatidylinositols (PI)	negative	[M-H]-	Yes	PI_35:2_[M-H]1-
847.691	SM(40:0)_[M+OAc]1-	Sphingolipids (SP)	Phosphosphingolipids	Sphingomyelins (SM)	negative	[M+OAc]-	No	SM_40:0_[M+OAc]1-
848.566	PS(36:1) _[M+OAc]1-	Glycerophospholipids (GP)	Glycerophosphoserines	Phosphatidylserines (PS)	negative	[M+OAc]-	No	PS_36:1_[M+OAc]1-
848.639	PC(36:0)_[M+OAc]1-	Glycerophospholipids (GP)	Glycerophosphocholines	Phosphatidylcholines (PC)	negative	[M+OAc]-	Yes	PC_36:0_[M+OAc]1-
848.77	TG(50:2)_[M+NH4]1+	Glycerolipids (GL)	Triradylglycerols	Triacylglycerols (TG)	positive	[M+NH4]+	Yes	TG_50:2_[M+NH4]1+
849.565	PA(43:6)_[M+OAc]1-	Glycerophospholipids (GP)	Glycerophosphates	Phosphatidates (PA)	negative	[M+OAc]-	No	PA_43:6_[M+OAc]1-
850.786	TG(50:1)_[M+NH4]1+	Glycerolipids (GL)	Triradylglycerols	Triacylglycerols (TG)	positive	[M+NH4]+	Yes	TG_50:1_[M+NH4]1+
851.602	PI-O(36:0)_[M-H]1- / PG(37:0)_[M+OAc]1-	Glycerophospholipids (GP)	Glycerophosphoinositols	Phosphatidylinositols (PI)	negative	[M-H]- / [M+OAc]-	Yes	PI-O_36:0_[M-H]1-
852.802	TG(50:0)_[M+NH4]1+	Glycerolipids (GL)	Triradylglycerols	Triacylglycerols (TG)	positive	[M+NH4]+	Yes	TG_50:0_[M+NH4]1+
857.519	PI(36:4)_[M-H]1-	Glycerophospholipids (GP)	Glycerophosphoinositols	Phosphatidylinositols (PI)	negative	[M-H]-	Yes	PI_36:4_[M-H]1-
858.754	TG(51:4)_[M+NH4]1+	Glycerolipids (GL)	Triradylglycerols	Triacylglycerols (TG)	positive	[M+NH4]+	Yes	TG_51:4_[M+NH4]1+
859.534	PI(36:3)_[M-H]1-	Glycerophospholipids (GP)	Glycerophosphoinositols	Phosphatidylinositols (PI)	negative	[M-H]-	Yes	PI_36:3_[M-H]1-
859.597	SM(42:8)_[M+OAc]1-	Sphingolipids (SP)	Phosphosphingolipids	Sphingomyelins (SM)	negative	[M+OAc]-	No	SM_42:8_[M+OAc]1-
860.77	TG(51:3)_[M+NH4]1+	Glycerolipids (GL)	Triradylglycerols	Triacylglycerols (TG)	positive	[M+NH4]+	Yes	TG_51:3_[M+NH4]1+
861.55	PI(36:2)_[M-H]1-	Glycerophospholipids (GP)	Glycerophosphoinositols	Phosphatidylinositols (PI)	negative	[M-H]-	Yes	PI_36:2_[M-H]1-
861.707	SM(41:0)_[M+OAc]1-	Sphingolipids (SP)	Phosphosphingolipids	Sphingomyelins (SM)	negative	[M+OAc]-	No	SM_41:0_[M+OAc]1-
862.786	TG(51:2)_[M+NH4]1+	Glycerolipids (GL)	Triradylglycerols	Triacylglycerols (TG)	positive	[M+NH4]+	Yes	TG_51:2_[M+NH4]1+
863.581	PA(44:6)_[M+OAc]1- / PG(43:6)_[M-H]1-	Glycerophospholipids (GP)	Glycerophosphates	Phosphatidates (PA)	negative	[M+OAc]- / [M-H]-	No	PA_44:6_[M+OAc]1- / PG_43:6_[M-H]1-
864.802	TG(51:1)_[M+NH4]1+	Glycerolipids (GL)	Triradylglycerols	Triacylglycerols (TG)	positive	[M+NH4]+	Yes	TG_51:1_[M+NH4]1+
868.607	PC(38:4)_[M+OAc]1- / PS(42:3)_[M-H]1-	Glycerophospholipids (GP)	Glycerophosphocholines	Phosphatidylcholines (PC)	negative	[M+OAc]- / [M-H]-	Yes	PC_38:4_[M+OAc]1- / PS_42:3_[M-H]1-
868.739	TG(52:6)_[M+NH4]1+	Glycerolipids (GL)	Triradylglycerols	Triacylglycerols (TG)	positive	[M+NH4]+	Yes	TG_52:6_[M+NH4]1+
870.55	PS(38:4) _[M+OAc]1-	Glycerophospholipids (GP)	Glycerophosphoserines	Phosphatidylserines (PS)	negative	[M+OAc]-	No	PS_38:4_[M+OAc]1-
870.623	PC(38:3)_[M+OAc]1- / PS(42:2)_[M-H]1-	Glycerophospholipids (GP)	Glycerophosphocholines	Phosphatidylcholines (PC)	negative	[M+OAc]- / [M-H]-	No	PC_38:3_[M+OAc]1- / PS_42:3_[M-H]1-
870.754	TG(52:5)_[M+NH4]1+	Glycerolipids (GL)	Triradylglycerols	Triacylglycerols (TG)	positive	[M+NH4]+	Yes	TG_52:5_[M+NH4]1+
871.691	SM(42:2)_[M+OAc]1-	Sphingolipids (SP)	Phosphosphingolipids	Sphingomyelins (SM)	negative	[M+OAc]-	Yes	SM_42:2_[M+OAc]1-
872.566	PS(38:3) _[M+OAc]1-	Glycerophospholipids (GP)	Glycerophosphoserines	Phosphatidylserines (PS)	negative	[M+OAc]-	No	PS_38:3_[M+OAc]1-
872.77	TG(52:4)_[M+NH4]1+	Glycerolipids (GL)	Triradylglycerols	Triacylglycerols (TG)	positive	[M+NH4]+	Yes	TG_52:4_[M+NH4]1+
873.707	SM(42:1)_[M+OAc]1-	Sphingolipids (SP)	Phosphosphingolipids	Sphingomyelins (SM)	negative	[M+OAc]-	No	SM_42:1_[M+OAc]1-
874.786	TG(52:3)_[M+NH4]1+	Glycerolipids (GL)	Triradylglycerols	Triacylglycerols (TG)	positive	[M+NH4]+	Yes	TG_52:3_[M+NH4]1+
875.722	SM(42:0)_[M+OAc]1-	Sphingolipids (SP)	Phosphosphingolipids	Sphingomyelins (SM)	negative	[M+OAc]-	No	SM_42:0_[M+OAc]1-
876.597	PS(38:1) _[M+OAc]1-	Glycerophospholipids (GP)	Glycerophosphoserines	Phosphatidylserines (PS)	negative	[M+OAc]-	No	PS_38:1_[M+OAc]1-
876.802	TG(52:2)_[M+NH4]1+	Glycerolipids (GL)	Triradylglycerols	Triacylglycerols (TG)	positive	[M+NH4]+	Yes	TG_52:2_[M+NH4]1+
878.592	PC(39:6)_[M+OAc]1- / PS(43:5)_[M-H]1-	Glycerophospholipids (GP)	Glycerophosphocholines	Phosphatidylcholines (PC)	negative	[M+OAc]- / [M-H]-	Yes	PC_39:6_[M+OAc]1-
878.817	TG(52:1)_[M+NH4]1+	Glycerolipids (GL)	Triradylglycerols	Triacylglycerols (TG)	positive	[M+NH4]+	Yes	TG_52:1_[M+NH4]1+
880.833	TG(52:0)_[M+NH4]1+	Glycerolipids (GL)	Triradylglycerols	Triacylglycerols (TG)	positive	[M+NH4]+	Yes	TG_52:0_[M+NH4]1+
881.519	PI(38:6)_[M-H]1-	Glycerophospholipids (GP)	Glycerophosphoinositols	Phosphatidylinositols (PI)	negative	[M-H]-	No	PI_38:6_[M-H]1-
883.534	PI(38:5)_[M-H]1-	Glycerophospholipids (GP)	Glycerophosphoinositols	Phosphatidylinositols (PI)	negative	[M-H]-	Yes	PI_38:5_[M-H]1-
884.566	PS(39:4) _[M+OAc]1-	Glycerophospholipids (GP)	Glycerophosphoserines	Phosphatidylserines (PS)	negative	[M+OAc]-	No	PS_39:4_[M+OAc]1-
885.55	PI(38:4)_[M-H]1-	Glycerophospholipids (GP)	Glycerophosphoinositols	Phosphatidylinositols (PI)	negative	[M-H]-	Yes	PI_38:4_[M-H]1-
886.786	TG(53:4)_[M+NH4]1+	Glycerolipids (GL)	Triradylglycerols	Triacylglycerols (TG)	positive	[M+NH4]+	Yes	TG_53:4_[M+NH4]1+
888.742	PC(43:0)_[M+H]1+	Glycerophospholipids (GP)	Glycerophosphocholines	Phosphatidylcholines (PC)	positive	[M+H]+	Yes	PC_43:0_[M+H]1+
888.802	TG(53:3)_[M+NH4]1+	Glycerolipids (GL)	Triradylglycerols	Triacylglycerols (TG)	positive	[M+NH4]+	Yes	TG_53:3_[M+NH4]1+
890.592	PC(40:7)_[M+OAc]1- / PS(44:6)_[M-H]1-	Glycerophospholipids (GP)	Glycerophosphocholines	Phosphatidylcholines (PC)	negative	[M+OAc]- / [M-H]-	Yes	PC_40:7_[M+OAc]1- / PS_44:6_[M-H]1-
890.781	TGoxid(52:3)_[M+NH4]1+	Glycerolipids (GL)	Triradylglycerols	Triacylglycerols (TG)	positive	[M+NH4]+	No	TG_oxid_52:3_[M+NH4]1+
890.817	TG(53:2)_[M+NH4]1+	Glycerolipids (GL)	Triradylglycerols	Triacylglycerols (TG)	positive	[M+NH4]+	Yes	TG_53:2_[M+NH4]1+
891.597	PI(38:1)_[M-H]1-	Glycerophospholipids (GP)	Glycerophosphoinositols	Phosphatidylinositols (PI)	negative	[M-H]-	Yes	PI_38:1_[M-H]1-
892.607	PC(40:6)_[M+OAc]1- / PS(44:5)_[M-H]1-	Glycerophospholipids (GP)	Glycerophosphocholines	Phosphatidylcholines (PC)	negative	[M+OAc]- / [M-H]-	Yes	PC_40:6_[M+OAc]1- / PS_44:5_[M-H]1-
894.623	PC(40:5)_[M+OAc]1- / PS(44:4)_[M-H]1-	Glycerophospholipids (GP)	Glycerophosphocholines	Phosphatidylcholines (PC)	negative	[M+OAc]- / [M-H]-	No	PC_40:5_[M+OAc]1- / PS_44:4_[M-H]1-
894.754	TG(54:7)_[M+NH4]1+	Glycerolipids (GL)	Triradylglycerols	Triacylglycerols (TG)	positive	[M+NH4]+	Yes	TG_54:7_[M+NH4]1+
896.566	PS(40:5) _[M+OAc]1-	Glycerophospholipids (GP)	Glycerophosphoserines	Phosphatidylserines (PS)	negative	[M+OAc]-	No	PS_40:5_[M+OAc]1-
896.639	PC(40:4)_[M+OAc]1- / PS(44:3)_[M-H]1-	Glycerophospholipids (GP)	Glycerophosphocholines	Phosphatidylcholines (PC)	negative	[M+OAc]- / [M-H]-	Yes	PC_40:4_[M+OAc]1- / PS_44:3_[M-H]1-
896.77	TG(54:6)_[M+NH4]1+	Glycerolipids (GL)	Triradylglycerols	Triacylglycerols (TG)	positive	[M+NH4]+	Yes	TG_54:6_[M+NH4]1+
898.582	PS(40:4) _[M+OAc]1-	Glycerophospholipids (GP)	Glycerophosphoserines	Phosphatidylserines (PS)	negative	[M+OAc]-	No	PS_40:4_[M+OAc]1-
898.786	TG(54:5)_[M+NH4]1+	Glycerolipids (GL)	Triradylglycerols	Triacylglycerols (TG)	positive	[M+NH4]+	Yes	TG_54:5_[M+NH4]1+
900.597	PS(40:3) _[M+OAc]1-	Glycerophospholipids (GP)	Glycerophosphoserines	Phosphatidylserines (PS)	negative	[M+OAc]-	No	PS_40:3_[M+OAc]1-
900.67	PC(40:4)_[M+OAc]1-	Glycerophospholipids (GP)	Glycerophosphocholines	Phosphatidylcholines (PC)	negative	[M+OAc]-	No	PC_40:2_[M+OAc]1-
900.802	TG(54:4)_[M+NH4]1+	Glycerolipids (GL)	Triradylglycerols	Triacylglycerols (TG)	positive	[M+NH4]+	Yes	TG_54:4_[M+NH4]1+
902.613	PS(40:2) _[M+OAc]1-	Glycerophospholipids (GP)	Glycerophosphoserines	Phosphatidylserines (PS)	negative	[M+OAc]-	No	PS_40:2_[M+OAc]1-
902.817	TG(54:3)_[M+NH4]1+	Glycerolipids (GL)	Triradylglycerols	Triacylglycerols (TG)	positive	[M+NH4]+	Yes	TG_54:3_[M+NH4]1+
904.628	PS(40:1)_[M+OAc]1-	Glycerophospholipids (GP)	Glycerophosphoserines	Phosphatidylserines (PS)	negative	[M+OAc]-	No	PS_40:1_[M+OAc]1-
904.739	TG(55:9)_[M+NH4]1+	Glycerolipids (GL)	Triradylglycerols	Triacylglycerols (TG)	positive	[M+NH4]+	Yes	TG_55:9_[M+NH4]1+
904.796	TGoxid(53:3)_[M+NH4]1+	Glycerolipids (GL)	Triradylglycerols	Triacylglycerols (TG)	positive	[M+NH4]+	No	TG_oxid_53:3_[M+NH4]1+
904.833	TG(54:2)_[M+NH4]1+	Glycerolipids (GL)	Triradylglycerols	Triacylglycerols (TG)	positive	[M+NH4]+	Yes	TG_54:2_[M+NH4]1+
906.754	TG(55:8)_[M+NH4]1+	Glycerolipids (GL)	Triradylglycerols	Triacylglycerols (TG)	positive	[M+NH4]+	Yes	TG_55:8_[M+NH4]1+
909.55	PI(40:6)_[M-H]1-	Glycerophospholipids (GP)	Glycerophosphoinositols	Phosphatidylinositols (PI)	negative	[M-H]-	Yes	PI_40:6_[M-H]1-
910.582	PS(41:5)_[M+OAc]1-	Glycerophospholipids (GP)	Glycerophosphoserines	Phosphatidylserines (PS)	negative	[M+OAc]-	No	PS_41:5_[M+OAc]1-
911.566	PI(40:5)_[M-H]1-	Glycerophospholipids (GP)	Glycerophosphoinositols	Phosphatidylinositols (PI)	negative	[M-H]-	No	PI_40:5_[M-H]1-
912.597	PS(41:4)_[M+OAc]1-	Glycerophospholipids (GP)	Glycerophosphoserines	Phosphatidylserines (PS)	negative	[M+OAc]-	No	PS_41:4_[M+OAc]1-
912.778	PC-O(46:2)_[M+H]1+ / PC-P(46:1)_[M+H]1+	Glycerophospholipids (GP)	Glycerophosphocholines	Phosphatidylcholines (PC)	positive	[M+H]+ / [M+H]+	No	PC-O_46:2_[M+H]1+ / PC-P_46:1_[M+H]1+
914.758	PC(45:0)_[M-H]1-	Glycerophospholipids (GP)	Glycerophosphocholines	Phosphatidylcholines (PC)	negative	[M-H]-	No	PC_45:0_[M-H]1-
914.794	PC-O(46:1)_[M+H]1+ / PC-P(46:0)_[M+H]1+	Glycerophospholipids (GP)	Glycerophosphocholines	Phosphatidylcholines (PC)	positive	[M+H]+ / [M+H]+	No	PC-O_46:1_[M+H]1+ / PC-P_46:0_[M+H]1+
918.55	PS(42:8)_[M+OAc]1-	Glycerophospholipids (GP)	Glycerophosphoserines	Phosphatidylserines (PS)	negative	[M+OAc]-	No	PS_42:8_[M+OAc]1-
920.566	PS(42:7)_[M+OAc]1-	Glycerophospholipids (GP)	Glycerophosphoserines	Phosphatidylserines (PS)	negative	[M+OAc]-	No	PS_42:7_[M+OAc]1-
922.654	PC(42:5)_[M+OAc]1-	Glycerophospholipids (GP)	Glycerophosphocholines	Phosphatidylcholines (PC)	negative	[M+OAc]-	No	PC_42:5_[M+OAc]1-
922.785	TG(56:7)_[M+NH4]1+	Glycerolipids (GL)	Triradylglycerols	Triacylglycerols (TG)	positive	[M+NH4]+	Yes	TG_56:7_[M+NH4]1+
923.587	PI(36:1)_[M+OAc]1-	Glycerophospholipids (GP)	Glycerophosphoinositols	Phosphatidylinositols (PI)	negative	[M+OAc]-	No	PI_36:1_[M+OAc]1-
924.597	PS(42:5)_[M+OAc]1-	Glycerophospholipids (GP)	Glycerophosphoserines	Phosphatidylserines (PS)	negative	[M+OAc]-	No	PS_42:5_[M+OAc]1-
924.67	PC(42:4)_[M+OAc]1-	Glycerophospholipids (GP)	Glycerophosphocholines	Phosphatidylcholines (PC)	negative	[M+OAc]-	Yes	PC_42:4_[M+OAc]1-
924.801	TG(56:6)_[M+NH4]1+	Glycerolipids (GL)	Triradylglycerols	Triacylglycerols (TG)	positive	[M+NH4]+	Yes	TG_56:6_[M+NH4]1+
925.602	PI(36:0)_[M+OAc]1-	Glycerophospholipids (GP)	Glycerophosphoinositols	Phosphatidylinositols (PI)	negative	[M+OAc]-	No	PI_36:0_[M+OAc]1-
926.613	PS(42:4)_[M+OAc]1-	Glycerophospholipids (GP)	Glycerophosphoserines	Phosphatidylserines (PS)	negative	[M+OAc]-	No	PS_42:4_[M+OAc]1-
926.817	TG(56:5)_[M+NH4]1+	Glycerolipids (GL)	Triradylglycerols	Triacylglycerols (TG)	positive	[M+NH4]+	Yes	TG_56:5_[M+NH4]1+
928.739	TG(57:11)_[M+NH4]1+	Glycerolipids (GL)	Triradylglycerols	Triacylglycerols (TG)	positive	[M+NH4]+	Yes	TG_57:11_[M+NH4]1+
928.833	TG(56:4)_[M+NH4]1+	Glycerolipids (GL)	Triradylglycerols	Triacylglycerols (TG)	positive	[M+NH4]+	Yes	TG_56:4_[M+NH4]1+
930.754	TG(57:10)_[M+NH4]1+	Glycerolipids (GL)	Triradylglycerols	Triacylglycerols (TG)	positive	[M+NH4]+	Yes	TG_57:10_[M+NH4]1+
930.848	TG(56:3)_[M+NH4]1+	Glycerolipids (GL)	Triradylglycerols	Triacylglycerols (TG)	positive	[M+NH4]+	No	TG_56:3_[M+NH4]1+
932.77	TG(57:9)_[M+NH4]1+	Glycerolipids (GL)	Triradylglycerols	Triacylglycerols (TG)	positive	[M+NH4]+	Yes	TG_57:9_[M+NH4]1+
932.864	TG(56:2)_[M+NH4]1+	Glycerolipids (GL)	Triradylglycerols	Triacylglycerols (TG)	positive	[M+NH4]+	No	TG_56:2_[M+NH4]1+
933.55	PI(42:8)_[M-H]1-	Glycerophospholipids (GP)	Glycerophosphoinositols	Phosphatidylinositols (PI)	negative	[M-H]-	No	PI_42:8_[M-H]1-
936.765	TGoxid(56:8)_[M+NH4]1+	Glycerolipids (GL)	Triradylglycerols	Triacylglycerols (TG)	positive	[M+NH4]+	No	TG_oxid_56:8_[M+NH4]1+
944.732	PC(43:1)_[M+OAc]1-	Glycerophospholipids (GP)	Glycerophosphocholines	Phosphatidylcholines (PC)	negative	[M+OAc]-	Yes	PC_43:1_[M+OAc]1-
946.785	TG(58:9)_[M+NH4]1+	Glycerolipids (GL)	Triradylglycerols	Triacylglycerols (TG)	positive	[M+NH4]+	Yes	TG_58:9_[M+NH4]1+
947.587	PI(38:3)_[M+OAc]1-	Glycerophospholipids (GP)	Glycerophosphoinositols	Phosphatidylinositols (PI)	negative	[M+OAc]-	No	PI_38:3_[M+OAc]1-
950.613	PS(44:6)_[M+OAc]1-	Glycerophospholipids (GP)	Glycerophosphoserines	Phosphatidylserines (PS)	negative	[M+OAc]-	No	PS_44:6_[M+OAc]1-
953.634	PI(38:0)_[M+OAc]1-	Glycerophospholipids (GP)	Glycerophosphoinositols	Phosphatidylinositols (PI)	negative	[M+OAc]-	No	PI_38:0_[M+OAc]1-
954.754	TG(59:12)_[M+NH4]1+	Glycerolipids (GL)	Triradylglycerols	Triacylglycerols (TG)	positive	[M+NH4]+	Yes	TG_59:12_[M+NH4]1+
956.769	TG(59:11)_[M+NH4]1+	Glycerolipids (GL)	Triradylglycerols	Triacylglycerols (TG)	positive	[M+NH4]+	Yes	TG_59:11_[M+NH4]1+
967.555	PI(40:7)_[M+OAc]1-	Glycerophospholipids (GP)	Glycerophosphoinositols	Phosphatidylinositols (PI)	negative	[M+OAc]-	No	PI_40:7_[M+OAc]1-

## Sheet: S2
Table S2. Lipids measured in INTERVAL
Lipid m/z	Lipid name	Lipid category	Lipid main class	Lipid subclass	Ionisation mode	Adduct	Measured in PROMIS
197.155	FA(12:1)_[M-H]1-	Fatty acyls (FA)	Fatty acids and conjugates	Free fatty acids (FA)	negative	[M-H]-	No
209.118	OCT(C12H18O3)_jasmonic acid_[M-H]1-	Fatty acyls (FA)	Octadecanoids	Jasmonic acids (JA)	negative	[M-H]-	No
211.134	OCT(C12H20O3)_dihydrojasmonic_acid_[M-H]1-	Fatty acyls (FA)	Octadecanoids	Jasmonic acids (JA)	negative	[M-H]-	No
223.134	OCT(C13H20O3)_methyl_jasmonate_[M-H]1-	Fatty acyls (FA)	Octadecanoids	Jasmonic acids (JA)	negative	[M-H]-	No
225.113	OCT(C12H18O4)_[M-H]1-	Fatty acyls (FA)	Octadecanoids	Jasmonic acids (JA)	negative	[M-H]-	No
225.186	FA(14:1)_[M-H]1-	Fatty acyls (FA)	Fatty acids and conjugates	Free fatty acids (FA)	negative	[M-H]-	No
227.202	FA(14:0)_[M-H]1-	Fatty acyls (FA)	Fatty acids and conjugates	Free fatty acids (FA)	negative	[M-H]-	Yes
241.217	FA(15:0)_[M-H]1-	Fatty acyls (FA)	Fatty acids and conjugates	Free fatty acids (FA)	negative	[M-H]-	Yes
249.186	FA(16:3)_[M-H]1-	Fatty acyls (FA)	Fatty acids and conjugates	Free fatty acids (FA)	negative	[M-H]-	No
251.202	FA(16:2)_[M-H]1-	Fatty acyls (FA)	Fatty acids and conjugates	Free fatty acids (FA)	negative	[M-H]-	No
253.217	FA(16:1)_[M-H]1-	Fatty acyls (FA)	Fatty acids and conjugates	Free fatty acids (FA)	negative	[M-H]-	Yes
255.233	FA(16:0)_[M-H]1-	Fatty acyls (FA)	Fatty acids and conjugates	Free fatty acids (FA)	negative	[M-H]-	Yes
267.233	FA(17:1)_[M-H]1-	Fatty acyls (FA)	Fatty acids and conjugates	Free fatty acids (FA)	negative	[M-H]-	Yes
269.212	FA(16:1)-OH_[M-H]1-	Fatty acyls (FA)	Fatty acids and conjugates	Free fatty acids (FA)	negative	[M-H]-	No
269.249	FA(17:0)_[M-H]1-	Fatty acyls (FA)	Fatty acids and conjugates	Free fatty acids (FA)	negative	[M-H]-	Yes
271.228	FA(16:0)-OH_[M-H]1-	Fatty acyls (FA)	Fatty acids and conjugates	Free fatty acids (FA)	negative	[M-H]-	No
275.202	FA(18:4)_[M-H]1-	Fatty acyls (FA)	Fatty acids and conjugates	Free fatty acids (FA)	negative	[M-H]-	No
277.217	FA(18:3)_[M-H]1-	Fatty acyls (FA)	Fatty acids and conjugates	Free fatty acids (FA)	negative	[M-H]-	Yes
279.233	FA(18:2)_[M-H]1-	Fatty acyls (FA)	Fatty acids and conjugates	Free fatty acids (FA)	negative	[M-H]-	Yes
281.249	FA(18:1)_[M-H]1-	Fatty acyls (FA)	Fatty acids and conjugates	Free fatty acids (FA)	negative	[M-H]-	Yes
283.264	FA(18:0)_[M-H]1-	Fatty acyls (FA)	Fatty acids and conjugates	Free fatty acids (FA)	negative	[M-H]-	Yes
289.181	OCT(C18H26O3)_[M-H]1-	Fatty acyls (FA)	Octadecanoids	Other octadecanoids (OCT)	negative	[M-H]-	No
293.212	OCT(C18H30O3)_[M-H]1-	Fatty acyls (FA)	Octadecanoids	Other octadecanoids (OCT)	negative	[M-H]-	No
295.228	FA(18:2)-OH_[M-H]1-	Fatty acyls (FA)	Fatty acids and conjugates	Free fatty acids (FA)	negative	[M-H]-	No
295.264	FA(19:1)_[M-H]1-	Fatty acyls (FA)	Fatty acids and conjugates	Free fatty acids (FA)	negative	[M-H]-	No
297.243	FA(18:1)-OH_[M-H]1-	Fatty acyls (FA)	Fatty acids and conjugates	Free fatty acids (FA)	negative	[M-H]-	No
297.28	FA(19:0)_[M-H]1-	Fatty acyls (FA)	Fatty acids and conjugates	Free fatty acids (FA)	negative	[M-H]-	No
299.259	FA(18:0)-OH_[M-H]1-	Fatty acyls (FA)	Fatty acids and conjugates	Free fatty acids (FA)	negative	[M-H]-	No
303.233	FA(20:4)_[M-H]1-	Fatty acyls (FA)	Fatty acids and conjugates	Free fatty acids (FA)	negative	[M-H]-	Yes
305.249	FA(20:3)_[M-H]1-	Fatty acyls (FA)	Fatty acids and conjugates	Free fatty acids (FA)	negative	[M-H]-	Yes
307.264	FA(20:2)_[M-H]1-	Fatty acyls (FA)	Fatty acids and conjugates	Free fatty acids (FA)	negative	[M-H]-	No
309.207	OCT(C18H30O4)_[M-H]1-	Fatty acyls (FA)	Octadecanoids	Other octadecanoids (OCT)	negative	[M-H]-	No
309.28	FA(20:1)_[M-H]1-	Fatty acyls (FA)	Fatty acids and conjugates	Free fatty acids (FA)	negative	[M-H]-	No
311.223	OCT(C18H32O4)_[M-H]1-	Fatty acyls (FA)	Octadecanoids	Other octadecanoids (OCT)	negative	[M-H]-	No
317.212	EIC(C20H30O3)_[M-H]1-	Fatty acyls (FA)	Eicosanoids	Other eicosanoids (EIC)	negative	[M-H]-	No
319.228	EIC(C20H32O3)_[M-H]1-	Fatty acyls (FA)	Eicosanoids	Epoxyeicosatrienoic acids (EIC)	negative	[M-H]-	No
320.236	EIC(C20H33O3)_[M-H]1-	Fatty acyls (FA)	Eicosanoids	Other eicosanoids (EIC)	negative	[M-H]-	No
327.233	FA(22:6)_[M-H]1-	Fatty acyls (FA)	Fatty acids and conjugates	Free fatty acids (FA)	negative	[M-H]-	Yes
329.233	OCT(C18H34O5)_[M-H]1-	Fatty acyls (FA)	Octadecanoids	Other octadecanoids (OCT)	negative	[M-H]-	No
329.249	FA(22:5)_[M-H]1-	Fatty acyls (FA)	Fatty acids and conjugates	Free fatty acids (FA)	negative	[M-H]-	Yes
331.192	EIC(C20H28O4)_[M-H]1-	Fatty acyls (FA)	Eicosanoids	Prostaglandins (EIC)	negative	[M-H]-	No
331.264	FA(22:4)_[M-H]1-	Fatty acyls (FA)	Fatty acids and conjugates	Free fatty acids (FA)	negative	[M-H]-	Yes
333.28	FA(22:3)_[M-H]1-	Fatty acyls (FA)	Fatty acids and conjugates	Free fatty acids (FA)	negative	[M-H]-	No
339.327	FA(22:0)_[M-H]1-	Fatty acyls (FA)	Fatty acids and conjugates	Free fatty acids (FA)	negative	[M-H]-	Yes
367.336	Hydroxycholesterol_[M+H-2H2O]1+	Sterol lipids (ST)	Sterols	Cholesterol and derivatives (Chol)	positive	[M+H-2H2O]+	Yes
369.352	Cholesterol_[M+H-H2O]1+	Sterol lipids (ST)	Sterols	Cholesterol and derivatives (Chol)	positive	[M+H-H2O]+	Yes
383.331	Oxocholesterol_[M+H-H2O]1+	Sterol lipids (ST)	Sterols	Cholesterol and derivatives (Chol)	positive	[M+H-H2O]+	No
391.285	BA(DCA)_[M-H]1-	Sterol lipids (ST)	Bile acids and derivatives	Bile acids, alcohols, and derivatives (BA)	negative	[M-H]-	No
436.283	LPE-O_16:1_[M-H]1- / LPE-P_16:0_[M-H]1-	Glycerophospholipids (GP)	Glycerophosphoethanolamines	Lysophosphatidylethanolamines (LPE)	negative	[M-H]- / [M-H]-	No
452.278	LPE_16:0_[M-H]1-	Glycerophospholipids (GP)	Glycerophosphoethanolamines	Lysophosphatidylethanolamines (LPE)	negative	[M-H]-	No
464.315	LPE-O_18:1_[M-H]1- / LPE-P_18:0_[M-H]1-	Glycerophospholipids (GP)	Glycerophosphoethanolamines	Lysophosphatidylethanolamines (LPE)	negative	[M-H]- / [M-H]-	No
466.33	LPE-O_18:0_[M-H]1-	Glycerophospholipids (GP)	Glycerophosphoethanolamines	Lysophosphatidylethanolamines (LPE)	negative	[M-H]-	No
476.278	LPE_18:2_[M-H]1-	Glycerophospholipids (GP)	Glycerophosphoethanolamines	Lysophosphatidylethanolamines (LPE)	negative	[M-H]-	No
478.294	LPE_18:1_[M-H]1-	Glycerophospholipids (GP)	Glycerophosphoethanolamines	Lysophosphatidylethanolamines (LPE)	negative	[M-H]-	No
478.329	LPE-P_19:1_[M+H]1+	Glycerophospholipids (GP)	Glycerophosphoethanolamines	Lysophosphatidylethanolamines (LPE)	positive	[M+H]+	No
480.31	LPE_18:0_[M-H]1-	Glycerophospholipids (GP)	Glycerophosphoethanolamines	Lysophosphatidylethanolamines (LPE)	negative	[M-H]-	No
480.345	LPC-O_16:1_[M+H]1+ / LPC-P_16:0_[M+H]1+	Glycerophospholipids (GP)	Glycerophosphocholines	Lysophosphatidylcholines (LPC)	positive	[M+H]+ / [M+H]+	No
482.361	LPC-2O_16:0_[M+H]1+	Glycerophospholipids (GP)	Glycerophosphocholines	Lysophosphatidylcholines (LPC)	positive	[M+H]+	No
492.346	LPE-P_20:0_[M-H]1-	Glycerophospholipids (GP)	Glycerophosphoethanolamines	Lysophosphatidylethanolamines (LPE)	negative	[M-H]-	No
494.324	LPC_16:1_[M+H]1+ / LPE_19:1_[M+H]1+	Glycerophospholipids (GP)	Glycerophosphocholines	Lysophosphatidylcholines (LPC)	positive	[M+H]+ / [M+H]+	Yes
494.325	LPE_19:0_[M-H]1-	Glycerophospholipids (GP)	Glycerophosphoethanolamines	Lysophosphatidylethanolamines (LPE)	negative	[M-H]-	No
495.441	DG_28:0_[M+H-H2O]1+	Glycerolipids (GL)	Diradylglycerols	Diacylglycerols (DG)	positive	[M+H-H2O]+	No
496.34	LPC_16:0_[M+H]1+ / LPE_19:0_[M+H]1+	Glycerophospholipids (GP)	Glycerophosphocholines	Lysophosphatidylcholines (LPC)	positive	[M+H]+ / [M+H]+	Yes
500.278	LPE_20:4_[M-H]1-	Glycerophospholipids (GP)	Glycerophosphoethanolamines	Lysophosphatidylethanolamines (LPE)	negative	[M-H]-	No
504.31	LPE_20:2_[M-H]1-	Glycerophospholipids (GP)	Glycerophosphoethanolamines	Lysophosphatidylethanolamines (LPE)	negative	[M-H]-	No
506.324	LPC_17:2_[M+H]1+ / LPE_20:2_[M+H]1+	Glycerophospholipids (GP)	Glycerophosphocholines	Lysophosphatidylcholines (LPC)	positive	[M+H]+ / [M+H]+	No
506.325	LPE_20:1_[M-H]1-	Glycerophospholipids (GP)	Glycerophosphoethanolamines	Lysophosphatidylethanolamines (LPE)	negative	[M-H]-	No
506.361	LPC-O_18:2_[M+H]1+ / LPC-P_18:1_[M+H]1+	Glycerophospholipids (GP)	Glycerophosphocholines	Lysophosphatidylcholines (LPC)	positive	[M+H]+ / [M+H]+	No
508.341	LPE_20:0_[M-H]1-	Glycerophospholipids (GP)	Glycerophosphoethanolamines	Lysophosphatidylethanolamines (LPE)	negative	[M-H]-	No
508.376	LPC-O_18:1_[M+H]1+ / LPC-P_18:0_[M+H]1+	Glycerophospholipids (GP)	Glycerophosphocholines	Lysophosphatidylcholines (LPC)	positive	[M+H]+ / [M+H]+	No
510.355	LPC_17:0_[M+H]1+ / LPE_20:0_[M+H]1+	Glycerophospholipids (GP)	Glycerophosphocholines	Lysophosphatidylcholines (LPC)	positive	[M+H]+ / [M+H]+	Yes
510.392	LPC-2O_18:0_[M+H]1+	Glycerophospholipids (GP)	Glycerophosphocholines	Lysophosphatidylcholines (LPC)	positive	[M+H]+	No
518.324	LPC_18:3_[M+H]1+	Glycerophospholipids (GP)	Glycerophosphocholines	Lysophosphatidylcholines (LPC)	positive	[M+H]+	No
521.456	DG_30:1_[M+H-H2O]1+	Glycerolipids (GL)	Diradylglycerols	Diacylglycerols (DG)	positive	[M+H-H2O]+	Yes
522.355	PC-O_18:1_[M+H]1+ / PC-P_18:0_[M+H]1+	Glycerophospholipids (GP)	Glycerophosphocholines	Phosphatidylcholines (PC)	positive	[M+H]+ / [M+H]+	No
523.472	DG_30:0_[M+H-H2O]1+	Glycerolipids (GL)	Diradylglycerols	Diacylglycerols (DG)	positive	[M+H-H2O]+	Yes
524.278	LPE_22:6_[M-H]1-	Glycerophospholipids (GP)	Glycerophosphoethanolamines	Lysophosphatidylethanolamines (LPE)	negative	[M-H]-	No
524.371	PC-O_18:0_[M+H]1+ / LPE_21:0_[M+H]1+	Glycerophospholipids (GP)	Glycerophosphocholines	Phosphatidylcholines (PC)	positive	[M+H]+ / [M+H]+	No
528.31	LPE_22:4_[M-H]1-	Glycerophospholipids (GP)	Glycerophosphoethanolamines	Lysophosphatidylethanolamines (LPE)	negative	[M-H]-	No
540.331	LPC_15:0_[M+OAc]1-	Glycerophospholipids (GP)	Glycerophosphocholines	Lysophosphatidylcholines (LPC)	negative	[M+OAc]-	No
544.34	LPC_20:4_[M+H]1+	Glycerophospholipids (GP)	Glycerophosphocholines	Lysophosphatidylcholines (LPC)	positive	[M+H]+	Yes
546.355	LPC_20:3_[M+H]1+	Glycerophospholipids (GP)	Glycerophosphocholines	Lysophosphatidylcholines (LPC)	positive	[M+H]+	No
547.472	DG_32:2_[M+H-H2O]1+	Glycerolipids (GL)	Diradylglycerols	Diacylglycerols (DG)	positive	[M+H-H2O]+	Yes
551.503	DG_32:0_[M+H-H2O]1+	Glycerolipids (GL)	Diradylglycerols	Diacylglycerols (DG)	positive	[M+H-H2O]+	Yes
554.345	LPS_20:0_[M+H]1+ / LPG_20:2_[M+NH4]1+	Glycerophospholipids (GP)	Glycerophosphoserines	Lysophosphatidylserines (LPS)	positive	[M+H]+ / [M+NH4]+	No
554.346	PC-O_16:0_[M+OAc]1-	Glycerophospholipids (GP)	Glycerophosphocholines	Phosphatidylcholines (PC)	negative	[M+OAc]-	No
559.472	DG_33:3_[M+H-H2O]1+	Glycerolipids (GL)	Diradylglycerols	Diacylglycerols (DG)	positive	[M+H-H2O]+	No
563.503	DG_33:1_[M+H-H2O]1+	Glycerolipids (GL)	Diradylglycerols	Diacylglycerols (DG)	positive	[M+H-H2O]+	No
566.346	LPC_17:1_[M+OAc]1- / LPS_21:0_[M-H]1-	Glycerophospholipids (GP)	Glycerophosphocholines	Lysophosphatidylcholines (LPC)	negative	[M+OAc]- / [M-H]-	No
568.34	LPC_22:6_[M+H]1+	Glycerophospholipids (GP)	Glycerophosphocholines	Lysophosphatidylcholines (LPC)	positive	[M+H]+	No
568.362	PC-O_17:0_[M+OAc]1-	Glycerophospholipids (GP)	Glycerophosphocholines	Phosphatidylcholines (PC)	negative	[M+OAc]-	No
573.488	DG_34:3_[M+H-H2O]1+	Glycerolipids (GL)	Diradylglycerols	Diacylglycerols (DG)	positive	[M+H-H2O]+	Yes
575.503	DG_34:2_[M+H-H2O]1+	Glycerolipids (GL)	Diradylglycerols	Diacylglycerols (DG)	positive	[M+H-H2O]+	Yes
577.519	DG_34:1_[M+H-H2O]1+	Glycerolipids (GL)	Diradylglycerols	Diacylglycerols (DG)	positive	[M+H-H2O]+	Yes
578.346	LPC_18:2_[M+OAc]1- / LPS_22:1_[M-H]1-	Glycerophospholipids (GP)	Glycerophosphocholines	Lysophosphatidylcholines (LPC)	negative	[M+OAc]- / [M-H]-	No
579.535	DG_34:0_[M+H-H2O]1+	Glycerolipids (GL)	Diradylglycerols	Diacylglycerols (DG)	positive	[M+H-H2O]+	Yes
582.378	PC-O_18:0_[M+OAc]1-	Glycerophospholipids (GP)	Glycerophosphocholines	Phosphatidylcholines (PC)	negative	[M+OAc]-	No
584.525	DG_32:1_[M+NH4]1+	Glycerolipids (GL)	Diradylglycerols	Diacylglycerols (DG)	positive	[M+NH4]+	No
592.398	PE_25:0_[M-H]1-	Glycerophospholipids (GP)	Glycerophosphoethanolamines	Phosphatidylethanolamines (PE)	negative	[M-H]-	No
597.488	DG_36:5_[M+H-H2O]1+	Glycerolipids (GL)	Diradylglycerols	Diacylglycerols (DG)	positive	[M+H-H2O]+	Yes
599.503	DG_36:4_[M+H-H2O]1+	Glycerolipids (GL)	Diradylglycerols	Diacylglycerols (DG)	positive	[M+H-H2O]+	Yes
601.519	DG_36:3_[M+H-H2O]1+	Glycerolipids (GL)	Diradylglycerols	Diacylglycerols (DG)	positive	[M+H-H2O]+	Yes
603.535	DG_36:2_[M+H-H2O]1+	Glycerolipids (GL)	Diradylglycerols	Diacylglycerols (DG)	positive	[M+H-H2O]+	Yes
605.55	DG_36:1_[M+H-H2O]1+	Glycerolipids (GL)	Diradylglycerols	Diacylglycerols (DG)	positive	[M+H-H2O]+	Yes
614.587	CE_14:0_[M+NH4]1+	Sterol lipids (ST)	Sterols	Cholesteryl esters (CE)	positive	[M+NH4]+	Yes
620.599	Cer_40:1_[M-H]1-	Sphingolipids (SP)	Ceramides	Ceramides (Cer)	negative	[M-H]-	Yes
623.503	DG_38:6_[M+H-H2O]1+	Glycerolipids (GL)	Diradylglycerols	Diacylglycerols (DG)	positive	[M+H-H2O]+	No
625.519	DG_38:5_[M+H-H2O]1+	Glycerolipids (GL)	Diradylglycerols	Diacylglycerols (DG)	positive	[M+H-H2O]+	No
627.535	DG_38:4_[M+H-H2O]1+	Glycerolipids (GL)	Diradylglycerols	Diacylglycerols (DG)	positive	[M+H-H2O]+	No
628.603	CE_15:0_[M+NH4]1+	Sterol lipids (ST)	Sterols	Cholesteryl esters (CE)	positive	[M+NH4]+	No
629.55	DG_38:3_[M+H-H2O]1+	Glycerolipids (GL)	Diradylglycerols	Diacylglycerols (DG)	positive	[M+H-H2O]+	No
630.618	Cer_42:2_[M+H-H2O]1+	Sphingolipids (SP)	Ceramides	Ceramides (Cer)	positive	[M+H-H2O]+	No
632.634	Cer_42:1_[M+H-H2O]1+	Sphingolipids (SP)	Ceramides	Ceramides (Cer)	positive	[M+H-H2O]+	No
634.614	Cer_41:1_[M-H]1-	Sphingolipids (SP)	Ceramides	Ceramides (Cer)	negative	[M-H]-	Yes
640.603	CE_16:1_[M+NH4]1+	Sterol lipids (ST)	Sterols	Cholesteryl esters (CE)	positive	[M+NH4]+	Yes
642.618	CE_16:0_[M+NH4]1+	Sterol lipids (ST)	Sterols	Cholesteryl esters (CE)	positive	[M+NH4]+	Yes
646.614	Cer_42:2_[M-H]1-	Sphingolipids (SP)	Ceramides	Ceramides (Cer)	negative	[M-H]-	Yes
654.618	CE_17:1_[M+NH4]1+	Sterol lipids (ST)	Sterols	Cholesteryl esters (CE)	positive	[M+NH4]+	Yes
656.634	CE_17:0_[M+NH4]1+	Sterol lipids (ST)	Sterols	Cholesteryl esters (CE)	positive	[M+NH4]+	No
664.603	CE_18:3_[M+NH4]1+	Sterol lipids (ST)	Sterols	Cholesteryl esters (CE)	positive	[M+NH4]+	Yes
666.434	PS_27:0_[M+H]1+	Glycerophospholipids (GP)	Glycerophosphoserines	Phosphatidylserines (PS)	positive	[M+H]+	No
666.618	CE_18:2_[M+NH4]1+	Sterol lipids (ST)	Sterols	Cholesteryl esters (CE)	positive	[M+NH4]+	Yes
668.634	CE_18:1_[M+NH4]1+	Sterol lipids (ST)	Sterols	Cholesteryl esters (CE)	positive	[M+NH4]+	Yes
670.65	CE_18:0_[M+NH4]1+	Sterol lipids (ST)	Sterols	Cholesteryl esters (CE)	positive	[M+NH4]+	Yes
671.466	PA_34:2_[M-H]1-	Glycerophospholipids (GP)	Glycerophosphates	Phosphatidates (PA)	negative	[M-H]-	Yes
673.481	PA_34:1_[M-H]1-	Glycerophospholipids (GP)	Glycerophosphates	Phosphatidates (PA)	negative	[M-H]-	Yes
673.528	SM_32:2_[M+H]1+	Sphingolipids (SP)	Phosphosphingolipids	Sphingomyelins (SM)	positive	[M+H]+	No
675.544	SM_32:1_[M+H]1+	Sphingolipids (SP)	Phosphosphingolipids	Sphingomyelins (SM)	positive	[M+H]+	Yes
677.55	DG_42:7_[M+H-H2O]1+	Glycerolipids (GL)	Diradylglycerols	Diacylglycerols (DG)	positive	[M+H-H2O]+	No
680.619	DG_39:2_[M+NH4]1+	Glycerolipids (GL)	Diradylglycerols	Diacylglycerols (DG)	positive	[M+NH4]+	No
688.603	CE_20:5_[M+NH4]1+	Sterol lipids (ST)	Sterols	Cholesteryl esters (CE)	positive	[M+NH4]+	Yes
689.559	SM_33:1_[M+H]1+	Sphingolipids (SP)	Phosphosphingolipids	Sphingomyelins (SM)	positive	[M+H]+	No
690.543	PC-O_30:1_[M+H]1+ / PC-P_30:0_[M+H]1+ / PE-O_33:1_[M+H]1+	Glycerophospholipids (GP)	Glycerophosphocholines	Phosphatidylcholines (PC)	positive	[M+H]+ / [M+H]+ / [M+H]+	No
690.618	CE_20:4_[M+NH4]1+	Sterol lipids (ST)	Sterols	Cholesteryl esters (CE)	positive	[M+NH4]+	Yes
692.634	CE_20:3_[M+NH4]1+	Sterol lipids (ST)	Sterols	Cholesteryl esters (CE)	positive	[M+NH4]+	Yes
698.513	PE-O_34:3_[M-H]1- / PE-P_34:2_[M-H]1-	Glycerophospholipids (GP)	Glycerophosphoethanolamines	Phosphatidylethanolamines (PE)	negative	[M-H]- / [M-H]-	No
699.497	PA_36:2_[M-H]1-	Glycerophospholipids (GP)	Glycerophosphates	Phosphatidates (PA)	negative	[M-H]-	No
700.529	PE-O_34:2_[M-H]1- / PE-P_34:1_[M-H]1-	Glycerophospholipids (GP)	Glycerophosphoethanolamines	Phosphatidylethanolamines (PE)	negative	[M-H]- / [M-H]-	No
701.559	SM_34:2_[M+H]1+	Sphingolipids (SP)	Phosphosphingolipids	Sphingomyelins (SM)	positive	[M+H]+	Yes
702.508	PC_30:1_[M-H]- / PE_33:1_[M-H]1-	Glycerophospholipids (GP)	Glycerophosphocholines	Phosphatidylcholines (PC)	negative	[M-H]- / [M-H]-	Yes
702.544	PE-O_34:1_[M-H]1- / PE-P_34:0_[M-H]1-	Glycerophospholipids (GP)	Glycerophosphoethanolamines	Phosphatidylethanolamines (PE)	negative	[M-H]- / [M-H]-	Yes
703.575	SM_34:1_[M+H]1+	Sphingolipids (SP)	Phosphosphingolipids	Sphingomyelins (SM)	positive	[M+H]+	Yes
705.582	DG_44:7_[M+H-H2O]1+	Glycerolipids (GL)	Diradylglycerols	Diacylglycerols (DG)	positive	[M+H-H2O]+	No
705.591	SM_34:0_[M+H]1+	Sphingolipids (SP)	Phosphosphingolipids	Sphingomyelins (SM)	positive	[M+H]+	Yes
706.538	PC_30:0_[M+H]1+ / PE_33:0_[M+H]1+ / PA_35:1_[M+NH4]1+	Glycerophospholipids (GP)	Glycerophosphocholines	Phosphatidylcholines (PC)	positive	[M+H]+ / [M+H]+ / [M+NH4]+	No
706.574	PC-O_31:0_[M+H]1+ / PE-O_34:0_[M+H]1+	Glycerophospholipids (GP)	Glycerophosphocholines	Phosphatidylcholines (PC)	positive	[M+H]+ / [M+H]+	No
706.611	PC-2O_32:0_[M+H]1+	Glycerophospholipids (GP)	Glycerophosphocholines	Phosphatidylcholines (PC)	positive	[M+H]+	No
707.597	DG_44:6_[M+H-H2O]1+	Glycerolipids (GL)	Diradylglycerols	Diacylglycerols (DG)	positive	[M+H-H2O]+	Yes
714.508	PE_34:2_[M-H]1-	Glycerophospholipids (GP)	Glycerophosphoethanolamines	Phosphatidylethanolamines (PE)	negative	[M-H]-	Yes
714.618	CE_22:6_[M+NH4]1+	Sterol lipids (ST)	Sterols	Cholesteryl esters (CE)	positive	[M+NH4]+	No
716.523	PC_31:2_[M+H]1+ / PE_34:2_[M+H]1+ / PA_36:3_[M+NH4]1+	Glycerophospholipids (GP)	Glycerophosphocholines	Phosphatidylcholines (PC)	positive	[M+H]+ / [M+H]+ / [M+NH4]+	No
716.524	PE_34:1_[M-H]1-	Glycerophospholipids (GP)	Glycerophosphoethanolamines	Phosphatidylethanolamines (PE)	negative	[M-H]-	Yes
716.634	CE_22:5_[M+NH4]1+	Sterol lipids (ST)	Sterols	Cholesteryl esters (CE)	positive	[M+NH4]+	No
717.591	SM_35:1_[M+H]1+	Sphingolipids (SP)	Phosphosphingolipids	Sphingomyelins (SM)	positive	[M+H]+	No
718.539	PE_34:0_[M-H]1-	Glycerophospholipids (GP)	Glycerophosphoethanolamines	Phosphatidylethanolamines (PE)	negative	[M-H]-	Yes
718.574	PC-O_32:1_[M+H]1+ / PC-P_32:0_[M+H]1+ / PE-O_35:1_[M+H]1+	Glycerophospholipids (GP)	Glycerophosphocholines	Phosphatidylcholines (PC)	positive	[M+H]+ / [M+H]+ / [M+H]+	No
722.513	PE-O_36:5_[M-H]1- / PE-P_36:4_[M-H]1-	Glycerophospholipids (GP)	Glycerophosphoethanolamines	Phosphatidylethanolamines (PE)	negative	[M-H]- / [M-H]-	No
724.529	PE-O_36:4_[M-H]1- / PE-P_36:3_[M-H]1-	Glycerophospholipids (GP)	Glycerophosphoethanolamines	Phosphatidylethanolamines (PE)	negative	[M-H]- / [M-H]-	No
726.544	PE-O_36:3_[M-H]1- / PE-P_36:2_[M-H]1-	Glycerophospholipids (GP)	Glycerophosphoethanolamines	Phosphatidylethanolamines (PE)	negative	[M-H]- / [M-H]-	No
728.524	PE_35:2_[M-H]1-	Glycerophospholipids (GP)	Glycerophosphoethanolamines	Phosphatidylethanolamines (PE)	negative	[M-H]-	Yes
728.559	PC-O_33:3_[M+H]1+ / PC-P_33:2_[M+H]1+ / PE-O_36:3_[M+H]1+	Glycerophospholipids (GP)	Glycerophosphocholines	Phosphatidylcholines (PC)	positive	[M+H]+ / [M+H]+ / [M+H]+	No
728.56	PE-O_36:2_[M-H]1- / PE-P_36:1_[M-H]1-	Glycerophospholipids (GP)	Glycerophosphoethanolamines	Phosphatidylethanolamines (PE)	negative	[M-H]- / [M-H]-	No
729.591	SM_36:2_[M+H]1+	Sphingolipids (SP)	Phosphosphingolipids	Sphingomyelins (SM)	positive	[M+H]+	Yes
730.538	PC_32:2_[M+H]1+ / PE_35:2_[M+H]1+ / PA_37:3_[M+NH4]1+	Glycerophospholipids (GP)	Glycerophosphocholines	Phosphatidylcholines (PC)	positive	[M+H]+ / [M+H]+ / [M+NH4]+	Yes
730.539	PE_35:1_[M-H]1-	Glycerophospholipids (GP)	Glycerophosphoethanolamines	Phosphatidylethanolamines (PE)	negative	[M-H]-	Yes
730.576	PE-O_36:1_[M-H]1- / PE-P_36:0_[M-H]1-	Glycerophospholipids (GP)	Glycerophosphoethanolamines	Phosphatidylethanolamines (PE)	negative	[M-H]- / [M-H]-	No
731.606	SM_36:1_[M+H]1+	Sphingolipids (SP)	Phosphosphingolipids	Sphingomyelins (SM)	positive	[M+H]+	Yes
733.622	SM_36:0_[M+H]1+	Sphingolipids (SP)	Phosphosphingolipids	Sphingomyelins (SM)	positive	[M+H]+	Yes
734.569	PC_32:0_[M+H]1+ / PE_35:0_[M+H]1+ / PA_37:1_[M+NH4]1+	Glycerophospholipids (GP)	Glycerophosphocholines	Phosphatidylcholines (PC)	positive	[M+H]+ / [M+H]+ / [M+NH4]+	Yes
735.554	PG-O_34:0_[M-H]1-	Glycerophospholipids (GP)	Glycerophosphoglycerols	Phosphatidylglycerols (PG)	negative	[M-H]-	No
738.508	PE_36:4_[M-H]1-	Glycerophospholipids (GP)	Glycerophosphoethanolamines	Phosphatidylethanolamines (PE)	negative	[M-H]-	Yes
738.661	TG_42:1_[M+NH4]1+	Glycerolipids (GL)	Triradylglycerols	Triacylglycerols (TG)	positive	[M+NH4]+	No
740.523	PC_33:4_[M+H]1+ / PE_36:4_[M+H]1+ / PA_38:5_[M+NH4]1+	Glycerophospholipids (GP)	Glycerophosphocholines	Phosphatidylcholines (PC)	positive	[M+H]+ / [M+H]+ / [M+NH4]+	Yes
740.524	PE_36:3_[M-H]1-	Glycerophospholipids (GP)	Glycerophosphoethanolamines	Phosphatidylethanolamines (PE)	negative	[M-H]-	Yes
742.539	PE_36:2_[M-H]1-	Glycerophospholipids (GP)	Glycerophosphoethanolamines	Phosphatidylethanolamines (PE)	negative	[M-H]-	Yes
742.574	PC-O_34:3_[M+H]1+ / PC-P_34:2_[M+H]1+ / PE-P_37:2_[M+H]1+	Glycerophospholipids (GP)	Glycerophosphocholines	Phosphatidylcholines (PC)	positive	[M+H]+ / [M+H]+ / [M+H]+	Yes
744.555	PE_36:1_[M-H]1-	Glycerophospholipids (GP)	Glycerophosphoethanolamines	Phosphatidylethanolamines (PE)	negative	[M-H]-	Yes
744.59	PC-O_34:2_[M+H]1+ / PC-P_34:1_[M+H]1+ / PE-O_37:2_[M+H]1+	Glycerophospholipids (GP)	Glycerophosphocholines	Phosphatidylcholines (PC)	positive	[M+H]+ / [M+H]+ / [M+H]+	Yes
745.622	SM_37:1_[M+H]1+	Sphingolipids (SP)	Phosphosphingolipids	Sphingomyelins (SM)	positive	[M+H]+	Yes
746.513	PE-P_38:6_[M-H]1-	Glycerophospholipids (GP)	Glycerophosphoethanolamines	Phosphatidylethanolamines (PE)	negative	[M-H]-	No
746.606	PC-O_34:1_[M+H]1+ / PC-P_34:0_[M+H]1+ / PE-O_37:1_[M+H]1+	Glycerophospholipids (GP)	Glycerophosphocholines	Phosphatidylcholines (PC)	positive	[M+H]+ / [M+H]+ / [M+H]+	Yes
747.518	PG_34:1_[M-H]1-	Glycerophospholipids (GP)	Glycerophosphoglycerols	Phosphatidylglycerols (PG)	negative	[M-H]-	Yes
748.529	PE-O_38:6_[M-H]1- / PE-P_38:5_[M-H]1-	Glycerophospholipids (GP)	Glycerophosphoethanolamines	Phosphatidylethanolamines (PE)	negative	[M-H]- / [M-H]-	No
749.534	PG_34:0_[M-H]1-	Glycerophospholipids (GP)	Glycerophosphoglycerols	Phosphatidylglycerols (PG)	negative	[M-H]-	Yes
750.544	PE-O_38:5_[M-H]1- / PE-P_38:4_[M-H]1-	Glycerophospholipids (GP)	Glycerophosphoethanolamines	Phosphatidylethanolamines (PE)	negative	[M-H]- / [M-H]-	No
752.524	PE_37:4_[M-H]1-	Glycerophospholipids (GP)	Glycerophosphoethanolamines	Phosphatidylethanolamines (PE)	negative	[M-H]-	Yes
752.56	PE-O_38:4_[M-H]1- / PE-P_38:3_[M-H]1-	Glycerophospholipids (GP)	Glycerophosphoethanolamines	Phosphatidylethanolamines (PE)	negative	[M-H]- / [M-H]-	Yes
754.538	PC_34:4_[M+H]1+ / PE_37:4_[M+H]1+ / PA_39:5_[M+NH4]1+	Glycerophospholipids (GP)	Glycerophosphocholines	Phosphatidylcholines (PC)	positive	[M+H]+ / [M+H]+ / [M+NH4]+	Yes
754.539	PE_37:3_[M-H]1-	Glycerophospholipids (GP)	Glycerophosphoethanolamines	Phosphatidylethanolamines (PE)	negative	[M-H]-	No
754.576	PE-O_38:3_[M-H]1- / PE-P_38:2_[M-H]1-	Glycerophospholipids (GP)	Glycerophosphoethanolamines	Phosphatidylethanolamines (PE)	negative	[M-H]- / [M-H]-	No
756.519	PS-P_35:2_[M-H]1-	Glycerophospholipids (GP)	Glycerophosphoserines	Phosphatidylserines (PS)	negative	[M-H]-	No
756.554	PC_34:3_[M+H]1+ / PE_37:3_[M+H]1+ / PA_39:4_[M+NH4]1+	Glycerophospholipids (GP)	Glycerophosphocholines	Phosphatidylcholines (PC)	positive	[M+H]+ / [M+H]+ / [M+NH4]+	Yes
756.555	PE_37:2_[M-H]1-	Glycerophospholipids (GP)	Glycerophosphoethanolamines	Phosphatidylethanolamines (PE)	negative	[M-H]-	Yes
756.591	PE-O_38:2_[M-H]1- / PE-P_38:1_[M-H]1-	Glycerophospholipids (GP)	Glycerophosphoethanolamines	Phosphatidylethanolamines (PE)	negative	[M-H]- / [M-H]-	No
757.503	PG_35:3_[M-H]1-	Glycerophospholipids (GP)	Glycerophosphoglycerols	Phosphatidylglycerols (PG)	negative	[M-H]-	Yes
757.622	SM_38:2_[M+H]1+	Sphingolipids (SP)	Phosphosphingolipids	Sphingomyelins (SM)	positive	[M+H]+	No
758.534	PS-O_35:2_[M-H]1-	Glycerophospholipids (GP)	Glycerophosphoserines	Phosphatidylserines (PS)	negative	[M-H]-	No
758.569	PC_34:2_[M+H]1+ / PE_37:2_[M+H]1+ / PA_39:3_[M+NH4]1+	Glycerophospholipids (GP)	Glycerophosphocholines	Phosphatidylcholines (PC)	positive	[M+H]+ / [M+H]+ / [M+NH4]+	Yes
758.571	PE_37:1_[M-H]1-	Glycerophospholipids (GP)	Glycerophosphoethanolamines	Phosphatidylethanolamines (PE)	negative	[M-H]-	Yes
759.638	SM_38:1_[M+H]1+	Sphingolipids (SP)	Phosphosphingolipids	Sphingomyelins (SM)	positive	[M+H]+	Yes
760.585	PC_34:1_[M+H]1+ / PE_37:1_[M+H]1+ / PA_39:2_[M+NH4]1+	Glycerophospholipids (GP)	Glycerophosphocholines	Phosphatidylcholines (PC)	positive	[M+H]+ / [M+H]+ / [M+NH4]+	Yes
762.508	PE_38:6_[M-H]1-	Glycerophospholipids (GP)	Glycerophosphoethanolamines	Phosphatidylethanolamines (PE)	negative	[M-H]-	Yes
762.601	PC_34:0_[M+H]1+ / PE_37:0_[M+H]1+ / PA_39:1_[M+NH4]1+	Glycerophospholipids (GP)	Glycerophosphocholines	Phosphatidylcholines (PC)	positive	[M+H]+ / [M+H]+ / [M+NH4]+	Yes
764.523	PC_35:6_[M+H]1+ / PE_38:6_[M+H]1+ / PA_40:7_[M+NH4]1+	Glycerophospholipids (GP)	Glycerophosphocholines	Phosphatidylcholines (PC)	positive	[M+H]+ / [M+H]+ / [M+NH4]+	No
764.524	PE_38:5_[M-H]1-	Glycerophospholipids (GP)	Glycerophosphoethanolamines	Phosphatidylethanolamines (PE)	negative	[M-H]-	Yes
764.676	TG_44:2_[M+NH4]1+	Glycerolipids (GL)	Triradylglycerols	Triacylglycerols (TG)	positive	[M+NH4]+	No
766.539	PE_38:4_[M-H]1-	Glycerophospholipids (GP)	Glycerophosphoethanolamines	Phosphatidylethanolamines (PE)	negative	[M-H]-	Yes
766.574	PC-O_36:5_[M+H]1+ / PC-P_36:4_[M+H]1+	Glycerophospholipids (GP)	Glycerophosphocholines	Phosphatidylcholines (PC)	positive	[M+H]+ / [M+H]+	Yes
766.692	TG_44:1_[M+NH4]1+	Glycerolipids (GL)	Triradylglycerols	Triacylglycerols (TG)	positive	[M+NH4]+	Yes
768.554	PC_35:4_[M+H]1+ / PE_38:4_[M+H]1+ / PA_40:5_[M+NH4]1+	Glycerophospholipids (GP)	Glycerophosphocholines	Phosphatidylcholines (PC)	positive	[M+H]+ / [M+H]+ / [M+NH4]+	Yes
768.555	PE_38:3_[M-H]1-	Glycerophospholipids (GP)	Glycerophosphoethanolamines	Phosphatidylethanolamines (PE)	negative	[M-H]-	Yes
768.59	PC-O_36:4_[M+H]1+ / PC-P_36:3_[M+H]1+	Glycerophospholipids (GP)	Glycerophosphocholines	Phosphatidylcholines (PC)	positive	[M+H]+ / [M+H]+	Yes
770.569	PC_35:3_[M+H]1+ / PE_38:3_[M+H]1+ / PA_40:4_[M+NH4]1+	Glycerophospholipids (GP)	Glycerophosphocholines	Phosphatidylcholines (PC)	positive	[M+H]+ / [M+H]+ / [M+NH4]+	Yes
770.571	PE_38:2_[M-H]1-	Glycerophospholipids (GP)	Glycerophosphoethanolamines	Phosphatidylethanolamines (PE)	negative	[M-H]-	No
770.606	PC-O_36:3_[M+H]1+ / PC-P_36:2_[M+H]1+	Glycerophospholipids (GP)	Glycerophosphocholines	Phosphatidylcholines (PC)	positive	[M+H]+ / [M+H]+	Yes
771.518	PG_36:3_[M-H]1-	Glycerophospholipids (GP)	Glycerophosphoglycerols	Phosphatidylglycerols (PG)	negative	[M-H]-	No
771.638	SM_39:2_[M+H]1+	Sphingolipids (SP)	Phosphosphingolipids	Sphingomyelins (SM)	positive	[M+H]+	No
772.529	PE-P_40:7_[M-H]1-	Glycerophospholipids (GP)	Glycerophosphoethanolamines	Phosphatidylethanolamines (PE)	negative	[M-H]-	No
772.585	PC_35:2_[M+H]1+ / PE_38:2_[M+H]1+ / PA_40:3_[M+NH4]1+	Glycerophospholipids (GP)	Glycerophosphocholines	Phosphatidylcholines (PC)	positive	[M+H]+ / [M+H]+ / [M+NH4]+	Yes
772.621	PC-O_36:2_[M+H]1+ / PC-P_36:1_[M+H]1+ / PE-P_39:1_[M+H]1+	Glycerophospholipids (GP)	Glycerophosphocholines	Phosphatidylcholines (PC)	positive	[M+H]+ / [M+H]+ / [M+H]+	Yes
773.534	PG_36:2_[M-H]1-	Glycerophospholipids (GP)	Glycerophosphoglycerols	Phosphatidylglycerols (PG)	negative	[M-H]-	Yes
773.653	SM_39:1_[M+H]1+	Sphingolipids (SP)	Phosphosphingolipids	Sphingomyelins (SM)	positive	[M+H]+	Yes
774.544	PE-P_40:6_[M-H]1-	Glycerophospholipids (GP)	Glycerophosphoethanolamines	Phosphatidylethanolamines (PE)	negative	[M-H]-	No
774.564	PS-O_36:2_[M+H]1+ / PG-O_36:4_[M+NH4]1+	Glycerophospholipids (GP)	Glycerophosphoserines	Phosphatidylserines (PS)	positive	[M+H]+ / [M+NH4]+	No
774.601	PC_35:1_[M+H]1+ / PE_38:1_[M+H]1+ / PA_40:2_[M+NH4]1+	Glycerophospholipids (GP)	Glycerophosphocholines	Phosphatidylcholines (PC)	positive	[M+H]+ / [M+H]+ / [M+NH4]+	Yes
774.637	PC-O_36:1_[M+H]1+ / PC-P_36:0_[M+H]1+ / PE-O_39:1_[M+H]1+	Glycerophospholipids (GP)	Glycerophosphocholines	Phosphatidylcholines (PC)	positive	[M+H]+ / [M+H]+ / [M+H]+	Yes
774.661	TG_45:4_[M+NH4]1+	Glycerolipids (GL)	Triradylglycerols	Triacylglycerols (TG)	positive	[M+NH4]+	No
775.549	PG_36:1_[M-H]1-	Glycerophospholipids (GP)	Glycerophosphoglycerols	Phosphatidylglycerols (PG)	negative	[M-H]-	Yes
776.56	PE-O_40:6_[M-H]1- / PE-P_40:5_[M-H]1-	Glycerophospholipids (GP)	Glycerophosphoethanolamines	Phosphatidylethanolamines (PE)	negative	[M-H]- / [M-H]-	No
777.565	PG_36:0_[M-H]1-	Glycerophospholipids (GP)	Glycerophosphoglycerols	Phosphatidylglycerols (PG)	negative	[M-H]-	Yes
778.538	PC_36:6_[M+H]1+ / PE_39:6_[M+H]1+ / PA_41:7_[M+NH4]1+	Glycerophospholipids (GP)	Glycerophosphocholines	Phosphatidylcholines (PC)	positive	[M+H]+ / [M+H]+ / [M+NH4]+	No
778.576	PE-O_40:5_[M-H]1- / PE-P_40:4_[M-H]1-	Glycerophospholipids (GP)	Glycerophosphoethanolamines	Phosphatidylethanolamines (PE)	negative	[M-H]- / [M-H]-	No
778.597	PC-O_32:0_[M+OAc]1-	Glycerophospholipids (GP)	Glycerophosphocholines	Phosphatidylcholines (PC)	negative	[M+OAc]-	No
780.554	PC_36:5_[M+H]1+ / PE_39:5_[M+H]1+ / PA_41:6_[M+NH4]1+	Glycerophospholipids (GP)	Glycerophosphocholines	Phosphatidylcholines (PC)	positive	[M+H]+ / [M+H]+ / [M+NH4]+	No
780.555	PE_39:4_[M-H]1-	Glycerophospholipids (GP)	Glycerophosphoethanolamines	Phosphatidylethanolamines (PE)	negative	[M-H]-	Yes
780.591	PE-O_40:4_[M-H]1- / PE-P_40:3_[M-H]1-	Glycerophospholipids (GP)	Glycerophosphoethanolamines	Phosphatidylethanolamines (PE)	negative	[M-H]- / [M-H]-	No
782.569	PC_36:4_[M+H]1+ / PE_39:4_[M+H]1+ / PA_41:5_[M+NH4]1+	Glycerophospholipids (GP)	Glycerophosphocholines	Phosphatidylcholines (PC)	positive	[M+H]+ / [M+H]+ / [M+NH4]+	Yes
782.571	PE_39:3_[M-H]1-	Glycerophospholipids (GP)	Glycerophosphoethanolamines	Phosphatidylethanolamines (PE)	negative	[M-H]-	No
783.638	SM_40:3_[M+H]1+	Sphingolipids (SP)	Phosphosphingolipids	Sphingomyelins (SM)	positive	[M+H]+	Yes
784.55	PS-P_37:2_[M-H]1-	Glycerophospholipids (GP)	Glycerophosphoserines	Phosphatidylserines (PS)	negative	[M-H]-	No
784.585	PC_36:3_[M+H]1+ / PE_39:3_[M+H]1+ / PA_41:4_[M+NH4]1+	Glycerophospholipids (GP)	Glycerophosphocholines	Phosphatidylcholines (PC)	positive	[M+H]+ / [M+H]+ / [M+NH4]+	Yes
784.586	PE_39:2_[M-H]1-	Glycerophospholipids (GP)	Glycerophosphoethanolamines	Phosphatidylethanolamines (PE)	negative	[M-H]-	No
785.534	PG_37:3_[M-H]1-	Glycerophospholipids (GP)	Glycerophosphoglycerols	Phosphatidylglycerols (PG)	negative	[M-H]-	Yes
785.581	SM_36:3_[M+OAc]1-	Sphingolipids (SP)	Phosphosphingolipids	Sphingomyelins (SM)	negative	[M+OAc]-	Yes
785.653	SM_40:2_[M+H]1+	Sphingolipids (SP)	Phosphosphingolipids	Sphingomyelins (SM)	positive	[M+H]+	Yes
786.661	TG_46:5_[M+NH4]1+	Glycerolipids (GL)	Triradylglycerols	Triacylglycerols (TG)	positive	[M+NH4]+	No
787.669	SM_40:1_[M+H]1+	Sphingolipids (SP)	Phosphosphingolipids	Sphingomyelins (SM)	positive	[M+H]+	Yes
788.524	PE_40:7_[M-H]1-	Glycerophospholipids (GP)	Glycerophosphoethanolamines	Phosphatidylethanolamines (PE)	negative	[M-H]-	Yes
788.616	PC_36:1_[M+H]1+ / PE_39:1_[M+H]1+ / PA_41:2_[M+NH4]1+	Glycerophospholipids (GP)	Glycerophosphocholines	Phosphatidylcholines (PC)	positive	[M+H]+ / [M+H]+ / [M+NH4]+	Yes
788.676	TG_46:4_[M+NH4]1+	Glycerolipids (GL)	Triradylglycerols	Triacylglycerols (TG)	positive	[M+NH4]+	No
789.684	SM_40:0_[M+H]1+	Sphingolipids (SP)	Phosphosphingolipids	Sphingomyelins (SM)	positive	[M+H]+	Yes
790.539	PE_40:6_[M-H]1-	Glycerophospholipids (GP)	Glycerophosphoethanolamines	Phosphatidylethanolamines (PE)	negative	[M-H]-	Yes
790.559	PS_36:1_[M+H]1+ / PG_36:3_[M+NH4]1+	Glycerophospholipids (GP)	Glycerophosphoserines	Phosphatidylserines (PS)	positive	[M+H]+ / [M+NH4]+	No
790.574	PC-P_38:6_[M+H]1+	Glycerophospholipids (GP)	Glycerophosphocholines	Phosphatidylcholines (PC)	positive	[M+H]+	No
790.692	TG_46:3_[M+NH4]1+	Glycerolipids (GL)	Triradylglycerols	Triacylglycerols (TG)	positive	[M+NH4]+	No
791.617	PG-O_38:0_[M-H]1-	Glycerophospholipids (GP)	Glycerophosphoglycerols	Phosphatidylglycerols (PG)	negative	[M-H]-	No
792.554	PC_37:6_[M+H]1+ / PE_40:6_[M+H]1+ / PA_42:7_[M+NH4]1+	Glycerophospholipids (GP)	Glycerophosphocholines	Phosphatidylcholines (PC)	positive	[M+H]+ / [M+H]+ / [M+NH4]+	Yes
792.576	PC_32:0_[M+OAc]1-	Glycerophospholipids (GP)	Glycerophosphocholines	Phosphatidylcholines (PC)	negative	[M+OAc]-	Yes
792.708	TG_46:2_[M+NH4]1+	Glycerolipids (GL)	Triradylglycerols	Triacylglycerols (TG)	positive	[M+NH4]+	Yes
794.569	PC_37:5_[M+H]1+ / PE_40:5_[M+H]1+ / PA_42:6_[M+NH4]1+	Glycerophospholipids (GP)	Glycerophosphocholines	Phosphatidylcholines (PC)	positive	[M+H]+ / [M+H]+ / [M+NH4]+	Yes
794.571	PE_40:4_[M-H]1-	Glycerophospholipids (GP)	Glycerophosphoethanolamines	Phosphatidylethanolamines (PE)	negative	[M-H]-	Yes
794.606	PC-O_38:5_[M+H]1+ / PC-P_38:4_[M+H]1+	Glycerophospholipids (GP)	Glycerophosphocholines	Phosphatidylcholines (PC)	positive	[M+H]+ / [M+H]+	Yes
794.723	TG_46:1_[M+NH4]1+	Glycerolipids (GL)	Triradylglycerols	Triacylglycerols (TG)	positive	[M+NH4]+	Yes
796.549	PS-O_38:5_[M+H]1+ / PG-P_38:6_[M+NH4]1+	Glycerophospholipids (GP)	Glycerophosphoserines	Phosphatidylserines (PS)	positive	[M+H]+ / [M+NH4]+	No
796.585	PC_37:4_[M+H]1+ / PE_40:4_[M+H]1+ / PA_42:5_[M+NH4]1+	Glycerophospholipids (GP)	Glycerophosphocholines	Phosphatidylcholines (PC)	positive	[M+H]+ / [M+H]+ / [M+NH4]+	Yes
796.621	PC-O_38:4_[M+H]1+ / PC-P_38:3_[M+H]1+	Glycerophospholipids (GP)	Glycerophosphocholines	Phosphatidylcholines (PC)	positive	[M+H]+ / [M+H]+	Yes
796.739	TG_46:0_[M+NH4]1+	Glycerolipids (GL)	Triradylglycerols	Triacylglycerols (TG)	positive	[M+NH4]+	Yes
798.564	PS-O_38:4_[M+H]1+ / PG-O_38:6_[M+NH4]1+	Glycerophospholipids (GP)	Glycerophosphoserines	Phosphatidylserines (PS)	positive	[M+H]+ / [M+NH4]+	No
798.565	PC-O_34:4_[M+OAc]1- / PC-P_34:3_[M+OAc]1- / PS-O_38:3_[M-H]1-	Glycerophospholipids (GP)	Glycerophosphocholines	Phosphatidylcholines (PC)	negative	[M+OAc]- / [M+OAc]- / [M-H]-	No
799.669	SM_41:2_[M+H]1+	Sphingolipids (SP)	Phosphosphingolipids	Sphingomyelins (SM)	positive	[M+H]+	Yes
800.545	PC_33:3_[M+OAc]1- / PS_37:2_[M-H]1-	Glycerophospholipids (GP)	Glycerophosphocholines	Phosphatidylcholines (PC)	negative	[M+OAc]- / [M-H]-	Yes
801.684	SM_41:0_[M+H]1+	Sphingolipids (SP)	Phosphosphingolipids	Sphingomyelins (SM)	positive	[M+H]+	No
802.56	PC_33:2_[M+OAc]1- / PS_37:1_[M-H]1-	Glycerophospholipids (GP)	Glycerophosphocholines	Phosphatidylcholines (PC)	negative	[M+OAc]- / [M-H]-	No
802.596	PS-O_38:2_[M+H]1+ / PG-O_38:4_[M+NH4]1+	Glycerophospholipids (GP)	Glycerophosphoserines	Phosphatidylserines (PS)	positive	[M+H]+ / [M+NH4]+	No
802.692	TG_47:4_[M+NH4]1+	Glycerolipids (GL)	Triradylglycerols	Triacylglycerols (TG)	positive	[M+NH4]+	No
806.569	PC_38:6_[M+H]1+ / PE_41:6_[M+H]1+	Glycerophospholipids (GP)	Glycerophosphocholines	Phosphatidylcholines (PC)	positive	[M+H]+ / [M+H]+	Yes
807.539	PI-O_33:1_[M-H]1-	Glycerophospholipids (GP)	Glycerophosphoinositols	Phosphatidylinositols (PI)	negative	[M-H]-	No
808.585	PC_38:5_[M+H]1+ / PE_41:5_[M+H]1+ / PA_43:6_[M+NH4]1+	Glycerophospholipids (GP)	Glycerophosphocholines	Phosphatidylcholines (PC)	positive	[M+H]+ / [M+H]+ / [M+NH4]+	Yes
808.739	TG_47:1_[M+NH4]1+	Glycerolipids (GL)	Triradylglycerols	Triacylglycerols (TG)	positive	[M+NH4]+	Yes
809.555	PI-O_33:0_[M-H]1-	Glycerophospholipids (GP)	Glycerophosphoinositols	Phosphatidylinositols (PI)	negative	[M-H]-	Yes
810.601	PC_38:4_[M+H]1+ / PE_41:4_[M+H]1+	Glycerophospholipids (GP)	Glycerophosphocholines	Phosphatidylcholines (PC)	positive	[M+H]+ / [M+H]+	Yes
811.669	SM_42:3_[M+H]1+	Sphingolipids (SP)	Phosphosphingolipids	Sphingomyelins (SM)	positive	[M+H]+	Yes
812.581	PC-O_35:4_[M+OAc]1- / PC-P_35:3_[M+OAc]1-	Glycerophospholipids (GP)	Glycerophosphocholines	Phosphatidylcholines (PC)	negative	[M+OAc]- / [M+OAc]-	No
812.616	PC_38:3_[M+H]1+ / PE_41:3_[M+H]1+ / PA_43:4_[M+NH4]1+	Glycerophospholipids (GP)	Glycerophosphocholines	Phosphatidylcholines (PC)	positive	[M+H]+ / [M+H]+ / [M+NH4]+	Yes
813.684	SM_42:2_[M+H]1+	Sphingolipids (SP)	Phosphosphingolipids	Sphingomyelins (SM)	positive	[M+H]+	Yes
814.538	PE_42:9_[M+H]1+ / PA_44:10_[M+NH4]1+	Glycerophospholipids (GP)	Glycerophosphoethanolamines	Phosphatidylethanolamines (PE)	positive	[M+H]+ / [M+NH4]+	No
814.559	PS_38:3_[M+H]1+ / PG_38:5_[M+NH4]1+	Glycerophospholipids (GP)	Glycerophosphoserines	Phosphatidylserines (PS)	positive	[M+H]+ / [M+NH4]+	No
814.597	PC-O_35:3_[M+OAc]1- / PC-P_35:2_[M+OAc]1- / PS-P_39:1_[M-H]1-	Glycerophospholipids (GP)	Glycerophosphocholines	Phosphatidylcholines (PC)	negative	[M+OAc]- / [M+OAc]- / [M-H]-	No
814.632	PC_38:2_[M+H]1+ / PE_41:2_[M+H]1+	Glycerophospholipids (GP)	Glycerophosphocholines	Phosphatidylcholines (PC)	positive	[M+H]+ / [M+H]+	Yes
815.7	SM_42:1_[M+H]1+	Sphingolipids (SP)	Phosphosphingolipids	Sphingomyelins (SM)	positive	[M+H]+	Yes
816.576	PC_34:2_[M+OAc]1- / PS_38:1_[M-H]1-	Glycerophospholipids (GP)	Glycerophosphocholines	Phosphatidylcholines (PC)	negative	[M+OAc]- / [M-H]-	Yes
816.708	TG_48:4_[M+NH4]1+	Glycerolipids (GL)	Triradylglycerols	Triacylglycerols (TG)	positive	[M+NH4]+	No
818.569	PC_39:7_[M+H]1+ / PE_42:7_[M+H]1+ / PA_44:8_[M+NH4]1+	Glycerophospholipids (GP)	Glycerophosphocholines	Phosphatidylcholines (PC)	positive	[M+H]+ / [M+H]+ / [M+NH4]+	No
818.606	PC-P_40:6_[M+H]1+	Glycerophospholipids (GP)	Glycerophosphocholines	Phosphatidylcholines (PC)	positive	[M+H]+	Yes
818.7	PC-O_39:0_[M+H]1+ / PE-O_42:0_[M+H]1+	Glycerophospholipids (GP)	Glycerophosphocholines	Phosphatidylcholines (PC)	positive	[M+H]+ / [M+H]+	No
818.723	TG_48:3_[M+NH4]1+	Glycerolipids (GL)	Triradylglycerols	Triacylglycerols (TG)	positive	[M+NH4]+	Yes
819.648	PG-O_40:0_[M-H]1-	Glycerophospholipids (GP)	Glycerophosphoglycerols	Phosphatidylglycerols (PG)	negative	[M-H]-	No
820.621	PC-O_40:6_[M+H]1+ / PC-P_40:5_[M+H]1+	Glycerophospholipids (GP)	Glycerophosphocholines	Phosphatidylcholines (PC)	positive	[M+H]+ / [M+H]+	Yes
820.739	TG_48:2_[M+NH4]1+	Glycerolipids (GL)	Triradylglycerols	Triacylglycerols (TG)	positive	[M+NH4]+	Yes
822.564	PS-O_40:6_[M+H]1+	Glycerophospholipids (GP)	Glycerophosphoserines	Phosphatidylserines (PS)	positive	[M+H]+	No
822.637	PC-O_40:5_[M+H]1+ / PC-P_40:4_[M+H]1+	Glycerophospholipids (GP)	Glycerophosphocholines	Phosphatidylcholines (PC)	positive	[M+H]+ / [M+H]+	Yes
822.755	TG_48:1_[M+NH4]1+	Glycerolipids (GL)	Triradylglycerols	Triacylglycerols (TG)	positive	[M+NH4]+	Yes
823.534	PI_33:0_[M-H]1-	Glycerophospholipids (GP)	Glycerophosphoinositols	Phosphatidylinositols (PI)	negative	[M-H]-	Yes
823.569	PI-O_34:1_[M+H]1+	Glycerophospholipids (GP)	Glycerophosphoinositols	Phosphatidylinositols (PI)	positive	[M+H]+	No
824.545	PC_35:5_[M+OAc]1- / PS_39:4_[M-H]1-	Glycerophospholipids (GP)	Glycerophosphocholines	Phosphatidylcholines (PC)	negative	[M+OAc]- / [M-H]-	No
824.58	PS-O_40:5_[M+H]1+ / PG-P_40:6_[M+NH4]1+	Glycerophospholipids (GP)	Glycerophosphoserines	Phosphatidylserines (PS)	positive	[M+H]+ / [M+NH4]+	No
824.77	TG_48:0_[M+NH4]1+	Glycerolipids (GL)	Triradylglycerols	Triacylglycerols (TG)	positive	[M+NH4]+	Yes
825.585	PI-O_34:0_[M+H]1+	Glycerophospholipids (GP)	Glycerophosphoinositols	Phosphatidylinositols (PI)	positive	[M+H]+	No
826.596	PS-O_40:4_[M+H]1+ / PG-O_40:6_[M+NH4]1+	Glycerophospholipids (GP)	Glycerophosphoserines	Phosphatidylserines (PS)	positive	[M+H]+ / [M+NH4]+	No
827.7	SM_43_2_[M+H]1+	Sphingolipids (SP)	Phosphosphingolipids	Sphingomyelins (SM)	positive	[M+H]+	No
828.708	TG_49:5_[M+NH4]1+	Glycerolipids (GL)	Triradylglycerols	Triacylglycerols (TG)	positive	[M+NH4]+	No
830.723	TG_49:4_[M+NH4]1+	Glycerolipids (GL)	Triradylglycerols	Triacylglycerols (TG)	positive	[M+NH4]+	No
832.585	PC_40:7_[M+H]1+	Glycerophospholipids (GP)	Glycerophosphocholines	Phosphatidylcholines (PC)	positive	[M+H]+	No
832.739	TG_49:3_[M+NH4]1+	Glycerolipids (GL)	Triradylglycerols	Triacylglycerols (TG)	positive	[M+NH4]+	Yes
833.519	PI_34:2_[M-H]1-	Glycerophospholipids (GP)	Glycerophosphoinositols	Phosphatidylinositols (PI)	negative	[M-H]-	Yes
833.664	PG-O_41:0_[M-H]1-	Glycerophospholipids (GP)	Glycerophosphoglycerols	Phosphatidylglycerols (PG)	negative	[M-H]-	No
834.601	PC_40:6_[M+H]1+ / PE_43:6_[M+H]1+	Glycerophospholipids (GP)	Glycerophosphocholines	Phosphatidylcholines (PC)	positive	[M+H]+ / [M+H]+	Yes
834.623	PC_35:0_[M+OAc]1-	Glycerophospholipids (GP)	Glycerophosphocholines	Phosphatidylcholines (PC)	negative	[M+OAc]-	No
834.755	TG_49:2_[M+NH4]1+	Glycerolipids (GL)	Triradylglycerols	Triacylglycerols (TG)	positive	[M+NH4]+	Yes
835.534	PI_34:1_[M-H]1-	Glycerophospholipids (GP)	Glycerophosphoinositols	Phosphatidylinositols (PI)	negative	[M-H]-	Yes
836.616	PC_40:5_[M+H]1+	Glycerophospholipids (GP)	Glycerophosphocholines	Phosphatidylcholines (PC)	positive	[M+H]+	Yes
836.674	PG-O_40:1_[M+NH4]1+	Glycerophospholipids (GP)	Glycerophosphoglycerols	Phosphatidylglycerols (PG)	positive	[M+NH4]+	No
836.77	TG_49:1_[M+NH4]1+	Glycerolipids (GL)	Triradylglycerols	Triacylglycerols (TG)	positive	[M+NH4]+	Yes
837.586	PI-O_35:0_[M-H]1-	Glycerophospholipids (GP)	Glycerophosphoinositols	Phosphatidylinositols (PI)	negative	[M-H]-	No
838.559	PS_40:5_[M+H]1+ / PG_40:7_[M+NH4]1+	Glycerophospholipids (GP)	Glycerophosphoserines	Phosphatidylserines (PS)	positive	[M+H]+ / [M+NH4]+	No
838.632	PC_40:4_[M+H]1+ / PE_43:4_[M+H]1+	Glycerophospholipids (GP)	Glycerophosphocholines	Phosphatidylcholines (PC)	positive	[M+H]+ / [M+H]+	No
839.564	PI_34:0_[M+H]1+	Glycerophospholipids (GP)	Glycerophosphoinositols	Phosphatidylinositols (PI)	positive	[M+H]+	No
842.591	PS_40:3_[M+H]1+ / PG_40:5_[M+NH4]1+	Glycerophospholipids (GP)	Glycerophosphoserines	Phosphatidylserines (PS)	positive	[M+H]+ / [M+NH4]+	No
842.723	TG_50:5_[M+NH4]1+	Glycerolipids (GL)	Triradylglycerols	Triacylglycerols (TG)	positive	[M+NH4]+	No
844.607	PC_36:2_[M+OAc]1- / PS_40:1_[M-H]1-	Glycerophospholipids (GP)	Glycerophosphocholines	Phosphatidylcholines (PC)	negative	[M+OAc]- / [M-H]-	Yes
844.739	TG_50:4_[M+NH4]1+	Glycerolipids (GL)	Triradylglycerols	Triacylglycerols (TG)	positive	[M+NH4]+	Yes
846.755	TG_50:3_[M+NH4]1+	Glycerolipids (GL)	Triradylglycerols	Triacylglycerols (TG)	positive	[M+NH4]+	Yes
847.534	PI_35:2_[M-H]1-	Glycerophospholipids (GP)	Glycerophosphoinositols	Phosphatidylinositols (PI)	negative	[M-H]-	Yes
847.68	PG-O_42:0_[M-H]1-	Glycerophospholipids (GP)	Glycerophosphoglycerols	Phosphatidylglycerols (PG)	negative	[M-H]-	No
848.58	PS-P_42:2_[M+H]1+	Glycerophospholipids (GP)	Glycerophosphoserines	Phosphatidylserines (PS)	positive	[M+H]+	No
848.639	PC_36:0_[M+OAc]1-	Glycerophospholipids (GP)	Glycerophosphocholines	Phosphatidylcholines (PC)	negative	[M+OAc]-	Yes
848.77	TG_50:2_[M+NH4]1+	Glycerolipids (GL)	Triradylglycerols	Triacylglycerols (TG)	positive	[M+NH4]+	Yes
850.596	PS-O_42:6_[M+H]1+	Glycerophospholipids (GP)	Glycerophosphoserines	Phosphatidylserines (PS)	positive	[M+H]+	No
850.786	TG_50:1_[M+NH4]1+	Glycerolipids (GL)	Triradylglycerols	Triacylglycerols (TG)	positive	[M+NH4]+	Yes
851.566	PI_35:0_[M-H]1-	Glycerophospholipids (GP)	Glycerophosphoinositols	Phosphatidylinositols (PI)	negative	[M-H]-	No
851.601	PI-O_36:1_[M+H]1+	Glycerophospholipids (GP)	Glycerophosphoinositols	Phosphatidylinositols (PI)	positive	[M+H]+	No
851.602	PI-O_36:0_[M-H]1-	Glycerophospholipids (GP)	Glycerophosphoinositols	Phosphatidylinositols (PI)	negative	[M-H]-	Yes
852.611	PS-P_42:1_[M+H]1+ / PG-P_42:6_[M+NH4]1+	Glycerophospholipids (GP)	Glycerophosphoserines	Phosphatidylserines (PS)	positive	[M+H]+ / [M+NH4]+	No
852.802	TG_50:0_[M+NH4]1+	Glycerolipids (GL)	Triradylglycerols	Triacylglycerols (TG)	positive	[M+NH4]+	Yes
856.607	PC_37:3_[M+OAc]1- / PS_41:2_[M-H]1-	Glycerophospholipids (GP)	Glycerophosphocholines	Phosphatidylcholines (PC)	negative	[M+OAc]- / [M-H]-	Yes
857.519	PI_36:4_[M-H]1-	Glycerophospholipids (GP)	Glycerophosphoinositols	Phosphatidylinositols (PI)	negative	[M-H]-	Yes
858.755	TG_51:4_[M+NH4]1+	Glycerolipids (GL)	Triradylglycerols	Triacylglycerols (TG)	positive	[M+NH4]+	Yes
859.534	PI_36:3_[M-H]1-	Glycerophospholipids (GP)	Glycerophosphoinositols	Phosphatidylinositols (PI)	negative	[M-H]-	Yes
860.77	TG_51:3_[M+NH4]1+	Glycerolipids (GL)	Triradylglycerols	Triacylglycerols (TG)	positive	[M+NH4]+	Yes
861.55	PI_36:2_[M-H]1-	Glycerophospholipids (GP)	Glycerophosphoinositols	Phosphatidylinositols (PI)	negative	[M-H]-	Yes
862.691	PC-O_38:0_[M+OAc]1-	Glycerophospholipids (GP)	Glycerophosphocholines	Phosphatidylcholines (PC)	negative	[M+OAc]-	No
862.786	TG_51:2_[M+NH4]1+	Glycerolipids (GL)	Triradylglycerols	Triacylglycerols (TG)	positive	[M+NH4]+	Yes
863.564	PI_36:2_[M+H]1+	Glycerophospholipids (GP)	Glycerophosphoinositols	Phosphatidylinositols (PI)	positive	[M+H]+	No
864.802	TG_51:1_[M+NH4]1+	Glycerolipids (GL)	Triradylglycerols	Triacylglycerols (TG)	positive	[M+NH4]+	Yes
868.739	TG_52:6_[M+NH4]1+	Glycerolipids (GL)	Triradylglycerols	Triacylglycerols (TG)	positive	[M+NH4]+	Yes
870.755	TG_52:5_[M+NH4]1+	Glycerolipids (GL)	Triradylglycerols	Triacylglycerols (TG)	positive	[M+NH4]+	Yes
871.691	SM_42:2_[M+OAc]1-	Sphingolipids (SP)	Phosphosphingolipids	Sphingomyelins (SM)	negative	[M+OAc]-	Yes
872.77	TG_52:4_[M+NH4]1+	Glycerolipids (GL)	Triradylglycerols	Triacylglycerols (TG)	positive	[M+NH4]+	Yes
874.786	TG_52:3_[M+NH4]1+	Glycerolipids (GL)	Triradylglycerols	Triacylglycerols (TG)	positive	[M+NH4]+	Yes
876.802	TG_52:2_[M+NH4]1+	Glycerolipids (GL)	Triradylglycerols	Triacylglycerols (TG)	positive	[M+NH4]+	Yes
878.592	PC_39:6_[M+OAc]1-	Glycerophospholipids (GP)	Glycerophosphocholines	Phosphatidylcholines (PC)	negative	[M+OAc]-	Yes
878.7	PC-O_44:5_[M+H]1+ / PC-P_44:4_[M+H]1+	Glycerophospholipids (GP)	Glycerophosphocholines	Phosphatidylcholines (PC)	positive	[M+H]+ / [M+H]+	No
878.817	TG_52:1_[M+NH4]1+	Glycerolipids (GL)	Triradylglycerols	Triacylglycerols (TG)	positive	[M+NH4]+	Yes
880.833	TG_52:0_[M+NH4]1+	Glycerolipids (GL)	Triradylglycerols	Triacylglycerols (TG)	positive	[M+NH4]+	Yes
883.534	PI_38:5_[M-H]1-	Glycerophospholipids (GP)	Glycerophosphoinositols	Phosphatidylinositols (PI)	negative	[M-H]-	Yes
884.77	TG_53:5_[M+NH4]1+	Glycerolipids (GL)	Triradylglycerols	Triacylglycerols (TG)	positive	[M+NH4]+	No
885.55	PI_38:4_[M-H]1-	Glycerophospholipids (GP)	Glycerophosphoinositols	Phosphatidylinositols (PI)	negative	[M-H]-	Yes
886.786	TG_53:4_[M+NH4]1+	Glycerolipids (GL)	Triradylglycerols	Triacylglycerols (TG)	positive	[M+NH4]+	Yes
888.742	PC_43:0_[M+H]1+	Glycerophospholipids (GP)	Glycerophosphocholines	Phosphatidylcholines (PC)	positive	[M+H]+	Yes
888.802	TG_53:3_[M+NH4]1+	Glycerolipids (GL)	Triradylglycerols	Triacylglycerols (TG)	positive	[M+NH4]+	Yes
890.591	PS_44:7_[M+H]1+	Glycerophospholipids (GP)	Glycerophosphoserines	Phosphatidylserines (PS)	positive	[M+H]+	No
890.592	PC_40:7_[M+OAc]1- / PS_44:6_[M-H]1-	Glycerophospholipids (GP)	Glycerophosphocholines	Phosphatidylcholines (PC)	negative	[M+OAc]- / [M-H]-	Yes
890.817	TG_53:2_[M+NH4]1+	Glycerolipids (GL)	Triradylglycerols	Triacylglycerols (TG)	positive	[M+NH4]+	Yes
891.596	PI_38:2_[M+H]1+	Glycerophospholipids (GP)	Glycerophosphoinositols	Phosphatidylinositols (PI)	positive	[M+H]+	No
891.597	PI_38:1_[M-H]1-	Glycerophospholipids (GP)	Glycerophosphoinositols	Phosphatidylinositols (PI)	negative	[M-H]-	Yes
892.607	PC_40:6_[M+OAc]1- / PS_44:5_[M-H]1-	Glycerophospholipids (GP)	Glycerophosphocholines	Phosphatidylcholines (PC)	negative	[M+OAc]- / [M-H]-	Yes
893.612	PI_38:0_[M-H]1-	Glycerophospholipids (GP)	Glycerophosphoinositols	Phosphatidylinositols (PI)	negative	[M-H]-	Yes
894.755	TG_54:7_[M+NH4]1+	Glycerolipids (GL)	Triradylglycerols	Triacylglycerols (TG)	positive	[M+NH4]+	Yes
896.77	TG_54:6_[M+NH4]1+	Glycerolipids (GL)	Triradylglycerols	Triacylglycerols (TG)	positive	[M+NH4]+	Yes
898.786	TG_54:5_[M+NH4]1+	Glycerolipids (GL)	Triradylglycerols	Triacylglycerols (TG)	positive	[M+NH4]+	Yes
900.802	TG_54:4_[M+NH4]1+	Glycerolipids (GL)	Triradylglycerols	Triacylglycerols (TG)	positive	[M+NH4]+	Yes
902.817	TG_54:3_[M+NH4]1+	Glycerolipids (GL)	Triradylglycerols	Triacylglycerols (TG)	positive	[M+NH4]+	Yes
904.739	TG_55:9_[M+NH4]1+	Glycerolipids (GL)	Triradylglycerols	Triacylglycerols (TG)	positive	[M+NH4]+	Yes
904.833	TG_54:2_[M+NH4]1+	Glycerolipids (GL)	Triradylglycerols	Triacylglycerols (TG)	positive	[M+NH4]+	Yes
906.659	PC-O_42:6_[M+OAc]1- / PC-P_42:5_[M+OAc]1-	Glycerophospholipids (GP)	Glycerophosphocholines	Phosphatidylcholines (PC)	negative	[M+OAc]- / [M+OAc]-	No
906.755	TG_55:8_[M+NH4]1+	Glycerolipids (GL)	Triradylglycerols	Triacylglycerols (TG)	positive	[M+NH4]+	Yes
906.848	TG_54:1_[M+NH4]1+	Glycerolipids (GL)	Triradylglycerols	Triacylglycerols (TG)	positive	[M+NH4]+	No
909.55	PI_40:6_[M-H]1-	Glycerophospholipids (GP)	Glycerophosphoinositols	Phosphatidylinositols (PI)	negative	[M-H]-	Yes
918.717	PC_41:0_[M+OAc]1-	Glycerophospholipids (GP)	Glycerophosphocholines	Phosphatidylcholines (PC)	negative	[M+OAc]-	No
920.77	TG_56:8_[M+NH4]1+	Glycerolipids (GL)	Triradylglycerols	Triacylglycerols (TG)	positive	[M+NH4]+	No
922.786	TG_56:7_[M+NH4]1+	Glycerolipids (GL)	Triradylglycerols	Triacylglycerols (TG)	positive	[M+NH4]+	Yes
924.67	PC_42:4_[M+OAc]1-	Glycerophospholipids (GP)	Glycerophosphocholines	Phosphatidylcholines (PC)	negative	[M+OAc]-	Yes
924.802	TG_56:6_[M+NH4]1+	Glycerolipids (GL)	Triradylglycerols	Triacylglycerols (TG)	positive	[M+NH4]+	Yes
926.817	TG_56:5_[M+NH4]1+	Glycerolipids (GL)	Triradylglycerols	Triacylglycerols (TG)	positive	[M+NH4]+	Yes
928.739	TG_57:11_[M+NH4]1+	Glycerolipids (GL)	Triradylglycerols	Triacylglycerols (TG)	positive	[M+NH4]+	Yes
928.833	TG_56:4_[M+NH4]1+	Glycerolipids (GL)	Triradylglycerols	Triacylglycerols (TG)	positive	[M+NH4]+	Yes
930.755	TG_57:10_[M+NH4]1+	Glycerolipids (GL)	Triradylglycerols	Triacylglycerols (TG)	positive	[M+NH4]+	Yes
932.77	TG_57:9_[M+NH4]1+	Glycerolipids (GL)	Triradylglycerols	Triacylglycerols (TG)	positive	[M+NH4]+	Yes
936.706	PC-O_44:5_[M+OAc]1- / PC-P_44:4_[M+OAc]1-	Glycerophospholipids (GP)	Glycerophosphocholines	Phosphatidylcholines (PC)	negative	[M+OAc]- / [M+OAc]-	No
944.732	PC_43:1_[M+OAc]1-	Glycerophospholipids (GP)	Glycerophosphocholines	Phosphatidylcholines (PC)	negative	[M+OAc]-	Yes
944.77	TG_58:10_[M+NH4]1+	Glycerolipids (GL)	Triradylglycerols	Triacylglycerols (TG)	positive	[M+NH4]+	No
946.786	TG_58:9_[M+NH4]1+	Glycerolipids (GL)	Triradylglycerols	Triacylglycerols (TG)	positive	[M+NH4]+	Yes
948.802	TG_58:8_[M+NH4]1+	Glycerolipids (GL)	Triradylglycerols	Triacylglycerols (TG)	positive	[M+NH4]+	No
950.686	PC_44:5_[M+OAc]1-	Glycerophospholipids (GP)	Glycerophosphocholines	Phosphatidylcholines (PC)	negative	[M+OAc]-	No
950.817	TG_58:7_[M+NH4]1+	Glycerolipids (GL)	Triradylglycerols	Triacylglycerols (TG)	positive	[M+NH4]+	No
954.755	TG_59:12_[M+NH4]1+	Glycerolipids (GL)	Triradylglycerols	Triacylglycerols (TG)	positive	[M+NH4]+	Yes
956.77	TG_59:11_[M+NH4]1+	Glycerolipids (GL)	Triradylglycerols	Triacylglycerols (TG)	positive	[M+NH4]+	Yes
988.795	PC_46:0_[M+OAc]1-	Glycerophospholipids (GP)	Glycerophosphocholines	Phosphatidylcholines (PC)	negative	[M+OAc]-	No
1064.83	PC_52:4_[M+OAc]1-	Glycerophospholipids (GP)	Glycerophosphocholines	Phosphatidylcholines (PC)	negative	[M+OAc]-	No

## Sheet: S3
Table S3. Number of significant variants and loci associated with each lipid subclass
		PROMIS				INTERVAL
Lipid category	Lipid subclass	No. lipids	No. lipids significantly associated with one or more variants	No. significant variants	No. loci	No. lipids	No. lipids significantly associated with one or more variants	No. significant variants	No. loci
Fatty acyls (FA)	Epoxyeicosatrienoic acids, prostaglandins, & other eicosanoids (EIC)	0	0	0	0	4	0	0	0
	Free fatty acids (FA)	22	5	30	2	31	6	48	2
	Jasmonic acids & other octadecanoids (JA)	0	0	0	0	9	0	0	0
Glycerolipids (GL)	Diacylglycerols (DG)	19	14	45	3	25	18	155	14
	Triacylglycerols (TG)	56	25	46	4	66	39	103	10
Glycerophospholipids (GP)	Phosphatidates (PA)	15	9	55	6	3	1	12	1
	Lysophosphatidylcholines (LPC)	8	2	30	2	16	7	69	6
	Lysophosphatidylethanolamines (LPE)	0	0	0	0	16	10	82	6
	Lysophosphatidylserines (LPS)	0	0	0	0	1	0	0	0
	Phosphatidylcholines (PC)	77	43	66	10	86	63	220	21
	Phosphatidylethanolamines (PE)	15	8	38	3	45	28	90	8
	Phosphatidylglycerols (PG)	9	4	31	3	14	7	49	5
	Phosphatidylinositols (PI)	23	16	55	7	23	14	54	4
	Phosphatidylserines (PS)	19	4	29	1	19	4	23	1
Sphingolipids (SP)	Ceramides (Cer)	13	7	6	1	5	5	14	3
	Sphingomyelins (SM)	51	32	63	11	27	25	132	12
Sterol lipids (ST)	Bile acids, alcohol, & derivatives (BA)	0	0	0	0	1	1	1	1
	Cholesterol & derivatives (Chol)	1	1	12	1	3	2	24	3
	Cholesteryl esters (CE)	12	11	49	4	15	14	80	8
Total unique		340	181	90	24	409	244	353	38

## Sheet: S4
Table S4. Summary of significant associations between lipid metabolites and genetic variants from univariate genome-wide association study in PROMIS
Lipid m/z	Lipid name	Lipid category	Lipid main class	Lipid subclass	rsID (if available)	Chr:Pos (GRCh37)	Effect/Non-Effect Alleles (GRCh37)	Beta	SE	P-value	Nearest gene	Locus
861.55	PI(36:2)_[M-H]1-	Glycerophospholipids (GP)	Glycerophosphoinositols	Phosphatidylinositols (PI)	rs626787	chr1:62901243	G / C	-0.0427	0.006	1.325e-12	USP1	ANGPTL3
861.55	PI(36:2)_[M-H]1-	Glycerophospholipids (GP)	Glycerophosphoinositols	Phosphatidylinositols (PI)	rs631106	chr1:62901807	A / C	-0.0427	0.006	1.383e-12	USP1	ANGPTL3
861.55	PI(36:2)_[M-H]1-	Glycerophospholipids (GP)	Glycerophosphoinositols	Phosphatidylinositols (PI)	rs9436221	chr1:62903359	C / T	-0.0427	0.006	1.318e-12	USP1	ANGPTL3
861.55	PI(36:2)_[M-H]1-	Glycerophospholipids (GP)	Glycerophosphoinositols	Phosphatidylinositols (PI)	rs9436222	chr1:62903363	G / C	-0.0431	0.006	9.415e-13	USP1	ANGPTL3
861.55	PI(36:2)_[M-H]1-	Glycerophospholipids (GP)	Glycerophosphoinositols	Phosphatidylinositols (PI)	rs9436223	chr1:62903547	T / C	-0.0417	0.0059	2.423e-12	USP1	ANGPTL3
861.55	PI(36:2)_[M-H]1-	Glycerophospholipids (GP)	Glycerophosphoinositols	Phosphatidylinositols (PI)	rs12029068	chr1:62904295	T / C	-0.0417	0.0059	2.423e-12	USP1	ANGPTL3
861.55	PI(36:2)_[M-H]1-	Glycerophospholipids (GP)	Glycerophosphoinositols	Phosphatidylinositols (PI)	rs9436661	chr1:62904575	G / T	-0.0418	0.0059	2.226e-12	USP1	ANGPTL3
861.55	PI(36:2)_[M-H]1-	Glycerophospholipids (GP)	Glycerophosphoinositols	Phosphatidylinositols (PI)	rs10493322	chr1:62905893	T / C	-0.04	0.006	2.558e-11	USP1	ANGPTL3
861.55	PI(36:2)_[M-H]1-	Glycerophospholipids (GP)	Glycerophosphoinositols	Phosphatidylinositols (PI)	chr1:62906089:I	chr1:62906089	CAA / C	-0.0398	0.006	3.209e-11	USP1	ANGPTL3
861.55	PI(36:2)_[M-H]1-	Glycerophospholipids (GP)	Glycerophosphoinositols	Phosphatidylinositols (PI)	rs638714	chr1:62906489	T / G	-0.0424	0.006	1.833e-12	USP1	ANGPTL3
861.55	PI(36:2)_[M-H]1-	Glycerophospholipids (GP)	Glycerophosphoinositols	Phosphatidylinositols (PI)	rs638305	chr1:62906537	T / G	-0.0417	0.0059	2.441e-12	USP1	ANGPTL3
861.55	PI(36:2)_[M-H]1-	Glycerophospholipids (GP)	Glycerophosphoinositols	Phosphatidylinositols (PI)	rs637723	chr1:62906728	T / C	-0.0416	0.0059	2.638e-12	USP1	ANGPTL3
861.55	PI(36:2)_[M-H]1-	Glycerophospholipids (GP)	Glycerophosphoinositols	Phosphatidylinositols (PI)	rs656297	chr1:62907595	G / A	-0.0417	0.0059	2.441e-12	USP1	ANGPTL3
861.55	PI(36:2)_[M-H]1-	Glycerophospholipids (GP)	Glycerophosphoinositols	Phosphatidylinositols (PI)	rs642845	chr1:62908235	C / T	-0.042	0.0059	1.663e-12	USP1	ANGPTL3
861.55	PI(36:2)_[M-H]1-	Glycerophospholipids (GP)	Glycerophosphoinositols	Phosphatidylinositols (PI)	rs641540	chr1:62908538	G / A	-0.0417	0.0059	2.441e-12	USP1	ANGPTL3
861.55	PI(36:2)_[M-H]1-	Glycerophospholipids (GP)	Glycerophosphoinositols	Phosphatidylinositols (PI)	chr1:62911303:I	chr1:62911303	GTGTA / G	-0.041	0.006	9.312e-12	USP1	ANGPTL3
861.55	PI(36:2)_[M-H]1-	Glycerophospholipids (GP)	Glycerophosphoinositols	Phosphatidylinositols (PI)	rs598253	chr1:62911341	C / T	-0.0416	0.0059	2.658e-12	USP1	ANGPTL3
861.55	PI(36:2)_[M-H]1-	Glycerophospholipids (GP)	Glycerophosphoinositols	Phosphatidylinositols (PI)	rs11207969	chr1:62911751	G / A	-0.0415	0.0059	3.125e-12	USP1	ANGPTL3
861.55	PI(36:2)_[M-H]1-	Glycerophospholipids (GP)	Glycerophosphoinositols	Phosphatidylinositols (PI)	rs659656	chr1:62912120	G / C	-0.0416	0.0059	2.658e-12	USP1	ANGPTL3
861.55	PI(36:2)_[M-H]1-	Glycerophospholipids (GP)	Glycerophosphoinositols	Phosphatidylinositols (PI)	rs10158897	chr1:62912919	T / C	-0.0398	0.006	2.752e-11	USP1	ANGPTL3
861.55	PI(36:2)_[M-H]1-	Glycerophospholipids (GP)	Glycerophosphoinositols	Phosphatidylinositols (PI)	rs783291	chr1:62914978	A / G	-0.0416	0.0059	2.658e-12	USP1	ANGPTL3
861.55	PI(36:2)_[M-H]1-	Glycerophospholipids (GP)	Glycerophosphoinositols	Phosphatidylinositols (PI)	rs11207970	chr1:62915473	T / C	-0.0399	0.006	2.532e-11	USP1	ANGPTL3
861.55	PI(36:2)_[M-H]1-	Glycerophospholipids (GP)	Glycerophosphoinositols	Phosphatidylinositols (PI)	rs583609	chr1:62916796	C / T	-0.0423	0.0059	1.218e-12	USP1	ANGPTL3
861.55	PI(36:2)_[M-H]1-	Glycerophospholipids (GP)	Glycerophosphoinositols	Phosphatidylinositols (PI)	rs597470	chr1:62917796	G / T	-0.0415	0.0059	2.996e-12	USP1	ANGPTL3
861.55	PI(36:2)_[M-H]1-	Glycerophospholipids (GP)	Glycerophosphoinositols	Phosphatidylinositols (PI)	rs597078	chr1:62917857	A / G	-0.0416	0.0059	2.658e-12	USP1	ANGPTL3
861.55	PI(36:2)_[M-H]1-	Glycerophospholipids (GP)	Glycerophosphoinositols	Phosphatidylinositols (PI)	rs597076	chr1:62917865	A / T	-0.0416	0.0059	2.658e-12	USP1	ANGPTL3
861.55	PI(36:2)_[M-H]1-	Glycerophospholipids (GP)	Glycerophosphoinositols	Phosphatidylinositols (PI)	rs630144	chr1:62918864	G / A	-0.0415	0.0059	3.102e-12	USP1	ANGPTL3
861.55	PI(36:2)_[M-H]1-	Glycerophospholipids (GP)	Glycerophosphoinositols	Phosphatidylinositols (PI)	chr1:62919978:I	chr1:62919978	CAT / C	-0.0399	0.006	2.532e-11	DOCK7	ANGPTL3
861.55	PI(36:2)_[M-H]1-	Glycerophospholipids (GP)	Glycerophosphoinositols	Phosphatidylinositols (PI)	rs636523	chr1:62920008	G / A	-0.0399	0.006	2.532e-11	DOCK7	ANGPTL3
861.55	PI(36:2)_[M-H]1-	Glycerophospholipids (GP)	Glycerophosphoinositols	Phosphatidylinositols (PI)	rs636497	chr1:62920029	G / A	-0.0416	0.0059	2.658e-12	DOCK7	ANGPTL3
861.55	PI(36:2)_[M-H]1-	Glycerophospholipids (GP)	Glycerophosphoinositols	Phosphatidylinositols (PI)	rs624660	chr1:62920388	A / C	-0.0416	0.0059	2.658e-12	DOCK7	ANGPTL3
861.55	PI(36:2)_[M-H]1-	Glycerophospholipids (GP)	Glycerophosphoinositols	Phosphatidylinositols (PI)	rs634341	chr1:62921422	C / T	-0.0416	0.0059	2.658e-12	DOCK7	ANGPTL3
861.55	PI(36:2)_[M-H]1-	Glycerophospholipids (GP)	Glycerophosphoinositols	Phosphatidylinositols (PI)	rs3913007	chr1:62921586	C / T	-0.0397	0.006	3.179e-11	DOCK7	ANGPTL3
861.55	PI(36:2)_[M-H]1-	Glycerophospholipids (GP)	Glycerophosphoinositols	Phosphatidylinositols (PI)	rs4350231	chr1:62922660	A / G	-0.0384	0.006	1.266e-10	DOCK7	ANGPTL3
861.55	PI(36:2)_[M-H]1-	Glycerophospholipids (GP)	Glycerophosphoinositols	Phosphatidylinositols (PI)	rs12023489	chr1:62923858	A / G	-0.0416	0.0059	2.677e-12	DOCK7	ANGPTL3
861.55	PI(36:2)_[M-H]1-	Glycerophospholipids (GP)	Glycerophosphoinositols	Phosphatidylinositols (PI)	rs12037659	chr1:62923863	T / C	-0.0399	0.006	2.918e-11	DOCK7	ANGPTL3
861.55	PI(36:2)_[M-H]1-	Glycerophospholipids (GP)	Glycerophosphoinositols	Phosphatidylinositols (PI)	chr1:62924204:D	chr1:62924204	T / TTG	0.0414	0.006	7.406e-12	DOCK7	ANGPTL3
861.55	PI(36:2)_[M-H]1-	Glycerophospholipids (GP)	Glycerophosphoinositols	Phosphatidylinositols (PI)	rs9988450	chr1:62924448	T / C	-0.043	0.006	9.353e-13	DOCK7	ANGPTL3
861.55	PI(36:2)_[M-H]1-	Glycerophospholipids (GP)	Glycerophosphoinositols	Phosphatidylinositols (PI)	rs1305520	chr1:62926057	T / A	0.0401	0.0059	1.326e-11	DOCK7	ANGPTL3
861.55	PI(36:2)_[M-H]1-	Glycerophospholipids (GP)	Glycerophosphoinositols	Phosphatidylinositols (PI)	rs7547965	chr1:62926371	G / A	-0.0408	0.0059	6.119e-12	DOCK7	ANGPTL3
861.55	PI(36:2)_[M-H]1-	Glycerophospholipids (GP)	Glycerophosphoinositols	Phosphatidylinositols (PI)	rs1167996	chr1:62927797	G / T	0.0414	0.0059	3.02e-12	DOCK7	ANGPTL3
861.55	PI(36:2)_[M-H]1-	Glycerophospholipids (GP)	Glycerophosphoinositols	Phosphatidylinositols (PI)	rs998403	chr1:62928549	A / G	-0.0392	0.006	4.463e-11	DOCK7	ANGPTL3
861.55	PI(36:2)_[M-H]1-	Glycerophospholipids (GP)	Glycerophosphoinositols	Phosphatidylinositols (PI)	chr1:62929378:D	chr1:62929378	T / TA	-0.04	0.0061	3.736e-11	DOCK7	ANGPTL3
861.55	PI(36:2)_[M-H]1-	Glycerophospholipids (GP)	Glycerophosphoinositols	Phosphatidylinositols (PI)	rs1177541	chr1:62929892	A / G	0.0404	0.006	1.712e-11	DOCK7	ANGPTL3
861.55	PI(36:2)_[M-H]1-	Glycerophospholipids (GP)	Glycerophosphoinositols	Phosphatidylinositols (PI)	rs11207972	chr1:62930224	A / G	0.0389	0.006	8.089e-11	DOCK7	ANGPTL3
861.55	PI(36:2)_[M-H]1-	Glycerophospholipids (GP)	Glycerophosphoinositols	Phosphatidylinositols (PI)	rs1167998	chr1:62931632	A / C	0.0395	0.0059	2.137e-11	DOCK7	ANGPTL3
861.55	PI(36:2)_[M-H]1-	Glycerophospholipids (GP)	Glycerophosphoinositols	Phosphatidylinositols (PI)	rs1168001	chr1:62933758	A / G	0.0397	0.0059	1.844e-11	DOCK7	ANGPTL3
861.55	PI(36:2)_[M-H]1-	Glycerophospholipids (GP)	Glycerophosphoinositols	Phosphatidylinositols (PI)	rs1168002	chr1:62934308	G / A	0.0397	0.0059	1.767e-11	DOCK7	ANGPTL3
861.55	PI(36:2)_[M-H]1-	Glycerophospholipids (GP)	Glycerophosphoinositols	Phosphatidylinositols (PI)	rs1168003	chr1:62934846	A / G	0.0397	0.0059	1.844e-11	DOCK7	ANGPTL3
861.55	PI(36:2)_[M-H]1-	Glycerophospholipids (GP)	Glycerophosphoinositols	Phosphatidylinositols (PI)	rs10889330	chr1:62939466	C / G	-0.0396	0.0059	1.985e-11	DOCK7	ANGPTL3
861.55	PI(36:2)_[M-H]1-	Glycerophospholipids (GP)	Glycerophosphoinositols	Phosphatidylinositols (PI)	rs1979722	chr1:62940097	A / G	-0.0392	0.006	4.653e-11	DOCK7	ANGPTL3
861.55	PI(36:2)_[M-H]1-	Glycerophospholipids (GP)	Glycerophosphoinositols	Phosphatidylinositols (PI)	chr1:62940265:I	chr1:62940265	GT / G	0.041	0.0059	4.522e-12	DOCK7	ANGPTL3
861.55	PI(36:2)_[M-H]1-	Glycerophospholipids (GP)	Glycerophosphoinositols	Phosphatidylinositols (PI)	chr1:62940266:I	chr1:62940266	TG / T	0.041	0.0059	4.522e-12	DOCK7	ANGPTL3
861.55	PI(36:2)_[M-H]1-	Glycerophospholipids (GP)	Glycerophosphoinositols	Phosphatidylinositols (PI)	rs10889331	chr1:62943007	T / G	0.0397	0.0059	1.844e-11	DOCK7	ANGPTL3
861.55	PI(36:2)_[M-H]1-	Glycerophospholipids (GP)	Glycerophosphoinositols	Phosphatidylinositols (PI)	rs1168009	chr1:62943954	A / G	0.0399	0.0059	1.492e-11	DOCK7	ANGPTL3
861.55	PI(36:2)_[M-H]1-	Glycerophospholipids (GP)	Glycerophosphoinositols	Phosphatidylinositols (PI)	rs1168010	chr1:62943979	A / G	0.0397	0.0059	1.844e-11	DOCK7	ANGPTL3
861.55	PI(36:2)_[M-H]1-	Glycerophospholipids (GP)	Glycerophosphoinositols	Phosphatidylinositols (PI)	chr1:62944947:D	chr1:62944947	C / CA	0.0404	0.006	1.643e-11	DOCK7	ANGPTL3
861.55	PI(36:2)_[M-H]1-	Glycerophospholipids (GP)	Glycerophosphoinositols	Phosphatidylinositols (PI)	rs1183260	chr1:62945418	G / A	0.0411	0.0059	4.227e-12	DOCK7	ANGPTL3
861.55	PI(36:2)_[M-H]1-	Glycerophospholipids (GP)	Glycerophosphoinositols	Phosphatidylinositols (PI)	rs6587976	chr1:62945631	T / C	-0.0409	0.0059	5.139e-12	DOCK7	ANGPTL3
861.55	PI(36:2)_[M-H]1-	Glycerophospholipids (GP)	Glycerophosphoinositols	Phosphatidylinositols (PI)	rs1305521	chr1:62949034	G / A	0.0412	0.0059	3.659e-12	DOCK7	ANGPTL3
861.55	PI(36:2)_[M-H]1-	Glycerophospholipids (GP)	Glycerophosphoinositols	Phosphatidylinositols (PI)	rs11207974	chr1:62949960	C / T	-0.0411	0.0059	4.227e-12	DOCK7	ANGPTL3
861.55	PI(36:2)_[M-H]1-	Glycerophospholipids (GP)	Glycerophosphoinositols	Phosphatidylinositols (PI)	rs10889332	chr1:62950858	T / C	-0.0411	0.0059	3.915e-12	DOCK7	ANGPTL3
861.55	PI(36:2)_[M-H]1-	Glycerophospholipids (GP)	Glycerophosphoinositols	Phosphatidylinositols (PI)	rs2489835	chr1:62954971	C / T	0.0407	0.006	1.021e-11	DOCK7	ANGPTL3
861.55	PI(36:2)_[M-H]1-	Glycerophospholipids (GP)	Glycerophosphoinositols	Phosphatidylinositols (PI)	rs1690761	chr1:62955862	T / C	0.0414	0.0059	2.853e-12	DOCK7	ANGPTL3
861.55	PI(36:2)_[M-H]1-	Glycerophospholipids (GP)	Glycerophosphoinositols	Phosphatidylinositols (PI)	rs10889333	chr1:62957030	A / G	-0.0395	0.006	3.376e-11	DOCK7	ANGPTL3
861.55	PI(36:2)_[M-H]1-	Glycerophospholipids (GP)	Glycerophosphoinositols	Phosphatidylinositols (PI)	rs10889334	chr1:62957199	G / C	-0.0396	0.006	2.904e-11	DOCK7	ANGPTL3
861.55	PI(36:2)_[M-H]1-	Glycerophospholipids (GP)	Glycerophosphoinositols	Phosphatidylinositols (PI)	rs10789112	chr1:62957758	C / T	-0.0398	0.006	2.41e-11	DOCK7	ANGPTL3
861.55	PI(36:2)_[M-H]1-	Glycerophospholipids (GP)	Glycerophosphoinositols	Phosphatidylinositols (PI)	rs10889335	chr1:62960101	G / A	-0.0391	0.006	6.272e-11	DOCK7	ANGPTL3
861.55	PI(36:2)_[M-H]1-	Glycerophospholipids (GP)	Glycerophosphoinositols	Phosphatidylinositols (PI)	rs1168040	chr1:62960575	C / T	0.0393	0.0059	3.184e-11	DOCK7	ANGPTL3
861.55	PI(36:2)_[M-H]1-	Glycerophospholipids (GP)	Glycerophosphoinositols	Phosphatidylinositols (PI)	rs1168036	chr1:62962734	G / A	0.0418	0.0059	1.76e-12	DOCK7	ANGPTL3
861.55	PI(36:2)_[M-H]1-	Glycerophospholipids (GP)	Glycerophosphoinositols	Phosphatidylinositols (PI)	rs1002687	chr1:62963737	A / G	0.0407	0.0059	6.412e-12	DOCK7	ANGPTL3
861.55	PI(36:2)_[M-H]1-	Glycerophospholipids (GP)	Glycerophosphoinositols	Phosphatidylinositols (PI)	rs1168034	chr1:62963914	C / G	0.0405	0.0059	8.047e-12	DOCK7	ANGPTL3
861.55	PI(36:2)_[M-H]1-	Glycerophospholipids (GP)	Glycerophosphoinositols	Phosphatidylinositols (PI)	rs35529421	chr1:62965621	A / T	-0.0379	0.006	2.422e-10	DOCK7	ANGPTL3
861.55	PI(36:2)_[M-H]1-	Glycerophospholipids (GP)	Glycerophosphoinositols	Phosphatidylinositols (PI)	rs1168032	chr1:62967747	G / A	0.0404	0.0059	9.846e-12	DOCK7	ANGPTL3
861.55	PI(36:2)_[M-H]1-	Glycerophospholipids (GP)	Glycerophosphoinositols	Phosphatidylinositols (PI)	rs1168031	chr1:62967987	T / C	0.0404	0.0059	9.44e-12	DOCK7	ANGPTL3
861.55	PI(36:2)_[M-H]1-	Glycerophospholipids (GP)	Glycerophosphoinositols	Phosphatidylinositols (PI)	chr1:62968433:I	chr1:62968433	AT / A	-0.0384	0.006	1.333e-10	DOCK7	ANGPTL3
861.55	PI(36:2)_[M-H]1-	Glycerophospholipids (GP)	Glycerophosphoinositols	Phosphatidylinositols (PI)	rs1168030	chr1:62968491	T / C	0.0405	0.0059	8.678e-12	DOCK7	ANGPTL3
861.55	PI(36:2)_[M-H]1-	Glycerophospholipids (GP)	Glycerophosphoinositols	Phosphatidylinositols (PI)	chr1:62968909:D	chr1:62968909	T / TA	-0.0387	0.006	1.114e-10	DOCK7	ANGPTL3
861.55	PI(36:2)_[M-H]1-	Glycerophospholipids (GP)	Glycerophosphoinositols	Phosphatidylinositols (PI)	rs1168029	chr1:62969402	A / G	0.04	0.0059	1.71e-11	DOCK7	ANGPTL3
861.55	PI(36:2)_[M-H]1-	Glycerophospholipids (GP)	Glycerophosphoinositols	Phosphatidylinositols (PI)	rs1168028	chr1:62969431	A / G	0.0405	0.0059	8.678e-12	DOCK7	ANGPTL3
861.55	PI(36:2)_[M-H]1-	Glycerophospholipids (GP)	Glycerophosphoinositols	Phosphatidylinositols (PI)	rs1168027	chr1:62970184	C / T	0.0418	0.0059	1.76e-12	DOCK7	ANGPTL3
861.55	PI(36:2)_[M-H]1-	Glycerophospholipids (GP)	Glycerophosphoinositols	Phosphatidylinositols (PI)	rs1168026	chr1:62970996	C / T	0.0406	0.0059	7.395e-12	DOCK7	ANGPTL3
861.55	PI(36:2)_[M-H]1-	Glycerophospholipids (GP)	Glycerophosphoinositols	Phosphatidylinositols (PI)	rs7527004	chr1:62972228	A / G	0.0401	0.0059	1.286e-11	DOCK7	ANGPTL3
861.55	PI(36:2)_[M-H]1-	Glycerophospholipids (GP)	Glycerophosphoinositols	Phosphatidylinositols (PI)	rs1184865	chr1:62973795	G / A	0.0405	0.0059	8.678e-12	DOCK7	ANGPTL3
861.55	PI(36:2)_[M-H]1-	Glycerophospholipids (GP)	Glycerophosphoinositols	Phosphatidylinositols (PI)	rs1168042	chr1:62974150	T / A	0.0415	0.0059	2.617e-12	DOCK7	ANGPTL3
861.55	PI(36:2)_[M-H]1-	Glycerophospholipids (GP)	Glycerophosphoinositols	Phosphatidylinositols (PI)	chr1:62974458:D	chr1:62974458	T / TTTAC	-0.0404	0.0061	2.389e-11	DOCK7	ANGPTL3
861.55	PI(36:2)_[M-H]1-	Glycerophospholipids (GP)	Glycerophosphoinositols	Phosphatidylinositols (PI)	rs11207976	chr1:62976751	A / G	-0.0417	0.0059	1.903e-12	DOCK7	ANGPTL3
861.55	PI(36:2)_[M-H]1-	Glycerophospholipids (GP)	Glycerophosphoinositols	Phosphatidylinositols (PI)	rs11207977	chr1:62977307	T / C	-0.04	0.0059	1.272e-11	DOCK7	ANGPTL3
861.55	PI(36:2)_[M-H]1-	Glycerophospholipids (GP)	Glycerophosphoinositols	Phosphatidylinositols (PI)	rs1781212	chr1:62977419	A / G	0.0418	0.0059	1.76e-12	DOCK7	ANGPTL3
861.55	PI(36:2)_[M-H]1-	Glycerophospholipids (GP)	Glycerophosphoinositols	Phosphatidylinositols (PI)	rs1168044	chr1:62977558	C / A	0.0418	0.0059	1.76e-12	DOCK7	ANGPTL3
861.55	PI(36:2)_[M-H]1-	Glycerophospholipids (GP)	Glycerophosphoinositols	Phosphatidylinositols (PI)	rs78390579	chr1:62980161	G / A	0.0405	0.0059	8.678e-12	DOCK7	ANGPTL3
861.55	PI(36:2)_[M-H]1-	Glycerophospholipids (GP)	Glycerophosphoinositols	Phosphatidylinositols (PI)	chr1:62980399:D	chr1:62980399	C / CACA	0.0403	0.0059	1.018e-11	DOCK7	ANGPTL3
861.55	PI(36:2)_[M-H]1-	Glycerophospholipids (GP)	Glycerophosphoinositols	Phosphatidylinositols (PI)	rs10889337	chr1:62980607	A / G	-0.0403	0.0059	8.845e-12	DOCK7	ANGPTL3
861.55	PI(36:2)_[M-H]1-	Glycerophospholipids (GP)	Glycerophosphoinositols	Phosphatidylinositols (PI)	rs12090886	chr1:62981440	A / G	0.0401	0.0059	1.275e-11	DOCK7	ANGPTL3
861.55	PI(36:2)_[M-H]1-	Glycerophospholipids (GP)	Glycerophosphoinositols	Phosphatidylinositols (PI)	rs1168045	chr1:62982891	T / C	0.0418	0.0059	1.76e-12	DOCK7	ANGPTL3
861.55	PI(36:2)_[M-H]1-	Glycerophospholipids (GP)	Glycerophosphoinositols	Phosphatidylinositols (PI)	rs11207979	chr1:62982994	A / G	-0.0418	0.0059	1.76e-12	DOCK7	ANGPTL3
861.55	PI(36:2)_[M-H]1-	Glycerophospholipids (GP)	Glycerophosphoinositols	Phosphatidylinositols (PI)	rs1168046	chr1:62983693	C / A	0.0418	0.0059	1.76e-12	DOCK7	ANGPTL3
861.55	PI(36:2)_[M-H]1-	Glycerophospholipids (GP)	Glycerophosphoinositols	Phosphatidylinositols (PI)	rs1168047	chr1:62983751	T / C	0.0418	0.0059	1.76e-12	DOCK7	ANGPTL3
861.55	PI(36:2)_[M-H]1-	Glycerophospholipids (GP)	Glycerophosphoinositols	Phosphatidylinositols (PI)	rs10889338	chr1:62984897	T / C	-0.0401	0.0059	1.131e-11	DOCK7	ANGPTL3
861.55	PI(36:2)_[M-H]1-	Glycerophospholipids (GP)	Glycerophosphoinositols	Phosphatidylinositols (PI)	chr1:62986146:D	chr1:62986146	A / AG	-0.0413	0.006	5.792e-12	DOCK7	ANGPTL3
861.55	PI(36:2)_[M-H]1-	Glycerophospholipids (GP)	Glycerophosphoinositols	Phosphatidylinositols (PI)	rs1168050	chr1:62986955	T / C	0.0419	0.0059	1.628e-12	DOCK7	ANGPTL3
861.55	PI(36:2)_[M-H]1-	Glycerophospholipids (GP)	Glycerophosphoinositols	Phosphatidylinositols (PI)	rs1690766	chr1:62987289	C / T	0.042	0.0059	1.38e-12	DOCK7	ANGPTL3
861.55	PI(36:2)_[M-H]1-	Glycerophospholipids (GP)	Glycerophosphoinositols	Phosphatidylinositols (PI)	rs1781195	chr1:62988972	C / T	0.0421	0.0059	1.288e-12	DOCK7	ANGPTL3
861.55	PI(36:2)_[M-H]1-	Glycerophospholipids (GP)	Glycerophosphoinositols	Phosphatidylinositols (PI)	rs1627591	chr1:62989807	T / C	0.0421	0.0059	1.288e-12	DOCK7	ANGPTL3
861.55	PI(36:2)_[M-H]1-	Glycerophospholipids (GP)	Glycerophosphoinositols	Phosphatidylinositols (PI)	rs11577840	chr1:62991369	C / T	0.042	0.0059	1.346e-12	DOCK7	ANGPTL3
861.55	PI(36:2)_[M-H]1-	Glycerophospholipids (GP)	Glycerophosphoinositols	Phosphatidylinositols (PI)	rs12062275	chr1:62991905	C / T	0.0421	0.0059	1.191e-12	DOCK7	ANGPTL3
861.55	PI(36:2)_[M-H]1-	Glycerophospholipids (GP)	Glycerophosphoinositols	Phosphatidylinositols (PI)	rs11207980	chr1:62992749	C / T	-0.0403	0.0059	8.38e-12	DOCK7	ANGPTL3
861.55	PI(36:2)_[M-H]1-	Glycerophospholipids (GP)	Glycerophosphoinositols	Phosphatidylinositols (PI)	rs4915838	chr1:62993068	A / G	0.0429	0.0059	5.514e-13	DOCK7	ANGPTL3
861.55	PI(36:2)_[M-H]1-	Glycerophospholipids (GP)	Glycerophosphoinositols	Phosphatidylinositols (PI)	rs61775910	chr1:62993403	A / G	-0.0405	0.006	1.562e-11	DOCK7	ANGPTL3
861.55	PI(36:2)_[M-H]1-	Glycerophospholipids (GP)	Glycerophosphoinositols	Phosphatidylinositols (PI)	rs12403207	chr1:62993620	C / T	0.0421	0.0059	1.191e-12	DOCK7	ANGPTL3
861.55	PI(36:2)_[M-H]1-	Glycerophospholipids (GP)	Glycerophosphoinositols	Phosphatidylinositols (PI)	rs1168015	chr1:62996046	G / C	0.0419	0.0059	1.506e-12	DOCK7	ANGPTL3
861.55	PI(36:2)_[M-H]1-	Glycerophospholipids (GP)	Glycerophosphoinositols	Phosphatidylinositols (PI)	chr1:62997736:D	chr1:62997736	C / CAG	-0.0431	0.006	6.971e-13	DOCK7	ANGPTL3
861.55	PI(36:2)_[M-H]1-	Glycerophospholipids (GP)	Glycerophosphoinositols	Phosphatidylinositols (PI)	chr1:62999110:I	chr1:62999110	AT / A	0.0424	0.006	1.595e-12	DOCK7	ANGPTL3
861.55	PI(36:2)_[M-H]1-	Glycerophospholipids (GP)	Glycerophosphoinositols	Phosphatidylinositols (PI)	rs4915840	chr1:62999595	G / C	0.0429	0.0059	4.678e-13	DOCK7	ANGPTL3
861.55	PI(36:2)_[M-H]1-	Glycerophospholipids (GP)	Glycerophosphoinositols	Phosphatidylinositols (PI)	rs7534572	chr1:62999675	G / C	0.0429	0.0059	4.678e-13	DOCK7	ANGPTL3
861.55	PI(36:2)_[M-H]1-	Glycerophospholipids (GP)	Glycerophosphoinositols	Phosphatidylinositols (PI)	chr1:63000731:D	chr1:63000731	G / GC	-0.0405	0.0059	7.208e-12	DOCK7	ANGPTL3
861.55	PI(36:2)_[M-H]1-	Glycerophospholipids (GP)	Glycerophosphoinositols	Phosphatidylinositols (PI)	rs1168018	chr1:63001120	C / A	0.0422	0.0059	1.101e-12	DOCK7	ANGPTL3
861.55	PI(36:2)_[M-H]1-	Glycerophospholipids (GP)	Glycerophosphoinositols	Phosphatidylinositols (PI)	rs1168017	chr1:63002551	G / A	0.0422	0.0059	1.101e-12	DOCK7	ANGPTL3
861.55	PI(36:2)_[M-H]1-	Glycerophospholipids (GP)	Glycerophosphoinositols	Phosphatidylinositols (PI)	rs7548877	chr1:63005950	C / T	0.0422	0.0059	1.101e-12	DOCK7	ANGPTL3
861.55	PI(36:2)_[M-H]1-	Glycerophospholipids (GP)	Glycerophosphoinositols	Phosphatidylinositols (PI)	rs11207981	chr1:63006087	A / C	0.0422	0.0059	1.101e-12	DOCK7	ANGPTL3
861.55	PI(36:2)_[M-H]1-	Glycerophospholipids (GP)	Glycerophosphoinositols	Phosphatidylinositols (PI)	rs1168023	chr1:63006595	T / A	0.0432	0.0059	3.084e-13	DOCK7	ANGPTL3
861.55	PI(36:2)_[M-H]1-	Glycerophospholipids (GP)	Glycerophosphoinositols	Phosphatidylinositols (PI)	rs11207982	chr1:63007182	T / C	-0.0405	0.0059	6.905e-12	DOCK7	ANGPTL3
861.55	PI(36:2)_[M-H]1-	Glycerophospholipids (GP)	Glycerophosphoinositols	Phosphatidylinositols (PI)	rs1184547	chr1:63007228	A / G	0.0422	0.0059	1.101e-12	DOCK7	ANGPTL3
861.55	PI(36:2)_[M-H]1-	Glycerophospholipids (GP)	Glycerophosphoinositols	Phosphatidylinositols (PI)	rs1168022	chr1:63007721	T / A	0.0418	0.0059	1.659e-12	DOCK7	ANGPTL3
861.55	PI(36:2)_[M-H]1-	Glycerophospholipids (GP)	Glycerophosphoinositols	Phosphatidylinositols (PI)	rs1168021	chr1:63009900	G / A	0.0421	0.0059	1.191e-12	DOCK7	ANGPTL3
861.55	PI(36:2)_[M-H]1-	Glycerophospholipids (GP)	Glycerophosphoinositols	Phosphatidylinositols (PI)	rs1168020	chr1:63009956	T / C	0.0422	0.0059	1.054e-12	DOCK7	ANGPTL3
861.55	PI(36:2)_[M-H]1-	Glycerophospholipids (GP)	Glycerophosphoinositols	Phosphatidylinositols (PI)	rs1179765	chr1:63010110	C / G	0.0422	0.0059	1.054e-12	DOCK7	ANGPTL3
861.55	PI(36:2)_[M-H]1-	Glycerophospholipids (GP)	Glycerophosphoinositols	Phosphatidylinositols (PI)	rs12074528	chr1:63010871	C / T	0.0422	0.0059	1.054e-12	DOCK7	ANGPTL3
861.55	PI(36:2)_[M-H]1-	Glycerophospholipids (GP)	Glycerophosphoinositols	Phosphatidylinositols (PI)	rs10889339	chr1:63012056	G / A	0.0421	0.0059	1.288e-12	DOCK7	ANGPTL3
861.55	PI(36:2)_[M-H]1-	Glycerophospholipids (GP)	Glycerophosphoinositols	Phosphatidylinositols (PI)	rs10889340	chr1:63012071	C / A	0.0421	0.0059	1.233e-12	DOCK7	ANGPTL3
861.55	PI(36:2)_[M-H]1-	Glycerophospholipids (GP)	Glycerophosphoinositols	Phosphatidylinositols (PI)	rs11207983	chr1:63012107	T / C	0.0421	0.0059	1.191e-12	DOCK7	ANGPTL3
861.55	PI(36:2)_[M-H]1-	Glycerophospholipids (GP)	Glycerophosphoinositols	Phosphatidylinositols (PI)	rs2029763	chr1:63013134	G / A	-0.0404	0.0059	7.446e-12	DOCK7	ANGPTL3
861.55	PI(36:2)_[M-H]1-	Glycerophospholipids (GP)	Glycerophosphoinositols	Phosphatidylinositols (PI)	rs11207984	chr1:63013396	T / C	0.0422	0.0059	1.14e-12	DOCK7	ANGPTL3
861.55	PI(36:2)_[M-H]1-	Glycerophospholipids (GP)	Glycerophosphoinositols	Phosphatidylinositols (PI)	rs11207985	chr1:63013786	G / A	0.0422	0.0059	1.14e-12	DOCK7	ANGPTL3
861.55	PI(36:2)_[M-H]1-	Glycerophospholipids (GP)	Glycerophosphoinositols	Phosphatidylinositols (PI)	rs10789113	chr1:63015199	T / A	-0.0404	0.0059	7.446e-12	DOCK7	ANGPTL3
861.55	PI(36:2)_[M-H]1-	Glycerophospholipids (GP)	Glycerophosphoinositols	Phosphatidylinositols (PI)	rs11207986	chr1:63018170	C / T	0.0422	0.0059	1.14e-12	DOCK7	ANGPTL3
861.55	PI(36:2)_[M-H]1-	Glycerophospholipids (GP)	Glycerophosphoinositols	Phosphatidylinositols (PI)	rs7519785	chr1:63019919	A / G	0.042	0.0059	1.349e-12	DOCK7	ANGPTL3
861.55	PI(36:2)_[M-H]1-	Glycerophospholipids (GP)	Glycerophosphoinositols	Phosphatidylinositols (PI)	rs10159255	chr1:63020816	A / C	-0.0402	0.0059	1.039e-11	DOCK7	ANGPTL3
861.55	PI(36:2)_[M-H]1-	Glycerophospholipids (GP)	Glycerophosphoinositols	Phosphatidylinositols (PI)	rs2131926	chr1:63026011	T / C	0.042	0.0059	1.455e-12	DOCK7	ANGPTL3
861.55	PI(36:2)_[M-H]1-	Glycerophospholipids (GP)	Glycerophosphoinositols	Phosphatidylinositols (PI)	rs10889343	chr1:63026429	G / T	0.042	0.0059	1.346e-12	DOCK7	ANGPTL3
861.55	PI(36:2)_[M-H]1-	Glycerophospholipids (GP)	Glycerophosphoinositols	Phosphatidylinositols (PI)	rs4329540	chr1:63027024	T / C	0.042	0.0059	1.346e-12	DOCK7	ANGPTL3
861.55	PI(36:2)_[M-H]1-	Glycerophospholipids (GP)	Glycerophosphoinositols	Phosphatidylinositols (PI)	rs4915621	chr1:63029433	G / A	0.0415	0.006	4.37e-12	DOCK7	ANGPTL3
861.55	PI(36:2)_[M-H]1-	Glycerophospholipids (GP)	Glycerophosphoinositols	Phosphatidylinositols (PI)	rs6693353	chr1:63031616	C / A	0.042	0.006	2.621e-12	DOCK7	ANGPTL3
861.55	PI(36:2)_[M-H]1-	Glycerophospholipids (GP)	Glycerophosphoinositols	Phosphatidylinositols (PI)	rs10889344	chr1:63033941	C / T	0.0422	0.0059	1.101e-12	DOCK7	ANGPTL3
861.55	PI(36:2)_[M-H]1-	Glycerophospholipids (GP)	Glycerophosphoinositols	Phosphatidylinositols (PI)	rs10789114	chr1:63034222	C / T	-0.0405	0.0059	6.832e-12	DOCK7	ANGPTL3
861.55	PI(36:2)_[M-H]1-	Glycerophospholipids (GP)	Glycerophosphoinositols	Phosphatidylinositols (PI)	rs7555577	chr1:63034363	C / A	0.0426	0.0059	6.565e-13	DOCK7	ANGPTL3
861.55	PI(36:2)_[M-H]1-	Glycerophospholipids (GP)	Glycerophosphoinositols	Phosphatidylinositols (PI)	rs144042353	chr1:63036129	A / G	-0.0431	0.006	6.803e-13	DOCK7	ANGPTL3
861.55	PI(36:2)_[M-H]1-	Glycerophospholipids (GP)	Glycerophosphoinositols	Phosphatidylinositols (PI)	rs116405518	chr1:63036807	A / G	0.0422	0.0059	1.018e-12	DOCK7	ANGPTL3
861.55	PI(36:2)_[M-H]1-	Glycerophospholipids (GP)	Glycerophosphoinositols	Phosphatidylinositols (PI)	rs12116574	chr1:63037837	T / C	-0.0406	0.0059	6.067e-12	DOCK7	ANGPTL3
861.55	PI(36:2)_[M-H]1-	Glycerophospholipids (GP)	Glycerophosphoinositols	Phosphatidylinositols (PI)	chr1:63038303:D	chr1:63038303	T / TGG	-0.0426	0.0059	6.281e-13	DOCK7	ANGPTL3
861.55	PI(36:2)_[M-H]1-	Glycerophospholipids (GP)	Glycerophosphoinositols	Phosphatidylinositols (PI)	rs6696502	chr1:63039533	T / C	0.0422	0.0059	1.018e-12	DOCK7	ANGPTL3
861.55	PI(36:2)_[M-H]1-	Glycerophospholipids (GP)	Glycerophosphoinositols	Phosphatidylinositols (PI)	rs12038768	chr1:63040728	T / G	-0.0407	0.0059	5.625e-12	DOCK7	ANGPTL3
861.55	PI(36:2)_[M-H]1-	Glycerophospholipids (GP)	Glycerophosphoinositols	Phosphatidylinositols (PI)	rs11207990	chr1:63041086	C / T	0.0422	0.0059	1.018e-12	DOCK7	ANGPTL3
861.55	PI(36:2)_[M-H]1-	Glycerophospholipids (GP)	Glycerophosphoinositols	Phosphatidylinositols (PI)	rs11207992	chr1:63041800	G / T	-0.0406	0.0059	7.595e-12	DOCK7	ANGPTL3
861.55	PI(36:2)_[M-H]1-	Glycerophospholipids (GP)	Glycerophosphoinositols	Phosphatidylinositols (PI)	rs1472257	chr1:63042126	G / A	0.0423	0.0059	9.006e-13	DOCK7	ANGPTL3
861.55	PI(36:2)_[M-H]1-	Glycerophospholipids (GP)	Glycerophosphoinositols	Phosphatidylinositols (PI)	rs10789116	chr1:63042738	G / A	-0.0407	0.0059	5.625e-12	DOCK7	ANGPTL3
861.55	PI(36:2)_[M-H]1-	Glycerophospholipids (GP)	Glycerophosphoinositols	Phosphatidylinositols (PI)	rs1748201	chr1:63045506	C / A	0.0422	0.0059	1.028e-12	DOCK7	ANGPTL3
861.55	PI(36:2)_[M-H]1-	Glycerophospholipids (GP)	Glycerophosphoinositols	Phosphatidylinositols (PI)	rs1748200	chr1:63046039	C / T	0.0422	0.0059	1.028e-12	DOCK7	ANGPTL3
861.55	PI(36:2)_[M-H]1-	Glycerophospholipids (GP)	Glycerophosphoinositols	Phosphatidylinositols (PI)	rs1629122	chr1:63046578	A / C	0.0423	0.0059	9.499e-13	DOCK7	ANGPTL3
861.55	PI(36:2)_[M-H]1-	Glycerophospholipids (GP)	Glycerophosphoinositols	Phosphatidylinositols (PI)	rs11207995	chr1:63049551	C / A	-0.0407	0.0059	6.469e-12	DOCK7	ANGPTL3
861.55	PI(36:2)_[M-H]1-	Glycerophospholipids (GP)	Glycerophosphoinositols	Phosphatidylinositols (PI)	rs1748195	chr1:63049593	G / C	-0.0426	0.0059	6.399e-13	DOCK7	ANGPTL3
861.55	PI(36:2)_[M-H]1-	Glycerophospholipids (GP)	Glycerophosphoinositols	Phosphatidylinositols (PI)	rs12042319	chr1:63049819	A / G	-0.0408	0.0059	5.996e-12	DOCK7	ANGPTL3
861.55	PI(36:2)_[M-H]1-	Glycerophospholipids (GP)	Glycerophosphoinositols	Phosphatidylinositols (PI)	rs3850634	chr1:63050598	G / T	-0.0407	0.0059	6.469e-12	DOCK7	ANGPTL3
861.55	PI(36:2)_[M-H]1-	Glycerophospholipids (GP)	Glycerophosphoinositols	Phosphatidylinositols (PI)	rs11207996	chr1:63055470	A / G	-0.0406	0.0059	7.345e-12	DOCK7	ANGPTL3
861.55	PI(36:2)_[M-H]1-	Glycerophospholipids (GP)	Glycerophosphoinositols	Phosphatidylinositols (PI)	rs1748197	chr1:63056112	A / G	-0.0419	0.0059	1.588e-12	DOCK7	ANGPTL3
861.55	PI(36:2)_[M-H]1-	Glycerophospholipids (GP)	Glycerophosphoinositols	Phosphatidylinositols (PI)	rs2366636	chr1:63056670	A / G	-0.0418	0.0059	1.717e-12	DOCK7	ANGPTL3
861.55	PI(36:2)_[M-H]1-	Glycerophospholipids (GP)	Glycerophosphoinositols	Phosphatidylinositols (PI)	rs1748199	chr1:63057136	C / T	-0.0418	0.0059	1.717e-12	DOCK7	ANGPTL3
861.55	PI(36:2)_[M-H]1-	Glycerophospholipids (GP)	Glycerophosphoinositols	Phosphatidylinositols (PI)	rs6690733	chr1:63060311	C / A	-0.0422	0.0059	1.143e-12	DOCK7	ANGPTL3
861.55	PI(36:2)_[M-H]1-	Glycerophospholipids (GP)	Glycerophosphoinositols	Phosphatidylinositols (PI)	rs11207997	chr1:63061906	T / C	-0.0421	0.0059	1.236e-12	DOCK7	ANGPTL3
861.55	PI(36:2)_[M-H]1-	Glycerophospholipids (GP)	Glycerophosphoinositols	Phosphatidylinositols (PI)	chr1:63070537:D	chr1:63070537	A / AGTTAATGTG	-0.0416	0.006	3.558e-12	DOCK7	ANGPTL3
861.55	PI(36:2)_[M-H]1-	Glycerophospholipids (GP)	Glycerophosphoinositols	Phosphatidylinositols (PI)	rs10789117	chr1:63072265	C / A	-0.0423	0.0059	9.766e-13	DOCK7	ANGPTL3
861.55	PI(36:2)_[M-H]1-	Glycerophospholipids (GP)	Glycerophosphoinositols	Phosphatidylinositols (PI)	chr1:63072867:D	chr1:63072867	C / CA	-0.0423	0.0059	9.766e-13	DOCK7	ANGPTL3
861.55	PI(36:2)_[M-H]1-	Glycerophospholipids (GP)	Glycerophosphoinositols	Phosphatidylinositols (PI)	rs6675401	chr1:63073975	T / C	-0.0423	0.0059	9.026e-13	DOCK7	ANGPTL3
861.55	PI(36:2)_[M-H]1-	Glycerophospholipids (GP)	Glycerophosphoinositols	Phosphatidylinositols (PI)	rs6678483	chr1:63074442	A / C	-0.0423	0.0059	9.026e-13	DOCK7	ANGPTL3
861.55	PI(36:2)_[M-H]1-	Glycerophospholipids (GP)	Glycerophosphoinositols	Phosphatidylinositols (PI)	chr1:63074527:D	chr1:63074527	C / CTCAT	-0.0399	0.006	2.998e-11	DOCK7	ANGPTL3
861.55	PI(36:2)_[M-H]1-	Glycerophospholipids (GP)	Glycerophosphoinositols	Phosphatidylinositols (PI)	rs10889347	chr1:63075826	A / G	-0.0423	0.0059	9.026e-13	DOCK7	ANGPTL3
861.55	PI(36:2)_[M-H]1-	Glycerophospholipids (GP)	Glycerophosphoinositols	Phosphatidylinositols (PI)	chr1:63078219:I	chr1:63078219	AT / A	-0.0399	0.006	2.998e-11	DOCK7	ANGPTL3
861.55	PI(36:2)_[M-H]1-	Glycerophospholipids (GP)	Glycerophosphoinositols	Phosphatidylinositols (PI)	rs10889348	chr1:63078222	T / A	-0.0399	0.006	2.958e-11	DOCK7	ANGPTL3
861.55	PI(36:2)_[M-H]1-	Glycerophospholipids (GP)	Glycerophosphoinositols	Phosphatidylinositols (PI)	rs10889349	chr1:63081919	G / A	-0.0422	0.0059	1.03e-12	DOCK7	ANGPTL3
861.55	PI(36:2)_[M-H]1-	Glycerophospholipids (GP)	Glycerophosphoinositols	Phosphatidylinositols (PI)	rs61471917	chr1:63084030	A / G	-0.0424	0.0059	8.342e-13	DOCK7	ANGPTL3
861.55	PI(36:2)_[M-H]1-	Glycerophospholipids (GP)	Glycerophosphoinositols	Phosphatidylinositols (PI)	rs10889350	chr1:63085266	T / C	-0.0424	0.0059	8.342e-13	DOCK7	ANGPTL3
861.55	PI(36:2)_[M-H]1-	Glycerophospholipids (GP)	Glycerophosphoinositols	Phosphatidylinositols (PI)	rs12239736	chr1:63085997	A / T	-0.0411	0.006	6.487e-12	DOCK7	ANGPTL3
861.55	PI(36:2)_[M-H]1-	Glycerophospholipids (GP)	Glycerophosphoinositols	Phosphatidylinositols (PI)	rs6587980	chr1:63090858	T / C	-0.0416	0.0059	2.133e-12	DOCK7	ANGPTL3
861.55	PI(36:2)_[M-H]1-	Glycerophospholipids (GP)	Glycerophosphoinositols	Phosphatidylinositols (PI)	rs10157265	chr1:63093617	T / C	-0.0424	0.0059	8.342e-13	DOCK7	ANGPTL3
861.55	PI(36:2)_[M-H]1-	Glycerophospholipids (GP)	Glycerophosphoinositols	Phosphatidylinositols (PI)	chr1:63093661:D	chr1:63093661	G / GT	-0.0408	0.0059	5.916e-12	DOCK7	ANGPTL3
861.55	PI(36:2)_[M-H]1-	Glycerophospholipids (GP)	Glycerophosphoinositols	Phosphatidylinositols (PI)	rs11485618	chr1:63094207	G / A	-0.0409	0.0059	4.428e-12	DOCK7	ANGPTL3
861.55	PI(36:2)_[M-H]1-	Glycerophospholipids (GP)	Glycerophosphoinositols	Phosphatidylinositols (PI)	rs10789118	chr1:63094692	G / A	-0.0408	0.0059	4.624e-12	DOCK7	ANGPTL3
861.55	PI(36:2)_[M-H]1-	Glycerophospholipids (GP)	Glycerophosphoinositols	Phosphatidylinositols (PI)	rs7520810	chr1:63095711	T / C	-0.0424	0.0059	8.342e-13	DOCK7	ANGPTL3
861.55	PI(36:2)_[M-H]1-	Glycerophospholipids (GP)	Glycerophosphoinositols	Phosphatidylinositols (PI)	rs12025800	chr1:63096781	G / C	-0.0424	0.0059	8.342e-13	DOCK7	ANGPTL3
861.55	PI(36:2)_[M-H]1-	Glycerophospholipids (GP)	Glycerophosphoinositols	Phosphatidylinositols (PI)	chr1:63097424:I	chr1:63097424	AG / A	-0.0427	0.0059	6.179e-13	DOCK7	ANGPTL3
861.55	PI(36:2)_[M-H]1-	Glycerophospholipids (GP)	Glycerophosphoinositols	Phosphatidylinositols (PI)	rs10789119	chr1:63098235	A / G	-0.0408	0.0059	4.624e-12	DOCK7	ANGPTL3
861.55	PI(36:2)_[M-H]1-	Glycerophospholipids (GP)	Glycerophosphoinositols	Phosphatidylinositols (PI)	rs11207999	chr1:63098641	C / A	-0.0422	0.0059	1.124e-12	DOCK7	ANGPTL3
861.55	PI(36:2)_[M-H]1-	Glycerophospholipids (GP)	Glycerophosphoinositols	Phosphatidylinositols (PI)	rs10889352	chr1:63099023	C / T	-0.0408	0.0059	4.624e-12	DOCK7	ANGPTL3
861.55	PI(36:2)_[M-H]1-	Glycerophospholipids (GP)	Glycerophosphoinositols	Phosphatidylinositols (PI)	rs2366638	chr1:63099577	A / G	-0.0424	0.0059	8.342e-13	DOCK7	ANGPTL3
861.55	PI(36:2)_[M-H]1-	Glycerophospholipids (GP)	Glycerophosphoinositols	Phosphatidylinositols (PI)	rs10789120	chr1:63101123	A / G	-0.0416	0.006	4.149e-12	DOCK7	ANGPTL3
861.55	PI(36:2)_[M-H]1-	Glycerophospholipids (GP)	Glycerophosphoinositols	Phosphatidylinositols (PI)	rs1570694	chr1:63103217	G / A	-0.0409	0.0059	4.285e-12	DOCK7	ANGPTL3
861.55	PI(36:2)_[M-H]1-	Glycerophospholipids (GP)	Glycerophosphoinositols	Phosphatidylinositols (PI)	rs6657050	chr1:63105253	G / A	-0.0444	0.006	1.627e-13	DOCK7	ANGPTL3
861.55	PI(36:2)_[M-H]1-	Glycerophospholipids (GP)	Glycerophosphoinositols	Phosphatidylinositols (PI)	rs12047226	chr1:63105538	C / T	-0.0409	0.0059	4.103e-12	DOCK7	ANGPTL3
861.55	PI(36:2)_[M-H]1-	Glycerophospholipids (GP)	Glycerophosphoinositols	Phosphatidylinositols (PI)	chr1:63106174:D	chr1:63106174	A / AAAGC	-0.0419	0.0061	4.605e-12	DOCK7	ANGPTL3
861.55	PI(36:2)_[M-H]1-	Glycerophospholipids (GP)	Glycerophosphoinositols	Phosphatidylinositols (PI)	rs7539035	chr1:63106767	A / C	-0.0424	0.0059	8.342e-13	DOCK7	ANGPTL3
861.55	PI(36:2)_[M-H]1-	Glycerophospholipids (GP)	Glycerophosphoinositols	Phosphatidylinositols (PI)	rs995000	chr1:63107526	T / C	-0.0408	0.0059	4.624e-12	DOCK7	ANGPTL3
861.55	PI(36:2)_[M-H]1-	Glycerophospholipids (GP)	Glycerophosphoinositols	Phosphatidylinositols (PI)	rs11208000	chr1:63108374	G / A	-0.0424	0.0059	8.342e-13	DOCK7	ANGPTL3
861.55	PI(36:2)_[M-H]1-	Glycerophospholipids (GP)	Glycerophosphoinositols	Phosphatidylinositols (PI)	chr1:63108680:D	chr1:63108680	A / AAGGCCACAAG	-0.0431	0.0059	4.167e-13	DOCK7	ANGPTL3
861.55	PI(36:2)_[M-H]1-	Glycerophospholipids (GP)	Glycerophosphoinositols	Phosphatidylinositols (PI)	rs993013	chr1:63111069	T / G	0.0421	0.0059	1.419e-12	DOCK7	ANGPTL3
861.55	PI(36:2)_[M-H]1-	Glycerophospholipids (GP)	Glycerophosphoinositols	Phosphatidylinositols (PI)	rs1168085	chr1:63112320	G / C	0.0423	0.006	1.815e-12	DOCK7	ANGPTL3
861.55	PI(36:2)_[M-H]1-	Glycerophospholipids (GP)	Glycerophosphoinositols	Phosphatidylinositols (PI)	rs1168086	chr1:63112389	G / A	0.0427	0.0059	5.51e-13	DOCK7	ANGPTL3
861.55	PI(36:2)_[M-H]1-	Glycerophospholipids (GP)	Glycerophosphoinositols	Phosphatidylinositols (PI)	rs746735	chr1:63113511	A / C	0.0427	0.0059	5.51e-13	DOCK7	ANGPTL3
861.55	PI(36:2)_[M-H]1-	Glycerophospholipids (GP)	Glycerophosphoinositols	Phosphatidylinositols (PI)	rs1168089	chr1:63113719	C / T	0.0427	0.0059	5.51e-13	DOCK7	ANGPTL3
861.55	PI(36:2)_[M-H]1-	Glycerophospholipids (GP)	Glycerophosphoinositols	Phosphatidylinositols (PI)	chr1:63116041:D	chr1:63116041	G / GA	0.0425	0.0059	7.122e-13	DOCK7	ANGPTL3
861.55	PI(36:2)_[M-H]1-	Glycerophospholipids (GP)	Glycerophosphoinositols	Phosphatidylinositols (PI)	rs1168093	chr1:63116227	A / G	0.0425	0.0059	7.444e-13	DOCK7	ANGPTL3
861.55	PI(36:2)_[M-H]1-	Glycerophospholipids (GP)	Glycerophosphoinositols	Phosphatidylinositols (PI)	rs10889353	chr1:63118196	C / A	-0.0408	0.0059	5.043e-12	DOCK7	ANGPTL3
861.55	PI(36:2)_[M-H]1-	Glycerophospholipids (GP)	Glycerophosphoinositols	Phosphatidylinositols (PI)	rs1168097	chr1:63120371	T / C	0.0425	0.0059	7.853e-13	DOCK7	ANGPTL3
861.55	PI(36:2)_[M-H]1-	Glycerophospholipids (GP)	Glycerophosphoinositols	Phosphatidylinositols (PI)	chr1:63121101:I	chr1:63121101	TC / T	0.0432	0.0061	9.685e-13	DOCK7	ANGPTL3
861.55	PI(36:2)_[M-H]1-	Glycerophospholipids (GP)	Glycerophosphoinositols	Phosphatidylinositols (PI)	rs1168098	chr1:63121294	A / G	0.0426	0.0059	6.878e-13	DOCK7	ANGPTL3
861.55	PI(36:2)_[M-H]1-	Glycerophospholipids (GP)	Glycerophosphoinositols	Phosphatidylinositols (PI)	rs1168099	chr1:63122859	A / C	0.0426	0.0059	6.878e-13	DOCK7	ANGPTL3
861.55	PI(36:2)_[M-H]1-	Glycerophospholipids (GP)	Glycerophosphoinositols	Phosphatidylinositols (PI)	rs4495740	chr1:63124465	G / T	-0.0408	0.0059	4.674e-12	DOCK7	ANGPTL3
861.55	PI(36:2)_[M-H]1-	Glycerophospholipids (GP)	Glycerophosphoinositols	Phosphatidylinositols (PI)	rs1168102	chr1:63127705	T / C	0.0426	0.0059	6.354e-13	DOCK7	ANGPTL3
861.55	PI(36:2)_[M-H]1-	Glycerophospholipids (GP)	Glycerophosphoinositols	Phosphatidylinositols (PI)	rs28641195	chr1:63128081	T / C	0.0426	0.0059	6.878e-13	DOCK7	ANGPTL3
861.55	PI(36:2)_[M-H]1-	Glycerophospholipids (GP)	Glycerophosphoinositols	Phosphatidylinositols (PI)	rs1168104	chr1:63128325	G / A	0.0426	0.0059	6.251e-13	DOCK7	ANGPTL3
861.55	PI(36:2)_[M-H]1-	Glycerophospholipids (GP)	Glycerophosphoinositols	Phosphatidylinositols (PI)	rs10889354	chr1:63129082	C / T	-0.0409	0.006	6.772e-12	DOCK7	ANGPTL3
861.55	PI(36:2)_[M-H]1-	Glycerophospholipids (GP)	Glycerophosphoinositols	Phosphatidylinositols (PI)	rs11208001	chr1:63130431	T / C	-0.0428	0.006	7.784e-13	DOCK7	ANGPTL3
861.55	PI(36:2)_[M-H]1-	Glycerophospholipids (GP)	Glycerophosphoinositols	Phosphatidylinositols (PI)	rs2479464	chr1:63130991	A / G	0.0427	0.0059	5.614e-13	DOCK7	ANGPTL3
861.55	PI(36:2)_[M-H]1-	Glycerophospholipids (GP)	Glycerophosphoinositols	Phosphatidylinositols (PI)	rs1168132	chr1:63133468	A / T	0.0423	0.006	1.815e-12	DOCK7	ANGPTL3
861.55	PI(36:2)_[M-H]1-	Glycerophospholipids (GP)	Glycerophosphoinositols	Phosphatidylinositols (PI)	rs4587594	chr1:63133930	A / G	-0.0411	0.0059	3.522e-12	DOCK7	ANGPTL3
861.55	PI(36:2)_[M-H]1-	Glycerophospholipids (GP)	Glycerophosphoinositols	Phosphatidylinositols (PI)	rs28399032	chr1:63135624	C / G	-0.042	0.006	2.256e-12	DOCK7	ANGPTL3
861.55	PI(36:2)_[M-H]1-	Glycerophospholipids (GP)	Glycerophosphoinositols	Phosphatidylinositols (PI)	rs1168128	chr1:63135846	G / C	0.0436	0.006	3.613e-13	DOCK7	ANGPTL3
861.55	PI(36:2)_[M-H]1-	Glycerophospholipids (GP)	Glycerophosphoinositols	Phosphatidylinositols (PI)	rs1168124	chr1:63139730	T / C	0.0426	0.0059	7.007e-13	DOCK7	ANGPTL3
861.55	PI(36:2)_[M-H]1-	Glycerophospholipids (GP)	Glycerophosphoinositols	Phosphatidylinositols (PI)	rs11208004	chr1:63145439	A / G	-0.0402	0.0059	1.373e-11	DOCK7	ANGPTL3
861.55	PI(36:2)_[M-H]1-	Glycerophospholipids (GP)	Glycerophosphoinositols	Phosphatidylinositols (PI)	rs7531579	chr1:63147040	C / A	-0.042	0.006	3.196e-12	DOCK7	ANGPTL3
861.55	PI(36:2)_[M-H]1-	Glycerophospholipids (GP)	Glycerophosphoinositols	Phosphatidylinositols (PI)	chr1:63153199:D	chr1:63153199	T / TCAGAA	-0.0417	0.006	3.653e-12	DOCK7	ANGPTL3
861.55	PI(36:2)_[M-H]1-	Glycerophospholipids (GP)	Glycerophosphoinositols	Phosphatidylinositols (PI)	rs4344355	chr1:63153953	T / C	-0.0417	0.006	3.551e-12	DOCK7	ANGPTL3
861.55	PI(36:2)_[M-H]1-	Glycerophospholipids (GP)	Glycerophosphoinositols	Phosphatidylinositols (PI)	rs10889356	chr1:63155349	A / G	-0.0414	0.006	4.276e-12	DOCK7	ANGPTL3
861.55	PI(36:2)_[M-H]1-	Glycerophospholipids (GP)	Glycerophosphoinositols	Phosphatidylinositols (PI)	rs1168114	chr1:63156043	G / A	0.0424	0.0059	1.013e-12	DOCK7	ANGPTL3
861.55	PI(36:2)_[M-H]1-	Glycerophospholipids (GP)	Glycerophosphoinositols	Phosphatidylinositols (PI)	rs1168113	chr1:63156098	C / T	0.0414	0.0059	2.324e-12	DOCK7	ANGPTL3
861.55	PI(36:2)_[M-H]1-	Glycerophospholipids (GP)	Glycerophosphoinositols	Phosphatidylinositols (PI)	chr1:63159212:D	chr1:63159212	T / TA	0.0404	0.006	1.704e-11	DOCK7	ANGPTL3
861.55	PI(36:2)_[M-H]1-	Glycerophospholipids (GP)	Glycerophosphoinositols	Phosphatidylinositols (PI)	rs10889357	chr1:63160282	T / C	-0.0405	0.006	1.317e-11	DOCK7	ANGPTL3
861.55	PI(36:2)_[M-H]1-	Glycerophospholipids (GP)	Glycerophosphoinositols	Phosphatidylinositols (PI)	rs1168107	chr1:63161173	T / A	0.0414	0.0059	3.58e-12	DOCK7	ANGPTL3
861.55	PI(36:2)_[M-H]1-	Glycerophospholipids (GP)	Glycerophosphoinositols	Phosphatidylinositols (PI)	rs12136083	chr1:63163073	C / T	-0.0398	0.006	2.729e-11	DOCK7	ANGPTL3
861.55	PI(36:2)_[M-H]1-	Glycerophospholipids (GP)	Glycerophosphoinositols	Phosphatidylinositols (PI)	rs144834675	chr1:63169866	C / T	0.0416	0.0059	2.237e-12	DOCK7	ANGPTL3
861.55	PI(36:2)_[M-H]1-	Glycerophospholipids (GP)	Glycerophosphoinositols	Phosphatidylinositols (PI)	rs6682423	chr1:63171063	T / C	0.0416	0.0059	2.147e-12	DOCK7	ANGPTL3
861.55	PI(36:2)_[M-H]1-	Glycerophospholipids (GP)	Glycerophosphoinositols	Phosphatidylinositols (PI)	rs6666816	chr1:63171199	T / C	0.0416	0.0059	2.147e-12	DOCK7	ANGPTL3
861.55	PI(36:2)_[M-H]1-	Glycerophospholipids (GP)	Glycerophosphoinositols	Phosphatidylinositols (PI)	rs880694	chr1:63173284	T / C	0.0417	0.0059	1.987e-12	DOCK7	ANGPTL3
861.55	PI(36:2)_[M-H]1-	Glycerophospholipids (GP)	Glycerophosphoinositols	Phosphatidylinositols (PI)	rs10889360	chr1:63173918	T / C	-0.0407	0.006	7.894e-12	DOCK7	ANGPTL3
861.55	PI(36:2)_[M-H]1-	Glycerophospholipids (GP)	Glycerophosphoinositols	Phosphatidylinositols (PI)	rs11208007	chr1:63176083	T / A	-0.0408	0.006	7.795e-12	DOCK7	ANGPTL3
861.55	PI(36:2)_[M-H]1-	Glycerophospholipids (GP)	Glycerophosphoinositols	Phosphatidylinositols (PI)	rs4409689	chr1:63177365	T / C	0.0416	0.0059	2.32e-12	DOCK7	ANGPTL3
861.55	PI(36:2)_[M-H]1-	Glycerophospholipids (GP)	Glycerophosphoinositols	Phosphatidylinositols (PI)	rs7518497	chr1:63177696	C / A	-0.0406	0.006	9.15e-12	DOCK7	ANGPTL3
861.55	PI(36:2)_[M-H]1-	Glycerophospholipids (GP)	Glycerophosphoinositols	Phosphatidylinositols (PI)	rs9787151	chr1:63179138	T / C	0.0416	0.0059	2.147e-12	DOCK7	ANGPTL3
861.55	PI(36:2)_[M-H]1-	Glycerophospholipids (GP)	Glycerophosphoinositols	Phosphatidylinositols (PI)	rs9787156	chr1:63179212	A / G	0.0415	0.0059	2.507e-12	DOCK7	ANGPTL3
861.55	PI(36:2)_[M-H]1-	Glycerophospholipids (GP)	Glycerophosphoinositols	Phosphatidylinositols (PI)	rs6686331	chr1:63182135	T / C	0.0418	0.0059	1.685e-12	DOCK7	ANGPTL3
861.55	PI(36:2)_[M-H]1-	Glycerophospholipids (GP)	Glycerophosphoinositols	Phosphatidylinositols (PI)	rs4915853	chr1:63191577	A / C	0.0409	0.0059	3.346e-12	DOCK7	ANGPTL3
861.55	PI(36:2)_[M-H]1-	Glycerophospholipids (GP)	Glycerophosphoinositols	Phosphatidylinositols (PI)	rs11208009	chr1:63195692	T / C	0.0397	0.0059	1.416e-11	DOCK7	ANGPTL3
861.55	PI(36:2)_[M-H]1-	Glycerophospholipids (GP)	Glycerophosphoinositols	Phosphatidylinositols (PI)	chr1:63199347:D	chr1:63199347	T / TG	0.0396	0.0059	2.952e-11	DOCK7	ANGPTL3
861.55	PI(36:2)_[M-H]1-	Glycerophospholipids (GP)	Glycerophosphoinositols	Phosphatidylinositols (PI)	chr1:63199351:D	chr1:63199351	G / GT	0.0396	0.0059	2.835e-11	DOCK7	ANGPTL3
861.55	PI(36:2)_[M-H]1-	Glycerophospholipids (GP)	Glycerophosphoinositols	Phosphatidylinositols (PI)	rs6679002	chr1:63199936	T / G	0.0398	0.0059	2.134e-11	DOCK7	ANGPTL3
673.529	SM(33:1)_[M-CH3]1-	Sphingolipids (SP)	Phosphosphingolipids	Sphingomyelins (SM)	rs1260326	chr2:27730940	C / T	0.0425	0.0067	2.199e-10	GCKR	GCKR
745.622	SM(37:1)_[M+H]1+	Sphingolipids (SP)	Phosphosphingolipids	Sphingomyelins (SM)	rs1260326	chr2:27730940	C / T	0.0456	0.007	5.473e-11	GCKR	GCKR
745.622	SM(37:1)_[M+H]1+	Sphingolipids (SP)	Phosphosphingolipids	Sphingomyelins (SM)	rs780094	chr2:27741237	C / T	0.0428	0.007	8.034e-10	GCKR	GCKR
745.622	SM(37:1)_[M+H]1+	Sphingolipids (SP)	Phosphosphingolipids	Sphingomyelins (SM)	rs780093	chr2:27742603	C / T	0.0427	0.007	8.89e-10	GCKR	GCKR
863.581	PA(44:6)_[M+OAc]1- / PG(43:6)_[M-H]1-	Glycerophospholipids (GP)	Glycerophosphates	Phosphatidates (PA)	rs6770560	chr3:142657761	G / A	0.0772	0.0124	5.45e-10	LOC100507389	LOC100507389
863.581	PA(44:6)_[M+OAc]1- / PG(43:6)_[M-H]1-	Glycerophospholipids (GP)	Glycerophosphates	Phosphatidates (PA)	rs9821138	chr3:142659837	G / A	0.0783	0.0125	3.957e-10	LOC100507389	LOC100507389
863.581	PA(44:6)_[M+OAc]1- / PG(43:6)_[M-H]1-	Glycerophospholipids (GP)	Glycerophosphates	Phosphatidates (PA)	chr3:142660022:D	chr3:142660022	A / ATTCAGTAG	0.0784	0.0125	3.707e-10	LOC100507389	LOC100507389
863.581	PA(44:6)_[M+OAc]1- / PG(43:6)_[M-H]1-	Glycerophospholipids (GP)	Glycerophosphates	Phosphatidates (PA)	rs7650847	chr3:142663207	C / T	0.0778	0.0127	8.305e-10	LOC100507389	LOC100507389
863.581	PA(44:6)_[M+OAc]1- / PG(43:6)_[M-H]1-	Glycerophospholipids (GP)	Glycerophosphates	Phosphatidates (PA)	rs4683715	chr3:142664819	G / A	0.0794	0.0126	3.431e-10	LOC100507389	LOC100507389
779.508	PG(32:1)_[M+OAc]1-	Glycerophospholipids (GP)	Glycerophosphoglycerols	Phosphatidylglycerols (PG)	rs72676244	chr4:115400324	G / A	0.1278	0.0174	2.165e-13	UGT8	UGT8
779.508	PG(32:1)_[M+OAc]1-	Glycerophospholipids (GP)	Glycerophosphoglycerols	Phosphatidylglycerols (PG)	chr4:115400726:D	chr4:115400726	C / CT	0.1044	0.0167	3.864e-10	UGT8	UGT8
779.508	PG(32:1)_[M+OAc]1-	Glycerophospholipids (GP)	Glycerophosphoglycerols	Phosphatidylglycerols (PG)	rs62309866	chr4:115400739	A / G	-0.1039	0.0167	4.507e-10	UGT8	UGT8
779.508	PG(32:1)_[M+OAc]1-	Glycerophospholipids (GP)	Glycerophosphoglycerols	Phosphatidylglycerols (PG)	rs7685549	chr4:115400928	G / A	-0.1041	0.0166	3.789e-10	UGT8	UGT8
779.508	PG(32:1)_[M+OAc]1-	Glycerophospholipids (GP)	Glycerophosphoglycerols	Phosphatidylglycerols (PG)	rs7686774	chr4:115401513	G / A	-0.1041	0.0166	3.615e-10	UGT8	UGT8
779.508	PG(32:1)_[M+OAc]1-	Glycerophospholipids (GP)	Glycerophosphoglycerols	Phosphatidylglycerols (PG)	rs7687413	chr4:115401573	T / G	-0.104	0.0166	4.157e-10	UGT8	UGT8
779.508	PG(32:1)_[M+OAc]1-	Glycerophospholipids (GP)	Glycerophosphoglycerols	Phosphatidylglycerols (PG)	rs7665675	chr4:115401860	C / T	-0.104	0.0166	3.7e-10	UGT8	UGT8
779.508	PG(32:1)_[M+OAc]1-	Glycerophospholipids (GP)	Glycerophosphoglycerols	Phosphatidylglycerols (PG)	rs7692571	chr4:115401948	A / G	-0.104	0.0166	3.7e-10	UGT8	UGT8
779.508	PG(32:1)_[M+OAc]1-	Glycerophospholipids (GP)	Glycerophosphoglycerols	Phosphatidylglycerols (PG)	rs62309868	chr4:115402598	C / T	0.1278	0.0173	1.587e-13	UGT8	UGT8
779.508	PG(32:1)_[M+OAc]1-	Glycerophospholipids (GP)	Glycerophosphoglycerols	Phosphatidylglycerols (PG)	rs11724670	chr4:115403278	T / G	-0.1025	0.0166	5.908e-10	UGT8	UGT8
779.508	PG(32:1)_[M+OAc]1-	Glycerophospholipids (GP)	Glycerophosphoglycerols	Phosphatidylglycerols (PG)	rs11724674	chr4:115403331	A / G	-0.104	0.0166	3.788e-10	UGT8	UGT8
779.508	PG(32:1)_[M+OAc]1-	Glycerophospholipids (GP)	Glycerophosphoglycerols	Phosphatidylglycerols (PG)	rs10002657	chr4:115404276	A / G	-0.1025	0.0166	5.908e-10	UGT8	UGT8
779.508	PG(32:1)_[M+OAc]1-	Glycerophospholipids (GP)	Glycerophosphoglycerols	Phosphatidylglycerols (PG)	rs6849064	chr4:115404963	G / A	-0.1271	0.0173	2.23e-13	UGT8	UGT8
779.508	PG(32:1)_[M+OAc]1-	Glycerophospholipids (GP)	Glycerophosphoglycerols	Phosphatidylglycerols (PG)	rs1460770	chr4:115405345	A / C	0.1281	0.0173	1.391e-13	UGT8	UGT8
779.508	PG(32:1)_[M+OAc]1-	Glycerophospholipids (GP)	Glycerophosphoglycerols	Phosphatidylglycerols (PG)	rs6850121	chr4:115405450	G / A	-0.1266	0.0173	2.354e-13	UGT8	UGT8
779.508	PG(32:1)_[M+OAc]1-	Glycerophospholipids (GP)	Glycerophosphoglycerols	Phosphatidylglycerols (PG)	rs28564476	chr4:115405748	T / C	-0.1273	0.0173	2.012e-13	UGT8	UGT8
779.508	PG(32:1)_[M+OAc]1-	Glycerophospholipids (GP)	Glycerophosphoglycerols	Phosphatidylglycerols (PG)	rs922199	chr4:115406518	G / A	-0.1271	0.0173	2.193e-13	UGT8	UGT8
779.508	PG(32:1)_[M+OAc]1-	Glycerophospholipids (GP)	Glycerophosphoglycerols	Phosphatidylglycerols (PG)	rs1551742	chr4:115407050	T / C	-0.1273	0.0173	2.012e-13	UGT8	UGT8
779.508	PG(32:1)_[M+OAc]1-	Glycerophospholipids (GP)	Glycerophosphoglycerols	Phosphatidylglycerols (PG)	rs10516602	chr4:115407330	T / C	-0.1042	0.0166	3.106e-10	UGT8	UGT8
779.508	PG(32:1)_[M+OAc]1-	Glycerophospholipids (GP)	Glycerophosphoglycerols	Phosphatidylglycerols (PG)	rs1460771	chr4:115407911	C / T	-0.1041	0.0166	3.157e-10	UGT8	UGT8
779.508	PG(32:1)_[M+OAc]1-	Glycerophospholipids (GP)	Glycerophosphoglycerols	Phosphatidylglycerols (PG)	rs1460772	chr4:115408184	T / C	-0.1041	0.0166	3.232e-10	UGT8	UGT8
779.508	PG(32:1)_[M+OAc]1-	Glycerophospholipids (GP)	Glycerophosphoglycerols	Phosphatidylglycerols (PG)	rs10028232	chr4:115408800	A / G	-0.1041	0.0166	3.157e-10	UGT8	UGT8
779.508	PG(32:1)_[M+OAc]1-	Glycerophospholipids (GP)	Glycerophosphoglycerols	Phosphatidylglycerols (PG)	rs7671026	chr4:115408892	A / C	-0.1041	0.0166	3.232e-10	UGT8	UGT8
779.508	PG(32:1)_[M+OAc]1-	Glycerophospholipids (GP)	Glycerophosphoglycerols	Phosphatidylglycerols (PG)	rs12641633	chr4:115409342	G / T	0.1277	0.0173	1.698e-13	UGT8	UGT8
779.508	PG(32:1)_[M+OAc]1-	Glycerophospholipids (GP)	Glycerophosphoglycerols	Phosphatidylglycerols (PG)	rs10031142	chr4:115409589	A / G	-0.1041	0.0166	3.232e-10	UGT8	UGT8
779.508	PG(32:1)_[M+OAc]1-	Glycerophospholipids (GP)	Glycerophosphoglycerols	Phosphatidylglycerols (PG)	chr4:115409992:D	chr4:115409992	C / CTATTACTATGTTAA	-0.1041	0.0166	3.189e-10	UGT8	UGT8
779.508	PG(32:1)_[M+OAc]1-	Glycerophospholipids (GP)	Glycerophosphoglycerols	Phosphatidylglycerols (PG)	rs17678686	chr4:115410256	A / G	-0.1041	0.0166	3.232e-10	UGT8	UGT8
779.508	PG(32:1)_[M+OAc]1-	Glycerophospholipids (GP)	Glycerophosphoglycerols	Phosphatidylglycerols (PG)	rs28766989	chr4:115410908	T / C	-0.1041	0.0166	3.232e-10	UGT8	UGT8
779.508	PG(32:1)_[M+OAc]1-	Glycerophospholipids (GP)	Glycerophosphoglycerols	Phosphatidylglycerols (PG)	rs13105730	chr4:115411177	A / G	-0.1272	0.0173	2.136e-13	UGT8	UGT8
779.508	PG(32:1)_[M+OAc]1-	Glycerophospholipids (GP)	Glycerophosphoglycerols	Phosphatidylglycerols (PG)	rs11722125	chr4:115411530	G / C	-0.1041	0.0166	3.232e-10	UGT8	UGT8
779.508	PG(32:1)_[M+OAc]1-	Glycerophospholipids (GP)	Glycerophosphoglycerols	Phosphatidylglycerols (PG)	rs11722201	chr4:115411733	T / C	-0.1042	0.0166	3.011e-10	UGT8	UGT8
779.508	PG(32:1)_[M+OAc]1-	Glycerophospholipids (GP)	Glycerophosphoglycerols	Phosphatidylglycerols (PG)	rs1599316	chr4:115411858	G / T	-0.1028	0.0166	5.228e-10	UGT8	UGT8
779.508	PG(32:1)_[M+OAc]1-	Glycerophospholipids (GP)	Glycerophosphoglycerols	Phosphatidylglycerols (PG)	rs1585446	chr4:115412027	C / T	-0.1029	0.0166	5.108e-10	UGT8	UGT8
779.508	PG(32:1)_[M+OAc]1-	Glycerophospholipids (GP)	Glycerophosphoglycerols	Phosphatidylglycerols (PG)	rs4833457	chr4:115412047	A / G	0.1278	0.0173	1.642e-13	UGT8	UGT8
779.508	PG(32:1)_[M+OAc]1-	Glycerophospholipids (GP)	Glycerophosphoglycerols	Phosphatidylglycerols (PG)	rs1585447	chr4:115412068	C / G	-0.1046	0.0166	2.829e-10	UGT8	UGT8
779.508	PG(32:1)_[M+OAc]1-	Glycerophospholipids (GP)	Glycerophosphoglycerols	Phosphatidylglycerols (PG)	rs1585448	chr4:115412206	T / G	-0.1047	0.0166	2.553e-10	UGT8	UGT8
779.508	PG(32:1)_[M+OAc]1-	Glycerophospholipids (GP)	Glycerophosphoglycerols	Phosphatidylglycerols (PG)	rs1870655	chr4:115412781	T / C	-0.1047	0.0166	2.494e-10	UGT8	UGT8
779.508	PG(32:1)_[M+OAc]1-	Glycerophospholipids (GP)	Glycerophosphoglycerols	Phosphatidylglycerols (PG)	rs2219591	chr4:115413058	T / G	-0.1047	0.0166	2.494e-10	UGT8	UGT8
779.508	PG(32:1)_[M+OAc]1-	Glycerophospholipids (GP)	Glycerophosphoglycerols	Phosphatidylglycerols (PG)	rs2199310	chr4:115413402	A / G	-0.1047	0.0166	2.494e-10	UGT8	UGT8
779.508	PG(32:1)_[M+OAc]1-	Glycerophospholipids (GP)	Glycerophosphoglycerols	Phosphatidylglycerols (PG)	rs2199311	chr4:115413444	C / T	-0.1034	0.0166	4.141e-10	UGT8	UGT8
779.508	PG(32:1)_[M+OAc]1-	Glycerophospholipids (GP)	Glycerophosphoglycerols	Phosphatidylglycerols (PG)	rs7698391	chr4:115413613	G / A	-0.1048	0.0166	2.443e-10	UGT8	UGT8
779.508	PG(32:1)_[M+OAc]1-	Glycerophospholipids (GP)	Glycerophosphoglycerols	Phosphatidylglycerols (PG)	rs7698790	chr4:115413803	G / A	-0.1044	0.0166	2.873e-10	UGT8	UGT8
779.508	PG(32:1)_[M+OAc]1-	Glycerophospholipids (GP)	Glycerophosphoglycerols	Phosphatidylglycerols (PG)	rs13102706	chr4:115414154	C / T	-0.1045	0.0166	2.703e-10	UGT8	UGT8
779.508	PG(32:1)_[M+OAc]1-	Glycerophospholipids (GP)	Glycerophosphoglycerols	Phosphatidylglycerols (PG)	rs13102910	chr4:115414205	A / T	-0.1058	0.0166	1.745e-10	UGT8	UGT8
779.508	PG(32:1)_[M+OAc]1-	Glycerophospholipids (GP)	Glycerophosphoglycerols	Phosphatidylglycerols (PG)	rs13127839	chr4:115414215	A / G	-0.1056	0.0166	1.888e-10	UGT8	UGT8
779.508	PG(32:1)_[M+OAc]1-	Glycerophospholipids (GP)	Glycerophosphoglycerols	Phosphatidylglycerols (PG)	rs13103158	chr4:115414344	C / T	-0.1046	0.0166	2.677e-10	UGT8	UGT8
779.508	PG(32:1)_[M+OAc]1-	Glycerophospholipids (GP)	Glycerophosphoglycerols	Phosphatidylglycerols (PG)	rs13127680	chr4:115414373	G / A	-0.1046	0.0166	2.677e-10	UGT8	UGT8
779.508	PG(32:1)_[M+OAc]1-	Glycerophospholipids (GP)	Glycerophosphoglycerols	Phosphatidylglycerols (PG)	rs4834415	chr4:115414401	A / G	-0.1046	0.0166	2.677e-10	UGT8	UGT8
779.508	PG(32:1)_[M+OAc]1-	Glycerophospholipids (GP)	Glycerophosphoglycerols	Phosphatidylglycerols (PG)	chr4:115414433:D	chr4:115414433	A / ATAT	0.1278	0.0173	1.599e-13	UGT8	UGT8
779.508	PG(32:1)_[M+OAc]1-	Glycerophospholipids (GP)	Glycerophosphoglycerols	Phosphatidylglycerols (PG)	rs4833458	chr4:115414727	G / A	-0.1049	0.0166	2.378e-10	UGT8	UGT8
779.508	PG(32:1)_[M+OAc]1-	Glycerophospholipids (GP)	Glycerophosphoglycerols	Phosphatidylglycerols (PG)	rs4833459	chr4:115414890	A / G	-0.1049	0.0166	2.378e-10	UGT8	UGT8
779.508	PG(32:1)_[M+OAc]1-	Glycerophospholipids (GP)	Glycerophosphoglycerols	Phosphatidylglycerols (PG)	rs4834416	chr4:115414986	G / A	-0.1046	0.0166	2.784e-10	UGT8	UGT8
779.508	PG(32:1)_[M+OAc]1-	Glycerophospholipids (GP)	Glycerophosphoglycerols	Phosphatidylglycerols (PG)	rs12501292	chr4:115415032	C / T	-0.105	0.0166	2.4e-10	UGT8	UGT8
779.508	PG(32:1)_[M+OAc]1-	Glycerophospholipids (GP)	Glycerophosphoglycerols	Phosphatidylglycerols (PG)	rs12512563	chr4:115415129	T / C	-0.1044	0.0166	2.806e-10	UGT8	UGT8
779.508	PG(32:1)_[M+OAc]1-	Glycerophospholipids (GP)	Glycerophosphoglycerols	Phosphatidylglycerols (PG)	rs12504927	chr4:115415131	C / A	-0.1044	0.0166	2.806e-10	UGT8	UGT8
779.508	PG(32:1)_[M+OAc]1-	Glycerophospholipids (GP)	Glycerophosphoglycerols	Phosphatidylglycerols (PG)	rs13147121	chr4:115415150	G / A	-0.1044	0.0166	2.806e-10	UGT8	UGT8
779.508	PG(32:1)_[M+OAc]1-	Glycerophospholipids (GP)	Glycerophosphoglycerols	Phosphatidylglycerols (PG)	rs13147488	chr4:115415207	T / C	-0.1049	0.0166	2.378e-10	UGT8	UGT8
779.508	PG(32:1)_[M+OAc]1-	Glycerophospholipids (GP)	Glycerophosphoglycerols	Phosphatidylglycerols (PG)	rs12711027	chr4:115415360	A / T	-0.1049	0.0166	2.378e-10	UGT8	UGT8
779.508	PG(32:1)_[M+OAc]1-	Glycerophospholipids (GP)	Glycerophosphoglycerols	Phosphatidylglycerols (PG)	rs13148430	chr4:115415625	T / C	-0.1049	0.0166	2.378e-10	UGT8	UGT8
779.508	PG(32:1)_[M+OAc]1-	Glycerophospholipids (GP)	Glycerophosphoglycerols	Phosphatidylglycerols (PG)	rs6839599	chr4:115415910	G / A	-0.1043	0.0166	3.092e-10	UGT8	UGT8
779.508	PG(32:1)_[M+OAc]1-	Glycerophospholipids (GP)	Glycerophosphoglycerols	Phosphatidylglycerols (PG)	rs6840798	chr4:115416234	T / G	-0.1056	0.0166	2.23e-10	UGT8	UGT8
779.508	PG(32:1)_[M+OAc]1-	Glycerophospholipids (GP)	Glycerophosphoglycerols	Phosphatidylglycerols (PG)	rs6817762	chr4:115416254	C / T	-0.1062	0.0166	1.668e-10	UGT8	UGT8
779.508	PG(32:1)_[M+OAc]1-	Glycerophospholipids (GP)	Glycerophosphoglycerols	Phosphatidylglycerols (PG)	rs13103833	chr4:115416570	G / A	-0.1049	0.0166	2.323e-10	UGT8	UGT8
779.508	PG(32:1)_[M+OAc]1-	Glycerophospholipids (GP)	Glycerophosphoglycerols	Phosphatidylglycerols (PG)	chr4:115416673:D	chr4:115416673	A / AAAAG	0.1273	0.0173	2.172e-13	UGT8	UGT8
779.508	PG(32:1)_[M+OAc]1-	Glycerophospholipids (GP)	Glycerophosphoglycerols	Phosphatidylglycerols (PG)	rs13104656	chr4:115416703	A / G	-0.1049	0.0166	2.323e-10	UGT8	UGT8
779.508	PG(32:1)_[M+OAc]1-	Glycerophospholipids (GP)	Glycerophosphoglycerols	Phosphatidylglycerols (PG)	rs13104685	chr4:115416746	A / G	-0.1049	0.0166	2.323e-10	UGT8	UGT8
779.508	PG(32:1)_[M+OAc]1-	Glycerophospholipids (GP)	Glycerophosphoglycerols	Phosphatidylglycerols (PG)	rs13104693	chr4:115416756	T / G	-0.1049	0.0166	2.323e-10	UGT8	UGT8
779.508	PG(32:1)_[M+OAc]1-	Glycerophospholipids (GP)	Glycerophosphoglycerols	Phosphatidylglycerols (PG)	rs7662125	chr4:115416862	C / T	-0.105	0.0166	2.287e-10	UGT8	UGT8
779.508	PG(32:1)_[M+OAc]1-	Glycerophospholipids (GP)	Glycerophosphoglycerols	Phosphatidylglycerols (PG)	rs7689158	chr4:115416926	A / G	-0.1048	0.0166	2.435e-10	UGT8	UGT8
779.508	PG(32:1)_[M+OAc]1-	Glycerophospholipids (GP)	Glycerophosphoglycerols	Phosphatidylglycerols (PG)	rs2054303	chr4:115416959	C / T	-0.105	0.0166	2.287e-10	UGT8	UGT8
779.508	PG(32:1)_[M+OAc]1-	Glycerophospholipids (GP)	Glycerophosphoglycerols	Phosphatidylglycerols (PG)	rs2054304	chr4:115417058	C / G	-0.1049	0.0166	2.342e-10	UGT8	UGT8
779.508	PG(32:1)_[M+OAc]1-	Glycerophospholipids (GP)	Glycerophosphoglycerols	Phosphatidylglycerols (PG)	rs2054305	chr4:115417331	G / C	-0.105	0.0166	2.217e-10	UGT8	UGT8
779.508	PG(32:1)_[M+OAc]1-	Glycerophospholipids (GP)	Glycerophosphoglycerols	Phosphatidylglycerols (PG)	rs2054306	chr4:115417360	T / A	-0.105	0.0166	2.217e-10	UGT8	UGT8
779.508	PG(32:1)_[M+OAc]1-	Glycerophospholipids (GP)	Glycerophosphoglycerols	Phosphatidylglycerols (PG)	rs11931563	chr4:115417683	A / G	0.1271	0.0173	2.218e-13	UGT8	UGT8
779.508	PG(32:1)_[M+OAc]1-	Glycerophospholipids (GP)	Glycerophosphoglycerols	Phosphatidylglycerols (PG)	rs2035059	chr4:115417686	G / A	-0.105	0.0166	2.217e-10	UGT8	UGT8
779.508	PG(32:1)_[M+OAc]1-	Glycerophospholipids (GP)	Glycerophosphoglycerols	Phosphatidylglycerols (PG)	rs12502750	chr4:115420350	T / C	0.1265	0.0173	2.818e-13	UGT8	UGT8
779.508	PG(32:1)_[M+OAc]1-	Glycerophospholipids (GP)	Glycerophosphoglycerols	Phosphatidylglycerols (PG)	rs7654273	chr4:115422387	C / T	-0.1273	0.0173	1.997e-13	UGT8	UGT8
779.508	PG(32:1)_[M+OAc]1-	Glycerophospholipids (GP)	Glycerophosphoglycerols	Phosphatidylglycerols (PG)	rs6839138	chr4:115422949	G / A	-0.1272	0.0173	2.1e-13	UGT8	UGT8
779.508	PG(32:1)_[M+OAc]1-	Glycerophospholipids (GP)	Glycerophosphoglycerols	Phosphatidylglycerols (PG)	rs6839694	chr4:115423197	G / A	-0.1257	0.0173	4.057e-13	UGT8	UGT8
779.508	PG(32:1)_[M+OAc]1-	Glycerophospholipids (GP)	Glycerophosphoglycerols	Phosphatidylglycerols (PG)	rs1599317	chr4:115424166	G / A	-0.1036	0.0166	3.864e-10	UGT8	UGT8
779.508	PG(32:1)_[M+OAc]1-	Glycerophospholipids (GP)	Glycerophosphoglycerols	Phosphatidylglycerols (PG)	rs7674990	chr4:115427623	T / G	0.1279	0.0173	1.557e-13	UGT8	UGT8
779.508	PG(32:1)_[M+OAc]1-	Glycerophospholipids (GP)	Glycerophosphoglycerols	Phosphatidylglycerols (PG)	rs10015704	chr4:115429128	A / C	-0.1275	0.0173	1.877e-13	UGT8	UGT8
779.508	PG(32:1)_[M+OAc]1-	Glycerophospholipids (GP)	Glycerophosphoglycerols	Phosphatidylglycerols (PG)	rs7665770	chr4:115429539	C / T	-0.1275	0.0173	1.877e-13	UGT8	UGT8
779.508	PG(32:1)_[M+OAc]1-	Glycerophospholipids (GP)	Glycerophosphoglycerols	Phosphatidylglycerols (PG)	rs36096691	chr4:115430926	G / A	0.1277	0.0173	1.667e-13	UGT8	UGT8
779.508	PG(32:1)_[M+OAc]1-	Glycerophospholipids (GP)	Glycerophosphoglycerols	Phosphatidylglycerols (PG)	rs993460	chr4:115431677	C / A	-0.1051	0.0166	2.132e-10	UGT8	UGT8
779.508	PG(32:1)_[M+OAc]1-	Glycerophospholipids (GP)	Glycerophosphoglycerols	Phosphatidylglycerols (PG)	rs7686100	chr4:115432826	C / T	-0.1051	0.0166	2.165e-10	UGT8	UGT8
779.508	PG(32:1)_[M+OAc]1-	Glycerophospholipids (GP)	Glycerophosphoglycerols	Phosphatidylglycerols (PG)	rs4409025	chr4:115432941	G / A	-0.105	0.0166	2.418e-10	UGT8	UGT8
779.508	PG(32:1)_[M+OAc]1-	Glycerophospholipids (GP)	Glycerophosphoglycerols	Phosphatidylglycerols (PG)	rs4409026	chr4:115432943	G / A	-0.1052	0.0166	2.113e-10	UGT8	UGT8
779.508	PG(32:1)_[M+OAc]1-	Glycerophospholipids (GP)	Glycerophosphoglycerols	Phosphatidylglycerols (PG)	rs4295329	chr4:115433101	C / A	-0.1051	0.0166	2.165e-10	UGT8	UGT8
779.508	PG(32:1)_[M+OAc]1-	Glycerophospholipids (GP)	Glycerophosphoglycerols	Phosphatidylglycerols (PG)	rs4409027	chr4:115433141	T / A	-0.1051	0.0166	2.165e-10	UGT8	UGT8
779.508	PG(32:1)_[M+OAc]1-	Glycerophospholipids (GP)	Glycerophosphoglycerols	Phosphatidylglycerols (PG)	rs4413472	chr4:115433246	G / A	-0.1051	0.0166	2.165e-10	UGT8	UGT8
779.508	PG(32:1)_[M+OAc]1-	Glycerophospholipids (GP)	Glycerophosphoglycerols	Phosphatidylglycerols (PG)	rs11936113	chr4:115433380	G / A	-0.1051	0.0166	2.165e-10	UGT8	UGT8
779.508	PG(32:1)_[M+OAc]1-	Glycerophospholipids (GP)	Glycerophosphoglycerols	Phosphatidylglycerols (PG)	rs11936150	chr4:115433547	G / A	-0.1051	0.0166	2.165e-10	UGT8	UGT8
779.508	PG(32:1)_[M+OAc]1-	Glycerophospholipids (GP)	Glycerophosphoglycerols	Phosphatidylglycerols (PG)	rs28361366	chr4:115433965	C / T	-0.1051	0.0166	2.165e-10	UGT8	UGT8
779.508	PG(32:1)_[M+OAc]1-	Glycerophospholipids (GP)	Glycerophosphoglycerols	Phosphatidylglycerols (PG)	rs28656197	chr4:115433977	G / A	-0.1051	0.0166	2.165e-10	UGT8	UGT8
779.508	PG(32:1)_[M+OAc]1-	Glycerophospholipids (GP)	Glycerophosphoglycerols	Phosphatidylglycerols (PG)	chr4:115434152:I	chr4:115434152	AT / A	-0.1051	0.0166	2.165e-10	UGT8	UGT8
779.508	PG(32:1)_[M+OAc]1-	Glycerophospholipids (GP)	Glycerophosphoglycerols	Phosphatidylglycerols (PG)	rs2199312	chr4:115434478	A / G	-0.1053	0.0166	2.016e-10	UGT8	UGT8
779.508	PG(32:1)_[M+OAc]1-	Glycerophospholipids (GP)	Glycerophosphoglycerols	Phosphatidylglycerols (PG)	rs2199314	chr4:115434711	T / C	-0.1046	0.0166	2.836e-10	UGT8	UGT8
779.508	PG(32:1)_[M+OAc]1-	Glycerophospholipids (GP)	Glycerophosphoglycerols	Phosphatidylglycerols (PG)	rs28736894	chr4:115435340	C / T	-0.1052	0.0166	2.114e-10	UGT8	UGT8
779.508	PG(32:1)_[M+OAc]1-	Glycerophospholipids (GP)	Glycerophosphoglycerols	Phosphatidylglycerols (PG)	rs17622270	chr4:115435361	A / G	-0.1052	0.0166	2.114e-10	UGT8	UGT8
779.508	PG(32:1)_[M+OAc]1-	Glycerophospholipids (GP)	Glycerophosphoglycerols	Phosphatidylglycerols (PG)	rs958771	chr4:115435662	T / G	-0.1052	0.0166	2.114e-10	UGT8	UGT8
779.508	PG(32:1)_[M+OAc]1-	Glycerophospholipids (GP)	Glycerophosphoglycerols	Phosphatidylglycerols (PG)	rs10021252	chr4:115436346	T / C	-0.1048	0.0166	3.05e-10	UGT8	UGT8
779.508	PG(32:1)_[M+OAc]1-	Glycerophospholipids (GP)	Glycerophosphoglycerols	Phosphatidylglycerols (PG)	rs66806558	chr4:115436655	C / T	0.1278	0.0173	1.596e-13	UGT8	UGT8
779.508	PG(32:1)_[M+OAc]1-	Glycerophospholipids (GP)	Glycerophosphoglycerols	Phosphatidylglycerols (PG)	rs75946304	chr4:115437617	A / G	0.1214	0.0172	1.819e-12	UGT8	UGT8
779.508	PG(32:1)_[M+OAc]1-	Glycerophospholipids (GP)	Glycerophosphoglycerols	Phosphatidylglycerols (PG)	rs66482879	chr4:115438678	G / A	-0.1053	0.0166	2.033e-10	UGT8	UGT8
779.508	PG(32:1)_[M+OAc]1-	Glycerophospholipids (GP)	Glycerophosphoglycerols	Phosphatidylglycerols (PG)	rs28657376	chr4:115438806	A / G	-0.1065	0.0166	1.491e-10	UGT8	UGT8
779.508	PG(32:1)_[M+OAc]1-	Glycerophospholipids (GP)	Glycerophosphoglycerols	Phosphatidylglycerols (PG)	rs10857029	chr4:115439266	A / G	-0.105	0.0166	2.649e-10	UGT8	UGT8
779.508	PG(32:1)_[M+OAc]1-	Glycerophospholipids (GP)	Glycerophosphoglycerols	Phosphatidylglycerols (PG)	rs35913849	chr4:115440174	T / C	-0.1053	0.0166	2.033e-10	UGT8	UGT8
779.508	PG(32:1)_[M+OAc]1-	Glycerophospholipids (GP)	Glycerophosphoglycerols	Phosphatidylglycerols (PG)	rs13149823	chr4:115440213	A / G	0.1275	0.0173	1.8e-13	UGT8	UGT8
779.508	PG(32:1)_[M+OAc]1-	Glycerophospholipids (GP)	Glycerophosphoglycerols	Phosphatidylglycerols (PG)	rs34740514	chr4:115440367	C / G	-0.1057	0.0166	1.735e-10	UGT8	UGT8
779.508	PG(32:1)_[M+OAc]1-	Glycerophospholipids (GP)	Glycerophosphoglycerols	Phosphatidylglycerols (PG)	rs7684322	chr4:115440944	C / G	-0.1053	0.0166	2.033e-10	UGT8	UGT8
779.508	PG(32:1)_[M+OAc]1-	Glycerophospholipids (GP)	Glycerophosphoglycerols	Phosphatidylglycerols (PG)	rs116635794	chr4:115442021	C / T	-0.1046	0.0168	4.437e-10	UGT8	UGT8
779.508	PG(32:1)_[M+OAc]1-	Glycerophospholipids (GP)	Glycerophosphoglycerols	Phosphatidylglycerols (PG)	rs115226790	chr4:115442050	G / A	-0.1056	0.0167	2.544e-10	UGT8	UGT8
779.508	PG(32:1)_[M+OAc]1-	Glycerophospholipids (GP)	Glycerophosphoglycerols	Phosphatidylglycerols (PG)	rs116424027	chr4:115442059	T / C	-0.1057	0.0166	1.896e-10	UGT8	UGT8
779.508	PG(32:1)_[M+OAc]1-	Glycerophospholipids (GP)	Glycerophosphoglycerols	Phosphatidylglycerols (PG)	rs12108520	chr4:115443243	C / A	-0.1053	0.0166	2.033e-10	UGT8	UGT8
779.508	PG(32:1)_[M+OAc]1-	Glycerophospholipids (GP)	Glycerophosphoglycerols	Phosphatidylglycerols (PG)	rs12108281	chr4:115443303	T / C	-0.104	0.0166	3.36e-10	UGT8	UGT8
779.508	PG(32:1)_[M+OAc]1-	Glycerophospholipids (GP)	Glycerophosphoglycerols	Phosphatidylglycerols (PG)	rs62309917	chr4:115443588	T / G	0.1279	0.0173	1.54e-13	UGT8	UGT8
779.508	PG(32:1)_[M+OAc]1-	Glycerophospholipids (GP)	Glycerophosphoglycerols	Phosphatidylglycerols (PG)	rs7682188	chr4:115444070	G / T	-0.1279	0.0173	1.549e-13	UGT8	UGT8
779.508	PG(32:1)_[M+OAc]1-	Glycerophospholipids (GP)	Glycerophosphoglycerols	Phosphatidylglycerols (PG)	rs142556289	chr4:115444625	G / A	-0.1052	0.0166	2.065e-10	UGT8	UGT8
779.508	PG(32:1)_[M+OAc]1-	Glycerophospholipids (GP)	Glycerophosphoglycerols	Phosphatidylglycerols (PG)	rs7658756	chr4:115444722	A / C	0.128	0.0173	1.5e-13	UGT8	UGT8
779.508	PG(32:1)_[M+OAc]1-	Glycerophospholipids (GP)	Glycerophosphoglycerols	Phosphatidylglycerols (PG)	rs142668162	chr4:115445973	T / C	-0.1072	0.0167	1.516e-10	UGT8	UGT8
779.508	PG(32:1)_[M+OAc]1-	Glycerophospholipids (GP)	Glycerophosphoglycerols	Phosphatidylglycerols (PG)	rs57623571	chr4:115446766	A / G	0.1287	0.0176	2.658e-13	UGT8	UGT8
779.508	PG(32:1)_[M+OAc]1-	Glycerophospholipids (GP)	Glycerophosphoglycerols	Phosphatidylglycerols (PG)	rs11931321	chr4:115447178	A / G	-0.1051	0.0166	2.181e-10	UGT8	UGT8
779.508	PG(32:1)_[M+OAc]1-	Glycerophospholipids (GP)	Glycerophosphoglycerols	Phosphatidylglycerols (PG)	rs13117126	chr4:115447914	T / C	-0.1052	0.0166	2.065e-10	UGT8	UGT8
779.508	PG(32:1)_[M+OAc]1-	Glycerophospholipids (GP)	Glycerophosphoglycerols	Phosphatidylglycerols (PG)	chr4:115448517:I	chr4:115448517	GA / G	-0.1054	0.0166	2.023e-10	UGT8	UGT8
779.508	PG(32:1)_[M+OAc]1-	Glycerophospholipids (GP)	Glycerophosphoglycerols	Phosphatidylglycerols (PG)	rs10857031	chr4:115448846	A / T	-0.1055	0.0166	1.975e-10	UGT8	UGT8
779.508	PG(32:1)_[M+OAc]1-	Glycerophospholipids (GP)	Glycerophosphoglycerols	Phosphatidylglycerols (PG)	rs10857032	chr4:115448987	T / C	-0.1057	0.0166	1.781e-10	UGT8	UGT8
779.508	PG(32:1)_[M+OAc]1-	Glycerophospholipids (GP)	Glycerophosphoglycerols	Phosphatidylglycerols (PG)	rs12505597	chr4:115449110	C / T	-0.1046	0.0166	2.789e-10	UGT8	UGT8
779.508	PG(32:1)_[M+OAc]1-	Glycerophospholipids (GP)	Glycerophosphoglycerols	Phosphatidylglycerols (PG)	rs11098253	chr4:115449146	A / G	-0.1059	0.0166	1.656e-10	UGT8	UGT8
779.508	PG(32:1)_[M+OAc]1-	Glycerophospholipids (GP)	Glycerophosphoglycerols	Phosphatidylglycerols (PG)	rs7655989	chr4:115449290	T / C	-0.1061	0.0166	1.577e-10	UGT8	UGT8
779.508	PG(32:1)_[M+OAc]1-	Glycerophospholipids (GP)	Glycerophosphoglycerols	Phosphatidylglycerols (PG)	rs6814022	chr4:115449823	A / G	-0.1061	0.0166	1.523e-10	UGT8	UGT8
779.508	PG(32:1)_[M+OAc]1-	Glycerophospholipids (GP)	Glycerophosphoglycerols	Phosphatidylglycerols (PG)	rs1460779	chr4:115450050	G / C	-0.105	0.0166	2.263e-10	UGT8	UGT8
779.508	PG(32:1)_[M+OAc]1-	Glycerophospholipids (GP)	Glycerophosphoglycerols	Phosphatidylglycerols (PG)	rs1841435	chr4:115450464	T / G	0.1062	0.0166	1.403e-10	UGT8	UGT8
779.508	PG(32:1)_[M+OAc]1-	Glycerophospholipids (GP)	Glycerophosphoglycerols	Phosphatidylglycerols (PG)	rs1841434	chr4:115450576	G / A	0.1063	0.0166	1.37e-10	UGT8	UGT8
779.508	PG(32:1)_[M+OAc]1-	Glycerophospholipids (GP)	Glycerophosphoglycerols	Phosphatidylglycerols (PG)	rs1824490	chr4:115450922	T / C	0.1063	0.0166	1.37e-10	UGT8	UGT8
779.508	PG(32:1)_[M+OAc]1-	Glycerophospholipids (GP)	Glycerophosphoglycerols	Phosphatidylglycerols (PG)	rs1824489	chr4:115450932	C / G	0.1063	0.0166	1.37e-10	UGT8	UGT8
779.508	PG(32:1)_[M+OAc]1-	Glycerophospholipids (GP)	Glycerophosphoglycerols	Phosphatidylglycerols (PG)	rs7669767	chr4:115451420	A / G	0.1062	0.0166	1.392e-10	UGT8	UGT8
779.508	PG(32:1)_[M+OAc]1-	Glycerophospholipids (GP)	Glycerophosphoglycerols	Phosphatidylglycerols (PG)	rs2100782	chr4:115451608	G / A	0.1063	0.0166	1.359e-10	UGT8	UGT8
779.508	PG(32:1)_[M+OAc]1-	Glycerophospholipids (GP)	Glycerophosphoglycerols	Phosphatidylglycerols (PG)	rs12508960	chr4:115452217	C / T	0.1062	0.0166	1.392e-10	UGT8	UGT8
779.508	PG(32:1)_[M+OAc]1-	Glycerophospholipids (GP)	Glycerophosphoglycerols	Phosphatidylglycerols (PG)	rs11098254	chr4:115452456	A / G	0.1062	0.0166	1.392e-10	UGT8	UGT8
779.508	PG(32:1)_[M+OAc]1-	Glycerophospholipids (GP)	Glycerophosphoglycerols	Phosphatidylglycerols (PG)	rs11098255	chr4:115452549	A / G	0.1062	0.0166	1.426e-10	UGT8	UGT8
779.508	PG(32:1)_[M+OAc]1-	Glycerophospholipids (GP)	Glycerophosphoglycerols	Phosphatidylglycerols (PG)	rs6834235	chr4:115452738	A / G	-0.1062	0.0166	1.395e-10	UGT8	UGT8
779.508	PG(32:1)_[M+OAc]1-	Glycerophospholipids (GP)	Glycerophosphoglycerols	Phosphatidylglycerols (PG)	rs1599320	chr4:115453383	C / T	-0.1062	0.0166	1.395e-10	UGT8	UGT8
779.508	PG(32:1)_[M+OAc]1-	Glycerophospholipids (GP)	Glycerophosphoglycerols	Phosphatidylglycerols (PG)	rs7683270	chr4:115453594	A / G	0.1062	0.0166	1.392e-10	UGT8	UGT8
779.508	PG(32:1)_[M+OAc]1-	Glycerophospholipids (GP)	Glycerophosphoglycerols	Phosphatidylglycerols (PG)	rs13103303	chr4:115453633	T / C	0.1288	0.0173	9.715e-14	UGT8	UGT8
779.508	PG(32:1)_[M+OAc]1-	Glycerophospholipids (GP)	Glycerophosphoglycerols	Phosphatidylglycerols (PG)	rs13103327	chr4:115453707	G / A	0.1289	0.0173	9.921e-14	UGT8	UGT8
779.508	PG(32:1)_[M+OAc]1-	Glycerophospholipids (GP)	Glycerophosphoglycerols	Phosphatidylglycerols (PG)	rs13103719	chr4:115453776	A / C	0.1066	0.0166	1.205e-10	UGT8	UGT8
779.508	PG(32:1)_[M+OAc]1-	Glycerophospholipids (GP)	Glycerophosphoglycerols	Phosphatidylglycerols (PG)	rs13104081	chr4:115453797	A / G	0.1063	0.0166	1.359e-10	UGT8	UGT8
779.508	PG(32:1)_[M+OAc]1-	Glycerophospholipids (GP)	Glycerophosphoglycerols	Phosphatidylglycerols (PG)	rs13109008	chr4:115453925	G / A	0.1057	0.0166	2.004e-10	UGT8	UGT8
779.508	PG(32:1)_[M+OAc]1-	Glycerophospholipids (GP)	Glycerophosphoglycerols	Phosphatidylglycerols (PG)	rs13109803	chr4:115453993	A / G	0.1057	0.0166	1.825e-10	UGT8	UGT8
779.508	PG(32:1)_[M+OAc]1-	Glycerophospholipids (GP)	Glycerophosphoglycerols	Phosphatidylglycerols (PG)	rs7440658	chr4:115454459	T / G	0.1069	0.0166	1.279e-10	UGT8	UGT8
779.508	PG(32:1)_[M+OAc]1-	Glycerophospholipids (GP)	Glycerophosphoglycerols	Phosphatidylglycerols (PG)	rs2126028	chr4:115454609	A / G	-0.1058	0.0166	1.61e-10	UGT8	UGT8
779.508	PG(32:1)_[M+OAc]1-	Glycerophospholipids (GP)	Glycerophosphoglycerols	Phosphatidylglycerols (PG)	rs2126027	chr4:115454666	G / T	-0.1283	0.0173	1.207e-13	UGT8	UGT8
779.508	PG(32:1)_[M+OAc]1-	Glycerophospholipids (GP)	Glycerophosphoglycerols	Phosphatidylglycerols (PG)	rs2126026	chr4:115454687	G / C	-0.1278	0.0173	1.491e-13	UGT8	UGT8
779.508	PG(32:1)_[M+OAc]1-	Glycerophospholipids (GP)	Glycerophosphoglycerols	Phosphatidylglycerols (PG)	chr4:115454950:I	chr4:115454950	TGGA / T	-0.1279	0.0175	2.589e-13	UGT8	UGT8
779.508	PG(32:1)_[M+OAc]1-	Glycerophospholipids (GP)	Glycerophosphoglycerols	Phosphatidylglycerols (PG)	rs12503437	chr4:115456111	T / C	-0.1127	0.0167	1.596e-11	UGT8	UGT8
779.508	PG(32:1)_[M+OAc]1-	Glycerophospholipids (GP)	Glycerophosphoglycerols	Phosphatidylglycerols (PG)	rs12503513	chr4:115456152	A / G	0.1292	0.0174	1.11e-13	UGT8	UGT8
779.508	PG(32:1)_[M+OAc]1-	Glycerophospholipids (GP)	Glycerophosphoglycerols	Phosphatidylglycerols (PG)	rs12503481	chr4:115456236	G / C	-0.1128	0.0167	1.542e-11	UGT8	UGT8
779.508	PG(32:1)_[M+OAc]1-	Glycerophospholipids (GP)	Glycerophosphoglycerols	Phosphatidylglycerols (PG)	rs7667556	chr4:115456515	T / A	0.1294	0.0173	8.061e-14	UGT8	UGT8
779.508	PG(32:1)_[M+OAc]1-	Glycerophospholipids (GP)	Glycerophosphoglycerols	Phosphatidylglycerols (PG)	rs7668023	chr4:115456522	A / G	-0.1127	0.0167	1.567e-11	UGT8	UGT8
779.508	PG(32:1)_[M+OAc]1-	Glycerophospholipids (GP)	Glycerophosphoglycerols	Phosphatidylglycerols (PG)	rs17047190	chr4:115457855	C / G	0.1195	0.0173	5.61e-12	UGT8	UGT8
779.508	PG(32:1)_[M+OAc]1-	Glycerophospholipids (GP)	Glycerophosphoglycerols	Phosphatidylglycerols (PG)	chr4:115457985:D	chr4:115457985	A / AT	0.1785	0.0259	5.808e-12	UGT8	UGT8
779.508	PG(32:1)_[M+OAc]1-	Glycerophospholipids (GP)	Glycerophosphoglycerols	Phosphatidylglycerols (PG)	rs11938628	chr4:115458168	T / C	0.176	0.0259	1e-11	UGT8	UGT8
779.508	PG(32:1)_[M+OAc]1-	Glycerophospholipids (GP)	Glycerophosphoglycerols	Phosphatidylglycerols (PG)	rs34534063	chr4:115459233	A / G	0.1833	0.0258	1.113e-12	UGT8	UGT8
779.508	PG(32:1)_[M+OAc]1-	Glycerophospholipids (GP)	Glycerophosphoglycerols	Phosphatidylglycerols (PG)	rs36078253	chr4:115459268	T / C	0.1849	0.0258	7.672e-13	UGT8	UGT8
779.508	PG(32:1)_[M+OAc]1-	Glycerophospholipids (GP)	Glycerophosphoglycerols	Phosphatidylglycerols (PG)	rs60461745	chr4:115459464	A / G	0.1606	0.0249	1.097e-10	UGT8	UGT8
779.508	PG(32:1)_[M+OAc]1-	Glycerophospholipids (GP)	Glycerophosphoglycerols	Phosphatidylglycerols (PG)	rs13114989	chr4:115460025	A / G	0.1896	0.0262	4.876e-13	UGT8	UGT8
779.508	PG(32:1)_[M+OAc]1-	Glycerophospholipids (GP)	Glycerophosphoglycerols	Phosphatidylglycerols (PG)	rs79261962	chr4:115461109	C / G	0.1933	0.0262	1.708e-13	UGT8	UGT8
779.508	PG(32:1)_[M+OAc]1-	Glycerophospholipids (GP)	Glycerophosphoglycerols	Phosphatidylglycerols (PG)	rs1460782	chr4:115461158	G / T	-0.1031	0.0166	4.765e-10	UGT8	UGT8
779.508	PG(32:1)_[M+OAc]1-	Glycerophospholipids (GP)	Glycerophosphoglycerols	Phosphatidylglycerols (PG)	rs1460783	chr4:115461265	C / T	-0.1028	0.0166	5.352e-10	UGT8	UGT8
779.508	PG(32:1)_[M+OAc]1-	Glycerophospholipids (GP)	Glycerophosphoglycerols	Phosphatidylglycerols (PG)	rs77422558	chr4:115462100	A / C	0.193	0.0262	1.614e-13	UGT8	UGT8
779.508	PG(32:1)_[M+OAc]1-	Glycerophospholipids (GP)	Glycerophosphoglycerols	Phosphatidylglycerols (PG)	rs12649041	chr4:115462376	A / C	0.193	0.0262	1.623e-13	UGT8	UGT8
779.508	PG(32:1)_[M+OAc]1-	Glycerophospholipids (GP)	Glycerophosphoglycerols	Phosphatidylglycerols (PG)	rs13136602	chr4:115463020	T / C	0.1913	0.0262	2.586e-13	UGT8	UGT8
779.508	PG(32:1)_[M+OAc]1-	Glycerophospholipids (GP)	Glycerophosphoglycerols	Phosphatidylglycerols (PG)	rs1460784	chr4:115463103	G / A	0.1303	0.0173	5.812e-14	UGT8	UGT8
779.508	PG(32:1)_[M+OAc]1-	Glycerophospholipids (GP)	Glycerophosphoglycerols	Phosphatidylglycerols (PG)	rs12649943	chr4:115463616	T / G	0.1911	0.0262	2.8e-13	UGT8	UGT8
779.508	PG(32:1)_[M+OAc]1-	Glycerophospholipids (GP)	Glycerophosphoglycerols	Phosphatidylglycerols (PG)	rs12649963	chr4:115463693	T / G	0.1929	0.0262	1.671e-13	UGT8	UGT8
779.508	PG(32:1)_[M+OAc]1-	Glycerophospholipids (GP)	Glycerophosphoglycerols	Phosphatidylglycerols (PG)	rs17047198	chr4:115465494	A / G	0.1903	0.0261	3.187e-13	UGT8	UGT8
779.508	PG(32:1)_[M+OAc]1-	Glycerophospholipids (GP)	Glycerophosphoglycerols	Phosphatidylglycerols (PG)	rs17047201	chr4:115466101	A / C	0.1891	0.0261	4.024e-13	UGT8	UGT8
779.508	PG(32:1)_[M+OAc]1-	Glycerophospholipids (GP)	Glycerophosphoglycerols	Phosphatidylglycerols (PG)	rs1460785	chr4:115466913	A / T	0.1309	0.0174	5.584e-14	UGT8	UGT8
779.508	PG(32:1)_[M+OAc]1-	Glycerophospholipids (GP)	Glycerophosphoglycerols	Phosphatidylglycerols (PG)	rs13127912	chr4:115467175	A / G	0.1865	0.026	7.538e-13	UGT8	UGT8
779.508	PG(32:1)_[M+OAc]1-	Glycerophospholipids (GP)	Glycerophosphoglycerols	Phosphatidylglycerols (PG)	rs10516604	chr4:115467268	G / C	0.1883	0.026	4.589e-13	UGT8	UGT8
779.508	PG(32:1)_[M+OAc]1-	Glycerophospholipids (GP)	Glycerophosphoglycerols	Phosphatidylglycerols (PG)	rs12648803	chr4:115467384	T / C	0.1866	0.026	6.778e-13	UGT8	UGT8
779.508	PG(32:1)_[M+OAc]1-	Glycerophospholipids (GP)	Glycerophosphoglycerols	Phosphatidylglycerols (PG)	rs10516603	chr4:115467459	G / A	0.1866	0.026	6.778e-13	UGT8	UGT8
779.508	PG(32:1)_[M+OAc]1-	Glycerophospholipids (GP)	Glycerophosphoglycerols	Phosphatidylglycerols (PG)	rs13135560	chr4:115468487	A / C	0.1883	0.026	4.589e-13	UGT8	UGT8
779.508	PG(32:1)_[M+OAc]1-	Glycerophospholipids (GP)	Glycerophosphoglycerols	Phosphatidylglycerols (PG)	rs35235288	chr4:115468776	G / A	-0.1024	0.0166	7.872e-10	UGT8	UGT8
779.508	PG(32:1)_[M+OAc]1-	Glycerophospholipids (GP)	Glycerophosphoglycerols	Phosphatidylglycerols (PG)	rs35777558	chr4:115469267	T / G	0.1884	0.026	4.511e-13	UGT8	UGT8
779.508	PG(32:1)_[M+OAc]1-	Glycerophospholipids (GP)	Glycerophosphoglycerols	Phosphatidylglycerols (PG)	rs4834419	chr4:115470026	G / A	0.1231	0.0173	1.03e-12	UGT8	UGT8
779.508	PG(32:1)_[M+OAc]1-	Glycerophospholipids (GP)	Glycerophosphoglycerols	Phosphatidylglycerols (PG)	rs1599323	chr4:115470332	C / T	0.1231	0.0173	1.03e-12	UGT8	UGT8
779.508	PG(32:1)_[M+OAc]1-	Glycerophospholipids (GP)	Glycerophosphoglycerols	Phosphatidylglycerols (PG)	rs34685786	chr4:115470436	A / C	0.1867	0.026	7.285e-13	UGT8	UGT8
779.508	PG(32:1)_[M+OAc]1-	Glycerophospholipids (GP)	Glycerophosphoglycerols	Phosphatidylglycerols (PG)	rs13104222	chr4:115470913	A / C	0.1231	0.0173	1.024e-12	UGT8	UGT8
779.508	PG(32:1)_[M+OAc]1-	Glycerophospholipids (GP)	Glycerophosphoglycerols	Phosphatidylglycerols (PG)	rs79776742	chr4:115471351	G / A	0.1885	0.026	4.358e-13	UGT8	UGT8
779.508	PG(32:1)_[M+OAc]1-	Glycerophospholipids (GP)	Glycerophosphoglycerols	Phosphatidylglycerols (PG)	rs57059575	chr4:115472393	G / C	0.1885	0.026	4.358e-13	UGT8	UGT8
779.508	PG(32:1)_[M+OAc]1-	Glycerophospholipids (GP)	Glycerophosphoglycerols	Phosphatidylglycerols (PG)	rs9995962	chr4:115472827	T / G	0.1065	0.0167	1.775e-10	UGT8	UGT8
779.508	PG(32:1)_[M+OAc]1-	Glycerophospholipids (GP)	Glycerophosphoglycerols	Phosphatidylglycerols (PG)	rs13147106	chr4:115473362	C / T	0.1885	0.026	4.332e-13	UGT8	UGT8
779.508	PG(32:1)_[M+OAc]1-	Glycerophospholipids (GP)	Glycerophosphoglycerols	Phosphatidylglycerols (PG)	rs13147485	chr4:115473477	G / T	0.1885	0.026	4.358e-13	UGT8	UGT8
779.508	PG(32:1)_[M+OAc]1-	Glycerophospholipids (GP)	Glycerophosphoglycerols	Phosphatidylglycerols (PG)	rs13120552	chr4:115473674	G / A	0.1868	0.026	6.922e-13	UGT8	UGT8
779.508	PG(32:1)_[M+OAc]1-	Glycerophospholipids (GP)	Glycerophosphoglycerols	Phosphatidylglycerols (PG)	rs13101831	chr4:115473927	C / T	0.1868	0.026	6.922e-13	UGT8	UGT8
779.508	PG(32:1)_[M+OAc]1-	Glycerophospholipids (GP)	Glycerophosphoglycerols	Phosphatidylglycerols (PG)	rs6533801	chr4:115474355	G / C	0.1231	0.0172	8.835e-13	UGT8	UGT8
779.508	PG(32:1)_[M+OAc]1-	Glycerophospholipids (GP)	Glycerophosphoglycerols	Phosphatidylglycerols (PG)	rs13127707	chr4:115474580	G / A	0.1631	0.0251	8.485e-11	UGT8	UGT8
779.508	PG(32:1)_[M+OAc]1-	Glycerophospholipids (GP)	Glycerophosphoglycerols	Phosphatidylglycerols (PG)	rs13127941	chr4:115474676	G / A	0.1869	0.026	6.805e-13	UGT8	UGT8
779.508	PG(32:1)_[M+OAc]1-	Glycerophospholipids (GP)	Glycerophosphoglycerols	Phosphatidylglycerols (PG)	rs13147198	chr4:115475091	C / G	0.1866	0.026	7.322e-13	UGT8	UGT8
779.508	PG(32:1)_[M+OAc]1-	Glycerophospholipids (GP)	Glycerophosphoglycerols	Phosphatidylglycerols (PG)	rs13123226	chr4:115475293	G / T	0.1077	0.0167	1.175e-10	UGT8	UGT8
779.508	PG(32:1)_[M+OAc]1-	Glycerophospholipids (GP)	Glycerophosphoglycerols	Phosphatidylglycerols (PG)	rs13147645	chr4:115475299	C / G	0.1883	0.026	4.804e-13	UGT8	UGT8
779.508	PG(32:1)_[M+OAc]1-	Glycerophospholipids (GP)	Glycerophosphoglycerols	Phosphatidylglycerols (PG)	rs35594431	chr4:115475653	G / T	0.1869	0.026	6.805e-13	UGT8	UGT8
779.508	PG(32:1)_[M+OAc]1-	Glycerophospholipids (GP)	Glycerophosphoglycerols	Phosphatidylglycerols (PG)	rs34403145	chr4:115475785	G / C	0.1869	0.026	6.805e-13	UGT8	UGT8
779.508	PG(32:1)_[M+OAc]1-	Glycerophospholipids (GP)	Glycerophosphoglycerols	Phosphatidylglycerols (PG)	rs12643074	chr4:115476382	C / T	0.187	0.026	6.69e-13	UGT8	UGT8
779.508	PG(32:1)_[M+OAc]1-	Glycerophospholipids (GP)	Glycerophosphoglycerols	Phosphatidylglycerols (PG)	rs2100783	chr4:115476977	C / T	0.187	0.026	6.69e-13	UGT8	UGT8
779.508	PG(32:1)_[M+OAc]1-	Glycerophospholipids (GP)	Glycerophosphoglycerols	Phosphatidylglycerols (PG)	chr4:115477257:D	chr4:115477257	G / GT	0.1312	0.0174	5.502e-14	UGT8	UGT8
779.508	PG(32:1)_[M+OAc]1-	Glycerophospholipids (GP)	Glycerophosphoglycerols	Phosphatidylglycerols (PG)	rs35252674	chr4:115477739	T / C	0.1887	0.026	4.044e-13	UGT8	UGT8
779.508	PG(32:1)_[M+OAc]1-	Glycerophospholipids (GP)	Glycerophosphoglycerols	Phosphatidylglycerols (PG)	rs28787070	chr4:115478074	T / C	-0.1035	0.0166	4.792e-10	UGT8	UGT8
779.508	PG(32:1)_[M+OAc]1-	Glycerophospholipids (GP)	Glycerophosphoglycerols	Phosphatidylglycerols (PG)	rs12641516	chr4:115478128	A / G	0.1887	0.026	4.044e-13	UGT8	UGT8
779.508	PG(32:1)_[M+OAc]1-	Glycerophospholipids (GP)	Glycerophosphoglycerols	Phosphatidylglycerols (PG)	rs28870381	chr4:115478499	T / G	0.1316	0.0174	4.603e-14	UGT8	UGT8
779.508	PG(32:1)_[M+OAc]1-	Glycerophospholipids (GP)	Glycerophosphoglycerols	Phosphatidylglycerols (PG)	rs71606719	chr4:115478970	A / T	0.1887	0.026	4.044e-13	UGT8	UGT8
779.508	PG(32:1)_[M+OAc]1-	Glycerophospholipids (GP)	Glycerophosphoglycerols	Phosphatidylglycerols (PG)	rs13125495	chr4:115479482	A / C	0.1891	0.026	3.275e-13	UGT8	UGT8
779.508	PG(32:1)_[M+OAc]1-	Glycerophospholipids (GP)	Glycerophosphoglycerols	Phosphatidylglycerols (PG)	chr4:115481134:D	chr4:115481134	T / TACAC	0.1936	0.0281	5.185e-12	UGT8	UGT8
779.508	PG(32:1)_[M+OAc]1-	Glycerophospholipids (GP)	Glycerophosphoglycerols	Phosphatidylglycerols (PG)	rs12650115	chr4:115481388	G / A	0.187	0.026	6.995e-13	UGT8	UGT8
779.508	PG(32:1)_[M+OAc]1-	Glycerophospholipids (GP)	Glycerophosphoglycerols	Phosphatidylglycerols (PG)	rs12644238	chr4:115481754	T / G	0.1869	0.026	6.826e-13	UGT8	UGT8
779.508	PG(32:1)_[M+OAc]1-	Glycerophospholipids (GP)	Glycerophosphoglycerols	Phosphatidylglycerols (PG)	rs10021731	chr4:115481915	C / T	0.1231	0.0174	1.468e-12	UGT8	UGT8
779.508	PG(32:1)_[M+OAc]1-	Glycerophospholipids (GP)	Glycerophosphoglycerols	Phosphatidylglycerols (PG)	chr4:115482128:D	chr4:115482128	T / TCTTTTA	0.1907	0.0264	4.838e-13	UGT8	UGT8
779.508	PG(32:1)_[M+OAc]1-	Glycerophospholipids (GP)	Glycerophosphoglycerols	Phosphatidylglycerols (PG)	rs1903365	chr4:115483053	A / T	0.187	0.026	6.711e-13	UGT8	UGT8
779.508	PG(32:1)_[M+OAc]1-	Glycerophospholipids (GP)	Glycerophosphoglycerols	Phosphatidylglycerols (PG)	rs13110751	chr4:115484728	G / C	0.187	0.026	6.597e-13	UGT8	UGT8
779.508	PG(32:1)_[M+OAc]1-	Glycerophospholipids (GP)	Glycerophosphoglycerols	Phosphatidylglycerols (PG)	rs13105144	chr4:115485029	A / T	0.187	0.026	6.597e-13	UGT8	UGT8
779.508	PG(32:1)_[M+OAc]1-	Glycerophospholipids (GP)	Glycerophosphoglycerols	Phosphatidylglycerols (PG)	rs13129837	chr4:115485081	T / C	0.1888	0.026	4.223e-13	UGT8	UGT8
779.508	PG(32:1)_[M+OAc]1-	Glycerophospholipids (GP)	Glycerophosphoglycerols	Phosphatidylglycerols (PG)	rs11098258	chr4:115485684	G / A	0.1257	0.0172	2.885e-13	UGT8	UGT8
779.508	PG(32:1)_[M+OAc]1-	Glycerophospholipids (GP)	Glycerophosphoglycerols	Phosphatidylglycerols (PG)	rs17047236	chr4:115485731	G / C	0.1871	0.026	6.485e-13	UGT8	UGT8
779.508	PG(32:1)_[M+OAc]1-	Glycerophospholipids (GP)	Glycerophosphoglycerols	Phosphatidylglycerols (PG)	rs33914856	chr4:115485824	A / G	0.1871	0.026	6.485e-13	UGT8	UGT8
779.508	PG(32:1)_[M+OAc]1-	Glycerophospholipids (GP)	Glycerophosphoglycerols	Phosphatidylglycerols (PG)	rs1380932	chr4:115487079	A / G	0.1889	0.026	4.035e-13	UGT8	UGT8
779.508	PG(32:1)_[M+OAc]1-	Glycerophospholipids (GP)	Glycerophosphoglycerols	Phosphatidylglycerols (PG)	rs35733223	chr4:115487610	C / T	0.1067	0.0167	1.665e-10	UGT8	UGT8
779.508	PG(32:1)_[M+OAc]1-	Glycerophospholipids (GP)	Glycerophosphoglycerols	Phosphatidylglycerols (PG)	rs35082726	chr4:115487933	G / A	0.1889	0.026	4.035e-13	UGT8	UGT8
779.508	PG(32:1)_[M+OAc]1-	Glycerophospholipids (GP)	Glycerophosphoglycerols	Phosphatidylglycerols (PG)	rs17047238	chr4:115490026	C / G	0.189	0.026	3.922e-13	UGT8	UGT8
779.508	PG(32:1)_[M+OAc]1-	Glycerophospholipids (GP)	Glycerophosphoglycerols	Phosphatidylglycerols (PG)	rs1460786	chr4:115490043	G / A	0.189	0.026	3.922e-13	UGT8	UGT8
779.508	PG(32:1)_[M+OAc]1-	Glycerophospholipids (GP)	Glycerophosphoglycerols	Phosphatidylglycerols (PG)	rs71606720	chr4:115490457	A / G	0.1901	0.0262	3.681e-13	UGT8	UGT8
779.508	PG(32:1)_[M+OAc]1-	Glycerophospholipids (GP)	Glycerophosphoglycerols	Phosphatidylglycerols (PG)	rs7672145	chr4:115490597	C / T	0.104	0.0167	5.02e-10	UGT8	UGT8
779.508	PG(32:1)_[M+OAc]1-	Glycerophospholipids (GP)	Glycerophosphoglycerols	Phosphatidylglycerols (PG)	chr4:115490682:I	chr4:115490682	TCA / T	0.1873	0.026	5.794e-13	UGT8	UGT8
779.508	PG(32:1)_[M+OAc]1-	Glycerophospholipids (GP)	Glycerophosphoglycerols	Phosphatidylglycerols (PG)	chr4:115490686:I	chr4:115490686	AC / A	0.1907	0.026	2.092e-13	UGT8	UGT8
779.508	PG(32:1)_[M+OAc]1-	Glycerophospholipids (GP)	Glycerophosphoglycerols	Phosphatidylglycerols (PG)	chr4:115490688:I	chr4:115490688	AC / A	0.184	0.027	8.794e-12	UGT8	UGT8
779.508	PG(32:1)_[M+OAc]1-	Glycerophospholipids (GP)	Glycerophosphoglycerols	Phosphatidylglycerols (PG)	rs17047239	chr4:115491715	C / T	0.1868	0.026	7.42e-13	UGT8	UGT8
779.508	PG(32:1)_[M+OAc]1-	Glycerophospholipids (GP)	Glycerophosphoglycerols	Phosphatidylglycerols (PG)	rs17047244	chr4:115492688	G / A	0.1868	0.026	7.339e-13	UGT8	UGT8
779.508	PG(32:1)_[M+OAc]1-	Glycerophospholipids (GP)	Glycerophosphoglycerols	Phosphatidylglycerols (PG)	rs17622401	chr4:115492707	G / A	0.1302	0.0175	9.12e-14	UGT8	UGT8
779.508	PG(32:1)_[M+OAc]1-	Glycerophospholipids (GP)	Glycerophosphoglycerols	Phosphatidylglycerols (PG)	rs17047246	chr4:115493032	G / A	0.1868	0.026	7.339e-13	UGT8	UGT8
779.508	PG(32:1)_[M+OAc]1-	Glycerophospholipids (GP)	Glycerophosphoglycerols	Phosphatidylglycerols (PG)	chr4:115493284:I	chr4:115493284	CTAT / C	0.1293	0.0176	2.313e-13	UGT8	UGT8
779.508	PG(32:1)_[M+OAc]1-	Glycerophospholipids (GP)	Glycerophosphoglycerols	Phosphatidylglycerols (PG)	rs4834421	chr4:115493842	C / A	0.13	0.0175	9.796e-14	UGT8	UGT8
779.508	PG(32:1)_[M+OAc]1-	Glycerophospholipids (GP)	Glycerophosphoglycerols	Phosphatidylglycerols (PG)	rs13144260	chr4:115494427	G / C	0.1868	0.0262	1.075e-12	UGT8	UGT8
779.508	PG(32:1)_[M+OAc]1-	Glycerophospholipids (GP)	Glycerophosphoglycerols	Phosphatidylglycerols (PG)	rs12507591	chr4:115495495	T / G	0.1059	0.0168	2.727e-10	UGT8	UGT8
779.508	PG(32:1)_[M+OAc]1-	Glycerophospholipids (GP)	Glycerophosphoglycerols	Phosphatidylglycerols (PG)	chr4:115495754:D	chr4:115495754	A / AC	0.187	0.0261	7.373e-13	UGT8	UGT8
779.508	PG(32:1)_[M+OAc]1-	Glycerophospholipids (GP)	Glycerophosphoglycerols	Phosphatidylglycerols (PG)	rs34948407	chr4:115496436	G / A	0.187	0.0261	7.292e-13	UGT8	UGT8
779.508	PG(32:1)_[M+OAc]1-	Glycerophospholipids (GP)	Glycerophosphoglycerols	Phosphatidylglycerols (PG)	rs28734840	chr4:115497090	T / C	0.1296	0.0175	1.253e-13	UGT8	UGT8
779.508	PG(32:1)_[M+OAc]1-	Glycerophospholipids (GP)	Glycerophosphoglycerols	Phosphatidylglycerols (PG)	rs12648883	chr4:115497660	A / G	0.1303	0.0175	9.47e-14	UGT8	UGT8
779.508	PG(32:1)_[M+OAc]1-	Glycerophospholipids (GP)	Glycerophosphoglycerols	Phosphatidylglycerols (PG)	rs56149980	chr4:115497736	T / C	0.1871	0.0261	7.213e-13	UGT8	UGT8
779.508	PG(32:1)_[M+OAc]1-	Glycerophospholipids (GP)	Glycerophosphoglycerols	Phosphatidylglycerols (PG)	rs12331895	chr4:115498668	A / G	0.1045	0.0168	4.541e-10	UGT8	UGT8
779.508	PG(32:1)_[M+OAc]1-	Glycerophospholipids (GP)	Glycerophosphoglycerols	Phosphatidylglycerols (PG)	rs12650568	chr4:115499617	A / G	0.1297	0.0175	1.326e-13	UGT8	UGT8
779.508	PG(32:1)_[M+OAc]1-	Glycerophospholipids (GP)	Glycerophosphoglycerols	Phosphatidylglycerols (PG)	rs12650546	chr4:115499674	T / C	0.1054	0.0168	3.328e-10	UGT8	UGT8
779.508	PG(32:1)_[M+OAc]1-	Glycerophospholipids (GP)	Glycerophosphoglycerols	Phosphatidylglycerols (PG)	rs12645269	chr4:115500559	G / A	0.1872	0.0261	7.326e-13	UGT8	UGT8
779.508	PG(32:1)_[M+OAc]1-	Glycerophospholipids (GP)	Glycerophosphoglycerols	Phosphatidylglycerols (PG)	rs12642541	chr4:115500732	G / T	0.1872	0.0261	7.247e-13	UGT8	UGT8
779.508	PG(32:1)_[M+OAc]1-	Glycerophospholipids (GP)	Glycerophosphoglycerols	Phosphatidylglycerols (PG)	rs57930571	chr4:115501589	C / G	0.1874	0.0261	7.281e-13	UGT8	UGT8
779.508	PG(32:1)_[M+OAc]1-	Glycerophospholipids (GP)	Glycerophosphoglycerols	Phosphatidylglycerols (PG)	rs9884212	chr4:115502044	T / C	0.1043	0.0169	6.334e-10	UGT8	UGT8
779.508	PG(32:1)_[M+OAc]1-	Glycerophospholipids (GP)	Glycerophosphoglycerols	Phosphatidylglycerols (PG)	rs35732213	chr4:115502583	C / T	0.1862	0.0261	1.053e-12	UGT8	UGT8
779.508	PG(32:1)_[M+OAc]1-	Glycerophospholipids (GP)	Glycerophosphoglycerols	Phosphatidylglycerols (PG)	rs35936834	chr4:115502676	C / T	0.1875	0.0261	7.315e-13	UGT8	UGT8
779.508	PG(32:1)_[M+OAc]1-	Glycerophospholipids (GP)	Glycerophosphoglycerols	Phosphatidylglycerols (PG)	rs6813229	chr4:115503877	C / A	0.1876	0.0262	7.43e-13	UGT8	UGT8
779.508	PG(32:1)_[M+OAc]1-	Glycerophospholipids (GP)	Glycerophosphoglycerols	Phosphatidylglycerols (PG)	rs6813283	chr4:115503962	C / A	0.1875	0.026	6.089e-13	UGT8	UGT8
779.508	PG(32:1)_[M+OAc]1-	Glycerophospholipids (GP)	Glycerophosphoglycerols	Phosphatidylglycerols (PG)	rs6839189	chr4:115504004	C / T	0.1875	0.0262	7.738e-13	UGT8	UGT8
779.508	PG(32:1)_[M+OAc]1-	Glycerophospholipids (GP)	Glycerophosphoglycerols	Phosphatidylglycerols (PG)	rs34581144	chr4:115504727	G / A	0.129	0.0177	2.776e-13	UGT8	UGT8
779.508	PG(32:1)_[M+OAc]1-	Glycerophospholipids (GP)	Glycerophosphoglycerols	Phosphatidylglycerols (PG)	rs35789595	chr4:115515211	A / C	0.1854	0.0263	1.684e-12	UGT8	UGT8
779.508	PG(32:1)_[M+OAc]1-	Glycerophospholipids (GP)	Glycerophosphoglycerols	Phosphatidylglycerols (PG)	rs35578985	chr4:115515656	T / C	0.1854	0.0263	1.663e-12	UGT8	UGT8
779.508	PG(32:1)_[M+OAc]1-	Glycerophospholipids (GP)	Glycerophosphoglycerols	Phosphatidylglycerols (PG)	rs34001486	chr4:115515948	G / A	0.1854	0.0263	1.835e-12	UGT8	UGT8
779.508	PG(32:1)_[M+OAc]1-	Glycerophospholipids (GP)	Glycerophosphoglycerols	Phosphatidylglycerols (PG)	rs7437576	chr4:115516623	A / G	0.184	0.0264	3.066e-12	UGT8	UGT8
779.508	PG(32:1)_[M+OAc]1-	Glycerophospholipids (GP)	Glycerophosphoglycerols	Phosphatidylglycerols (PG)	rs7434753	chr4:115517543	C / T	0.1846	0.0264	2.496e-12	UGT8	UGT8
779.508	PG(32:1)_[M+OAc]1-	Glycerophospholipids (GP)	Glycerophosphoglycerols	Phosphatidylglycerols (PG)	rs6849357	chr4:115519271	A / G	-0.1709	0.0263	8.573e-11	UGT8	UGT8
779.508	PG(32:1)_[M+OAc]1-	Glycerophospholipids (GP)	Glycerophosphoglycerols	Phosphatidylglycerols (PG)	rs13112553	chr4:115519350	A / C	-0.1709	0.0263	8.573e-11	UGT8	UGT8
779.508	PG(32:1)_[M+OAc]1-	Glycerophospholipids (GP)	Glycerophosphoglycerols	Phosphatidylglycerols (PG)	rs12511581	chr4:115519556	G / T	-0.1699	0.0263	1.103e-10	UGT8	UGT8
779.508	PG(32:1)_[M+OAc]1-	Glycerophospholipids (GP)	Glycerophosphoglycerols	Phosphatidylglycerols (PG)	rs11098260	chr4:115519826	G / A	-0.1678	0.0262	1.49e-10	UGT8	UGT8
779.508	PG(32:1)_[M+OAc]1-	Glycerophospholipids (GP)	Glycerophosphoglycerols	Phosphatidylglycerols (PG)	rs12499938	chr4:115519840	G / A	-0.1668	0.0266	3.555e-10	UGT8	UGT8
909.55	PI(40:6)_[M-H]1-	Glycerophospholipids (GP)	Glycerophosphoinositols	Phosphatidylinositols (PI)	rs1225737	chr6:10982652	T / C	-0.0467	0.0076	7.223e-10	ELOVL2	ELOVL2-LOC100506409
909.55	PI(40:6)_[M-H]1-	Glycerophospholipids (GP)	Glycerophosphoinositols	Phosphatidylinositols (PI)	rs4532436	chr6:10983971	G / C	-0.0466	0.0076	7.639e-10	ELOVL2	ELOVL2-LOC100506409
909.55	PI(40:6)_[M-H]1-	Glycerophospholipids (GP)	Glycerophosphoinositols	Phosphatidylinositols (PI)	rs9379992	chr6:10984330	A / G	-0.0471	0.0076	5.195e-10	ELOVL2	ELOVL2-LOC100506409
909.55	PI(40:6)_[M-H]1-	Glycerophospholipids (GP)	Glycerophosphoinositols	Phosphatidylinositols (PI)	chr6:10991667:I	chr6:10991667	CT / C	-0.0473	0.0076	4.271e-10	ELOVL2	ELOVL2-LOC100506409
909.55	PI(40:6)_[M-H]1-	Glycerophospholipids (GP)	Glycerophosphoinositols	Phosphatidylinositols (PI)	rs3798707	chr6:10991935	T / C	-0.0476	0.0076	4.666e-10	ELOVL2	ELOVL2-LOC100506409
909.55	PI(40:6)_[M-H]1-	Glycerophospholipids (GP)	Glycerophosphoinositols	Phosphatidylinositols (PI)	rs61624919	chr6:10997823	A / G	-0.0476	0.0076	4.547e-10	ELOVL2	ELOVL2-LOC100506409
909.55	PI(40:6)_[M-H]1-	Glycerophospholipids (GP)	Glycerophosphoinositols	Phosphatidylinositols (PI)	rs3798711	chr6:11002810	C / T	-0.0469	0.0076	6.05e-10	ELOVL2	ELOVL2-LOC100506409
909.55	PI(40:6)_[M-H]1-	Glycerophospholipids (GP)	Glycerophosphoinositols	Phosphatidylinositols (PI)	rs2295602	chr6:11005842	C / T	-0.0477	0.0076	3.022e-10	ELOVL2	ELOVL2-LOC100506409
909.55	PI(40:6)_[M-H]1-	Glycerophospholipids (GP)	Glycerophosphoinositols	Phosphatidylinositols (PI)	rs3798713	chr6:11008622	C / G	-0.0469	0.0074	2.436e-10	ELOVL2	ELOVL2-LOC100506409
909.55	PI(40:6)_[M-H]1-	Glycerophospholipids (GP)	Glycerophosphoinositols	Phosphatidylinositols (PI)	rs9295752	chr6:11010800	G / T	-0.0478	0.0076	2.945e-10	ELOVL2	ELOVL2-LOC100506409
909.55	PI(40:6)_[M-H]1-	Glycerophospholipids (GP)	Glycerophosphoinositols	Phosphatidylinositols (PI)	rs9380025	chr6:11011074	G / T	-0.0469	0.0076	8.36e-10	ELOVL2	ELOVL2-LOC100506409
909.55	PI(40:6)_[M-H]1-	Glycerophospholipids (GP)	Glycerophosphoinositols	Phosphatidylinositols (PI)	rs953413	chr6:11012859	A / G	-0.0478	0.0076	2.869e-10	ELOVL2	ELOVL2-LOC100506409
909.55	PI(40:6)_[M-H]1-	Glycerophospholipids (GP)	Glycerophosphoinositols	Phosphatidylinositols (PI)	rs7743830	chr6:11014220	G / A	-0.0475	0.0076	3.851e-10	ELOVL2	ELOVL2-LOC100506409
909.55	PI(40:6)_[M-H]1-	Glycerophospholipids (GP)	Glycerophosphoinositols	Phosphatidylinositols (PI)	rs1570069	chr6:11017825	G / A	-0.0478	0.0076	3.802e-10	ELOVL2	ELOVL2-LOC100506409
909.55	PI(40:6)_[M-H]1-	Glycerophospholipids (GP)	Glycerophosphoinositols	Phosphatidylinositols (PI)	rs1321536	chr6:11018812	G / T	-0.0482	0.0076	2.843e-10	ELOVL2	ELOVL2-LOC100506409
909.55	PI(40:6)_[M-H]1-	Glycerophospholipids (GP)	Glycerophosphoinositols	Phosphatidylinositols (PI)	chr6:11027942:D	chr6:11027942	C / CTAAGA	-0.0486	0.0076	1.925e-10	ELOVL2	ELOVL2-LOC100506409
909.55	PI(40:6)_[M-H]1-	Glycerophospholipids (GP)	Glycerophosphoinositols	Phosphatidylinositols (PI)	rs3798720	chr6:11040002	A / G	-0.0466	0.0076	8.107e-10	ELOVL2	ELOVL2-LOC100506409
834.601	PC(40:6)_[M+H]1+ / PE(43:6)_[M+H]1+	Glycerophospholipids (GP)	Glycerophosphocholines	Phosphatidylcholines (PC)	rs9468308	chr6:11044068	G / T	-0.0473	0.0076	4.426e-10	ELOVL2	ELOVL2-LOC100506409
909.55	PI(40:6)_[M-H]1-	Glycerophospholipids (GP)	Glycerophosphoinositols	Phosphatidylinositols (PI)	rs1812685	chr6:11047476	C / T	-0.0464	0.0076	8.928e-10	LOC100506409	ELOVL2-LOC100506409
909.55	PI(40:6)_[M-H]1-	Glycerophospholipids (GP)	Glycerophosphoinositols	Phosphatidylinositols (PI)	rs6920155	chr6:11047956	A / C	-0.0475	0.0074	1.432e-10	LOC100506409	ELOVL2-LOC100506409
909.55	PI(40:6)_[M-H]1-	Glycerophospholipids (GP)	Glycerophosphoinositols	Phosphatidylinositols (PI)	rs6456810	chr6:11052418	A / C	-0.0466	0.0076	7.903e-10	LOC100506409	ELOVL2-LOC100506409
806.569	PC(38:6)_[M+H]1+ / PE(41:6)_[M+H]1+	Glycerophospholipids (GP)	Glycerophosphocholines	Phosphatidylcholines (PC)	rs9393915	chr6:11072322	T / C	-0.0393	0.0064	8.322e-10	LOC100506409	ELOVL2-LOC100506409
909.55	PI(40:6)_[M-H]1-	Glycerophospholipids (GP)	Glycerophosphoinositols	Phosphatidylinositols (PI)	rs2024980	chr6:11074688	C / T	-0.0454	0.0073	6.265e-10	LOC100506409	ELOVL2-LOC100506409
909.55	PI(40:6)_[M-H]1-	Glycerophospholipids (GP)	Glycerophosphoinositols	Phosphatidylinositols (PI)	rs61390967	chr6:11075200	G / A	-0.0455	0.0074	8.001e-10	LOC100506409	ELOVL2-LOC100506409
687.545	SM(34:1)_[M-CH3]1-	Sphingolipids (SP)	Phosphosphingolipids	Sphingomyelins (SM)	chr7:73042302:D	chr7:73042302	G / GCTTT	0.0571	0.0093	7.759e-10	MLXIPL	MLXIPL
689.56	SM(34:0)_[M-CH3]1-	Sphingolipids (SP)	Phosphosphingolipids	Sphingomyelins (SM)	chr7:73042302:D	chr7:73042302	G / GCTTT	0.0599	0.0097	6.023e-10	MLXIPL	MLXIPL
575.504	DG(34:2)_[M+H-H2O]1+	Glycerolipids (GL)	Diradylglycerols	Diacylglycerols (DG)	rs12679834	chr8:19820433	C / T	-0.0715	0.0114	4.133e-10	LPL	LPL
577.519	DG(34:1)_[M+H-H2O]1+	Glycerolipids (GL)	Diradylglycerols	Diacylglycerols (DG)	rs12679834	chr8:19820433	C / T	-0.0785	0.0125	3.514e-10	LPL	LPL
811.669	SM(42:3)_[M+H]1+	Sphingolipids (SP)	Phosphosphingolipids	Sphingomyelins (SM)	rs12679834	chr8:19820433	C / T	0.0628	0.0102	6.404e-10	LPL	LPL
888.802	TG(53:3)_[M+NH4]1+	Glycerolipids (GL)	Triradylglycerols	Triacylglycerols (TG)	rs12679834	chr8:19820433	C / T	-0.0796	0.0128	5.002e-10	LPL	LPL
890.817	TG(53:2)_[M+NH4]1+	Glycerolipids (GL)	Triradylglycerols	Triacylglycerols (TG)	rs12679834	chr8:19820433	C / T	-0.0875	0.0143	8.627e-10	LPL	LPL
575.504	DG(34:2)_[M+H-H2O]1+	Glycerolipids (GL)	Diradylglycerols	Diacylglycerols (DG)	rs117199990	chr8:19820916	T / C	-0.0731	0.0116	3.302e-10	LPL	LPL
577.519	DG(34:1)_[M+H-H2O]1+	Glycerolipids (GL)	Diradylglycerols	Diacylglycerols (DG)	rs117199990	chr8:19820916	T / C	-0.0813	0.0127	1.458e-10	LPL	LPL
579.535	DG(34:0)_[M+H-H2O]1+	Glycerolipids (GL)	Diradylglycerols	Diacylglycerols (DG)	rs117199990	chr8:19820916	T / C	-0.0947	0.0152	5.113e-10	LPL	LPL
603.535	DG(36:2)_[M+H-H2O]1+	Glycerolipids (GL)	Diradylglycerols	Diacylglycerols (DG)	rs117199990	chr8:19820916	T / C	-0.0689	0.0109	2.895e-10	LPL	LPL
605.551	DG(36:1)_[M+H-H2O]1+	Glycerolipids (GL)	Diradylglycerols	Diacylglycerols (DG)	rs117199990	chr8:19820916	T / C	-0.0847	0.0136	4.957e-10	LPL	LPL
692.634	CE(20:3)_[M+NH4]1+	Sterol lipids (ST)	Sterols	Cholesteryl esters (CE)	rs117199990	chr8:19820916	T / C	0.0635	0.0102	4.449e-10	LPL	LPL
809.653	SM(42:4)_[M+H]1+	Sphingolipids (SP)	Phosphosphingolipids	Sphingomyelins (SM)	rs117199990	chr8:19820916	T / C	0.0703	0.0112	3.15e-10	LPL	LPL
811.669	SM(42:3)_[M+H]1+	Sphingolipids (SP)	Phosphosphingolipids	Sphingomyelins (SM)	rs117199990	chr8:19820916	T / C	0.0652	0.0103	2.467e-10	LPL	LPL
874.786	TG(52:3)_[M+NH4]1+	Glycerolipids (GL)	Triradylglycerols	Triacylglycerols (TG)	rs117199990	chr8:19820916	T / C	-0.0712	0.0115	6.176e-10	LPL	LPL
876.802	TG(52:2)_[M+NH4]1+	Glycerolipids (GL)	Triradylglycerols	Triacylglycerols (TG)	rs117199990	chr8:19820916	T / C	-0.0791	0.0128	6.816e-10	LPL	LPL
888.802	TG(53:3)_[M+NH4]1+	Glycerolipids (GL)	Triradylglycerols	Triacylglycerols (TG)	rs117199990	chr8:19820916	T / C	-0.0821	0.013	2.486e-10	LPL	LPL
890.817	TG(53:2)_[M+NH4]1+	Glycerolipids (GL)	Triradylglycerols	Triacylglycerols (TG)	rs117199990	chr8:19820916	T / C	-0.0909	0.0145	3.481e-10	LPL	LPL
575.504	DG(34:2)_[M+H-H2O]1+	Glycerolipids (GL)	Diradylglycerols	Diacylglycerols (DG)	rs145391587	chr8:19820933	C / A	-0.0724	0.0118	8.572e-10	LPL	LPL
577.519	DG(34:1)_[M+H-H2O]1+	Glycerolipids (GL)	Diradylglycerols	Diacylglycerols (DG)	rs145391587	chr8:19820933	C / A	-0.0795	0.0129	7.271e-10	LPL	LPL
811.669	SM(42:3)_[M+H]1+	Sphingolipids (SP)	Phosphosphingolipids	Sphingomyelins (SM)	rs145391587	chr8:19820933	C / A	0.0652	0.0105	4.875e-10	LPL	LPL
888.802	TG(53:3)_[M+NH4]1+	Glycerolipids (GL)	Triradylglycerols	Triacylglycerols (TG)	rs145391587	chr8:19820933	C / A	-0.0811	0.0132	7.237e-10	LPL	LPL
575.504	DG(34:2)_[M+H-H2O]1+	Glycerolipids (GL)	Diradylglycerols	Diacylglycerols (DG)	rs75278536	chr8:19821425	G / T	-0.0709	0.0114	5.709e-10	LPL	LPL
577.519	DG(34:1)_[M+H-H2O]1+	Glycerolipids (GL)	Diradylglycerols	Diacylglycerols (DG)	rs75278536	chr8:19821425	G / T	-0.0776	0.0125	5.739e-10	LPL	LPL
811.669	SM(42:3)_[M+H]1+	Sphingolipids (SP)	Phosphosphingolipids	Sphingomyelins (SM)	rs75278536	chr8:19821425	G / T	0.0627	0.0102	6.99e-10	LPL	LPL
888.802	TG(53:3)_[M+NH4]1+	Glycerolipids (GL)	Triradylglycerols	Triacylglycerols (TG)	rs75278536	chr8:19821425	G / T	-0.0788	0.0128	6.657e-10	LPL	LPL
575.504	DG(34:2)_[M+H-H2O]1+	Glycerolipids (GL)	Diradylglycerols	Diacylglycerols (DG)	rs77069344	chr8:19821782	G / T	-0.071	0.0114	5.337e-10	LPL	LPL
577.519	DG(34:1)_[M+H-H2O]1+	Glycerolipids (GL)	Diradylglycerols	Diacylglycerols (DG)	rs77069344	chr8:19821782	G / T	-0.0776	0.0125	4.992e-10	LPL	LPL
811.669	SM(42:3)_[M+H]1+	Sphingolipids (SP)	Phosphosphingolipids	Sphingomyelins (SM)	rs77069344	chr8:19821782	G / T	0.0627	0.0102	6.734e-10	LPL	LPL
888.802	TG(53:3)_[M+NH4]1+	Glycerolipids (GL)	Triradylglycerols	Triacylglycerols (TG)	rs77069344	chr8:19821782	G / T	-0.0788	0.0128	6.657e-10	LPL	LPL
575.504	DG(34:2)_[M+H-H2O]1+	Glycerolipids (GL)	Diradylglycerols	Diacylglycerols (DG)	rs11570891	chr8:19822810	T / C	-0.0712	0.0114	4.664e-10	LPL	LPL
577.519	DG(34:1)_[M+H-H2O]1+	Glycerolipids (GL)	Diradylglycerols	Diacylglycerols (DG)	rs11570891	chr8:19822810	T / C	-0.0776	0.0125	4.992e-10	LPL	LPL
811.669	SM(42:3)_[M+H]1+	Sphingolipids (SP)	Phosphosphingolipids	Sphingomyelins (SM)	rs11570891	chr8:19822810	T / C	0.0628	0.0102	6.569e-10	LPL	LPL
888.802	TG(53:3)_[M+NH4]1+	Glycerolipids (GL)	Triradylglycerols	Triacylglycerols (TG)	rs11570891	chr8:19822810	T / C	-0.0788	0.0128	6.578e-10	LPL	LPL
575.504	DG(34:2)_[M+H-H2O]1+	Glycerolipids (GL)	Diradylglycerols	Diacylglycerols (DG)	rs1803924	chr8:19823674	T / C	-0.0714	0.0114	3.711e-10	LPL	LPL
577.519	DG(34:1)_[M+H-H2O]1+	Glycerolipids (GL)	Diradylglycerols	Diacylglycerols (DG)	rs1803924	chr8:19823674	T / C	-0.0775	0.0125	5.051e-10	LPL	LPL
811.669	SM(42:3)_[M+H]1+	Sphingolipids (SP)	Phosphosphingolipids	Sphingomyelins (SM)	rs1803924	chr8:19823674	T / C	0.0628	0.0101	5.495e-10	LPL	LPL
888.802	TG(53:3)_[M+NH4]1+	Glycerolipids (GL)	Triradylglycerols	Triacylglycerols (TG)	rs1803924	chr8:19823674	T / C	-0.0786	0.0127	6.178e-10	LPL	LPL
575.504	DG(34:2)_[M+H-H2O]1+	Glycerolipids (GL)	Diradylglycerols	Diacylglycerols (DG)	rs3735964	chr8:19824045	A / C	-0.0714	0.0114	3.585e-10	LPL	LPL
577.519	DG(34:1)_[M+H-H2O]1+	Glycerolipids (GL)	Diradylglycerols	Diacylglycerols (DG)	rs3735964	chr8:19824045	A / C	-0.0774	0.0124	4.525e-10	LPL	LPL
811.669	SM(42:3)_[M+H]1+	Sphingolipids (SP)	Phosphosphingolipids	Sphingomyelins (SM)	rs3735964	chr8:19824045	A / C	0.0628	0.0101	5.495e-10	LPL	LPL
888.802	TG(53:3)_[M+NH4]1+	Glycerolipids (GL)	Triradylglycerols	Triacylglycerols (TG)	rs3735964	chr8:19824045	A / C	-0.0786	0.0127	6.295e-10	LPL	LPL
575.504	DG(34:2)_[M+H-H2O]1+	Glycerolipids (GL)	Diradylglycerols	Diacylglycerols (DG)	rs1059611	chr8:19824563	C / T	-0.0718	0.0113	2.409e-10	LPL	LPL
577.519	DG(34:1)_[M+H-H2O]1+	Glycerolipids (GL)	Diradylglycerols	Diacylglycerols (DG)	rs1059611	chr8:19824563	C / T	-0.0779	0.0124	3.242e-10	LPL	LPL
811.669	SM(42:3)_[M+H]1+	Sphingolipids (SP)	Phosphosphingolipids	Sphingomyelins (SM)	rs1059611	chr8:19824563	C / T	0.0625	0.01	4.974e-10	LPL	LPL
874.786	TG(52:3)_[M+NH4]1+	Glycerolipids (GL)	Triradylglycerols	Triacylglycerols (TG)	rs1059611	chr8:19824563	C / T	-0.0696	0.0112	5.475e-10	LPL	LPL
888.802	TG(53:3)_[M+NH4]1+	Glycerolipids (GL)	Triradylglycerols	Triacylglycerols (TG)	rs1059611	chr8:19824563	C / T	-0.0792	0.0126	3.389e-10	LPL	LPL
575.504	DG(34:2)_[M+H-H2O]1+	Glycerolipids (GL)	Diradylglycerols	Diacylglycerols (DG)	chr8:19824626:I	chr8:19824626	CTT / C	-0.0703	0.0113	4.792e-10	LPL	LPL
811.669	SM(42:3)_[M+H]1+	Sphingolipids (SP)	Phosphosphingolipids	Sphingomyelins (SM)	chr8:19824626:I	chr8:19824626	CTT / C	0.0619	0.01	7.168e-10	LPL	LPL
888.802	TG(53:3)_[M+NH4]1+	Glycerolipids (GL)	Triradylglycerols	Triacylglycerols (TG)	chr8:19824626:I	chr8:19824626	CTT / C	-0.0783	0.0126	4.899e-10	LPL	LPL
888.802	TG(53:3)_[M+NH4]1+	Glycerolipids (GL)	Triradylglycerols	Triacylglycerols (TG)	rs77150190	chr8:19826302	C / G	-0.0787	0.0128	7.788e-10	LPL	LPL
888.802	TG(53:3)_[M+NH4]1+	Glycerolipids (GL)	Triradylglycerols	Triacylglycerols (TG)	rs77729186	chr8:19826318	G / A	-0.0787	0.0128	8.031e-10	LPL	LPL
888.802	TG(53:3)_[M+NH4]1+	Glycerolipids (GL)	Triradylglycerols	Triacylglycerols (TG)	rs79108221	chr8:19826701	T / C	-0.0789	0.0128	7.323e-10	LPL	LPL
575.504	DG(34:2)_[M+H-H2O]1+	Glycerolipids (GL)	Diradylglycerols	Diacylglycerols (DG)	rs1011685	chr8:19830769	T / C	-0.0709	0.0114	5.601e-10	LPL	LPL
577.519	DG(34:1)_[M+H-H2O]1+	Glycerolipids (GL)	Diradylglycerols	Diacylglycerols (DG)	rs1011685	chr8:19830769	T / C	-0.0775	0.0125	6.372e-10	LPL	LPL
692.634	CE(20:3)_[M+NH4]1+	Sterol lipids (ST)	Sterols	Cholesteryl esters (CE)	rs1011685	chr8:19830769	T / C	0.0627	0.01	4.31e-10	LPL	LPL
809.653	SM(42:4)_[M+H]1+	Sphingolipids (SP)	Phosphosphingolipids	Sphingomyelins (SM)	rs1011685	chr8:19830769	T / C	0.0673	0.011	8.889e-10	LPL	LPL
811.669	SM(42:3)_[M+H]1+	Sphingolipids (SP)	Phosphosphingolipids	Sphingomyelins (SM)	rs1011685	chr8:19830769	T / C	0.063	0.0102	5.655e-10	LPL	LPL
888.802	TG(53:3)_[M+NH4]1+	Glycerolipids (GL)	Triradylglycerols	Triacylglycerols (TG)	rs1011685	chr8:19830769	T / C	-0.079	0.0128	5.838e-10	LPL	LPL
575.504	DG(34:2)_[M+H-H2O]1+	Glycerolipids (GL)	Diradylglycerols	Diacylglycerols (DG)	rs17482753	chr8:19832646	T / G	-0.0707	0.0114	6.195e-10	LPL	LPL
577.519	DG(34:1)_[M+H-H2O]1+	Glycerolipids (GL)	Diradylglycerols	Diacylglycerols (DG)	rs17482753	chr8:19832646	T / G	-0.0774	0.0125	6.913e-10	LPL	LPL
692.634	CE(20:3)_[M+NH4]1+	Sterol lipids (ST)	Sterols	Cholesteryl esters (CE)	rs17482753	chr8:19832646	T / G	0.0627	0.01	4.2e-10	LPL	LPL
811.669	SM(42:3)_[M+H]1+	Sphingolipids (SP)	Phosphosphingolipids	Sphingomyelins (SM)	rs17482753	chr8:19832646	T / G	0.0626	0.0102	7.083e-10	LPL	LPL
888.802	TG(53:3)_[M+NH4]1+	Glycerolipids (GL)	Triradylglycerols	Triacylglycerols (TG)	rs17482753	chr8:19832646	T / G	-0.0785	0.0128	8.769e-10	LPL	LPL
575.504	DG(34:2)_[M+H-H2O]1+	Glycerolipids (GL)	Diradylglycerols	Diacylglycerols (DG)	rs78963197	chr8:19836646	C / T	-0.0705	0.0115	8.132e-10	LPL	LPL
577.519	DG(34:1)_[M+H-H2O]1+	Glycerolipids (GL)	Diradylglycerols	Diacylglycerols (DG)	rs78963197	chr8:19836646	C / T	-0.0778	0.0125	5.431e-10	LPL	LPL
692.634	CE(20:3)_[M+NH4]1+	Sterol lipids (ST)	Sterols	Cholesteryl esters (CE)	rs78963197	chr8:19836646	C / T	0.0622	0.0101	7.685e-10	LPL	LPL
809.653	SM(42:4)_[M+H]1+	Sphingolipids (SP)	Phosphosphingolipids	Sphingomyelins (SM)	rs78963197	chr8:19836646	C / T	0.0679	0.011	7.489e-10	LPL	LPL
811.669	SM(42:3)_[M+H]1+	Sphingolipids (SP)	Phosphosphingolipids	Sphingomyelins (SM)	rs78963197	chr8:19836646	C / T	0.0634	0.0102	4.398e-10	LPL	LPL
575.504	DG(34:2)_[M+H-H2O]1+	Glycerolipids (GL)	Diradylglycerols	Diacylglycerols (DG)	rs74855321	chr8:19836984	T / C	-0.0706	0.0115	7.956e-10	LPL	LPL
577.519	DG(34:1)_[M+H-H2O]1+	Glycerolipids (GL)	Diradylglycerols	Diacylglycerols (DG)	rs74855321	chr8:19836984	T / C	-0.0779	0.0125	5.326e-10	LPL	LPL
692.634	CE(20:3)_[M+NH4]1+	Sterol lipids (ST)	Sterols	Cholesteryl esters (CE)	rs74855321	chr8:19836984	T / C	0.0622	0.0101	7.685e-10	LPL	LPL
809.653	SM(42:4)_[M+H]1+	Sphingolipids (SP)	Phosphosphingolipids	Sphingomyelins (SM)	rs74855321	chr8:19836984	T / C	0.0679	0.011	7.489e-10	LPL	LPL
811.669	SM(42:3)_[M+H]1+	Sphingolipids (SP)	Phosphosphingolipids	Sphingomyelins (SM)	rs74855321	chr8:19836984	T / C	0.0635	0.0102	4.235e-10	LPL	LPL
577.519	DG(34:1)_[M+H-H2O]1+	Glycerolipids (GL)	Diradylglycerols	Diacylglycerols (DG)	rs58946909	chr8:19840341	A / G	-0.0779	0.0126	5.644e-10	LPL	LPL
692.634	CE(20:3)_[M+NH4]1+	Sterol lipids (ST)	Sterols	Cholesteryl esters (CE)	rs58946909	chr8:19840341	A / G	0.062	0.0101	8.797e-10	LPL	LPL
809.653	SM(42:4)_[M+H]1+	Sphingolipids (SP)	Phosphosphingolipids	Sphingomyelins (SM)	rs58946909	chr8:19840341	A / G	0.0682	0.0111	6.933e-10	LPL	LPL
811.669	SM(42:3)_[M+H]1+	Sphingolipids (SP)	Phosphosphingolipids	Sphingomyelins (SM)	rs58946909	chr8:19840341	A / G	0.0632	0.0102	5.442e-10	LPL	LPL
575.504	DG(34:2)_[M+H-H2O]1+	Glycerolipids (GL)	Diradylglycerols	Diacylglycerols (DG)	rs75551077	chr8:19840408	C / G	-0.0705	0.0114	7.042e-10	LPL	LPL
577.519	DG(34:1)_[M+H-H2O]1+	Glycerolipids (GL)	Diradylglycerols	Diacylglycerols (DG)	rs75551077	chr8:19840408	C / G	-0.0792	0.0125	2.711e-10	LPL	LPL
579.535	DG(34:0)_[M+H-H2O]1+	Glycerolipids (GL)	Diradylglycerols	Diacylglycerols (DG)	rs75551077	chr8:19840408	C / G	-0.0926	0.0151	7.977e-10	LPL	LPL
692.634	CE(20:3)_[M+NH4]1+	Sterol lipids (ST)	Sterols	Cholesteryl esters (CE)	rs75551077	chr8:19840408	C / G	0.0621	0.01	6.051e-10	LPL	LPL
809.653	SM(42:4)_[M+H]1+	Sphingolipids (SP)	Phosphosphingolipids	Sphingomyelins (SM)	rs75551077	chr8:19840408	C / G	0.0682	0.011	5.178e-10	LPL	LPL
811.669	SM(42:3)_[M+H]1+	Sphingolipids (SP)	Phosphosphingolipids	Sphingomyelins (SM)	rs75551077	chr8:19840408	C / G	0.0633	0.0102	5.061e-10	LPL	LPL
575.504	DG(34:2)_[M+H-H2O]1+	Glycerolipids (GL)	Diradylglycerols	Diacylglycerols (DG)	rs113988682	chr8:19842768	G / C	-0.0709	0.0115	7.407e-10	LPL	LPL
577.519	DG(34:1)_[M+H-H2O]1+	Glycerolipids (GL)	Diradylglycerols	Diacylglycerols (DG)	rs113988682	chr8:19842768	G / C	-0.0784	0.0126	4.328e-10	LPL	LPL
692.634	CE(20:3)_[M+NH4]1+	Sterol lipids (ST)	Sterols	Cholesteryl esters (CE)	rs113988682	chr8:19842768	G / C	0.0621	0.0101	8.366e-10	LPL	LPL
809.653	SM(42:4)_[M+H]1+	Sphingolipids (SP)	Phosphosphingolipids	Sphingomyelins (SM)	rs113988682	chr8:19842768	G / C	0.0682	0.0111	6.871e-10	LPL	LPL
811.669	SM(42:3)_[M+H]1+	Sphingolipids (SP)	Phosphosphingolipids	Sphingomyelins (SM)	rs113988682	chr8:19842768	G / C	0.0639	0.0102	3.586e-10	LPL	LPL
575.504	DG(34:2)_[M+H-H2O]1+	Glycerolipids (GL)	Diradylglycerols	Diacylglycerols (DG)	rs17410914	chr8:19843462	A / C	-0.0715	0.0115	5.208e-10	LPL	LPL
577.519	DG(34:1)_[M+H-H2O]1+	Glycerolipids (GL)	Diradylglycerols	Diacylglycerols (DG)	rs17410914	chr8:19843462	A / C	-0.079	0.0126	3.831e-10	LPL	LPL
809.653	SM(42:4)_[M+H]1+	Sphingolipids (SP)	Phosphosphingolipids	Sphingomyelins (SM)	rs17410914	chr8:19843462	A / C	0.0685	0.0111	5.809e-10	LPL	LPL
811.669	SM(42:3)_[M+H]1+	Sphingolipids (SP)	Phosphosphingolipids	Sphingomyelins (SM)	rs17410914	chr8:19843462	A / C	0.0641	0.0102	3.8e-10	LPL	LPL
888.802	TG(53:3)_[M+NH4]1+	Glycerolipids (GL)	Triradylglycerols	Triacylglycerols (TG)	rs17410914	chr8:19843462	A / C	-0.079	0.0129	7.989e-10	LPL	LPL
575.504	DG(34:2)_[M+H-H2O]1+	Glycerolipids (GL)	Diradylglycerols	Diacylglycerols (DG)	rs75802599	chr8:19843579	C / G	-0.0725	0.0117	6.617e-10	LPL	LPL
577.519	DG(34:1)_[M+H-H2O]1+	Glycerolipids (GL)	Diradylglycerols	Diacylglycerols (DG)	rs75802599	chr8:19843579	C / G	-0.0797	0.0129	5.629e-10	LPL	LPL
811.669	SM(42:3)_[M+H]1+	Sphingolipids (SP)	Phosphosphingolipids	Sphingomyelins (SM)	rs75802599	chr8:19843579	C / G	0.0642	0.0104	8.205e-10	LPL	LPL
888.802	TG(53:3)_[M+NH4]1+	Glycerolipids (GL)	Triradylglycerols	Triacylglycerols (TG)	rs75802599	chr8:19843579	C / G	-0.0812	0.0131	6.598e-10	LPL	LPL
575.504	DG(34:2)_[M+H-H2O]1+	Glycerolipids (GL)	Diradylglycerols	Diacylglycerols (DG)	rs117227752	chr8:19843861	A / G	-0.0727	0.0117	6.208e-10	LPL	LPL
577.519	DG(34:1)_[M+H-H2O]1+	Glycerolipids (GL)	Diradylglycerols	Diacylglycerols (DG)	rs117227752	chr8:19843861	A / G	-0.0798	0.0129	5.256e-10	LPL	LPL
811.669	SM(42:3)_[M+H]1+	Sphingolipids (SP)	Phosphosphingolipids	Sphingomyelins (SM)	rs117227752	chr8:19843861	A / G	0.0643	0.0104	7.633e-10	LPL	LPL
888.802	TG(53:3)_[M+NH4]1+	Glycerolipids (GL)	Triradylglycerols	Triacylglycerols (TG)	rs117227752	chr8:19843861	A / G	-0.0813	0.0131	6.131e-10	LPL	LPL
811.669	SM(42:3)_[M+H]1+	Sphingolipids (SP)	Phosphosphingolipids	Sphingomyelins (SM)	rs7819706	chr8:19844415	G / A	0.0595	0.0096	6.653e-10	LPL	LPL
575.504	DG(34:2)_[M+H-H2O]1+	Glycerolipids (GL)	Diradylglycerols	Diacylglycerols (DG)	rs115129770	chr8:19844439	G / C	-0.071	0.0115	6.8e-10	LPL	LPL
577.519	DG(34:1)_[M+H-H2O]1+	Glycerolipids (GL)	Diradylglycerols	Diacylglycerols (DG)	rs115129770	chr8:19844439	G / C	-0.0789	0.0126	3.476e-10	LPL	LPL
809.653	SM(42:4)_[M+H]1+	Sphingolipids (SP)	Phosphosphingolipids	Sphingomyelins (SM)	rs115129770	chr8:19844439	G / C	0.0685	0.0111	5.785e-10	LPL	LPL
811.669	SM(42:3)_[M+H]1+	Sphingolipids (SP)	Phosphosphingolipids	Sphingomyelins (SM)	rs115129770	chr8:19844439	G / C	0.0643	0.0102	2.707e-10	LPL	LPL
888.802	TG(53:3)_[M+NH4]1+	Glycerolipids (GL)	Triradylglycerols	Triacylglycerols (TG)	rs115129770	chr8:19844439	G / C	-0.0792	0.0128	6.614e-10	LPL	LPL
890.817	TG(53:2)_[M+NH4]1+	Glycerolipids (GL)	Triradylglycerols	Triacylglycerols (TG)	rs115129770	chr8:19844439	G / C	-0.0882	0.0144	8.092e-10	LPL	LPL
575.504	DG(34:2)_[M+H-H2O]1+	Glycerolipids (GL)	Diradylglycerols	Diacylglycerols (DG)	chr8:19844447:D	chr8:19844447	C / CT	-0.071	0.0115	6.8e-10	LPL	LPL
577.519	DG(34:1)_[M+H-H2O]1+	Glycerolipids (GL)	Diradylglycerols	Diacylglycerols (DG)	chr8:19844447:D	chr8:19844447	C / CT	-0.0789	0.0126	3.476e-10	LPL	LPL
809.653	SM(42:4)_[M+H]1+	Sphingolipids (SP)	Phosphosphingolipids	Sphingomyelins (SM)	chr8:19844447:D	chr8:19844447	C / CT	0.0685	0.0111	5.785e-10	LPL	LPL
811.669	SM(42:3)_[M+H]1+	Sphingolipids (SP)	Phosphosphingolipids	Sphingomyelins (SM)	chr8:19844447:D	chr8:19844447	C / CT	0.0643	0.0102	2.707e-10	LPL	LPL
888.802	TG(53:3)_[M+NH4]1+	Glycerolipids (GL)	Triradylglycerols	Triacylglycerols (TG)	chr8:19844447:D	chr8:19844447	C / CT	-0.0792	0.0128	6.74e-10	LPL	LPL
890.817	TG(53:2)_[M+NH4]1+	Glycerolipids (GL)	Triradylglycerols	Triacylglycerols (TG)	chr8:19844447:D	chr8:19844447	C / CT	-0.0882	0.0144	8.092e-10	LPL	LPL
811.669	SM(42:3)_[M+H]1+	Sphingolipids (SP)	Phosphosphingolipids	Sphingomyelins (SM)	rs7841189	chr8:19845376	T / C	0.0599	0.0097	5.557e-10	LPL	LPL
575.504	DG(34:2)_[M+H-H2O]1+	Glycerolipids (GL)	Diradylglycerols	Diacylglycerols (DG)	rs78458743	chr8:19846314	G / T	-0.071	0.0115	6.722e-10	LPL	LPL
577.519	DG(34:1)_[M+H-H2O]1+	Glycerolipids (GL)	Diradylglycerols	Diacylglycerols (DG)	rs78458743	chr8:19846314	G / T	-0.0787	0.0126	3.988e-10	LPL	LPL
809.653	SM(42:4)_[M+H]1+	Sphingolipids (SP)	Phosphosphingolipids	Sphingomyelins (SM)	rs78458743	chr8:19846314	G / T	0.0684	0.0111	5.939e-10	LPL	LPL
811.669	SM(42:3)_[M+H]1+	Sphingolipids (SP)	Phosphosphingolipids	Sphingomyelins (SM)	rs78458743	chr8:19846314	G / T	0.0643	0.0102	2.813e-10	LPL	LPL
888.802	TG(53:3)_[M+NH4]1+	Glycerolipids (GL)	Triradylglycerols	Triacylglycerols (TG)	rs78458743	chr8:19846314	G / T	-0.0792	0.0129	7.062e-10	LPL	LPL
890.817	TG(53:2)_[M+NH4]1+	Glycerolipids (GL)	Triradylglycerols	Triacylglycerols (TG)	rs78458743	chr8:19846314	G / T	-0.0881	0.0144	8.733e-10	LPL	LPL
575.504	DG(34:2)_[M+H-H2O]1+	Glycerolipids (GL)	Diradylglycerols	Diacylglycerols (DG)	rs114566157	chr8:19846489	G / C	-0.0709	0.0115	6.231e-10	LPL	LPL
577.519	DG(34:1)_[M+H-H2O]1+	Glycerolipids (GL)	Diradylglycerols	Diacylglycerols (DG)	rs114566157	chr8:19846489	G / C	-0.0785	0.0126	4.622e-10	LPL	LPL
809.653	SM(42:4)_[M+H]1+	Sphingolipids (SP)	Phosphosphingolipids	Sphingomyelins (SM)	rs114566157	chr8:19846489	G / C	0.0677	0.011	7.468e-10	LPL	LPL
811.669	SM(42:3)_[M+H]1+	Sphingolipids (SP)	Phosphosphingolipids	Sphingomyelins (SM)	rs114566157	chr8:19846489	G / C	0.0638	0.0102	3.824e-10	LPL	LPL
888.802	TG(53:3)_[M+NH4]1+	Glycerolipids (GL)	Triradylglycerols	Triacylglycerols (TG)	rs114566157	chr8:19846489	G / C	-0.0788	0.0129	8.905e-10	LPL	LPL
575.504	DG(34:2)_[M+H-H2O]1+	Glycerolipids (GL)	Diradylglycerols	Diacylglycerols (DG)	rs12682115	chr8:19847060	A / G	-0.0705	0.0115	8.762e-10	LPL	LPL
577.519	DG(34:1)_[M+H-H2O]1+	Glycerolipids (GL)	Diradylglycerols	Diacylglycerols (DG)	rs12682115	chr8:19847060	A / G	-0.0785	0.0126	4.611e-10	LPL	LPL
809.653	SM(42:4)_[M+H]1+	Sphingolipids (SP)	Phosphosphingolipids	Sphingomyelins (SM)	rs12682115	chr8:19847060	A / G	0.0684	0.011	5.048e-10	LPL	LPL
811.669	SM(42:3)_[M+H]1+	Sphingolipids (SP)	Phosphosphingolipids	Sphingomyelins (SM)	rs12682115	chr8:19847060	A / G	0.0638	0.0102	3.819e-10	LPL	LPL
575.504	DG(34:2)_[M+H-H2O]1+	Glycerolipids (GL)	Diradylglycerols	Diacylglycerols (DG)	rs78013771	chr8:19847223	C / T	-0.0711	0.0115	6.645e-10	LPL	LPL
577.519	DG(34:1)_[M+H-H2O]1+	Glycerolipids (GL)	Diradylglycerols	Diacylglycerols (DG)	rs78013771	chr8:19847223	C / T	-0.0786	0.0126	4.196e-10	LPL	LPL
809.653	SM(42:4)_[M+H]1+	Sphingolipids (SP)	Phosphosphingolipids	Sphingomyelins (SM)	rs78013771	chr8:19847223	C / T	0.0683	0.0111	6.373e-10	LPL	LPL
811.669	SM(42:3)_[M+H]1+	Sphingolipids (SP)	Phosphosphingolipids	Sphingomyelins (SM)	rs78013771	chr8:19847223	C / T	0.0641	0.0102	3.037e-10	LPL	LPL
888.802	TG(53:3)_[M+NH4]1+	Glycerolipids (GL)	Triradylglycerols	Triacylglycerols (TG)	rs78013771	chr8:19847223	C / T	-0.0793	0.0129	6.768e-10	LPL	LPL
575.504	DG(34:2)_[M+H-H2O]1+	Glycerolipids (GL)	Diradylglycerols	Diacylglycerols (DG)	rs76496571	chr8:19847441	A / C	-0.0711	0.0115	6.645e-10	LPL	LPL
577.519	DG(34:1)_[M+H-H2O]1+	Glycerolipids (GL)	Diradylglycerols	Diacylglycerols (DG)	rs76496571	chr8:19847441	A / C	-0.0786	0.0126	4.33e-10	LPL	LPL
809.653	SM(42:4)_[M+H]1+	Sphingolipids (SP)	Phosphosphingolipids	Sphingomyelins (SM)	rs76496571	chr8:19847441	A / C	0.0683	0.0111	6.457e-10	LPL	LPL
811.669	SM(42:3)_[M+H]1+	Sphingolipids (SP)	Phosphosphingolipids	Sphingomyelins (SM)	rs76496571	chr8:19847441	A / C	0.0641	0.0102	3.037e-10	LPL	LPL
888.802	TG(53:3)_[M+NH4]1+	Glycerolipids (GL)	Triradylglycerols	Triacylglycerols (TG)	rs76496571	chr8:19847441	A / C	-0.0793	0.0129	6.768e-10	LPL	LPL
811.669	SM(42:3)_[M+H]1+	Sphingolipids (SP)	Phosphosphingolipids	Sphingomyelins (SM)	rs17410962	chr8:19848080	A / G	0.0592	0.0096	7.226e-10	LPL	LPL
575.504	DG(34:2)_[M+H-H2O]1+	Glycerolipids (GL)	Diradylglycerols	Diacylglycerols (DG)	rs17489185	chr8:19848499	C / G	-0.0712	0.0115	5.282e-10	LPL	LPL
577.519	DG(34:1)_[M+H-H2O]1+	Glycerolipids (GL)	Diradylglycerols	Diacylglycerols (DG)	rs17489185	chr8:19848499	C / G	-0.0787	0.0126	4.145e-10	LPL	LPL
809.653	SM(42:4)_[M+H]1+	Sphingolipids (SP)	Phosphosphingolipids	Sphingomyelins (SM)	rs17489185	chr8:19848499	C / G	0.0683	0.011	5.496e-10	LPL	LPL
811.669	SM(42:3)_[M+H]1+	Sphingolipids (SP)	Phosphosphingolipids	Sphingomyelins (SM)	rs17489185	chr8:19848499	C / G	0.0642	0.0102	2.884e-10	LPL	LPL
888.802	TG(53:3)_[M+NH4]1+	Glycerolipids (GL)	Triradylglycerols	Triacylglycerols (TG)	rs17489185	chr8:19848499	C / G	-0.0791	0.0129	7.698e-10	LPL	LPL
575.504	DG(34:2)_[M+H-H2O]1+	Glycerolipids (GL)	Diradylglycerols	Diacylglycerols (DG)	rs17410983	chr8:19848693	T / C	-0.0707	0.0115	6.914e-10	LPL	LPL
577.519	DG(34:1)_[M+H-H2O]1+	Glycerolipids (GL)	Diradylglycerols	Diacylglycerols (DG)	rs17410983	chr8:19848693	T / C	-0.0785	0.0126	4.501e-10	LPL	LPL
809.653	SM(42:4)_[M+H]1+	Sphingolipids (SP)	Phosphosphingolipids	Sphingomyelins (SM)	rs17410983	chr8:19848693	T / C	0.0683	0.011	5.496e-10	LPL	LPL
811.669	SM(42:3)_[M+H]1+	Sphingolipids (SP)	Phosphosphingolipids	Sphingomyelins (SM)	rs17410983	chr8:19848693	T / C	0.0637	0.0102	4.067e-10	LPL	LPL
575.504	DG(34:2)_[M+H-H2O]1+	Glycerolipids (GL)	Diradylglycerols	Diacylglycerols (DG)	rs17489226	chr8:19848878	T / A	-0.0707	0.0115	6.914e-10	LPL	LPL
577.519	DG(34:1)_[M+H-H2O]1+	Glycerolipids (GL)	Diradylglycerols	Diacylglycerols (DG)	rs17489226	chr8:19848878	T / A	-0.0785	0.0126	4.501e-10	LPL	LPL
809.653	SM(42:4)_[M+H]1+	Sphingolipids (SP)	Phosphosphingolipids	Sphingomyelins (SM)	rs17489226	chr8:19848878	T / A	0.0682	0.011	5.572e-10	LPL	LPL
811.669	SM(42:3)_[M+H]1+	Sphingolipids (SP)	Phosphosphingolipids	Sphingomyelins (SM)	rs17489226	chr8:19848878	T / A	0.0637	0.0102	4.067e-10	LPL	LPL
575.504	DG(34:2)_[M+H-H2O]1+	Glycerolipids (GL)	Diradylglycerols	Diacylglycerols (DG)	rs17410996	chr8:19849272	G / T	-0.0713	0.0115	5.046e-10	LPL	LPL
577.519	DG(34:1)_[M+H-H2O]1+	Glycerolipids (GL)	Diradylglycerols	Diacylglycerols (DG)	rs17410996	chr8:19849272	G / T	-0.0787	0.0126	4.176e-10	LPL	LPL
809.653	SM(42:4)_[M+H]1+	Sphingolipids (SP)	Phosphosphingolipids	Sphingomyelins (SM)	rs17410996	chr8:19849272	G / T	0.0679	0.011	6.657e-10	LPL	LPL
811.669	SM(42:3)_[M+H]1+	Sphingolipids (SP)	Phosphosphingolipids	Sphingomyelins (SM)	rs17410996	chr8:19849272	G / T	0.064	0.0102	3.235e-10	LPL	LPL
575.504	DG(34:2)_[M+H-H2O]1+	Glycerolipids (GL)	Diradylglycerols	Diacylglycerols (DG)	rs75801420	chr8:19849670	G / T	-0.0711	0.0115	5.399e-10	LPL	LPL
577.519	DG(34:1)_[M+H-H2O]1+	Glycerolipids (GL)	Diradylglycerols	Diacylglycerols (DG)	rs75801420	chr8:19849670	G / T	-0.0784	0.0125	3.982e-10	LPL	LPL
809.653	SM(42:4)_[M+H]1+	Sphingolipids (SP)	Phosphosphingolipids	Sphingomyelins (SM)	rs75801420	chr8:19849670	G / T	0.0679	0.011	6.992e-10	LPL	LPL
811.669	SM(42:3)_[M+H]1+	Sphingolipids (SP)	Phosphosphingolipids	Sphingomyelins (SM)	rs75801420	chr8:19849670	G / T	0.0639	0.0102	3.628e-10	LPL	LPL
575.504	DG(34:2)_[M+H-H2O]1+	Glycerolipids (GL)	Diradylglycerols	Diacylglycerols (DG)	rs114964604	chr8:19849989	G / A	-0.0712	0.0115	5.323e-10	LPL	LPL
577.519	DG(34:1)_[M+H-H2O]1+	Glycerolipids (GL)	Diradylglycerols	Diacylglycerols (DG)	rs114964604	chr8:19849989	G / A	-0.0783	0.0125	4.248e-10	LPL	LPL
809.653	SM(42:4)_[M+H]1+	Sphingolipids (SP)	Phosphosphingolipids	Sphingomyelins (SM)	rs114964604	chr8:19849989	G / A	0.0678	0.011	7.343e-10	LPL	LPL
811.669	SM(42:3)_[M+H]1+	Sphingolipids (SP)	Phosphosphingolipids	Sphingomyelins (SM)	rs114964604	chr8:19849989	G / A	0.0638	0.0102	3.763e-10	LPL	LPL
575.504	DG(34:2)_[M+H-H2O]1+	Glycerolipids (GL)	Diradylglycerols	Diacylglycerols (DG)	rs79407615	chr8:19850099	G / T	-0.0711	0.0115	5.375e-10	LPL	LPL
577.519	DG(34:1)_[M+H-H2O]1+	Glycerolipids (GL)	Diradylglycerols	Diacylglycerols (DG)	rs79407615	chr8:19850099	G / T	-0.0782	0.0125	4.589e-10	LPL	LPL
809.653	SM(42:4)_[M+H]1+	Sphingolipids (SP)	Phosphosphingolipids	Sphingomyelins (SM)	rs79407615	chr8:19850099	G / T	0.0678	0.011	7.343e-10	LPL	LPL
811.669	SM(42:3)_[M+H]1+	Sphingolipids (SP)	Phosphosphingolipids	Sphingomyelins (SM)	rs79407615	chr8:19850099	G / T	0.0637	0.0102	3.955e-10	LPL	LPL
575.504	DG(34:2)_[M+H-H2O]1+	Glycerolipids (GL)	Diradylglycerols	Diacylglycerols (DG)	rs76975037	chr8:19851508	A / C	-0.0703	0.0114	6.075e-10	LPL	LPL
577.519	DG(34:1)_[M+H-H2O]1+	Glycerolipids (GL)	Diradylglycerols	Diacylglycerols (DG)	rs76975037	chr8:19851508	A / C	-0.077	0.0125	7.198e-10	LPL	LPL
809.653	SM(42:4)_[M+H]1+	Sphingolipids (SP)	Phosphosphingolipids	Sphingomyelins (SM)	rs76975037	chr8:19851508	A / C	0.0675	0.0109	6.586e-10	LPL	LPL
811.669	SM(42:3)_[M+H]1+	Sphingolipids (SP)	Phosphosphingolipids	Sphingomyelins (SM)	rs76975037	chr8:19851508	A / C	0.0629	0.0101	4.909e-10	LPL	LPL
575.504	DG(34:2)_[M+H-H2O]1+	Glycerolipids (GL)	Diradylglycerols	Diacylglycerols (DG)	rs17411024	chr8:19852134	A / G	-0.07	0.0113	6.773e-10	LPL	LPL
577.519	DG(34:1)_[M+H-H2O]1+	Glycerolipids (GL)	Diradylglycerols	Diacylglycerols (DG)	rs17411024	chr8:19852134	A / G	-0.0761	0.0124	8.42e-10	LPL	LPL
809.653	SM(42:4)_[M+H]1+	Sphingolipids (SP)	Phosphosphingolipids	Sphingomyelins (SM)	rs17411024	chr8:19852134	A / G	0.0672	0.0109	6.535e-10	LPL	LPL
811.669	SM(42:3)_[M+H]1+	Sphingolipids (SP)	Phosphosphingolipids	Sphingomyelins (SM)	rs17411024	chr8:19852134	A / G	0.0625	0.0101	5.89e-10	LPL	LPL
575.504	DG(34:2)_[M+H-H2O]1+	Glycerolipids (GL)	Diradylglycerols	Diacylglycerols (DG)	rs17411113	chr8:19855006	G / C	-0.0701	0.0113	6.4e-10	LPL	LPL
809.653	SM(42:4)_[M+H]1+	Sphingolipids (SP)	Phosphosphingolipids	Sphingomyelins (SM)	rs17411113	chr8:19855006	G / C	0.0669	0.0109	7.923e-10	LPL	LPL
811.669	SM(42:3)_[M+H]1+	Sphingolipids (SP)	Phosphosphingolipids	Sphingomyelins (SM)	rs17411113	chr8:19855006	G / C	0.0623	0.0101	6.094e-10	LPL	LPL
575.504	DG(34:2)_[M+H-H2O]1+	Glycerolipids (GL)	Diradylglycerols	Diacylglycerols (DG)	rs79236614	chr8:19860460	G / C	-0.0717	0.0114	2.79e-10	LPL	LPL
577.519	DG(34:1)_[M+H-H2O]1+	Glycerolipids (GL)	Diradylglycerols	Diacylglycerols (DG)	rs79236614	chr8:19860460	G / C	-0.0768	0.0125	7.191e-10	LPL	LPL
809.653	SM(42:4)_[M+H]1+	Sphingolipids (SP)	Phosphosphingolipids	Sphingomyelins (SM)	rs79236614	chr8:19860460	G / C	0.0671	0.0109	7.571e-10	LPL	LPL
811.669	SM(42:3)_[M+H]1+	Sphingolipids (SP)	Phosphosphingolipids	Sphingomyelins (SM)	rs79236614	chr8:19860460	G / C	0.0633	0.0101	3.635e-10	LPL	LPL
874.786	TG(52:3)_[M+NH4]1+	Glycerolipids (GL)	Triradylglycerols	Triacylglycerols (TG)	rs79236614	chr8:19860460	G / C	-0.0693	0.0112	7.076e-10	LPL	LPL
888.802	TG(53:3)_[M+NH4]1+	Glycerolipids (GL)	Triradylglycerols	Triacylglycerols (TG)	rs79236614	chr8:19860460	G / C	-0.0783	0.0127	6.593e-10	LPL	LPL
575.504	DG(34:2)_[M+H-H2O]1+	Glycerolipids (GL)	Diradylglycerols	Diacylglycerols (DG)	rs6586884	chr8:19863358	C / T	-0.0715	0.0113	2.589e-10	LPL	LPL
577.519	DG(34:1)_[M+H-H2O]1+	Glycerolipids (GL)	Diradylglycerols	Diacylglycerols (DG)	rs6586884	chr8:19863358	C / T	-0.0767	0.0123	5.28e-10	LPL	LPL
809.653	SM(42:4)_[M+H]1+	Sphingolipids (SP)	Phosphosphingolipids	Sphingomyelins (SM)	rs6586884	chr8:19863358	C / T	0.0669	0.0109	7.435e-10	LPL	LPL
811.669	SM(42:3)_[M+H]1+	Sphingolipids (SP)	Phosphosphingolipids	Sphingomyelins (SM)	rs6586884	chr8:19863358	C / T	0.0631	0.01	3.223e-10	LPL	LPL
874.786	TG(52:3)_[M+NH4]1+	Glycerolipids (GL)	Triradylglycerols	Triacylglycerols (TG)	rs6586884	chr8:19863358	C / T	-0.0688	0.0112	7.997e-10	LPL	LPL
575.504	DG(34:2)_[M+H-H2O]1+	Glycerolipids (GL)	Diradylglycerols	Diacylglycerols (DG)	rs6999813	chr8:19863471	A / T	-0.0715	0.0113	2.56e-10	LPL	LPL
577.519	DG(34:1)_[M+H-H2O]1+	Glycerolipids (GL)	Diradylglycerols	Diacylglycerols (DG)	rs6999813	chr8:19863471	A / T	-0.0767	0.0123	5.386e-10	LPL	LPL
811.669	SM(42:3)_[M+H]1+	Sphingolipids (SP)	Phosphosphingolipids	Sphingomyelins (SM)	rs6999813	chr8:19863471	A / T	0.0634	0.01	2.698e-10	LPL	LPL
874.786	TG(52:3)_[M+NH4]1+	Glycerolipids (GL)	Triradylglycerols	Triacylglycerols (TG)	rs6999813	chr8:19863471	A / T	-0.0687	0.0112	8.384e-10	LPL	LPL
575.504	DG(34:2)_[M+H-H2O]1+	Glycerolipids (GL)	Diradylglycerols	Diacylglycerols (DG)	rs77237194	chr8:19865455	T / A	-0.0718	0.0113	2.205e-10	LPL	LPL
577.519	DG(34:1)_[M+H-H2O]1+	Glycerolipids (GL)	Diradylglycerols	Diacylglycerols (DG)	rs77237194	chr8:19865455	T / A	-0.0769	0.0123	4.845e-10	LPL	LPL
811.669	SM(42:3)_[M+H]1+	Sphingolipids (SP)	Phosphosphingolipids	Sphingomyelins (SM)	rs77237194	chr8:19865455	T / A	0.0634	0.01	2.769e-10	LPL	LPL
874.786	TG(52:3)_[M+NH4]1+	Glycerolipids (GL)	Triradylglycerols	Triacylglycerols (TG)	rs77237194	chr8:19865455	T / A	-0.0687	0.0112	8.384e-10	LPL	LPL
809.653	SM(42:4)_[M+H]1+	Sphingolipids (SP)	Phosphosphingolipids	Sphingomyelins (SM)	rs78810414	chr8:19871113	T / C	0.0712	0.0111	1.679e-10	LPL	LPL
874.786	TG(52:3)_[M+NH4]1+	Glycerolipids (GL)	Triradylglycerols	Triacylglycerols (TG)	rs78810414	chr8:19871113	T / C	-0.0707	0.0115	8.817e-10	LPL	LPL
809.653	SM(42:4)_[M+H]1+	Sphingolipids (SP)	Phosphosphingolipids	Sphingomyelins (SM)	chr8:19874932:D	chr8:19874932	A / AAGAC	0.0754	0.0117	1.188e-10	LPL	LPL
874.786	TG(52:3)_[M+NH4]1+	Glycerolipids (GL)	Triradylglycerols	Triacylglycerols (TG)	chr8:19874932:D	chr8:19874932	A / AAGAC	-0.0746	0.0121	6.872e-10	LPL	LPL
809.653	SM(42:4)_[M+H]1+	Sphingolipids (SP)	Phosphosphingolipids	Sphingomyelins (SM)	rs28675909	chr8:19876234	T / A	0.0734	0.0116	2.471e-10	LPL	LPL
809.653	SM(42:4)_[M+H]1+	Sphingolipids (SP)	Phosphosphingolipids	Sphingomyelins (SM)	rs79198716	chr8:19876264	T / C	0.0733	0.0117	3.703e-10	LPL	LPL
874.786	TG(52:3)_[M+NH4]1+	Glycerolipids (GL)	Triradylglycerols	Triacylglycerols (TG)	rs77219697	chr8:19877461	C / T	-0.074	0.0121	8.709e-10	LPL	LPL
874.786	TG(52:3)_[M+NH4]1+	Glycerolipids (GL)	Triradylglycerols	Triacylglycerols (TG)	rs75082673	chr8:19879809	A / G	-0.074	0.0121	8.607e-10	LPL	LPL
874.786	TG(52:3)_[M+NH4]1+	Glycerolipids (GL)	Triradylglycerols	Triacylglycerols (TG)	rs11989309	chr8:19880330	T / C	-0.074	0.0121	8.607e-10	LPL	LPL
874.786	TG(52:3)_[M+NH4]1+	Glycerolipids (GL)	Triradylglycerols	Triacylglycerols (TG)	rs75675187	chr8:19880726	T / C	-0.074	0.0121	8.607e-10	LPL	LPL
874.786	TG(52:3)_[M+NH4]1+	Glycerolipids (GL)	Triradylglycerols	Triacylglycerols (TG)	rs78404258	chr8:19881058	G / A	-0.074	0.0121	8.607e-10	LPL	LPL
874.786	TG(52:3)_[M+NH4]1+	Glycerolipids (GL)	Triradylglycerols	Triacylglycerols (TG)	rs60223219	chr8:19881801	G / A	-0.0745	0.0121	6.714e-10	LPL	LPL
809.653	SM(42:4)_[M+H]1+	Sphingolipids (SP)	Phosphosphingolipids	Sphingomyelins (SM)	rs114650503	chr8:19884257	A / G	0.0733	0.0117	3.745e-10	LPL	LPL
874.786	TG(52:3)_[M+NH4]1+	Glycerolipids (GL)	Triradylglycerols	Triacylglycerols (TG)	rs114650503	chr8:19884257	A / G	-0.0744	0.0121	6.858e-10	LPL	LPL
809.653	SM(42:4)_[M+H]1+	Sphingolipids (SP)	Phosphosphingolipids	Sphingomyelins (SM)	rs9644639	chr8:19884947	G / C	0.0771	0.0118	7.51e-11	LPL	LPL
874.786	TG(52:3)_[M+NH4]1+	Glycerolipids (GL)	Triradylglycerols	Triacylglycerols (TG)	rs9644639	chr8:19884947	G / C	-0.0777	0.0123	2.225e-10	LPL	LPL
253.217	FA(16:1)_[M-H]1-	Fatty acyls (FA)	Fatty acids and conjugates	Free fatty acids (FA)	rs603424	chr10:102075479	A / G	-0.0741	0.012	5.8e-10	PKD2L1	SCD
494.325	LPC(16:1)_[M+H]1+ / LPE(19:1)_[M+H]1+	Glycerophospholipids (GP)	Glycerophosphocholines	Lysophosphatidylcholines (LPC)	rs603424	chr10:102075479	A / G	-0.048	0.0073	3.597e-11	PKD2L1	SCD
690.618	CE(20:4)_[M+NH4]1+	Sterol lipids (ST)	Sterols	Cholesteryl esters (CE)	rs520987	chr11:61521446	A / C	0.0467	0.007	2.04e-11	C11orf9	FADS1-FADS2-FADS3
303.233	FA(20:4)_[M-H]1-	Fatty acyls (FA)	Fatty acids and conjugates	Free fatty acids (FA)	rs174530	chr11:61546592	G / A	-0.0971	0.0076	1.475e-37	C11orf9	FADS1-FADS2-FADS3
329.249	FA(22:5)_[M-H]1-	Fatty acyls (FA)	Fatty acids and conjugates	Free fatty acids (FA)	rs174530	chr11:61546592	G / A	-0.0659	0.01	3.78e-11	C11orf9	FADS1-FADS2-FADS3
331.264	FA(22:4)_[M-H]1-	Fatty acyls (FA)	Fatty acids and conjugates	Free fatty acids (FA)	rs174530	chr11:61546592	G / A	-0.0891	0.0103	3.843e-18	C11orf9	FADS1-FADS2-FADS3
544.34	LPC(20:4)_[M+H]1+	Glycerophospholipids (GP)	Glycerophosphocholines	Lysophosphatidylcholines (LPC)	rs174530	chr11:61546592	G / A	-0.118	0.01	7.215e-32	C11orf9	FADS1-FADS2-FADS3
642.618	CE(16:0)_[M+NH4]1+	Sterol lipids (ST)	Sterols	Cholesteryl esters (CE)	rs174530	chr11:61546592	G / A	-0.0343	0.0055	3.21e-10	C11orf9	FADS1-FADS2-FADS3
664.603	CE(18:3)_[M+NH4]1+	Sterol lipids (ST)	Sterols	Cholesteryl esters (CE)	rs174530	chr11:61546592	G / A	-0.0594	0.0079	7.666e-14	C11orf9	FADS1-FADS2-FADS3
671.466	PA(34:2)_[M-H]1-	Glycerophospholipids (GP)	Glycerophosphates	Phosphatidates (PA)	rs174530	chr11:61546592	G / A	0.062	0.0099	3.128e-10	C11orf9	FADS1-FADS2-FADS3
688.603	CE(20:5)_[M+NH4]1+	Sterol lipids (ST)	Sterols	Cholesteryl esters (CE)	rs174530	chr11:61546592	G / A	-0.1726	0.0136	1.196e-36	C11orf9	FADS1-FADS2-FADS3
690.618	CE(20:4)_[M+NH4]1+	Sterol lipids (ST)	Sterols	Cholesteryl esters (CE)	rs174530	chr11:61546592	G / A	-0.1717	0.0084	2.4e-93	C11orf9	FADS1-FADS2-FADS3
716.523	PE(34:2)_[M+H]1+	Glycerophospholipids (GP)	Glycerophosphoethanolamines	Phosphatidylethanolamines (PE)	rs174530	chr11:61546592	G / A	0.1151	0.0114	4.158e-24	C11orf9	FADS1-FADS2-FADS3
734.57	PC(32:0)_[M+H]1+ / PE(35:0)_[M+H]1+ / PA(37:1)_[M+NH4]1+	Glycerophospholipids (GP)	Glycerophosphocholines	Phosphatidylcholines (PC)	rs174530	chr11:61546592	G / A	-0.0428	0.0051	7.46e-17	C11orf9	FADS1-FADS2-FADS3
742.539	PC(33:3)_[M+H]1+ / PE(36:3)_[M+H]1+ / PA(38:4)_[M+NH4]1+	Glycerophospholipids (GP)	Glycerophosphocholines	Phosphatidylcholines (PC)	rs174530	chr11:61546592	G / A	0.1109	0.0115	4.96e-22	C11orf9	FADS1-FADS2-FADS3
744.554	PC(33:2)_[M+H]1+ / PE(36:2)_[M+H]1+ / PA(38:3)_[M+NH4]1+	Glycerophospholipids (GP)	Glycerophosphocholines	Phosphatidylcholines (PC)	rs174530	chr11:61546592	G / A	0.0685	0.0062	2.019e-28	C11orf9	FADS1-FADS2-FADS3
745.575	PA(39:1)_[M+H]1+	Glycerophospholipids (GP)	Glycerophosphates	Phosphatidates (PA)	rs174530	chr11:61546592	G / A	0.0604	0.0059	7.033e-25	C11orf9	FADS1-FADS2-FADS3
749.534	PG(34:0)_[M-H]1-	Glycerophospholipids (GP)	Glycerophosphoglycerols	Phosphatidylglycerols (PG)	rs174530	chr11:61546592	G / A	-0.0555	0.0074	7.151e-14	C11orf9	FADS1-FADS2-FADS3
750.544	PE-O(38:6)_[M+H]1+ / PC-P(35:5)_[M+H]1+	Glycerophospholipids (GP)	Glycerophosphoethanolamines	Phosphatidylethanolamines (PE)	rs174530	chr11:61546592	G / A	-0.066	0.0081	4.161e-16	C11orf9	FADS1-FADS2-FADS3
752.559	PE-O(38:4)_[M-H]1- / PC-O(35:4)_[M-H]1- / PC-P(35:3)_[M-H]1-	Glycerophospholipids (GP)	Glycerophosphoethanolamines	Phosphatidylethanolamines (PE)	rs174530	chr11:61546592	G / A	-0.088	0.0088	2.425e-23	C11orf9	FADS1-FADS2-FADS3
757.502	PG(35:3)_[M-H]1-	Glycerophospholipids (GP)	Glycerophosphoglycerols	Phosphatidylglycerols (PG)	rs174530	chr11:61546592	G / A	0.0532	0.0077	6.062e-12	C11orf9	FADS1-FADS2-FADS3
758.57	PC(34:2)_[M+H]1+ / PE(37:2)_[M+H]1+ / PA(39:3)_[M+NH4]1+	Glycerophospholipids (GP)	Glycerophosphocholines	Phosphatidylcholines (PC)	rs174530	chr11:61546592	G / A	0.0387	0.0043	8.929e-20	C11orf9	FADS1-FADS2-FADS3
764.524	PE(38:5)_[M-H]1-	Glycerophospholipids (GP)	Glycerophosphoethanolamines	Phosphatidylethanolamines (PE)	rs174530	chr11:61546592	G / A	-0.0828	0.0093	6.407e-19	C11orf9	FADS1-FADS2-FADS3
766.574	PC-O(36:5)_[M+H]1+ / PC-P(36:4)_[M+H]1+	Glycerophospholipids (GP)	Glycerophosphocholines	Phosphatidylcholines (PC)	rs174530	chr11:61546592	G / A	-0.1118	0.0064	1.442e-67	C11orf9	FADS1-FADS2-FADS3
768.554	PC(35:4)_[M+H]1+ / PE(38:4)_[M+H]1+ / PA(40:5)_[M+NH4]1+	Glycerophospholipids (GP)	Glycerophosphocholines	Phosphatidylcholines (PC)	rs174530	chr11:61546592	G / A	-0.0887	0.0068	3.736e-39	C11orf9	FADS1-FADS2-FADS3
770.57	PC(35:3)_[M+H]1+ / PE(38:3)_[M+H]1+ / PA(40:4)_[M+NH4]1+	Glycerophospholipids (GP)	Glycerophosphocholines	Phosphatidylcholines (PC)	rs174530	chr11:61546592	G / A	0.0678	0.0074	8.263e-20	C11orf9	FADS1-FADS2-FADS3
770.606	PC-O(36:3)_M+H]1+ / PC-P(36:2)_M+H]1+	Glycerophospholipids (GP)	Glycerophosphocholines	Phosphatidylcholines (PC)	rs174530	chr11:61546592	G / A	0.076	0.0073	4.842e-25	C11orf9	FADS1-FADS2-FADS3
771.59	PA(41:2)_[M+H]1+	Glycerophospholipids (GP)	Glycerophosphates	Phosphatidates (PA)	rs174530	chr11:61546592	G / A	0.0804	0.0102	3.952e-15	C11orf9	FADS1-FADS2-FADS3
777.565	PG(36:0)_[M-H]1-	Glycerophospholipids (GP)	Glycerophosphoglycerols	Phosphatidylglycerols (PG)	rs174530	chr11:61546592	G / A	-0.0481	0.0062	6.076e-15	C11orf9	FADS1-FADS2-FADS3
784.586	PC(36:3)_[M+H]1+ / PE(39:3)_[M+H]1+ / PA(41:4)_[M+NH4]1+	Glycerophospholipids (GP)	Glycerophosphocholines	Phosphatidylcholines (PC)	rs174530	chr11:61546592	G / A	0.0649	0.0041	1.407e-57	C11orf9	FADS1-FADS2-FADS3
786.601	PC(36:2)_[M+H]1+ / PE(39:2)_[M+H]1+ / PA(41:3)_[M+NH4]1+	Glycerophospholipids (GP)	Glycerophosphocholines	Phosphatidylcholines (PC)	rs174530	chr11:61546592	G / A	0.0288	0.0042	3.931e-12	C11orf9	FADS1-FADS2-FADS3
789.544	PA(43:6)_[M-H]1-	Glycerophospholipids (GP)	Glycerophosphates	Phosphatidates (PA)	rs174530	chr11:61546592	G / A	0.05	0.0079	2.826e-10	C11orf9	FADS1-FADS2-FADS3
793.575	PA(43:4)_[M-H]1-	Glycerophospholipids (GP)	Glycerophosphates	Phosphatidates (PA)	rs174530	chr11:61546592	G / A	-0.0785	0.0072	1.277e-27	C11orf9	FADS1-FADS2-FADS3
794.606	PC-O(38:5)_[M+H]1+ / PC-P(38:4)_[M+H]1+	Glycerophospholipids (GP)	Glycerophosphocholines	Phosphatidylcholines (PC)	rs174530	chr11:61546592	G / A	-0.0808	0.0064	6.654e-37	C11orf9	FADS1-FADS2-FADS3
796.586	PC(37:4)_[M+H]1+ / PE(40:4)_[M+H]1+ / PA(42:5)_[M+NH4]1+	Glycerophospholipids (GP)	Glycerophosphocholines	Phosphatidylcholines (PC)	rs174530	chr11:61546592	G / A	-0.1312	0.0092	1.09e-45	C11orf9	FADS1-FADS2-FADS3
798.601	PC(37:4)_[M+H]1+ / PE(40:3)_[M+H]1+	Glycerophospholipids (GP)	Glycerophosphocholines	Phosphatidylcholines (PC)	rs174530	chr11:61546592	G / A	0.0616	0.008	1.069e-14	C11orf9	FADS1-FADS2-FADS3
808.585	PC(38:5)_[M+H]1+ / PE(41:5)_[M+H]1+ / PA(43:6)_[M+NH4]1+	Glycerophospholipids (GP)	Glycerophosphocholines	Phosphatidylcholines (PC)	rs174530	chr11:61546592	G / A	-0.07	0.0054	2.111e-38	C11orf9	FADS1-FADS2-FADS3
810.601	PC(38:4)_[M+H]1+ / PE(41:4)_[M+H]1+	Glycerophospholipids (GP)	Glycerophosphocholines	Phosphatidylcholines (PC)	rs174530	chr11:61546592	G / A	-0.129	0.0062	7.51e-97	C11orf9	FADS1-FADS2-FADS3
812.617	PC(38:3)_[M+H]1+ / PE(41:3)_[M+H]1+ / PA(43:4)_[M+NH4]1+	Glycerophospholipids (GP)	Glycerophosphocholines	Phosphatidylcholines (PC)	rs174530	chr11:61546592	G / A	0.0548	0.0063	5.705e-18	C11orf9	FADS1-FADS2-FADS3
820.621	PC-O(40:6)_[M+H]1+ / PC-P(40:5)_[M+H]1+	Glycerophospholipids (GP)	Glycerophosphocholines	Phosphatidylcholines (PC)	rs174530	chr11:61546592	G / A	-0.0523	0.0067	5.164e-15	C11orf9	FADS1-FADS2-FADS3
822.637	PC-O(40:5)_[M+H]1+ / PC-P(40:4)_[M+H]1+	Glycerophospholipids (GP)	Glycerophosphocholines	Phosphatidylcholines (PC)	rs174530	chr11:61546592	G / A	-0.0683	0.0071	5.377e-22	C11orf9	FADS1-FADS2-FADS3
825.592	SM(44:9)_[M+H]1-	Sphingolipids (SP)	Phosphosphingolipids	Sphingomyelins (SM)	rs174530	chr11:61546592	G / A	-0.1326	0.0079	1.854e-62	C11orf9	FADS1-FADS2-FADS3
833.519	PI(34:2)_[M-H]1-	Glycerophospholipids (GP)	Glycerophosphoinositols	Phosphatidylinositols (PI)	rs174530	chr11:61546592	G / A	0.0585	0.0085	5.359e-12	C11orf9	FADS1-FADS2-FADS3
834.601	PC(40:6)_[M+H]1+ / PE(43:6)_[M+H]1+	Glycerophospholipids (GP)	Glycerophosphocholines	Phosphatidylcholines (PC)	rs174530	chr11:61546592	G / A	-0.067	0.008	5.735e-17	C11orf9	FADS1-FADS2-FADS3
836.616	PC(40:5)_[M+H]1+	Glycerophospholipids (GP)	Glycerophosphocholines	Phosphatidylcholines (PC)	rs174530	chr11:61546592	G / A	-0.0934	0.0072	6.562e-39	C11orf9	FADS1-FADS2-FADS3
838.56	PC(36:5)_[M+OAc]1- / PS(40:4)_[M-H]1-	Glycerophospholipids (GP)	Glycerophosphocholines	Phosphatidylcholines (PC)	rs174530	chr11:61546592	G / A	-0.122	0.0126	3.945e-22	C11orf9	FADS1-FADS2-FADS3
842.592	PC(36:3)_[M+OAc]1- / PS(40:2)_[M-H]1-	Glycerophospholipids (GP)	Glycerophosphocholines	Phosphatidylcholines (PC)	rs174530	chr11:61546592	G / A	0.0769	0.0062	2.253e-35	C11orf9	FADS1-FADS2-FADS3
851.602	PI-O(36:0)_[M-H]1- / PG(37:0)_[M+OAc]1-	Glycerophospholipids (GP)	Glycerophosphoinositols	Phosphatidylinositols (PI)	rs174530	chr11:61546592	G / A	-0.0715	0.0082	3.751e-18	C11orf9	FADS1-FADS2-FADS3
857.519	PI(36:4)_[M-H]1-	Glycerophospholipids (GP)	Glycerophosphoinositols	Phosphatidylinositols (PI)	rs174530	chr11:61546592	G / A	-0.0559	0.0083	1.87e-11	C11orf9	FADS1-FADS2-FADS3
861.55	PI(36:2)_[M-H]1-	Glycerophospholipids (GP)	Glycerophosphoinositols	Phosphatidylinositols (PI)	rs174530	chr11:61546592	G / A	0.0608	0.0073	5.327e-17	C11orf9	FADS1-FADS2-FADS3
868.607	PC(38:4)_[M+OAc]1- / PS(42:3)_[M-H]1-	Glycerophospholipids (GP)	Glycerophosphocholines	Phosphatidylcholines (PC)	rs174530	chr11:61546592	G / A	-0.1246	0.0075	2.381e-61	C11orf9	FADS1-FADS2-FADS3
870.623	PC(38:3)_[M+OAc]1- / PS(42:2)_[M-H]1-	Glycerophospholipids (GP)	Glycerophosphocholines	Phosphatidylcholines (PC)	rs174530	chr11:61546592	G / A	0.073	0.0083	1.235e-18	C11orf9	FADS1-FADS2-FADS3
878.592	PC(39:6)_[M+OAc]1- / PS(43:5)_[M-H]1-	Glycerophospholipids (GP)	Glycerophosphocholines	Phosphatidylcholines (PC)	rs174530	chr11:61546592	G / A	-0.064	0.0102	3.219e-10	C11orf9	FADS1-FADS2-FADS3
885.55	PI(38:4)_[M-H]1-	Glycerophospholipids (GP)	Glycerophosphoinositols	Phosphatidylinositols (PI)	rs174530	chr11:61546592	G / A	-0.0642	0.0065	2.748e-23	C11orf9	FADS1-FADS2-FADS3
894.623	PC(40:5)_[M+OAc]1- / PS(44:4)_[M-H]1-	Glycerophospholipids (GP)	Glycerophosphocholines	Phosphatidylcholines (PC)	rs174530	chr11:61546592	G / A	-0.0837	0.0079	3.387e-26	C11orf9	FADS1-FADS2-FADS3
896.639	PC(40:4)_[M+OAc]1- / PS(44:3)_[M-H]1-	Glycerophospholipids (GP)	Glycerophosphocholines	Phosphatidylcholines (PC)	rs174530	chr11:61546592	G / A	-0.0828	0.0099	7.05e-17	C11orf9	FADS1-FADS2-FADS3
920.566	PS(42:7)_[M+OAc]1-	Glycerophospholipids (GP)	Glycerophosphoserines	Phosphatidylserines (PS)	rs174530	chr11:61546592	G / A	-0.1591	0.0209	2.397e-14	C11orf9	FADS1-FADS2-FADS3
922.785	TG(56:7)_[M+NH4]1+	Glycerolipids (GL)	Triradylglycerols	Triacylglycerols (TG)	rs174530	chr11:61546592	G / A	-0.0754	0.0112	1.818e-11	C11orf9	FADS1-FADS2-FADS3
923.587	PI(36:1)_[M+OAc]1-	Glycerophospholipids (GP)	Glycerophosphoinositols	Phosphatidylinositols (PI)	rs174530	chr11:61546592	G / A	-0.1192	0.0103	5.915e-31	C11orf9	FADS1-FADS2-FADS3
924.597	PS(42:5)_[M+OAc]1-	Glycerophospholipids (GP)	Glycerophosphoserines	Phosphatidylserines (PS)	rs174530	chr11:61546592	G / A	0.0759	0.0092	1.982e-16	C11orf9	FADS1-FADS2-FADS3
924.67	PC(42:4)_[M+OAc]1-	Glycerophospholipids (GP)	Glycerophosphocholines	Phosphatidylcholines (PC)	rs174530	chr11:61546592	G / A	-0.1114	0.0106	6.535e-26	C11orf9	FADS1-FADS2-FADS3
924.801	TG(56:6)_[M+NH4]1+	Glycerolipids (GL)	Triradylglycerols	Triacylglycerols (TG)	rs174530	chr11:61546592	G / A	-0.0752	0.0091	1.674e-16	C11orf9	FADS1-FADS2-FADS3
925.602	PI(36:0)_[M+OAc]1-	Glycerophospholipids (GP)	Glycerophosphoinositols	Phosphatidylinositols (PI)	rs174530	chr11:61546592	G / A	0.0726	0.0099	1.842e-13	C11orf9	FADS1-FADS2-FADS3
928.833	TG(56:4)_[M+NH4]1+	Glycerolipids (GL)	Triradylglycerols	Triacylglycerols (TG)	rs174530	chr11:61546592	G / A	0.0744	0.0119	3.611e-10	C11orf9	FADS1-FADS2-FADS3
946.785	TG(58:9)_[M+NH4]1+	Glycerolipids (GL)	Triradylglycerols	Triacylglycerols (TG)	rs174530	chr11:61546592	G / A	-0.1591	0.0212	5.583e-14	C11orf9	FADS1-FADS2-FADS3
950.613	PS(44:6)_[M+OAc]1-	Glycerophospholipids (GP)	Glycerophosphoserines	Phosphatidylserines (PS)	rs174530	chr11:61546592	G / A	-0.1296	0.011	9.012e-32	C11orf9	FADS1-FADS2-FADS3
305.249	FA(20:3)_[M-H]1-	Fatty acyls (FA)	Fatty acids and conjugates	Free fatty acids (FA)	rs7943728	chr11:61547068	A / G	0.0871	0.0121	6.735e-13	C11orf9	FADS1-FADS2-FADS3
690.618	CE(20:4)_[M+NH4]1+	Sterol lipids (ST)	Sterols	Cholesteryl esters (CE)	rs7943728	chr11:61547068	A / G	-0.1178	0.0129	7.575e-20	C11orf9	FADS1-FADS2-FADS3
782.57	PC(36:4)_[M+H]1+ / PE(39:4)_[M+H]1+ / PA(41:5)_[M+NH4]1+	Glycerophospholipids (GP)	Glycerophosphocholines	Phosphatidylcholines (PC)	rs7943728	chr11:61547068	A / G	-0.0817	0.0076	1.099e-26	C11orf9	FADS1-FADS2-FADS3
784.586	PC(36:3)_[M+H]1+ / PE(39:3)_[M+H]1+ / PA(41:4)_[M+NH4]1+	Glycerophospholipids (GP)	Glycerophosphocholines	Phosphatidylcholines (PC)	rs7943728	chr11:61547068	A / G	0.0695	0.0063	1.412e-28	C11orf9	FADS1-FADS2-FADS3
794.606	PC-O(38:5)_[M+H]1+ / PC-P(38:4)_[M+H]1+	Glycerophospholipids (GP)	Glycerophosphocholines	Phosphatidylcholines (PC)	rs7943728	chr11:61547068	A / G	-0.0659	0.0099	2.713e-11	C11orf9	FADS1-FADS2-FADS3
796.586	PC(37:4)_[M+H]1+ / PE(40:4)_[M+H]1+ / PA(42:5)_[M+NH4]1+	Glycerophospholipids (GP)	Glycerophosphocholines	Phosphatidylcholines (PC)	rs7943728	chr11:61547068	A / G	-0.0899	0.0143	3.392e-10	C11orf9	FADS1-FADS2-FADS3
798.601	PC(37:4)_[M+H]1+ / PE(40:3)_[M+H]1+	Glycerophospholipids (GP)	Glycerophosphocholines	Phosphatidylcholines (PC)	rs7943728	chr11:61547068	A / G	0.0909	0.0123	1.708e-13	C11orf9	FADS1-FADS2-FADS3
810.601	PC(38:4)_[M+H]1+ / PE(41:4)_[M+H]1+	Glycerophospholipids (GP)	Glycerophosphocholines	Phosphatidylcholines (PC)	rs7943728	chr11:61547068	A / G	-0.089	0.0096	1.355e-20	C11orf9	FADS1-FADS2-FADS3
812.617	PC(38:3)_[M+H]1+ / PE(41:3)_[M+H]1+ / PA(43:4)_[M+NH4]1+	Glycerophospholipids (GP)	Glycerophosphocholines	Phosphatidylcholines (PC)	rs7943728	chr11:61547068	A / G	0.0881	0.0098	2.479e-19	C11orf9	FADS1-FADS2-FADS3
814.632	PC(38:2)_[M+H]1+ / PE(41:2)_[M+H]1+	Glycerophospholipids (GP)	Glycerophosphocholines	Phosphatidylcholines (PC)	rs7943728	chr11:61547068	A / G	0.0752	0.0108	3.921e-12	C11orf9	FADS1-FADS2-FADS3
842.592	PC(36:3)_[M+OAc]1- / PS(40:2)_[M-H]1-	Glycerophospholipids (GP)	Glycerophosphocholines	Phosphatidylcholines (PC)	rs7943728	chr11:61547068	A / G	0.0811	0.0096	2.138e-17	C11orf9	FADS1-FADS2-FADS3
859.534	PI(36:3)_[M-H]1-	Glycerophospholipids (GP)	Glycerophosphoinositols	Phosphatidylinositols (PI)	rs7943728	chr11:61547068	A / G	0.0882	0.0136	7.442e-11	C11orf9	FADS1-FADS2-FADS3
868.607	PC(38:4)_[M+OAc]1- / PS(42:3)_[M-H]1-	Glycerophospholipids (GP)	Glycerophosphocholines	Phosphatidylcholines (PC)	rs7943728	chr11:61547068	A / G	-0.0836	0.0116	5.599e-13	C11orf9	FADS1-FADS2-FADS3
870.623	PC(38:3)_[M+OAc]1- / PS(42:2)_[M-H]1-	Glycerophospholipids (GP)	Glycerophosphocholines	Phosphatidylcholines (PC)	rs7943728	chr11:61547068	A / G	0.1059	0.0127	9.255e-17	C11orf9	FADS1-FADS2-FADS3
690.618	CE(20:4)_[M+NH4]1+	Sterol lipids (ST)	Sterols	Cholesteryl esters (CE)	rs72920160	chr11:61547951	T / C	-0.1653	0.0252	5.429e-11	C11orf9	FADS1-FADS2-FADS3
303.233	FA(20:4)_[M-H]1-	Fatty acyls (FA)	Fatty acids and conjugates	Free fatty acids (FA)	rs509360	chr11:61548559	G / A	-0.0606	0.0066	3.493e-20	C11orf9	FADS1-FADS2-FADS3
331.264	FA(22:4)_[M-H]1-	Fatty acyls (FA)	Fatty acids and conjugates	Free fatty acids (FA)	rs509360	chr11:61548559	G / A	-0.0589	0.0088	2.508e-11	C11orf9	FADS1-FADS2-FADS3
544.34	LPC(20:4)_[M+H]1+	Glycerophospholipids (GP)	Glycerophosphocholines	Lysophosphatidylcholines (LPC)	rs509360	chr11:61548559	G / A	-0.0829	0.0087	1.466e-21	C11orf9	FADS1-FADS2-FADS3
688.603	CE(20:5)_[M+NH4]1+	Sterol lipids (ST)	Sterols	Cholesteryl esters (CE)	rs509360	chr11:61548559	G / A	-0.12	0.0118	2.061e-24	C11orf9	FADS1-FADS2-FADS3
690.618	CE(20:4)_[M+NH4]1+	Sterol lipids (ST)	Sterols	Cholesteryl esters (CE)	rs509360	chr11:61548559	G / A	-0.119	0.0072	7.784e-61	C11orf9	FADS1-FADS2-FADS3
716.523	PE(34:2)_[M+H]1+	Glycerophospholipids (GP)	Glycerophosphoethanolamines	Phosphatidylethanolamines (PE)	rs509360	chr11:61548559	G / A	0.0918	0.0098	9.113e-21	C11orf9	FADS1-FADS2-FADS3
734.57	PC(32:0)_[M+H]1+ / PE(35:0)_[M+H]1+ / PA(37:1)_[M+NH4]1+	Glycerophospholipids (GP)	Glycerophosphocholines	Phosphatidylcholines (PC)	rs509360	chr11:61548559	G / A	-0.0284	0.0044	1.761e-10	C11orf9	FADS1-FADS2-FADS3
742.539	PC(33:3)_[M+H]1+ / PE(36:3)_[M+H]1+ / PA(38:4)_[M+NH4]1+	Glycerophospholipids (GP)	Glycerophosphocholines	Phosphatidylcholines (PC)	rs509360	chr11:61548559	G / A	0.0819	0.0099	1.829e-16	C11orf9	FADS1-FADS2-FADS3
744.554	PC(33:2)_[M+H]1+ / PE(36:2)_[M+H]1+ / PA(38:3)_[M+NH4]1+	Glycerophospholipids (GP)	Glycerophosphocholines	Phosphatidylcholines (PC)	rs509360	chr11:61548559	G / A	0.0495	0.0053	1.686e-20	C11orf9	FADS1-FADS2-FADS3
745.575	PA(39:1)_[M+H]1+	Glycerophospholipids (GP)	Glycerophosphates	Phosphatidates (PA)	rs509360	chr11:61548559	G / A	0.0426	0.0051	4.316e-17	C11orf9	FADS1-FADS2-FADS3
750.544	PE-O(38:6)_[M+H]1+ / PC-P(35:5)_[M+H]1+	Glycerophospholipids (GP)	Glycerophosphoethanolamines	Phosphatidylethanolamines (PE)	rs509360	chr11:61548559	G / A	-0.0473	0.007	1.374e-11	C11orf9	FADS1-FADS2-FADS3
752.559	PE-O(38:4)_[M-H]1- / PC-O(35:4)_[M-H]1- / PC-P(35:3)_[M-H]1-	Glycerophospholipids (GP)	Glycerophosphoethanolamines	Phosphatidylethanolamines (PE)	rs509360	chr11:61548559	G / A	-0.0607	0.0076	1.627e-15	C11orf9	FADS1-FADS2-FADS3
758.57	PC(34:2)_[M+H]1+ / PE(37:2)_[M+H]1+ / PA(39:3)_[M+NH4]1+	Glycerophospholipids (GP)	Glycerophosphocholines	Phosphatidylcholines (PC)	rs509360	chr11:61548559	G / A	0.0243	0.0037	3.498e-11	C11orf9	FADS1-FADS2-FADS3
764.524	PE(38:5)_[M-H]1-	Glycerophospholipids (GP)	Glycerophosphoethanolamines	Phosphatidylethanolamines (PE)	rs509360	chr11:61548559	G / A	-0.0507	0.008	2.579e-10	C11orf9	FADS1-FADS2-FADS3
766.574	PC-O(36:5)_[M+H]1+ / PC-P(36:4)_[M+H]1+	Glycerophospholipids (GP)	Glycerophosphocholines	Phosphatidylcholines (PC)	rs509360	chr11:61548559	G / A	-0.0778	0.0056	6.616e-44	C11orf9	FADS1-FADS2-FADS3
768.554	PC(35:4)_[M+H]1+ / PE(38:4)_[M+H]1+ / PA(40:5)_[M+NH4]1+	Glycerophospholipids (GP)	Glycerophosphocholines	Phosphatidylcholines (PC)	rs509360	chr11:61548559	G / A	-0.054	0.0058	2.06e-20	C11orf9	FADS1-FADS2-FADS3
768.591	PC-O(36:4)_[M+H]1+ / PC-P(36:3)_[M+H]1+	Glycerophospholipids (GP)	Glycerophosphocholines	Phosphatidylcholines (PC)	rs509360	chr11:61548559	G / A	-0.0447	0.0056	2.327e-15	C11orf9	FADS1-FADS2-FADS3
770.57	PC(35:3)_[M+H]1+ / PE(38:3)_[M+H]1+ / PA(40:4)_[M+NH4]1+	Glycerophospholipids (GP)	Glycerophosphocholines	Phosphatidylcholines (PC)	rs509360	chr11:61548559	G / A	0.0495	0.0064	1.181e-14	C11orf9	FADS1-FADS2-FADS3
770.606	PC-O(36:3)_M+H]1+ / PC-P(36:2)_M+H]1+	Glycerophospholipids (GP)	Glycerophosphocholines	Phosphatidylcholines (PC)	rs509360	chr11:61548559	G / A	0.0487	0.0063	1.298e-14	C11orf9	FADS1-FADS2-FADS3
782.57	PC(36:4)_[M+H]1+ / PE(39:4)_[M+H]1+ / PA(41:5)_[M+NH4]1+	Glycerophospholipids (GP)	Glycerophosphocholines	Phosphatidylcholines (PC)	rs509360	chr11:61548559	G / A	-0.0748	0.0042	4.402e-70	C11orf9	FADS1-FADS2-FADS3
784.586	PC(36:3)_[M+H]1+ / PE(39:3)_[M+H]1+ / PA(41:4)_[M+NH4]1+	Glycerophospholipids (GP)	Glycerophosphocholines	Phosphatidylcholines (PC)	rs509360	chr11:61548559	G / A	0.0434	0.0035	1.152e-35	C11orf9	FADS1-FADS2-FADS3
793.575	PA(43:4)_[M-H]1-	Glycerophospholipids (GP)	Glycerophosphates	Phosphatidates (PA)	rs509360	chr11:61548559	G / A	-0.0504	0.0062	7.294e-16	C11orf9	FADS1-FADS2-FADS3
794.606	PC-O(38:5)_[M+H]1+ / PC-P(38:4)_[M+H]1+	Glycerophospholipids (GP)	Glycerophosphocholines	Phosphatidylcholines (PC)	rs509360	chr11:61548559	G / A	-0.0587	0.0055	7.739e-27	C11orf9	FADS1-FADS2-FADS3
796.586	PC(37:4)_[M+H]1+ / PE(40:4)_[M+H]1+ / PA(42:5)_[M+NH4]1+	Glycerophospholipids (GP)	Glycerophosphocholines	Phosphatidylcholines (PC)	rs509360	chr11:61548559	G / A	-0.0924	0.008	5.097e-31	C11orf9	FADS1-FADS2-FADS3
798.601	PC(37:4)_[M+H]1+ / PE(40:3)_[M+H]1+	Glycerophospholipids (GP)	Glycerophosphocholines	Phosphatidylcholines (PC)	rs509360	chr11:61548559	G / A	0.0431	0.0069	3.816e-10	C11orf9	FADS1-FADS2-FADS3
808.585	PC(38:5)_[M+H]1+ / PE(41:5)_[M+H]1+ / PA(43:6)_[M+NH4]1+	Glycerophospholipids (GP)	Glycerophosphocholines	Phosphatidylcholines (PC)	rs509360	chr11:61548559	G / A	-0.0527	0.0046	4.504e-30	C11orf9	FADS1-FADS2-FADS3
810.601	PC(38:4)_[M+H]1+ / PE(41:4)_[M+H]1+	Glycerophospholipids (GP)	Glycerophosphocholines	Phosphatidylcholines (PC)	rs509360	chr11:61548559	G / A	-0.0908	0.0053	4.216e-65	C11orf9	FADS1-FADS2-FADS3
812.617	PC(38:3)_[M+H]1+ / PE(41:3)_[M+H]1+ / PA(43:4)_[M+NH4]1+	Glycerophospholipids (GP)	Glycerophosphocholines	Phosphatidylcholines (PC)	rs509360	chr11:61548559	G / A	0.0386	0.0055	1.718e-12	C11orf9	FADS1-FADS2-FADS3
820.621	PC-O(40:6)_[M+H]1+ / PC-P(40:5)_[M+H]1+	Glycerophospholipids (GP)	Glycerophosphocholines	Phosphatidylcholines (PC)	rs509360	chr11:61548559	G / A	-0.0425	0.0057	1.343e-13	C11orf9	FADS1-FADS2-FADS3
822.637	PC-O(40:5)_[M+H]1+ / PC-P(40:4)_[M+H]1+	Glycerophospholipids (GP)	Glycerophosphocholines	Phosphatidylcholines (PC)	rs509360	chr11:61548559	G / A	-0.0493	0.0061	8.71e-16	C11orf9	FADS1-FADS2-FADS3
825.592	SM(44:9)_[M+H]1-	Sphingolipids (SP)	Phosphosphingolipids	Sphingomyelins (SM)	rs509360	chr11:61548559	G / A	-0.0893	0.0068	5.604e-39	C11orf9	FADS1-FADS2-FADS3
830.569	PC(40:8)_[M+H]1+	Glycerophospholipids (GP)	Glycerophosphocholines	Phosphatidylcholines (PC)	rs509360	chr11:61548559	G / A	-0.0704	0.008	1.109e-18	C11orf9	FADS1-FADS2-FADS3
836.616	PC(40:5)_[M+H]1+	Glycerophospholipids (GP)	Glycerophosphocholines	Phosphatidylcholines (PC)	rs509360	chr11:61548559	G / A	-0.0636	0.0062	9.007e-25	C11orf9	FADS1-FADS2-FADS3
838.56	PC(36:5)_[M+OAc]1- / PS(40:4)_[M-H]1-	Glycerophospholipids (GP)	Glycerophosphocholines	Phosphatidylcholines (PC)	rs509360	chr11:61548559	G / A	-0.0793	0.0109	2.727e-13	C11orf9	FADS1-FADS2-FADS3
842.592	PC(36:3)_[M+OAc]1- / PS(40:2)_[M-H]1-	Glycerophospholipids (GP)	Glycerophosphocholines	Phosphatidylcholines (PC)	rs509360	chr11:61548559	G / A	0.054	0.0053	3.829e-24	C11orf9	FADS1-FADS2-FADS3
851.602	PI-O(36:0)_[M-H]1- / PG(37:0)_[M+OAc]1-	Glycerophospholipids (GP)	Glycerophosphoinositols	Phosphatidylinositols (PI)	rs509360	chr11:61548559	G / A	-0.0511	0.0071	5.821e-13	C11orf9	FADS1-FADS2-FADS3
859.534	PI(36:3)_[M-H]1-	Glycerophospholipids (GP)	Glycerophosphoinositols	Phosphatidylinositols (PI)	rs509360	chr11:61548559	G / A	0.0728	0.0075	3.681e-22	C11orf9	FADS1-FADS2-FADS3
868.607	PC(38:4)_[M+OAc]1- / PS(42:3)_[M-H]1-	Glycerophospholipids (GP)	Glycerophosphocholines	Phosphatidylcholines (PC)	rs509360	chr11:61548559	G / A	-0.0854	0.0065	1.298e-39	C11orf9	FADS1-FADS2-FADS3
870.623	PC(38:3)_[M+OAc]1- / PS(42:2)_[M-H]1-	Glycerophospholipids (GP)	Glycerophosphocholines	Phosphatidylcholines (PC)	rs509360	chr11:61548559	G / A	0.0542	0.0071	2.565e-14	C11orf9	FADS1-FADS2-FADS3
885.55	PI(38:4)_[M-H]1-	Glycerophospholipids (GP)	Glycerophosphoinositols	Phosphatidylinositols (PI)	rs509360	chr11:61548559	G / A	-0.0459	0.0056	2.43e-16	C11orf9	FADS1-FADS2-FADS3
894.623	PC(40:5)_[M+OAc]1- / PS(44:4)_[M-H]1-	Glycerophospholipids (GP)	Glycerophosphocholines	Phosphatidylcholines (PC)	rs509360	chr11:61548559	G / A	-0.0524	0.0068	1.226e-14	C11orf9	FADS1-FADS2-FADS3
923.587	PI(36:1)_[M+OAc]1-	Glycerophospholipids (GP)	Glycerophosphoinositols	Phosphatidylinositols (PI)	rs509360	chr11:61548559	G / A	-0.0863	0.0089	2.372e-22	C11orf9	FADS1-FADS2-FADS3
924.597	PS(42:5)_[M+OAc]1-	Glycerophospholipids (GP)	Glycerophosphoserines	Phosphatidylserines (PS)	rs509360	chr11:61548559	G / A	0.0494	0.008	5.698e-10	C11orf9	FADS1-FADS2-FADS3
924.67	PC(42:4)_[M+OAc]1-	Glycerophospholipids (GP)	Glycerophosphocholines	Phosphatidylcholines (PC)	rs509360	chr11:61548559	G / A	-0.0711	0.0091	4.517e-15	C11orf9	FADS1-FADS2-FADS3
924.801	TG(56:6)_[M+NH4]1+	Glycerolipids (GL)	Triradylglycerols	Triacylglycerols (TG)	rs509360	chr11:61548559	G / A	-0.0512	0.0079	7.045e-11	C11orf9	FADS1-FADS2-FADS3
946.785	TG(58:9)_[M+NH4]1+	Glycerolipids (GL)	Triradylglycerols	Triacylglycerols (TG)	rs509360	chr11:61548559	G / A	-0.1133	0.0182	4.414e-10	C11orf9	FADS1-FADS2-FADS3
950.613	PS(44:6)_[M+OAc]1-	Glycerophospholipids (GP)	Glycerophosphoserines	Phosphatidylserines (PS)	rs509360	chr11:61548559	G / A	-0.0932	0.0096	1.735e-22	C11orf9	FADS1-FADS2-FADS3
303.233	FA(20:4)_[M-H]1-	Fatty acyls (FA)	Fatty acids and conjugates	Free fatty acids (FA)	rs174533	chr11:61549025	A / G	-0.1018	0.0077	7.663e-40	C11orf9	FADS1-FADS2-FADS3
329.249	FA(22:5)_[M-H]1-	Fatty acyls (FA)	Fatty acids and conjugates	Free fatty acids (FA)	rs174533	chr11:61549025	A / G	-0.072	0.0101	1.119e-12	C11orf9	FADS1-FADS2-FADS3
331.264	FA(22:4)_[M-H]1-	Fatty acyls (FA)	Fatty acids and conjugates	Free fatty acids (FA)	rs174533	chr11:61549025	A / G	-0.094	0.0103	1.009e-19	C11orf9	FADS1-FADS2-FADS3
544.34	LPC(20:4)_[M+H]1+	Glycerophospholipids (GP)	Glycerophosphocholines	Lysophosphatidylcholines (LPC)	rs174533	chr11:61549025	A / G	-0.1246	0.0102	3.184e-34	C11orf9	FADS1-FADS2-FADS3
601.519	DG(36:3)_[M+H-H2O]1+	Glycerolipids (GL)	Diradylglycerols	Diacylglycerols (DG)	rs174533	chr11:61549025	A / G	0.0603	0.0092	5.74e-11	C11orf9	FADS1-FADS2-FADS3
603.535	DG(36:2)_[M+H-H2O]1+	Glycerolipids (GL)	Diradylglycerols	Diacylglycerols (DG)	rs174533	chr11:61549025	A / G	0.0485	0.0078	5.766e-10	C11orf9	FADS1-FADS2-FADS3
642.618	CE(16:0)_[M+NH4]1+	Sterol lipids (ST)	Sterols	Cholesteryl esters (CE)	rs174533	chr11:61549025	A / G	-0.0363	0.0056	7.492e-11	C11orf9	FADS1-FADS2-FADS3
664.603	CE(18:3)_[M+NH4]1+	Sterol lipids (ST)	Sterols	Cholesteryl esters (CE)	rs174533	chr11:61549025	A / G	-0.0653	0.008	3.734e-16	C11orf9	FADS1-FADS2-FADS3
671.466	PA(34:2)_[M-H]1-	Glycerophospholipids (GP)	Glycerophosphates	Phosphatidates (PA)	rs174533	chr11:61549025	A / G	0.0642	0.01	1.208e-10	C11orf9	FADS1-FADS2-FADS3
688.603	CE(20:5)_[M+NH4]1+	Sterol lipids (ST)	Sterols	Cholesteryl esters (CE)	rs174533	chr11:61549025	A / G	-0.1883	0.0138	3.623e-42	C11orf9	FADS1-FADS2-FADS3
690.618	CE(20:4)_[M+NH4]1+	Sterol lipids (ST)	Sterols	Cholesteryl esters (CE)	rs174533	chr11:61549025	A / G	-0.1808	0.0085	7.61e-101	C11orf9	FADS1-FADS2-FADS3
716.523	PE(34:2)_[M+H]1+	Glycerophospholipids (GP)	Glycerophosphoethanolamines	Phosphatidylethanolamines (PE)	rs174533	chr11:61549025	A / G	0.1258	0.0115	5.836e-28	C11orf9	FADS1-FADS2-FADS3
734.57	PC(32:0)_[M+H]1+ / PE(35:0)_[M+H]1+ / PA(37:1)_[M+NH4]1+	Glycerophospholipids (GP)	Glycerophosphocholines	Phosphatidylcholines (PC)	rs174533	chr11:61549025	A / G	-0.0448	0.0052	6.312e-18	C11orf9	FADS1-FADS2-FADS3
742.539	PC(33:3)_[M+H]1+ / PE(36:3)_[M+H]1+ / PA(38:4)_[M+NH4]1+	Glycerophospholipids (GP)	Glycerophosphocholines	Phosphatidylcholines (PC)	rs174533	chr11:61549025	A / G	0.1172	0.0116	5.65e-24	C11orf9	FADS1-FADS2-FADS3
744.554	PC(33:2)_[M+H]1+ / PE(36:2)_[M+H]1+ / PA(38:3)_[M+NH4]1+	Glycerophospholipids (GP)	Glycerophosphocholines	Phosphatidylcholines (PC)	rs174533	chr11:61549025	A / G	0.0717	0.0063	2.848e-30	C11orf9	FADS1-FADS2-FADS3
745.575	PA(39:1)_[M+H]1+	Glycerophospholipids (GP)	Glycerophosphates	Phosphatidates (PA)	rs174533	chr11:61549025	A / G	0.0643	0.0059	1.366e-27	C11orf9	FADS1-FADS2-FADS3
749.534	PG(34:0)_[M-H]1-	Glycerophospholipids (GP)	Glycerophosphoglycerols	Phosphatidylglycerols (PG)	rs174533	chr11:61549025	A / G	-0.0623	0.0075	8.977e-17	C11orf9	FADS1-FADS2-FADS3
750.544	PE-O(38:6)_[M+H]1+ / PC-P(35:5)_[M+H]1+	Glycerophospholipids (GP)	Glycerophosphoethanolamines	Phosphatidylethanolamines (PE)	rs174533	chr11:61549025	A / G	-0.0725	0.0082	6.848e-19	C11orf9	FADS1-FADS2-FADS3
752.559	PE-O(38:4)_[M-H]1- / PC-O(35:4)_[M-H]1- / PC-P(35:3)_[M-H]1-	Glycerophospholipids (GP)	Glycerophosphoethanolamines	Phosphatidylethanolamines (PE)	rs174533	chr11:61549025	A / G	-0.0942	0.0089	5.562e-26	C11orf9	FADS1-FADS2-FADS3
758.57	PC(34:2)_[M+H]1+ / PE(37:2)_[M+H]1+ / PA(39:3)_[M+NH4]1+	Glycerophospholipids (GP)	Glycerophosphocholines	Phosphatidylcholines (PC)	rs174533	chr11:61549025	A / G	0.0395	0.0043	4.926e-20	C11orf9	FADS1-FADS2-FADS3
764.524	PE(38:5)_[M-H]1-	Glycerophospholipids (GP)	Glycerophosphoethanolamines	Phosphatidylethanolamines (PE)	rs174533	chr11:61549025	A / G	-0.09	0.0094	1.213e-21	C11orf9	FADS1-FADS2-FADS3
766.574	PC-O(36:5)_[M+H]1+ / PC-P(36:4)_[M+H]1+	Glycerophospholipids (GP)	Glycerophosphocholines	Phosphatidylcholines (PC)	rs174533	chr11:61549025	A / G	-0.1161	0.0065	4.176e-71	C11orf9	FADS1-FADS2-FADS3
768.554	PC(35:4)_[M+H]1+ / PE(38:4)_[M+H]1+ / PA(40:5)_[M+NH4]1+	Glycerophospholipids (GP)	Glycerophosphocholines	Phosphatidylcholines (PC)	rs174533	chr11:61549025	A / G	-0.091	0.0068	2.432e-40	C11orf9	FADS1-FADS2-FADS3
770.57	PC(35:3)_[M+H]1+ / PE(38:3)_[M+H]1+ / PA(40:4)_[M+NH4]1+	Glycerophospholipids (GP)	Glycerophosphocholines	Phosphatidylcholines (PC)	rs174533	chr11:61549025	A / G	0.068	0.0075	1.542e-19	C11orf9	FADS1-FADS2-FADS3
770.606	PC-O(36:3)_M+H]1+ / PC-P(36:2)_M+H]1+	Glycerophospholipids (GP)	Glycerophosphocholines	Phosphatidylcholines (PC)	rs174533	chr11:61549025	A / G	0.0786	0.0074	4.976e-26	C11orf9	FADS1-FADS2-FADS3
771.59	PA(41:2)_[M+H]1+	Glycerophospholipids (GP)	Glycerophosphates	Phosphatidates (PA)	rs174533	chr11:61549025	A / G	0.082	0.0104	2.317e-15	C11orf9	FADS1-FADS2-FADS3
777.565	PG(36:0)_[M-H]1-	Glycerophospholipids (GP)	Glycerophosphoglycerols	Phosphatidylglycerols (PG)	rs174533	chr11:61549025	A / G	-0.0538	0.0062	5.733e-18	C11orf9	FADS1-FADS2-FADS3
784.586	PC(36:3)_[M+H]1+ / PE(39:3)_[M+H]1+ / PA(41:4)_[M+NH4]1+	Glycerophospholipids (GP)	Glycerophosphocholines	Phosphatidylcholines (PC)	rs174533	chr11:61549025	A / G	0.0659	0.0041	1.215e-58	C11orf9	FADS1-FADS2-FADS3
786.601	PC(36:2)_[M+H]1+ / PE(39:2)_[M+H]1+ / PA(41:3)_[M+NH4]1+	Glycerophospholipids (GP)	Glycerophosphocholines	Phosphatidylcholines (PC)	rs174533	chr11:61549025	A / G	0.0296	0.0042	1.373e-12	C11orf9	FADS1-FADS2-FADS3
793.575	PA(43:4)_[M-H]1-	Glycerophospholipids (GP)	Glycerophosphates	Phosphatidates (PA)	rs174533	chr11:61549025	A / G	-0.0845	0.0073	8.888e-31	C11orf9	FADS1-FADS2-FADS3
794.606	PC-O(38:5)_[M+H]1+ / PC-P(38:4)_[M+H]1+	Glycerophospholipids (GP)	Glycerophosphocholines	Phosphatidylcholines (PC)	rs174533	chr11:61549025	A / G	-0.0841	0.0064	5.399e-39	C11orf9	FADS1-FADS2-FADS3
796.586	PC(37:4)_[M+H]1+ / PE(40:4)_[M+H]1+ / PA(42:5)_[M+NH4]1+	Glycerophospholipids (GP)	Glycerophosphocholines	Phosphatidylcholines (PC)	rs174533	chr11:61549025	A / G	-0.138	0.0093	2.651e-49	C11orf9	FADS1-FADS2-FADS3
798.601	PC(37:4)_[M+H]1+ / PE(40:3)_[M+H]1+	Glycerophospholipids (GP)	Glycerophosphocholines	Phosphatidylcholines (PC)	rs174533	chr11:61549025	A / G	0.0634	0.0081	3.656e-15	C11orf9	FADS1-FADS2-FADS3
808.585	PC(38:5)_[M+H]1+ / PE(41:5)_[M+H]1+ / PA(43:6)_[M+NH4]1+	Glycerophospholipids (GP)	Glycerophosphocholines	Phosphatidylcholines (PC)	rs174533	chr11:61549025	A / G	-0.0752	0.0055	5.11e-43	C11orf9	FADS1-FADS2-FADS3
810.601	PC(38:4)_[M+H]1+ / PE(41:4)_[M+H]1+	Glycerophospholipids (GP)	Glycerophosphocholines	Phosphatidylcholines (PC)	rs174533	chr11:61549025	A / G	-0.135	0.0062	1.55e-103	C11orf9	FADS1-FADS2-FADS3
812.617	PC(38:3)_[M+H]1+ / PE(41:3)_[M+H]1+ / PA(43:4)_[M+NH4]1+	Glycerophospholipids (GP)	Glycerophosphocholines	Phosphatidylcholines (PC)	rs174533	chr11:61549025	A / G	0.0561	0.0064	1.948e-18	C11orf9	FADS1-FADS2-FADS3
820.621	PC-O(40:6)_[M+H]1+ / PC-P(40:5)_[M+H]1+	Glycerophospholipids (GP)	Glycerophosphocholines	Phosphatidylcholines (PC)	rs174533	chr11:61549025	A / G	-0.0554	0.0067	2.332e-16	C11orf9	FADS1-FADS2-FADS3
822.637	PC-O(40:5)_[M+H]1+ / PC-P(40:4)_[M+H]1+	Glycerophospholipids (GP)	Glycerophosphocholines	Phosphatidylcholines (PC)	rs174533	chr11:61549025	A / G	-0.0722	0.0072	6.641e-24	C11orf9	FADS1-FADS2-FADS3
825.592	SM(44:9)_[M+H]1-	Sphingolipids (SP)	Phosphosphingolipids	Sphingomyelins (SM)	rs174533	chr11:61549025	A / G	-0.14	0.008	2.726e-68	C11orf9	FADS1-FADS2-FADS3
832.535	PS(35:2) _[M+OAc]1-	Glycerophospholipids (GP)	Glycerophosphoserines	Phosphatidylserines (PS)	rs174533	chr11:61549025	A / G	-0.1342	0.0212	2.558e-10	C11orf9	FADS1-FADS2-FADS3
833.519	PI(34:2)_[M-H]1-	Glycerophospholipids (GP)	Glycerophosphoinositols	Phosphatidylinositols (PI)	rs174533	chr11:61549025	A / G	0.0602	0.0086	2.233e-12	C11orf9	FADS1-FADS2-FADS3
834.601	PC(40:6)_[M+H]1+ / PE(43:6)_[M+H]1+	Glycerophospholipids (GP)	Glycerophosphocholines	Phosphatidylcholines (PC)	rs174533	chr11:61549025	A / G	-0.071	0.0081	1.715e-18	C11orf9	FADS1-FADS2-FADS3
836.616	PC(40:5)_[M+H]1+	Glycerophospholipids (GP)	Glycerophosphocholines	Phosphatidylcholines (PC)	rs174533	chr11:61549025	A / G	-0.0988	0.0072	1.424e-42	C11orf9	FADS1-FADS2-FADS3
838.56	PC(36:5)_[M+OAc]1- / PS(40:4)_[M-H]1-	Glycerophospholipids (GP)	Glycerophosphocholines	Phosphatidylcholines (PC)	rs174533	chr11:61549025	A / G	-0.135	0.0127	2.836e-26	C11orf9	FADS1-FADS2-FADS3
842.592	PC(36:3)_[M+OAc]1- / PS(40:2)_[M-H]1-	Glycerophospholipids (GP)	Glycerophosphocholines	Phosphatidylcholines (PC)	rs174533	chr11:61549025	A / G	0.0776	0.0063	6.49e-35	C11orf9	FADS1-FADS2-FADS3
851.602	PI-O(36:0)_[M-H]1- / PG(37:0)_[M+OAc]1-	Glycerophospholipids (GP)	Glycerophosphoinositols	Phosphatidylinositols (PI)	rs174533	chr11:61549025	A / G	-0.0779	0.0083	5.718e-21	C11orf9	FADS1-FADS2-FADS3
857.519	PI(36:4)_[M-H]1-	Glycerophospholipids (GP)	Glycerophosphoinositols	Phosphatidylinositols (PI)	rs174533	chr11:61549025	A / G	-0.0596	0.0085	1.96e-12	C11orf9	FADS1-FADS2-FADS3
861.55	PI(36:2)_[M-H]1-	Glycerophospholipids (GP)	Glycerophosphoinositols	Phosphatidylinositols (PI)	rs174533	chr11:61549025	A / G	0.0628	0.0074	1.338e-17	C11orf9	FADS1-FADS2-FADS3
868.607	PC(38:4)_[M+OAc]1- / PS(42:3)_[M-H]1-	Glycerophospholipids (GP)	Glycerophosphocholines	Phosphatidylcholines (PC)	rs174533	chr11:61549025	A / G	-0.1314	0.0076	1.037e-66	C11orf9	FADS1-FADS2-FADS3
870.623	PC(38:3)_[M+OAc]1- / PS(42:2)_[M-H]1-	Glycerophospholipids (GP)	Glycerophosphocholines	Phosphatidylcholines (PC)	rs174533	chr11:61549025	A / G	0.0743	0.0084	1.007e-18	C11orf9	FADS1-FADS2-FADS3
885.55	PI(38:4)_[M-H]1-	Glycerophospholipids (GP)	Glycerophosphoinositols	Phosphatidylinositols (PI)	rs174533	chr11:61549025	A / G	-0.0671	0.0065	9.466e-25	C11orf9	FADS1-FADS2-FADS3
894.623	PC(40:5)_[M+OAc]1- / PS(44:4)_[M-H]1-	Glycerophospholipids (GP)	Glycerophosphocholines	Phosphatidylcholines (PC)	rs174533	chr11:61549025	A / G	-0.0888	0.008	7.943e-29	C11orf9	FADS1-FADS2-FADS3
896.639	PC(40:4)_[M+OAc]1- / PS(44:3)_[M-H]1-	Glycerophospholipids (GP)	Glycerophosphocholines	Phosphatidylcholines (PC)	rs174533	chr11:61549025	A / G	-0.0873	0.01	2.864e-18	C11orf9	FADS1-FADS2-FADS3
902.817	TG(54:3)_[M+NH4]1+	Glycerolipids (GL)	Triradylglycerols	Triacylglycerols (TG)	rs174533	chr11:61549025	A / G	0.0581	0.0093	3.647e-10	C11orf9	FADS1-FADS2-FADS3
920.566	PS(42:7)_[M+OAc]1-	Glycerophospholipids (GP)	Glycerophosphoserines	Phosphatidylserines (PS)	rs174533	chr11:61549025	A / G	-0.1712	0.0212	6.829e-16	C11orf9	FADS1-FADS2-FADS3
922.785	TG(56:7)_[M+NH4]1+	Glycerolipids (GL)	Triradylglycerols	Triacylglycerols (TG)	rs174533	chr11:61549025	A / G	-0.0791	0.0113	2.74e-12	C11orf9	FADS1-FADS2-FADS3
923.587	PI(36:1)_[M+OAc]1-	Glycerophospholipids (GP)	Glycerophosphoinositols	Phosphatidylinositols (PI)	rs174533	chr11:61549025	A / G	-0.124	0.0105	2.26e-32	C11orf9	FADS1-FADS2-FADS3
924.597	PS(42:5)_[M+OAc]1-	Glycerophospholipids (GP)	Glycerophosphoserines	Phosphatidylserines (PS)	rs174533	chr11:61549025	A / G	0.0798	0.0094	1.79e-17	C11orf9	FADS1-FADS2-FADS3
924.67	PC(42:4)_[M+OAc]1-	Glycerophospholipids (GP)	Glycerophosphocholines	Phosphatidylcholines (PC)	rs174533	chr11:61549025	A / G	-0.1164	0.0106	5.934e-28	C11orf9	FADS1-FADS2-FADS3
924.801	TG(56:6)_[M+NH4]1+	Glycerolipids (GL)	Triradylglycerols	Triacylglycerols (TG)	rs174533	chr11:61549025	A / G	-0.0775	0.0093	5.832e-17	C11orf9	FADS1-FADS2-FADS3
925.602	PI(36:0)_[M+OAc]1-	Glycerophospholipids (GP)	Glycerophosphoinositols	Phosphatidylinositols (PI)	rs174533	chr11:61549025	A / G	0.0763	0.01	2.624e-14	C11orf9	FADS1-FADS2-FADS3
928.833	TG(56:4)_[M+NH4]1+	Glycerolipids (GL)	Triradylglycerols	Triacylglycerols (TG)	rs174533	chr11:61549025	A / G	0.0804	0.012	2.003e-11	C11orf9	FADS1-FADS2-FADS3
946.785	TG(58:9)_[M+NH4]1+	Glycerolipids (GL)	Triradylglycerols	Triacylglycerols (TG)	rs174533	chr11:61549025	A / G	-0.167	0.0214	5.824e-15	C11orf9	FADS1-FADS2-FADS3
303.233	FA(20:4)_[M-H]1-	Fatty acyls (FA)	Fatty acids and conjugates	Free fatty acids (FA)	rs174534	chr11:61549458	G / A	-0.1001	0.0081	2.248e-35	C11orf9	FADS1-FADS2-FADS3
329.249	FA(22:5)_[M-H]1-	Fatty acyls (FA)	Fatty acids and conjugates	Free fatty acids (FA)	rs174534	chr11:61549458	G / A	-0.0682	0.0105	1.005e-10	C11orf9	FADS1-FADS2-FADS3
331.264	FA(22:4)_[M-H]1-	Fatty acyls (FA)	Fatty acids and conjugates	Free fatty acids (FA)	rs174534	chr11:61549458	G / A	-0.0927	0.0108	1.214e-17	C11orf9	FADS1-FADS2-FADS3
544.34	LPC(20:4)_[M+H]1+	Glycerophospholipids (GP)	Glycerophosphocholines	Lysophosphatidylcholines (LPC)	rs174534	chr11:61549458	G / A	-0.1283	0.0107	2.517e-33	C11orf9	FADS1-FADS2-FADS3
664.603	CE(18:3)_[M+NH4]1+	Sterol lipids (ST)	Sterols	Cholesteryl esters (CE)	rs174534	chr11:61549458	G / A	-0.0612	0.0084	3.81e-13	C11orf9	FADS1-FADS2-FADS3
688.603	CE(20:5)_[M+NH4]1+	Sterol lipids (ST)	Sterols	Cholesteryl esters (CE)	rs174534	chr11:61549458	G / A	-0.175	0.0145	1.302e-33	C11orf9	FADS1-FADS2-FADS3
690.618	CE(20:4)_[M+NH4]1+	Sterol lipids (ST)	Sterols	Cholesteryl esters (CE)	rs174534	chr11:61549458	G / A	-0.1737	0.0089	1.552e-85	C11orf9	FADS1-FADS2-FADS3
716.523	PE(34:2)_[M+H]1+	Glycerophospholipids (GP)	Glycerophosphoethanolamines	Phosphatidylethanolamines (PE)	rs174534	chr11:61549458	G / A	0.1189	0.012	5.044e-23	C11orf9	FADS1-FADS2-FADS3
734.57	PC(32:0)_[M+H]1+ / PE(35:0)_[M+H]1+ / PA(37:1)_[M+NH4]1+	Glycerophospholipids (GP)	Glycerophosphocholines	Phosphatidylcholines (PC)	rs174534	chr11:61549458	G / A	-0.0414	0.0054	2.526e-14	C11orf9	FADS1-FADS2-FADS3
742.539	PC(33:3)_[M+H]1+ / PE(36:3)_[M+H]1+ / PA(38:4)_[M+NH4]1+	Glycerophospholipids (GP)	Glycerophosphocholines	Phosphatidylcholines (PC)	rs174534	chr11:61549458	G / A	0.1067	0.0122	2.297e-18	C11orf9	FADS1-FADS2-FADS3
744.554	PC(33:2)_[M+H]1+ / PE(36:2)_[M+H]1+ / PA(38:3)_[M+NH4]1+	Glycerophospholipids (GP)	Glycerophosphocholines	Phosphatidylcholines (PC)	rs174534	chr11:61549458	G / A	0.0665	0.0066	3.908e-24	C11orf9	FADS1-FADS2-FADS3
745.575	PA(39:1)_[M+H]1+	Glycerophospholipids (GP)	Glycerophosphates	Phosphatidates (PA)	rs174534	chr11:61549458	G / A	0.0621	0.0062	2.83e-23	C11orf9	FADS1-FADS2-FADS3
749.534	PG(34:0)_[M-H]1-	Glycerophospholipids (GP)	Glycerophosphoglycerols	Phosphatidylglycerols (PG)	rs174534	chr11:61549458	G / A	-0.063	0.0079	1.165e-15	C11orf9	FADS1-FADS2-FADS3
750.544	PE-O(38:6)_[M+H]1+ / PC-P(35:5)_[M+H]1+	Glycerophospholipids (GP)	Glycerophosphoethanolamines	Phosphatidylethanolamines (PE)	rs174534	chr11:61549458	G / A	-0.0731	0.0086	2.348e-17	C11orf9	FADS1-FADS2-FADS3
752.559	PE-O(38:4)_[M-H]1- / PC-O(35:4)_[M-H]1- / PC-P(35:3)_[M-H]1-	Glycerophospholipids (GP)	Glycerophosphoethanolamines	Phosphatidylethanolamines (PE)	rs174534	chr11:61549458	G / A	-0.0908	0.0094	3.45e-22	C11orf9	FADS1-FADS2-FADS3
758.57	PC(34:2)_[M+H]1+ / PE(37:2)_[M+H]1+ / PA(39:3)_[M+NH4]1+	Glycerophospholipids (GP)	Glycerophosphocholines	Phosphatidylcholines (PC)	rs174534	chr11:61549458	G / A	0.038	0.0045	2.921e-17	C11orf9	FADS1-FADS2-FADS3
764.524	PE(38:5)_[M-H]1-	Glycerophospholipids (GP)	Glycerophosphoethanolamines	Phosphatidylethanolamines (PE)	rs174534	chr11:61549458	G / A	-0.089	0.0099	2.548e-19	C11orf9	FADS1-FADS2-FADS3
766.574	PC-O(36:5)_[M+H]1+ / PC-P(36:4)_[M+H]1+	Glycerophospholipids (GP)	Glycerophosphocholines	Phosphatidylcholines (PC)	rs174534	chr11:61549458	G / A	-0.1134	0.0069	3.861e-61	C11orf9	FADS1-FADS2-FADS3
768.554	PC(35:4)_[M+H]1+ / PE(38:4)_[M+H]1+ / PA(40:5)_[M+NH4]1+	Glycerophospholipids (GP)	Glycerophosphocholines	Phosphatidylcholines (PC)	rs174534	chr11:61549458	G / A	-0.0903	0.0072	2.897e-36	C11orf9	FADS1-FADS2-FADS3
770.57	PC(35:3)_[M+H]1+ / PE(38:3)_[M+H]1+ / PA(40:4)_[M+NH4]1+	Glycerophospholipids (GP)	Glycerophosphocholines	Phosphatidylcholines (PC)	rs174534	chr11:61549458	G / A	0.0661	0.0079	5.533e-17	C11orf9	FADS1-FADS2-FADS3
770.606	PC-O(36:3)_M+H]1+ / PC-P(36:2)_M+H]1+	Glycerophospholipids (GP)	Glycerophosphocholines	Phosphatidylcholines (PC)	rs174534	chr11:61549458	G / A	0.0819	0.0078	6.654e-26	C11orf9	FADS1-FADS2-FADS3
771.59	PA(41:2)_[M+H]1+	Glycerophospholipids (GP)	Glycerophosphates	Phosphatidates (PA)	rs174534	chr11:61549458	G / A	0.0866	0.0108	1.34e-15	C11orf9	FADS1-FADS2-FADS3
777.565	PG(36:0)_[M-H]1-	Glycerophospholipids (GP)	Glycerophosphoglycerols	Phosphatidylglycerols (PG)	rs174534	chr11:61549458	G / A	-0.0502	0.0065	1.361e-14	C11orf9	FADS1-FADS2-FADS3
784.586	PC(36:3)_[M+H]1+ / PE(39:3)_[M+H]1+ / PA(41:4)_[M+NH4]1+	Glycerophospholipids (GP)	Glycerophosphocholines	Phosphatidylcholines (PC)	rs174534	chr11:61549458	G / A	0.0661	0.0043	2.435e-53	C11orf9	FADS1-FADS2-FADS3
786.601	PC(36:2)_[M+H]1+ / PE(39:2)_[M+H]1+ / PA(41:3)_[M+NH4]1+	Glycerophospholipids (GP)	Glycerophosphocholines	Phosphatidylcholines (PC)	rs174534	chr11:61549458	G / A	0.0283	0.0044	1.259e-10	C11orf9	FADS1-FADS2-FADS3
793.575	PA(43:4)_[M-H]1-	Glycerophospholipids (GP)	Glycerophosphates	Phosphatidates (PA)	rs174534	chr11:61549458	G / A	-0.0837	0.0077	8.994e-28	C11orf9	FADS1-FADS2-FADS3
794.606	PC-O(38:5)_[M+H]1+ / PC-P(38:4)_[M+H]1+	Glycerophospholipids (GP)	Glycerophosphocholines	Phosphatidylcholines (PC)	rs174534	chr11:61549458	G / A	-0.0825	0.0068	2.565e-34	C11orf9	FADS1-FADS2-FADS3
796.586	PC(37:4)_[M+H]1+ / PE(40:4)_[M+H]1+ / PA(42:5)_[M+NH4]1+	Glycerophospholipids (GP)	Glycerophosphocholines	Phosphatidylcholines (PC)	rs174534	chr11:61549458	G / A	-0.1387	0.0098	1.144e-45	C11orf9	FADS1-FADS2-FADS3
798.601	PC(37:4)_[M+H]1+ / PE(40:3)_[M+H]1+	Glycerophospholipids (GP)	Glycerophosphocholines	Phosphatidylcholines (PC)	rs174534	chr11:61549458	G / A	0.0611	0.0084	3.922e-13	C11orf9	FADS1-FADS2-FADS3
808.585	PC(38:5)_[M+H]1+ / PE(41:5)_[M+H]1+ / PA(43:6)_[M+NH4]1+	Glycerophospholipids (GP)	Glycerophosphocholines	Phosphatidylcholines (PC)	rs174534	chr11:61549458	G / A	-0.0736	0.0057	4.415e-38	C11orf9	FADS1-FADS2-FADS3
809.555	PI-O(33:0)_[M-H]1-	Glycerophospholipids (GP)	Glycerophosphoinositols	Phosphatidylinositols (PI)	rs174534	chr11:61549458	G / A	-0.1503	0.0231	8.04e-11	C11orf9	FADS1-FADS2-FADS3
810.601	PC(38:4)_[M+H]1+ / PE(41:4)_[M+H]1+	Glycerophospholipids (GP)	Glycerophosphocholines	Phosphatidylcholines (PC)	rs174534	chr11:61549458	G / A	-0.1336	0.0066	1.3e-91	C11orf9	FADS1-FADS2-FADS3
812.617	PC(38:3)_[M+H]1+ / PE(41:3)_[M+H]1+ / PA(43:4)_[M+NH4]1+	Glycerophospholipids (GP)	Glycerophosphocholines	Phosphatidylcholines (PC)	rs174534	chr11:61549458	G / A	0.0581	0.0067	5.686e-18	C11orf9	FADS1-FADS2-FADS3
820.621	PC-O(40:6)_[M+H]1+ / PC-P(40:5)_[M+H]1+	Glycerophospholipids (GP)	Glycerophosphocholines	Phosphatidylcholines (PC)	rs174534	chr11:61549458	G / A	-0.0505	0.0071	9.982e-13	C11orf9	FADS1-FADS2-FADS3
822.637	PC-O(40:5)_[M+H]1+ / PC-P(40:4)_[M+H]1+	Glycerophospholipids (GP)	Glycerophosphocholines	Phosphatidylcholines (PC)	rs174534	chr11:61549458	G / A	-0.0706	0.0075	6.23e-21	C11orf9	FADS1-FADS2-FADS3
825.592	SM(44:9)_[M+H]1-	Sphingolipids (SP)	Phosphosphingolipids	Sphingomyelins (SM)	rs174534	chr11:61549458	G / A	-0.1401	0.0084	4.49e-62	C11orf9	FADS1-FADS2-FADS3
832.535	PS(35:2) _[M+OAc]1-	Glycerophospholipids (GP)	Glycerophosphoserines	Phosphatidylserines (PS)	rs174534	chr11:61549458	G / A	-0.1415	0.0223	2.272e-10	C11orf9	FADS1-FADS2-FADS3
836.616	PC(40:5)_[M+H]1+	Glycerophospholipids (GP)	Glycerophosphocholines	Phosphatidylcholines (PC)	rs174534	chr11:61549458	G / A	-0.0986	0.0076	1.199e-38	C11orf9	FADS1-FADS2-FADS3
838.56	PC(36:5)_[M+OAc]1- / PS(40:4)_[M-H]1-	Glycerophospholipids (GP)	Glycerophosphocholines	Phosphatidylcholines (PC)	rs174534	chr11:61549458	G / A	-0.1333	0.0134	2.308e-23	C11orf9	FADS1-FADS2-FADS3
842.592	PC(36:3)_[M+OAc]1- / PS(40:2)_[M-H]1-	Glycerophospholipids (GP)	Glycerophosphocholines	Phosphatidylcholines (PC)	rs174534	chr11:61549458	G / A	0.0729	0.0066	1.605e-28	C11orf9	FADS1-FADS2-FADS3
851.602	PI-O(36:0)_[M-H]1- / PG(37:0)_[M+OAc]1-	Glycerophospholipids (GP)	Glycerophosphoinositols	Phosphatidylinositols (PI)	rs174534	chr11:61549458	G / A	-0.073	0.0087	6.561e-17	C11orf9	FADS1-FADS2-FADS3
857.519	PI(36:4)_[M-H]1-	Glycerophospholipids (GP)	Glycerophosphoinositols	Phosphatidylinositols (PI)	rs174534	chr11:61549458	G / A	-0.0672	0.0088	3.182e-14	C11orf9	FADS1-FADS2-FADS3
861.55	PI(36:2)_[M-H]1-	Glycerophospholipids (GP)	Glycerophosphoinositols	Phosphatidylinositols (PI)	rs174534	chr11:61549458	G / A	0.0568	0.0077	1.691e-13	C11orf9	FADS1-FADS2-FADS3
868.607	PC(38:4)_[M+OAc]1- / PS(42:3)_[M-H]1-	Glycerophospholipids (GP)	Glycerophosphocholines	Phosphatidylcholines (PC)	rs174534	chr11:61549458	G / A	-0.131	0.008	1.269e-60	C11orf9	FADS1-FADS2-FADS3
870.623	PC(38:3)_[M+OAc]1- / PS(42:2)_[M-H]1-	Glycerophospholipids (GP)	Glycerophosphocholines	Phosphatidylcholines (PC)	rs174534	chr11:61549458	G / A	0.0746	0.0088	2.246e-17	C11orf9	FADS1-FADS2-FADS3
885.55	PI(38:4)_[M-H]1-	Glycerophospholipids (GP)	Glycerophosphoinositols	Phosphatidylinositols (PI)	rs174534	chr11:61549458	G / A	-0.0706	0.0069	8.886e-25	C11orf9	FADS1-FADS2-FADS3
894.623	PC(40:5)_[M+OAc]1- / PS(44:4)_[M-H]1-	Glycerophospholipids (GP)	Glycerophosphocholines	Phosphatidylcholines (PC)	rs174534	chr11:61549458	G / A	-0.0902	0.0083	2.525e-27	C11orf9	FADS1-FADS2-FADS3
896.639	PC(40:4)_[M+OAc]1- / PS(44:3)_[M-H]1-	Glycerophospholipids (GP)	Glycerophosphocholines	Phosphatidylcholines (PC)	rs174534	chr11:61549458	G / A	-0.0914	0.0105	3.574e-18	C11orf9	FADS1-FADS2-FADS3
920.566	PS(42:7)_[M+OAc]1-	Glycerophospholipids (GP)	Glycerophosphoserines	Phosphatidylserines (PS)	rs174534	chr11:61549458	G / A	-0.1645	0.0221	1.062e-13	C11orf9	FADS1-FADS2-FADS3
922.785	TG(56:7)_[M+NH4]1+	Glycerolipids (GL)	Triradylglycerols	Triacylglycerols (TG)	rs174534	chr11:61549458	G / A	-0.0739	0.0119	5.267e-10	C11orf9	FADS1-FADS2-FADS3
923.587	PI(36:1)_[M+OAc]1-	Glycerophospholipids (GP)	Glycerophosphoinositols	Phosphatidylinositols (PI)	rs174534	chr11:61549458	G / A	-0.1266	0.0109	5.028e-31	C11orf9	FADS1-FADS2-FADS3
924.597	PS(42:5)_[M+OAc]1-	Glycerophospholipids (GP)	Glycerophosphoserines	Phosphatidylserines (PS)	rs174534	chr11:61549458	G / A	0.0723	0.0098	1.879e-13	C11orf9	FADS1-FADS2-FADS3
924.67	PC(42:4)_[M+OAc]1-	Glycerophospholipids (GP)	Glycerophosphocholines	Phosphatidylcholines (PC)	rs174534	chr11:61549458	G / A	-0.1179	0.0112	4.428e-26	C11orf9	FADS1-FADS2-FADS3
924.801	TG(56:6)_[M+NH4]1+	Glycerolipids (GL)	Triradylglycerols	Triacylglycerols (TG)	rs174534	chr11:61549458	G / A	-0.0763	0.0097	3.62e-15	C11orf9	FADS1-FADS2-FADS3
925.602	PI(36:0)_[M+OAc]1-	Glycerophospholipids (GP)	Glycerophosphoinositols	Phosphatidylinositols (PI)	rs174534	chr11:61549458	G / A	0.0682	0.0105	8.301e-11	C11orf9	FADS1-FADS2-FADS3
928.833	TG(56:4)_[M+NH4]1+	Glycerolipids (GL)	Triradylglycerols	Triacylglycerols (TG)	rs174534	chr11:61549458	G / A	0.0784	0.0126	4.42e-10	C11orf9	FADS1-FADS2-FADS3
946.785	TG(58:9)_[M+NH4]1+	Glycerolipids (GL)	Triradylglycerols	Triacylglycerols (TG)	rs174534	chr11:61549458	G / A	-0.1557	0.0224	3.735e-12	C11orf9	FADS1-FADS2-FADS3
950.613	PS(44:6)_[M+OAc]1-	Glycerophospholipids (GP)	Glycerophosphoserines	Phosphatidylserines (PS)	rs174534	chr11:61549458	G / A	-0.1372	0.0118	3.589e-31	C11orf9	FADS1-FADS2-FADS3
303.233	FA(20:4)_[M-H]1-	Fatty acyls (FA)	Fatty acids and conjugates	Free fatty acids (FA)	rs174535	chr11:61551356	C / T	-0.1017	0.0077	6.022e-40	C11orf9	FADS1-FADS2-FADS3
329.249	FA(22:5)_[M-H]1-	Fatty acyls (FA)	Fatty acids and conjugates	Free fatty acids (FA)	rs174535	chr11:61551356	C / T	-0.0707	0.0101	2.315e-12	C11orf9	FADS1-FADS2-FADS3
331.264	FA(22:4)_[M-H]1-	Fatty acyls (FA)	Fatty acids and conjugates	Free fatty acids (FA)	rs174535	chr11:61551356	C / T	-0.092	0.0104	7.718e-19	C11orf9	FADS1-FADS2-FADS3
544.34	LPC(20:4)_[M+H]1+	Glycerophospholipids (GP)	Glycerophosphocholines	Lysophosphatidylcholines (LPC)	rs174535	chr11:61551356	C / T	-0.1245	0.0102	2.262e-34	C11orf9	FADS1-FADS2-FADS3
601.519	DG(36:3)_[M+H-H2O]1+	Glycerolipids (GL)	Diradylglycerols	Diacylglycerols (DG)	rs174535	chr11:61551356	C / T	0.0597	0.0092	6.747e-11	C11orf9	FADS1-FADS2-FADS3
603.535	DG(36:2)_[M+H-H2O]1+	Glycerolipids (GL)	Diradylglycerols	Diacylglycerols (DG)	rs174535	chr11:61551356	C / T	0.0482	0.0078	7.359e-10	C11orf9	FADS1-FADS2-FADS3
642.618	CE(16:0)_[M+NH4]1+	Sterol lipids (ST)	Sterols	Cholesteryl esters (CE)	rs174535	chr11:61551356	C / T	-0.0355	0.0055	1.206e-10	C11orf9	FADS1-FADS2-FADS3
664.603	CE(18:3)_[M+NH4]1+	Sterol lipids (ST)	Sterols	Cholesteryl esters (CE)	rs174535	chr11:61551356	C / T	-0.0672	0.008	5.115e-17	C11orf9	FADS1-FADS2-FADS3
671.466	PA(34:2)_[M-H]1-	Glycerophospholipids (GP)	Glycerophosphates	Phosphatidates (PA)	rs174535	chr11:61551356	C / T	0.0612	0.0099	7.374e-10	C11orf9	FADS1-FADS2-FADS3
688.603	CE(20:5)_[M+NH4]1+	Sterol lipids (ST)	Sterols	Cholesteryl esters (CE)	rs174535	chr11:61551356	C / T	-0.1905	0.0138	1.982e-43	C11orf9	FADS1-FADS2-FADS3
690.618	CE(20:4)_[M+NH4]1+	Sterol lipids (ST)	Sterols	Cholesteryl esters (CE)	rs174535	chr11:61551356	C / T	-0.1803	0.0085	6.97e-101	C11orf9	FADS1-FADS2-FADS3
716.523	PE(34:2)_[M+H]1+	Glycerophospholipids (GP)	Glycerophosphoethanolamines	Phosphatidylethanolamines (PE)	rs174535	chr11:61551356	C / T	0.1256	0.0115	6.787e-28	C11orf9	FADS1-FADS2-FADS3
734.57	PC(32:0)_[M+H]1+ / PE(35:0)_[M+H]1+ / PA(37:1)_[M+NH4]1+	Glycerophospholipids (GP)	Glycerophosphocholines	Phosphatidylcholines (PC)	rs174535	chr11:61551356	C / T	-0.0448	0.0051	2.896e-18	C11orf9	FADS1-FADS2-FADS3
742.539	PC(33:3)_[M+H]1+ / PE(36:3)_[M+H]1+ / PA(38:4)_[M+NH4]1+	Glycerophospholipids (GP)	Glycerophosphocholines	Phosphatidylcholines (PC)	rs174535	chr11:61551356	C / T	0.1159	0.0116	2.087e-23	C11orf9	FADS1-FADS2-FADS3
744.554	PC(33:2)_[M+H]1+ / PE(36:2)_[M+H]1+ / PA(38:3)_[M+NH4]1+	Glycerophospholipids (GP)	Glycerophosphocholines	Phosphatidylcholines (PC)	rs174535	chr11:61551356	C / T	0.0709	0.0063	1.213e-29	C11orf9	FADS1-FADS2-FADS3
745.575	PA(39:1)_[M+H]1+	Glycerophospholipids (GP)	Glycerophosphates	Phosphatidates (PA)	rs174535	chr11:61551356	C / T	0.0637	0.0059	6.456e-27	C11orf9	FADS1-FADS2-FADS3
749.534	PG(34:0)_[M-H]1-	Glycerophospholipids (GP)	Glycerophosphoglycerols	Phosphatidylglycerols (PG)	rs174535	chr11:61551356	C / T	-0.0631	0.0074	2.068e-17	C11orf9	FADS1-FADS2-FADS3
750.544	PE-O(38:6)_[M+H]1+ / PC-P(35:5)_[M+H]1+	Glycerophospholipids (GP)	Glycerophosphoethanolamines	Phosphatidylethanolamines (PE)	rs174535	chr11:61551356	C / T	-0.0734	0.0082	3.068e-19	C11orf9	FADS1-FADS2-FADS3
752.559	PE-O(38:4)_[M-H]1- / PC-O(35:4)_[M-H]1- / PC-P(35:3)_[M-H]1-	Glycerophospholipids (GP)	Glycerophosphoethanolamines	Phosphatidylethanolamines (PE)	rs174535	chr11:61551356	C / T	-0.0948	0.0089	1.362e-26	C11orf9	FADS1-FADS2-FADS3
758.57	PC(34:2)_[M+H]1+ / PE(37:2)_[M+H]1+ / PA(39:3)_[M+NH4]1+	Glycerophospholipids (GP)	Glycerophosphocholines	Phosphatidylcholines (PC)	rs174535	chr11:61551356	C / T	0.0391	0.0043	5.132e-20	C11orf9	FADS1-FADS2-FADS3
764.524	PE(38:5)_[M-H]1-	Glycerophospholipids (GP)	Glycerophosphoethanolamines	Phosphatidylethanolamines (PE)	rs174535	chr11:61551356	C / T	-0.0919	0.0094	1.219e-22	C11orf9	FADS1-FADS2-FADS3
766.574	PC-O(36:5)_[M+H]1+ / PC-P(36:4)_[M+H]1+	Glycerophospholipids (GP)	Glycerophosphocholines	Phosphatidylcholines (PC)	rs174535	chr11:61551356	C / T	-0.1164	0.0065	5.181e-71	C11orf9	FADS1-FADS2-FADS3
768.554	PC(35:4)_[M+H]1+ / PE(38:4)_[M+H]1+ / PA(40:5)_[M+NH4]1+	Glycerophospholipids (GP)	Glycerophosphocholines	Phosphatidylcholines (PC)	rs174535	chr11:61551356	C / T	-0.0914	0.0068	1.007e-40	C11orf9	FADS1-FADS2-FADS3
770.57	PC(35:3)_[M+H]1+ / PE(38:3)_[M+H]1+ / PA(40:4)_[M+NH4]1+	Glycerophospholipids (GP)	Glycerophosphocholines	Phosphatidylcholines (PC)	rs174535	chr11:61551356	C / T	0.0662	0.0075	1.315e-18	C11orf9	FADS1-FADS2-FADS3
770.606	PC-O(36:3)_M+H]1+ / PC-P(36:2)_M+H]1+	Glycerophospholipids (GP)	Glycerophosphocholines	Phosphatidylcholines (PC)	rs174535	chr11:61551356	C / T	0.0784	0.0074	3.212e-26	C11orf9	FADS1-FADS2-FADS3
771.59	PA(41:2)_[M+H]1+	Glycerophospholipids (GP)	Glycerophosphates	Phosphatidates (PA)	rs174535	chr11:61551356	C / T	0.0824	0.0103	1.342e-15	C11orf9	FADS1-FADS2-FADS3
777.565	PG(36:0)_[M-H]1-	Glycerophospholipids (GP)	Glycerophosphoglycerols	Phosphatidylglycerols (PG)	rs174535	chr11:61551356	C / T	-0.0539	0.0062	2.817e-18	C11orf9	FADS1-FADS2-FADS3
784.586	PC(36:3)_[M+H]1+ / PE(39:3)_[M+H]1+ / PA(41:4)_[M+NH4]1+	Glycerophospholipids (GP)	Glycerophosphocholines	Phosphatidylcholines (PC)	rs174535	chr11:61551356	C / T	0.065	0.0041	1.794e-56	C11orf9	FADS1-FADS2-FADS3
786.601	PC(36:2)_[M+H]1+ / PE(39:2)_[M+H]1+ / PA(41:3)_[M+NH4]1+	Glycerophospholipids (GP)	Glycerophosphocholines	Phosphatidylcholines (PC)	rs174535	chr11:61551356	C / T	0.0284	0.0042	1.479e-11	C11orf9	FADS1-FADS2-FADS3
793.575	PA(43:4)_[M-H]1-	Glycerophospholipids (GP)	Glycerophosphates	Phosphatidates (PA)	rs174535	chr11:61551356	C / T	-0.0853	0.0073	9.701e-32	C11orf9	FADS1-FADS2-FADS3
794.606	PC-O(38:5)_[M+H]1+ / PC-P(38:4)_[M+H]1+	Glycerophospholipids (GP)	Glycerophosphocholines	Phosphatidylcholines (PC)	rs174535	chr11:61551356	C / T	-0.0844	0.0064	1.391e-39	C11orf9	FADS1-FADS2-FADS3
796.586	PC(37:4)_[M+H]1+ / PE(40:4)_[M+H]1+ / PA(42:5)_[M+NH4]1+	Glycerophospholipids (GP)	Glycerophosphocholines	Phosphatidylcholines (PC)	rs174535	chr11:61551356	C / T	-0.1382	0.0093	5.908e-50	C11orf9	FADS1-FADS2-FADS3
798.601	PC(37:4)_[M+H]1+ / PE(40:3)_[M+H]1+	Glycerophospholipids (GP)	Glycerophosphocholines	Phosphatidylcholines (PC)	rs174535	chr11:61551356	C / T	0.0629	0.008	4.074e-15	C11orf9	FADS1-FADS2-FADS3
808.585	PC(38:5)_[M+H]1+ / PE(41:5)_[M+H]1+ / PA(43:6)_[M+NH4]1+	Glycerophospholipids (GP)	Glycerophosphocholines	Phosphatidylcholines (PC)	rs174535	chr11:61551356	C / T	-0.0765	0.0054	2.414e-45	C11orf9	FADS1-FADS2-FADS3
810.601	PC(38:4)_[M+H]1+ / PE(41:4)_[M+H]1+	Glycerophospholipids (GP)	Glycerophosphocholines	Phosphatidylcholines (PC)	rs174535	chr11:61551356	C / T	-0.1364	0.0062	9.9e-106	C11orf9	FADS1-FADS2-FADS3
812.617	PC(38:3)_[M+H]1+ / PE(41:3)_[M+H]1+ / PA(43:4)_[M+NH4]1+	Glycerophospholipids (GP)	Glycerophosphocholines	Phosphatidylcholines (PC)	rs174535	chr11:61551356	C / T	0.0532	0.0064	5.642e-17	C11orf9	FADS1-FADS2-FADS3
820.621	PC-O(40:6)_[M+H]1+ / PC-P(40:5)_[M+H]1+	Glycerophospholipids (GP)	Glycerophosphocholines	Phosphatidylcholines (PC)	rs174535	chr11:61551356	C / T	-0.0554	0.0067	2.192e-16	C11orf9	FADS1-FADS2-FADS3
822.637	PC-O(40:5)_[M+H]1+ / PC-P(40:4)_[M+H]1+	Glycerophospholipids (GP)	Glycerophosphocholines	Phosphatidylcholines (PC)	rs174535	chr11:61551356	C / T	-0.0712	0.0071	1.853e-23	C11orf9	FADS1-FADS2-FADS3
825.592	SM(44:9)_[M+H]1-	Sphingolipids (SP)	Phosphosphingolipids	Sphingomyelins (SM)	rs174535	chr11:61551356	C / T	-0.1398	0.008	3.708e-68	C11orf9	FADS1-FADS2-FADS3
832.535	PS(35:2) _[M+OAc]1-	Glycerophospholipids (GP)	Glycerophosphoserines	Phosphatidylserines (PS)	rs174535	chr11:61551356	C / T	-0.138	0.0212	7.86e-11	C11orf9	FADS1-FADS2-FADS3
833.519	PI(34:2)_[M-H]1-	Glycerophospholipids (GP)	Glycerophosphoinositols	Phosphatidylinositols (PI)	rs174535	chr11:61551356	C / T	0.0579	0.0086	1.467e-11	C11orf9	FADS1-FADS2-FADS3
834.601	PC(40:6)_[M+H]1+ / PE(43:6)_[M+H]1+	Glycerophospholipids (GP)	Glycerophosphocholines	Phosphatidylcholines (PC)	rs174535	chr11:61551356	C / T	-0.0724	0.008	2.256e-19	C11orf9	FADS1-FADS2-FADS3
836.616	PC(40:5)_[M+H]1+	Glycerophospholipids (GP)	Glycerophosphocholines	Phosphatidylcholines (PC)	rs174535	chr11:61551356	C / T	-0.1013	0.0072	1.753e-44	C11orf9	FADS1-FADS2-FADS3
838.56	PC(36:5)_[M+OAc]1- / PS(40:4)_[M-H]1-	Glycerophospholipids (GP)	Glycerophosphocholines	Phosphatidylcholines (PC)	rs174535	chr11:61551356	C / T	-0.1381	0.0127	1.597e-27	C11orf9	FADS1-FADS2-FADS3
842.592	PC(36:3)_[M+OAc]1- / PS(40:2)_[M-H]1-	Glycerophospholipids (GP)	Glycerophosphocholines	Phosphatidylcholines (PC)	rs174535	chr11:61551356	C / T	0.0759	0.0063	1.035e-33	C11orf9	FADS1-FADS2-FADS3
851.602	PI-O(36:0)_[M-H]1- / PG(37:0)_[M+OAc]1-	Glycerophospholipids (GP)	Glycerophosphoinositols	Phosphatidylinositols (PI)	rs174535	chr11:61551356	C / T	-0.0781	0.0083	4.868e-21	C11orf9	FADS1-FADS2-FADS3
857.519	PI(36:4)_[M-H]1-	Glycerophospholipids (GP)	Glycerophosphoinositols	Phosphatidylinositols (PI)	rs174535	chr11:61551356	C / T	-0.0629	0.0084	8.372e-14	C11orf9	FADS1-FADS2-FADS3
861.55	PI(36:2)_[M-H]1-	Glycerophospholipids (GP)	Glycerophosphoinositols	Phosphatidylinositols (PI)	rs174535	chr11:61551356	C / T	0.0611	0.0074	9.105e-17	C11orf9	FADS1-FADS2-FADS3
868.607	PC(38:4)_[M+OAc]1- / PS(42:3)_[M-H]1-	Glycerophospholipids (GP)	Glycerophosphocholines	Phosphatidylcholines (PC)	rs174535	chr11:61551356	C / T	-0.1335	0.0076	3.697e-69	C11orf9	FADS1-FADS2-FADS3
870.623	PC(38:3)_[M+OAc]1- / PS(42:2)_[M-H]1-	Glycerophospholipids (GP)	Glycerophosphocholines	Phosphatidylcholines (PC)	rs174535	chr11:61551356	C / T	0.0705	0.0084	4.206e-17	C11orf9	FADS1-FADS2-FADS3
885.55	PI(38:4)_[M-H]1-	Glycerophospholipids (GP)	Glycerophosphoinositols	Phosphatidylinositols (PI)	rs174535	chr11:61551356	C / T	-0.0691	0.0065	3.65e-26	C11orf9	FADS1-FADS2-FADS3
894.623	PC(40:5)_[M+OAc]1- / PS(44:4)_[M-H]1-	Glycerophospholipids (GP)	Glycerophosphocholines	Phosphatidylcholines (PC)	rs174535	chr11:61551356	C / T	-0.0914	0.0079	1.222e-30	C11orf9	FADS1-FADS2-FADS3
896.639	PC(40:4)_[M+OAc]1- / PS(44:3)_[M-H]1-	Glycerophospholipids (GP)	Glycerophosphocholines	Phosphatidylcholines (PC)	rs174535	chr11:61551356	C / T	-0.0903	0.01	1.873e-19	C11orf9	FADS1-FADS2-FADS3
902.817	TG(54:3)_[M+NH4]1+	Glycerolipids (GL)	Triradylglycerols	Triacylglycerols (TG)	rs174535	chr11:61551356	C / T	0.0579	0.0092	3.395e-10	C11orf9	FADS1-FADS2-FADS3
920.566	PS(42:7)_[M+OAc]1-	Glycerophospholipids (GP)	Glycerophosphoserines	Phosphatidylserines (PS)	rs174535	chr11:61551356	C / T	-0.174	0.0211	1.403e-16	C11orf9	FADS1-FADS2-FADS3
922.785	TG(56:7)_[M+NH4]1+	Glycerolipids (GL)	Triradylglycerols	Triacylglycerols (TG)	rs174535	chr11:61551356	C / T	-0.08	0.0113	1.585e-12	C11orf9	FADS1-FADS2-FADS3
923.587	PI(36:1)_[M+OAc]1-	Glycerophospholipids (GP)	Glycerophosphoinositols	Phosphatidylinositols (PI)	rs174535	chr11:61551356	C / T	-0.1269	0.0105	6.191e-34	C11orf9	FADS1-FADS2-FADS3
924.597	PS(42:5)_[M+OAc]1-	Glycerophospholipids (GP)	Glycerophosphoserines	Phosphatidylserines (PS)	rs174535	chr11:61551356	C / T	0.0761	0.0093	3.679e-16	C11orf9	FADS1-FADS2-FADS3
924.67	PC(42:4)_[M+OAc]1-	Glycerophospholipids (GP)	Glycerophosphocholines	Phosphatidylcholines (PC)	rs174535	chr11:61551356	C / T	-0.1192	0.0107	5.948e-29	C11orf9	FADS1-FADS2-FADS3
924.801	TG(56:6)_[M+NH4]1+	Glycerolipids (GL)	Triradylglycerols	Triacylglycerols (TG)	rs174535	chr11:61551356	C / T	-0.0778	0.0092	2.784e-17	C11orf9	FADS1-FADS2-FADS3
925.602	PI(36:0)_[M+OAc]1-	Glycerophospholipids (GP)	Glycerophosphoinositols	Phosphatidylinositols (PI)	rs174535	chr11:61551356	C / T	0.0727	0.01	3.63e-13	C11orf9	FADS1-FADS2-FADS3
928.833	TG(56:4)_[M+NH4]1+	Glycerolipids (GL)	Triradylglycerols	Triacylglycerols (TG)	rs174535	chr11:61551356	C / T	0.0791	0.0119	3.531e-11	C11orf9	FADS1-FADS2-FADS3
946.785	TG(58:9)_[M+NH4]1+	Glycerolipids (GL)	Triradylglycerols	Triacylglycerols (TG)	rs174535	chr11:61551356	C / T	-0.1693	0.0213	1.658e-15	C11orf9	FADS1-FADS2-FADS3
950.613	PS(44:6)_[M+OAc]1-	Glycerophospholipids (GP)	Glycerophosphoserines	Phosphatidylserines (PS)	rs174535	chr11:61551356	C / T	-0.1381	0.0112	7.854e-35	C11orf9	FADS1-FADS2-FADS3
303.233	FA(20:4)_[M-H]1-	Fatty acyls (FA)	Fatty acids and conjugates	Free fatty acids (FA)	rs174536	chr11:61551927	C / A	-0.1023	0.0077	6.271e-40	C11orf9	FADS1-FADS2-FADS3
329.249	FA(22:5)_[M-H]1-	Fatty acyls (FA)	Fatty acids and conjugates	Free fatty acids (FA)	rs174536	chr11:61551927	C / A	-0.0713	0.0101	1.928e-12	C11orf9	FADS1-FADS2-FADS3
331.264	FA(22:4)_[M-H]1-	Fatty acyls (FA)	Fatty acids and conjugates	Free fatty acids (FA)	rs174536	chr11:61551927	C / A	-0.0935	0.0104	2.848e-19	C11orf9	FADS1-FADS2-FADS3
544.34	LPC(20:4)_[M+H]1+	Glycerophospholipids (GP)	Glycerophosphocholines	Lysophosphatidylcholines (LPC)	rs174536	chr11:61551927	C / A	-0.1258	0.0102	9.945e-35	C11orf9	FADS1-FADS2-FADS3
601.519	DG(36:3)_[M+H-H2O]1+	Glycerolipids (GL)	Diradylglycerols	Diacylglycerols (DG)	rs174536	chr11:61551927	C / A	0.0609	0.0092	3.469e-11	C11orf9	FADS1-FADS2-FADS3
603.535	DG(36:2)_[M+H-H2O]1+	Glycerolipids (GL)	Diradylglycerols	Diacylglycerols (DG)	rs174536	chr11:61551927	C / A	0.0486	0.0078	5.235e-10	C11orf9	FADS1-FADS2-FADS3
642.618	CE(16:0)_[M+NH4]1+	Sterol lipids (ST)	Sterols	Cholesteryl esters (CE)	rs174536	chr11:61551927	C / A	-0.0362	0.0056	7.123e-11	C11orf9	FADS1-FADS2-FADS3
664.603	CE(18:3)_[M+NH4]1+	Sterol lipids (ST)	Sterols	Cholesteryl esters (CE)	rs174536	chr11:61551927	C / A	-0.0685	0.0081	1.977e-17	C11orf9	FADS1-FADS2-FADS3
671.466	PA(34:2)_[M-H]1-	Glycerophospholipids (GP)	Glycerophosphates	Phosphatidates (PA)	rs174536	chr11:61551927	C / A	0.0618	0.01	5.924e-10	C11orf9	FADS1-FADS2-FADS3
688.603	CE(20:5)_[M+NH4]1+	Sterol lipids (ST)	Sterols	Cholesteryl esters (CE)	rs174536	chr11:61551927	C / A	-0.1926	0.0138	4.922e-44	C11orf9	FADS1-FADS2-FADS3
690.618	CE(20:4)_[M+NH4]1+	Sterol lipids (ST)	Sterols	Cholesteryl esters (CE)	rs174536	chr11:61551927	C / A	-0.1822	0.0085	7.34e-102	C11orf9	FADS1-FADS2-FADS3
716.523	PE(34:2)_[M+H]1+	Glycerophospholipids (GP)	Glycerophosphoethanolamines	Phosphatidylethanolamines (PE)	rs174536	chr11:61551927	C / A	0.125	0.0115	2.19e-27	C11orf9	FADS1-FADS2-FADS3
734.57	PC(32:0)_[M+H]1+ / PE(35:0)_[M+H]1+ / PA(37:1)_[M+NH4]1+	Glycerophospholipids (GP)	Glycerophosphocholines	Phosphatidylcholines (PC)	rs174536	chr11:61551927	C / A	-0.0449	0.0052	4.813e-18	C11orf9	FADS1-FADS2-FADS3
742.539	PC(33:3)_[M+H]1+ / PE(36:3)_[M+H]1+ / PA(38:4)_[M+NH4]1+	Glycerophospholipids (GP)	Glycerophosphocholines	Phosphatidylcholines (PC)	rs174536	chr11:61551927	C / A	0.1158	0.0117	3.461e-23	C11orf9	FADS1-FADS2-FADS3
744.554	PC(33:2)_[M+H]1+ / PE(36:2)_[M+H]1+ / PA(38:3)_[M+NH4]1+	Glycerophospholipids (GP)	Glycerophosphocholines	Phosphatidylcholines (PC)	rs174536	chr11:61551927	C / A	0.0712	0.0063	7.165e-30	C11orf9	FADS1-FADS2-FADS3
745.575	PA(39:1)_[M+H]1+	Glycerophospholipids (GP)	Glycerophosphates	Phosphatidates (PA)	rs174536	chr11:61551927	C / A	0.0651	0.0059	5.596e-28	C11orf9	FADS1-FADS2-FADS3
749.534	PG(34:0)_[M-H]1-	Glycerophospholipids (GP)	Glycerophosphoglycerols	Phosphatidylglycerols (PG)	rs174536	chr11:61551927	C / A	-0.0642	0.0075	1.103e-17	C11orf9	FADS1-FADS2-FADS3
750.544	PE-O(38:6)_[M+H]1+ / PC-P(35:5)_[M+H]1+	Glycerophospholipids (GP)	Glycerophosphoethanolamines	Phosphatidylethanolamines (PE)	rs174536	chr11:61551927	C / A	-0.0745	0.0082	1.6e-19	C11orf9	FADS1-FADS2-FADS3
752.559	PE-O(38:4)_[M-H]1- / PC-O(35:4)_[M-H]1- / PC-P(35:3)_[M-H]1-	Glycerophospholipids (GP)	Glycerophosphoethanolamines	Phosphatidylethanolamines (PE)	rs174536	chr11:61551927	C / A	-0.0963	0.0089	4.453e-27	C11orf9	FADS1-FADS2-FADS3
757.502	PG(35:3)_[M-H]1-	Glycerophospholipids (GP)	Glycerophosphoglycerols	Phosphatidylglycerols (PG)	rs174536	chr11:61551927	C / A	0.0533	0.0079	1.368e-11	C11orf9	FADS1-FADS2-FADS3
758.57	PC(34:2)_[M+H]1+ / PE(37:2)_[M+H]1+ / PA(39:3)_[M+NH4]1+	Glycerophospholipids (GP)	Glycerophosphocholines	Phosphatidylcholines (PC)	rs174536	chr11:61551927	C / A	0.0396	0.0043	4.212e-20	C11orf9	FADS1-FADS2-FADS3
764.524	PE(38:5)_[M-H]1-	Glycerophospholipids (GP)	Glycerophosphoethanolamines	Phosphatidylethanolamines (PE)	rs174536	chr11:61551927	C / A	-0.0936	0.0094	3.725e-23	C11orf9	FADS1-FADS2-FADS3
766.574	PC-O(36:5)_[M+H]1+ / PC-P(36:4)_[M+H]1+	Glycerophospholipids (GP)	Glycerophosphocholines	Phosphatidylcholines (PC)	rs174536	chr11:61551927	C / A	-0.1174	0.0066	3.646e-71	C11orf9	FADS1-FADS2-FADS3
768.554	PC(35:4)_[M+H]1+ / PE(38:4)_[M+H]1+ / PA(40:5)_[M+NH4]1+	Glycerophospholipids (GP)	Glycerophosphocholines	Phosphatidylcholines (PC)	rs174536	chr11:61551927	C / A	-0.0929	0.0069	1.958e-41	C11orf9	FADS1-FADS2-FADS3
770.57	PC(35:3)_[M+H]1+ / PE(38:3)_[M+H]1+ / PA(40:4)_[M+NH4]1+	Glycerophospholipids (GP)	Glycerophosphocholines	Phosphatidylcholines (PC)	rs174536	chr11:61551927	C / A	0.0664	0.0075	1.339e-18	C11orf9	FADS1-FADS2-FADS3
770.606	PC-O(36:3)_M+H]1+ / PC-P(36:2)_M+H]1+	Glycerophospholipids (GP)	Glycerophosphocholines	Phosphatidylcholines (PC)	rs174536	chr11:61551927	C / A	0.08	0.0074	6.836e-27	C11orf9	FADS1-FADS2-FADS3
771.59	PA(41:2)_[M+H]1+	Glycerophospholipids (GP)	Glycerophosphates	Phosphatidates (PA)	rs174536	chr11:61551927	C / A	0.0836	0.0104	6.607e-16	C11orf9	FADS1-FADS2-FADS3
777.565	PG(36:0)_[M-H]1-	Glycerophospholipids (GP)	Glycerophosphoglycerols	Phosphatidylglycerols (PG)	rs174536	chr11:61551927	C / A	-0.0542	0.0062	3.339e-18	C11orf9	FADS1-FADS2-FADS3
784.586	PC(36:3)_[M+H]1+ / PE(39:3)_[M+H]1+ / PA(41:4)_[M+NH4]1+	Glycerophospholipids (GP)	Glycerophosphocholines	Phosphatidylcholines (PC)	rs174536	chr11:61551927	C / A	0.0658	0.0041	1.127e-57	C11orf9	FADS1-FADS2-FADS3
786.601	PC(36:2)_[M+H]1+ / PE(39:2)_[M+H]1+ / PA(41:3)_[M+NH4]1+	Glycerophospholipids (GP)	Glycerophosphocholines	Phosphatidylcholines (PC)	rs174536	chr11:61551927	C / A	0.0293	0.0042	3.014e-12	C11orf9	FADS1-FADS2-FADS3
793.575	PA(43:4)_[M-H]1-	Glycerophospholipids (GP)	Glycerophosphates	Phosphatidates (PA)	rs174536	chr11:61551927	C / A	-0.0856	0.0073	1.615e-31	C11orf9	FADS1-FADS2-FADS3
794.606	PC-O(38:5)_[M+H]1+ / PC-P(38:4)_[M+H]1+	Glycerophospholipids (GP)	Glycerophosphocholines	Phosphatidylcholines (PC)	rs174536	chr11:61551927	C / A	-0.085	0.0065	1.772e-39	C11orf9	FADS1-FADS2-FADS3
796.586	PC(37:4)_[M+H]1+ / PE(40:4)_[M+H]1+ / PA(42:5)_[M+NH4]1+	Glycerophospholipids (GP)	Glycerophosphocholines	Phosphatidylcholines (PC)	rs174536	chr11:61551927	C / A	-0.1399	0.0094	2.138e-50	C11orf9	FADS1-FADS2-FADS3
798.601	PC(37:4)_[M+H]1+ / PE(40:3)_[M+H]1+	Glycerophospholipids (GP)	Glycerophosphocholines	Phosphatidylcholines (PC)	rs174536	chr11:61551927	C / A	0.063	0.0081	5.394e-15	C11orf9	FADS1-FADS2-FADS3
808.585	PC(38:5)_[M+H]1+ / PE(41:5)_[M+H]1+ / PA(43:6)_[M+NH4]1+	Glycerophospholipids (GP)	Glycerophosphocholines	Phosphatidylcholines (PC)	rs174536	chr11:61551927	C / A	-0.0765	0.0055	3.985e-44	C11orf9	FADS1-FADS2-FADS3
810.601	PC(38:4)_[M+H]1+ / PE(41:4)_[M+H]1+	Glycerophospholipids (GP)	Glycerophosphocholines	Phosphatidylcholines (PC)	rs174536	chr11:61551927	C / A	-0.1371	0.0063	3.09e-105	C11orf9	FADS1-FADS2-FADS3
812.617	PC(38:3)_[M+H]1+ / PE(41:3)_[M+H]1+ / PA(43:4)_[M+NH4]1+	Glycerophospholipids (GP)	Glycerophosphocholines	Phosphatidylcholines (PC)	rs174536	chr11:61551927	C / A	0.0546	0.0064	2.09e-17	C11orf9	FADS1-FADS2-FADS3
820.621	PC-O(40:6)_[M+H]1+ / PC-P(40:5)_[M+H]1+	Glycerophospholipids (GP)	Glycerophosphocholines	Phosphatidylcholines (PC)	rs174536	chr11:61551927	C / A	-0.0555	0.0067	1.927e-16	C11orf9	FADS1-FADS2-FADS3
822.637	PC-O(40:5)_[M+H]1+ / PC-P(40:4)_[M+H]1+	Glycerophospholipids (GP)	Glycerophosphocholines	Phosphatidylcholines (PC)	rs174536	chr11:61551927	C / A	-0.0722	0.0072	9.207e-24	C11orf9	FADS1-FADS2-FADS3
825.592	SM(44:9)_[M+H]1-	Sphingolipids (SP)	Phosphosphingolipids	Sphingomyelins (SM)	rs174536	chr11:61551927	C / A	-0.1406	0.008	7.416e-69	C11orf9	FADS1-FADS2-FADS3
832.535	PS(35:2) _[M+OAc]1-	Glycerophospholipids (GP)	Glycerophosphoserines	Phosphatidylserines (PS)	rs174536	chr11:61551927	C / A	-0.1362	0.0213	1.718e-10	C11orf9	FADS1-FADS2-FADS3
833.519	PI(34:2)_[M-H]1-	Glycerophospholipids (GP)	Glycerophosphoinositols	Phosphatidylinositols (PI)	rs174536	chr11:61551927	C / A	0.059	0.0086	8.068e-12	C11orf9	FADS1-FADS2-FADS3
834.601	PC(40:6)_[M+H]1+ / PE(43:6)_[M+H]1+	Glycerophospholipids (GP)	Glycerophosphocholines	Phosphatidylcholines (PC)	rs174536	chr11:61551927	C / A	-0.0714	0.0081	1.095e-18	C11orf9	FADS1-FADS2-FADS3
836.616	PC(40:5)_[M+H]1+	Glycerophospholipids (GP)	Glycerophosphocholines	Phosphatidylcholines (PC)	rs174536	chr11:61551927	C / A	-0.101	0.0073	1.463e-43	C11orf9	FADS1-FADS2-FADS3
838.56	PC(36:5)_[M+OAc]1- / PS(40:4)_[M-H]1-	Glycerophospholipids (GP)	Glycerophosphocholines	Phosphatidylcholines (PC)	rs174536	chr11:61551927	C / A	-0.1392	0.0128	1.606e-27	C11orf9	FADS1-FADS2-FADS3
842.592	PC(36:3)_[M+OAc]1- / PS(40:2)_[M-H]1-	Glycerophospholipids (GP)	Glycerophosphocholines	Phosphatidylcholines (PC)	rs174536	chr11:61551927	C / A	0.0771	0.0063	3.2e-34	C11orf9	FADS1-FADS2-FADS3
851.602	PI-O(36:0)_[M-H]1- / PG(37:0)_[M+OAc]1-	Glycerophospholipids (GP)	Glycerophosphoinositols	Phosphatidylinositols (PI)	rs174536	chr11:61551927	C / A	-0.0773	0.0083	1.415e-20	C11orf9	FADS1-FADS2-FADS3
857.519	PI(36:4)_[M-H]1-	Glycerophospholipids (GP)	Glycerophosphoinositols	Phosphatidylinositols (PI)	rs174536	chr11:61551927	C / A	-0.0627	0.0085	1.419e-13	C11orf9	FADS1-FADS2-FADS3
861.55	PI(36:2)_[M-H]1-	Glycerophospholipids (GP)	Glycerophosphoinositols	Phosphatidylinositols (PI)	rs174536	chr11:61551927	C / A	0.0621	0.0074	4.892e-17	C11orf9	FADS1-FADS2-FADS3
868.607	PC(38:4)_[M+OAc]1- / PS(42:3)_[M-H]1-	Glycerophospholipids (GP)	Glycerophosphocholines	Phosphatidylcholines (PC)	rs174536	chr11:61551927	C / A	-0.1334	0.0076	3.177e-68	C11orf9	FADS1-FADS2-FADS3
870.623	PC(38:3)_[M+OAc]1- / PS(42:2)_[M-H]1-	Glycerophospholipids (GP)	Glycerophosphocholines	Phosphatidylcholines (PC)	rs174536	chr11:61551927	C / A	0.0729	0.0084	5.548e-18	C11orf9	FADS1-FADS2-FADS3
885.55	PI(38:4)_[M-H]1-	Glycerophospholipids (GP)	Glycerophosphoinositols	Phosphatidylinositols (PI)	rs174536	chr11:61551927	C / A	-0.0692	0.0066	1.103e-25	C11orf9	FADS1-FADS2-FADS3
894.623	PC(40:5)_[M+OAc]1- / PS(44:4)_[M-H]1-	Glycerophospholipids (GP)	Glycerophosphocholines	Phosphatidylcholines (PC)	rs174536	chr11:61551927	C / A	-0.0912	0.008	3.87e-30	C11orf9	FADS1-FADS2-FADS3
896.639	PC(40:4)_[M+OAc]1- / PS(44:3)_[M-H]1-	Glycerophospholipids (GP)	Glycerophosphocholines	Phosphatidylcholines (PC)	rs174536	chr11:61551927	C / A	-0.0892	0.0101	9.297e-19	C11orf9	FADS1-FADS2-FADS3
902.817	TG(54:3)_[M+NH4]1+	Glycerolipids (GL)	Triradylglycerols	Triacylglycerols (TG)	rs174536	chr11:61551927	C / A	0.059	0.0093	2e-10	C11orf9	FADS1-FADS2-FADS3
920.566	PS(42:7)_[M+OAc]1-	Glycerophospholipids (GP)	Glycerophosphoserines	Phosphatidylserines (PS)	rs174536	chr11:61551927	C / A	-0.1707	0.0212	7.749e-16	C11orf9	FADS1-FADS2-FADS3
922.785	TG(56:7)_[M+NH4]1+	Glycerolipids (GL)	Triradylglycerols	Triacylglycerols (TG)	rs174536	chr11:61551927	C / A	-0.0795	0.0114	2.777e-12	C11orf9	FADS1-FADS2-FADS3
923.587	PI(36:1)_[M+OAc]1-	Glycerophospholipids (GP)	Glycerophosphoinositols	Phosphatidylinositols (PI)	rs174536	chr11:61551927	C / A	-0.1244	0.0105	2.136e-32	C11orf9	FADS1-FADS2-FADS3
924.597	PS(42:5)_[M+OAc]1-	Glycerophospholipids (GP)	Glycerophosphoserines	Phosphatidylserines (PS)	rs174536	chr11:61551927	C / A	0.0802	0.0094	1.47e-17	C11orf9	FADS1-FADS2-FADS3
924.67	PC(42:4)_[M+OAc]1-	Glycerophospholipids (GP)	Glycerophosphocholines	Phosphatidylcholines (PC)	rs174536	chr11:61551927	C / A	-0.1189	0.0107	1.311e-28	C11orf9	FADS1-FADS2-FADS3
924.801	TG(56:6)_[M+NH4]1+	Glycerolipids (GL)	Triradylglycerols	Triacylglycerols (TG)	rs174536	chr11:61551927	C / A	-0.0779	0.0093	3.976e-17	C11orf9	FADS1-FADS2-FADS3
925.602	PI(36:0)_[M+OAc]1-	Glycerophospholipids (GP)	Glycerophosphoinositols	Phosphatidylinositols (PI)	rs174536	chr11:61551927	C / A	0.0772	0.01	1.545e-14	C11orf9	FADS1-FADS2-FADS3
928.833	TG(56:4)_[M+NH4]1+	Glycerolipids (GL)	Triradylglycerols	Triacylglycerols (TG)	rs174536	chr11:61551927	C / A	0.0815	0.012	1.308e-11	C11orf9	FADS1-FADS2-FADS3
946.785	TG(58:9)_[M+NH4]1+	Glycerolipids (GL)	Triradylglycerols	Triacylglycerols (TG)	rs174536	chr11:61551927	C / A	-0.1687	0.0214	2.947e-15	C11orf9	FADS1-FADS2-FADS3
950.613	PS(44:6)_[M+OAc]1-	Glycerophospholipids (GP)	Glycerophosphoserines	Phosphatidylserines (PS)	rs174536	chr11:61551927	C / A	-0.135	0.0113	6.908e-33	C11orf9	FADS1-FADS2-FADS3
303.233	FA(20:4)_[M-H]1-	Fatty acyls (FA)	Fatty acids and conjugates	Free fatty acids (FA)	rs174537	chr11:61552680	T / G	-0.1019	0.0077	6.482e-40	C11orf9	FADS1-FADS2-FADS3
329.249	FA(22:5)_[M-H]1-	Fatty acyls (FA)	Fatty acids and conjugates	Free fatty acids (FA)	rs174537	chr11:61552680	T / G	-0.0707	0.0101	2.556e-12	C11orf9	FADS1-FADS2-FADS3
331.264	FA(22:4)_[M-H]1-	Fatty acyls (FA)	Fatty acids and conjugates	Free fatty acids (FA)	rs174537	chr11:61552680	T / G	-0.0928	0.0104	4.116e-19	C11orf9	FADS1-FADS2-FADS3
544.34	LPC(20:4)_[M+H]1+	Glycerophospholipids (GP)	Glycerophosphocholines	Lysophosphatidylcholines (LPC)	rs174537	chr11:61552680	T / G	-0.1252	0.0102	1.513e-34	C11orf9	FADS1-FADS2-FADS3
601.519	DG(36:3)_[M+H-H2O]1+	Glycerolipids (GL)	Diradylglycerols	Diacylglycerols (DG)	rs174537	chr11:61552680	T / G	0.0611	0.0092	3.174e-11	C11orf9	FADS1-FADS2-FADS3
603.535	DG(36:2)_[M+H-H2O]1+	Glycerolipids (GL)	Diradylglycerols	Diacylglycerols (DG)	rs174537	chr11:61552680	T / G	0.0485	0.0078	5.216e-10	C11orf9	FADS1-FADS2-FADS3
642.618	CE(16:0)_[M+NH4]1+	Sterol lipids (ST)	Sterols	Cholesteryl esters (CE)	rs174537	chr11:61552680	T / G	-0.036	0.0056	8.782e-11	C11orf9	FADS1-FADS2-FADS3
664.603	CE(18:3)_[M+NH4]1+	Sterol lipids (ST)	Sterols	Cholesteryl esters (CE)	rs174537	chr11:61552680	T / G	-0.0686	0.0081	1.856e-17	C11orf9	FADS1-FADS2-FADS3
671.466	PA(34:2)_[M-H]1-	Glycerophospholipids (GP)	Glycerophosphates	Phosphatidates (PA)	rs174537	chr11:61552680	T / G	0.0616	0.01	6.805e-10	C11orf9	FADS1-FADS2-FADS3
688.603	CE(20:5)_[M+NH4]1+	Sterol lipids (ST)	Sterols	Cholesteryl esters (CE)	rs174537	chr11:61552680	T / G	-0.1922	0.0138	5.153e-44	C11orf9	FADS1-FADS2-FADS3
690.618	CE(20:4)_[M+NH4]1+	Sterol lipids (ST)	Sterols	Cholesteryl esters (CE)	rs174537	chr11:61552680	T / G	-0.1814	0.0085	5.05e-101	C11orf9	FADS1-FADS2-FADS3
716.523	PE(34:2)_[M+H]1+	Glycerophospholipids (GP)	Glycerophosphoethanolamines	Phosphatidylethanolamines (PE)	rs174537	chr11:61552680	T / G	0.1241	0.0115	4.119e-27	C11orf9	FADS1-FADS2-FADS3
734.57	PC(32:0)_[M+H]1+ / PE(35:0)_[M+H]1+ / PA(37:1)_[M+NH4]1+	Glycerophospholipids (GP)	Glycerophosphocholines	Phosphatidylcholines (PC)	rs174537	chr11:61552680	T / G	-0.045	0.0052	4.498e-18	C11orf9	FADS1-FADS2-FADS3
742.539	PC(33:3)_[M+H]1+ / PE(36:3)_[M+H]1+ / PA(38:4)_[M+NH4]1+	Glycerophospholipids (GP)	Glycerophosphocholines	Phosphatidylcholines (PC)	rs174537	chr11:61552680	T / G	0.1153	0.0117	4.681e-23	C11orf9	FADS1-FADS2-FADS3
744.554	PC(33:2)_[M+H]1+ / PE(36:2)_[M+H]1+ / PA(38:3)_[M+NH4]1+	Glycerophospholipids (GP)	Glycerophosphocholines	Phosphatidylcholines (PC)	rs174537	chr11:61552680	T / G	0.0709	0.0062	7.433e-30	C11orf9	FADS1-FADS2-FADS3
745.575	PA(39:1)_[M+H]1+	Glycerophospholipids (GP)	Glycerophosphates	Phosphatidates (PA)	rs174537	chr11:61552680	T / G	0.0646	0.0059	7.971e-28	C11orf9	FADS1-FADS2-FADS3
749.534	PG(34:0)_[M-H]1-	Glycerophospholipids (GP)	Glycerophosphoglycerols	Phosphatidylglycerols (PG)	rs174537	chr11:61552680	T / G	-0.0637	0.0075	1.505e-17	C11orf9	FADS1-FADS2-FADS3
750.544	PE-O(38:6)_[M+H]1+ / PC-P(35:5)_[M+H]1+	Glycerophospholipids (GP)	Glycerophosphoethanolamines	Phosphatidylethanolamines (PE)	rs174537	chr11:61552680	T / G	-0.074	0.0082	2.186e-19	C11orf9	FADS1-FADS2-FADS3
752.559	PE-O(38:4)_[M-H]1- / PC-O(35:4)_[M-H]1- / PC-P(35:3)_[M-H]1-	Glycerophospholipids (GP)	Glycerophosphoethanolamines	Phosphatidylethanolamines (PE)	rs174537	chr11:61552680	T / G	-0.0956	0.0089	9.932e-27	C11orf9	FADS1-FADS2-FADS3
758.57	PC(34:2)_[M+H]1+ / PE(37:2)_[M+H]1+ / PA(39:3)_[M+NH4]1+	Glycerophospholipids (GP)	Glycerophosphocholines	Phosphatidylcholines (PC)	rs174537	chr11:61552680	T / G	0.0394	0.0043	6.081e-20	C11orf9	FADS1-FADS2-FADS3
764.524	PE(38:5)_[M-H]1-	Glycerophospholipids (GP)	Glycerophosphoethanolamines	Phosphatidylethanolamines (PE)	rs174537	chr11:61552680	T / G	-0.0934	0.0094	3.27e-23	C11orf9	FADS1-FADS2-FADS3
766.574	PC-O(36:5)_[M+H]1+ / PC-P(36:4)_[M+H]1+	Glycerophospholipids (GP)	Glycerophosphocholines	Phosphatidylcholines (PC)	rs174537	chr11:61552680	T / G	-0.1168	0.0066	6.515e-71	C11orf9	FADS1-FADS2-FADS3
768.554	PC(35:4)_[M+H]1+ / PE(38:4)_[M+H]1+ / PA(40:5)_[M+NH4]1+	Glycerophospholipids (GP)	Glycerophosphocholines	Phosphatidylcholines (PC)	rs174537	chr11:61552680	T / G	-0.0927	0.0069	1.785e-41	C11orf9	FADS1-FADS2-FADS3
770.606	PC-O(36:3)_M+H]1+ / PC-P(36:2)_M+H]1+	Glycerophospholipids (GP)	Glycerophosphocholines	Phosphatidylcholines (PC)	rs174537	chr11:61552680	T / G	0.0794	0.0074	1.117e-26	C11orf9	FADS1-FADS2-FADS3
771.59	PA(41:2)_[M+H]1+	Glycerophospholipids (GP)	Glycerophosphates	Phosphatidates (PA)	rs174537	chr11:61552680	T / G	0.0832	0.0103	8.261e-16	C11orf9	FADS1-FADS2-FADS3
777.565	PG(36:0)_[M-H]1-	Glycerophospholipids (GP)	Glycerophosphoglycerols	Phosphatidylglycerols (PG)	rs174537	chr11:61552680	T / G	-0.054	0.0062	4.696e-18	C11orf9	FADS1-FADS2-FADS3
784.586	PC(36:3)_[M+H]1+ / PE(39:3)_[M+H]1+ / PA(41:4)_[M+NH4]1+	Glycerophospholipids (GP)	Glycerophosphocholines	Phosphatidylcholines (PC)	rs174537	chr11:61552680	T / G	0.0652	0.0041	2.558e-57	C11orf9	FADS1-FADS2-FADS3
786.601	PC(36:2)_[M+H]1+ / PE(39:2)_[M+H]1+ / PA(41:3)_[M+NH4]1+	Glycerophospholipids (GP)	Glycerophosphocholines	Phosphatidylcholines (PC)	rs174537	chr11:61552680	T / G	0.0291	0.0042	3.385e-12	C11orf9	FADS1-FADS2-FADS3
793.575	PA(43:4)_[M-H]1-	Glycerophospholipids (GP)	Glycerophosphates	Phosphatidates (PA)	rs174537	chr11:61552680	T / G	-0.0855	0.0073	1.274e-31	C11orf9	FADS1-FADS2-FADS3
794.606	PC-O(38:5)_[M+H]1+ / PC-P(38:4)_[M+H]1+	Glycerophospholipids (GP)	Glycerophosphocholines	Phosphatidylcholines (PC)	rs174537	chr11:61552680	T / G	-0.0847	0.0064	1.618e-39	C11orf9	FADS1-FADS2-FADS3
796.586	PC(37:4)_[M+H]1+ / PE(40:4)_[M+H]1+ / PA(42:5)_[M+NH4]1+	Glycerophospholipids (GP)	Glycerophosphocholines	Phosphatidylcholines (PC)	rs174537	chr11:61552680	T / G	-0.1392	0.0093	3.826e-50	C11orf9	FADS1-FADS2-FADS3
798.601	PC(37:4)_[M+H]1+ / PE(40:3)_[M+H]1+	Glycerophospholipids (GP)	Glycerophosphocholines	Phosphatidylcholines (PC)	rs174537	chr11:61552680	T / G	0.0629	0.0081	6.111e-15	C11orf9	FADS1-FADS2-FADS3
808.585	PC(38:5)_[M+H]1+ / PE(41:5)_[M+H]1+ / PA(43:6)_[M+NH4]1+	Glycerophospholipids (GP)	Glycerophosphocholines	Phosphatidylcholines (PC)	rs174537	chr11:61552680	T / G	-0.0761	0.0055	4.868e-44	C11orf9	FADS1-FADS2-FADS3
810.601	PC(38:4)_[M+H]1+ / PE(41:4)_[M+H]1+	Glycerophospholipids (GP)	Glycerophosphocholines	Phosphatidylcholines (PC)	rs174537	chr11:61552680	T / G	-0.1367	0.0063	1.5e-104	C11orf9	FADS1-FADS2-FADS3
812.617	PC(38:3)_[M+H]1+ / PE(41:3)_[M+H]1+ / PA(43:4)_[M+NH4]1+	Glycerophospholipids (GP)	Glycerophosphocholines	Phosphatidylcholines (PC)	rs174537	chr11:61552680	T / G	0.0542	0.0064	2.603e-17	C11orf9	FADS1-FADS2-FADS3
820.621	PC-O(40:6)_[M+H]1+ / PC-P(40:5)_[M+H]1+	Glycerophospholipids (GP)	Glycerophosphocholines	Phosphatidylcholines (PC)	rs174537	chr11:61552680	T / G	-0.0553	0.0067	2.5e-16	C11orf9	FADS1-FADS2-FADS3
822.637	PC-O(40:5)_[M+H]1+ / PC-P(40:4)_[M+H]1+	Glycerophospholipids (GP)	Glycerophosphocholines	Phosphatidylcholines (PC)	rs174537	chr11:61552680	T / G	-0.072	0.0072	8.11e-24	C11orf9	FADS1-FADS2-FADS3
825.592	SM(44:9)_[M+H]1-	Sphingolipids (SP)	Phosphosphingolipids	Sphingomyelins (SM)	rs174537	chr11:61552680	T / G	-0.1401	0.008	2.222e-68	C11orf9	FADS1-FADS2-FADS3
832.535	PS(35:2) _[M+OAc]1-	Glycerophospholipids (GP)	Glycerophosphoserines	Phosphatidylserines (PS)	rs174537	chr11:61552680	T / G	-0.1346	0.0213	2.529e-10	C11orf9	FADS1-FADS2-FADS3
833.519	PI(34:2)_[M-H]1-	Glycerophospholipids (GP)	Glycerophosphoinositols	Phosphatidylinositols (PI)	rs174537	chr11:61552680	T / G	0.0588	0.0086	7.989e-12	C11orf9	FADS1-FADS2-FADS3
834.601	PC(40:6)_[M+H]1+ / PE(43:6)_[M+H]1+	Glycerophospholipids (GP)	Glycerophosphocholines	Phosphatidylcholines (PC)	rs174537	chr11:61552680	T / G	-0.0712	0.0081	1.165e-18	C11orf9	FADS1-FADS2-FADS3
836.616	PC(40:5)_[M+H]1+	Glycerophospholipids (GP)	Glycerophosphocholines	Phosphatidylcholines (PC)	rs174537	chr11:61552680	T / G	-0.1007	0.0073	1.362e-43	C11orf9	FADS1-FADS2-FADS3
838.56	PC(36:5)_[M+OAc]1- / PS(40:4)_[M-H]1-	Glycerophospholipids (GP)	Glycerophosphocholines	Phosphatidylcholines (PC)	rs174537	chr11:61552680	T / G	-0.1389	0.0128	1.649e-27	C11orf9	FADS1-FADS2-FADS3
842.592	PC(36:3)_[M+OAc]1- / PS(40:2)_[M-H]1-	Glycerophospholipids (GP)	Glycerophosphocholines	Phosphatidylcholines (PC)	rs174537	chr11:61552680	T / G	0.0769	0.0063	2.634e-34	C11orf9	FADS1-FADS2-FADS3
851.602	PI-O(36:0)_[M-H]1- / PG(37:0)_[M+OAc]1-	Glycerophospholipids (GP)	Glycerophosphoinositols	Phosphatidylinositols (PI)	rs174537	chr11:61552680	T / G	-0.077	0.0083	1.714e-20	C11orf9	FADS1-FADS2-FADS3
857.519	PI(36:4)_[M-H]1-	Glycerophospholipids (GP)	Glycerophosphoinositols	Phosphatidylinositols (PI)	rs174537	chr11:61552680	T / G	-0.0628	0.0085	1.212e-13	C11orf9	FADS1-FADS2-FADS3
861.55	PI(36:2)_[M-H]1-	Glycerophospholipids (GP)	Glycerophosphoinositols	Phosphatidylinositols (PI)	rs174537	chr11:61552680	T / G	0.0618	0.0074	6.638e-17	C11orf9	FADS1-FADS2-FADS3
868.607	PC(38:4)_[M+OAc]1- / PS(42:3)_[M-H]1-	Glycerophospholipids (GP)	Glycerophosphocholines	Phosphatidylcholines (PC)	rs174537	chr11:61552680	T / G	-0.1327	0.0076	4.947e-68	C11orf9	FADS1-FADS2-FADS3
870.623	PC(38:3)_[M+OAc]1- / PS(42:2)_[M-H]1-	Glycerophospholipids (GP)	Glycerophosphocholines	Phosphatidylcholines (PC)	rs174537	chr11:61552680	T / G	0.0725	0.0084	6.377e-18	C11orf9	FADS1-FADS2-FADS3
885.55	PI(38:4)_[M-H]1-	Glycerophospholipids (GP)	Glycerophosphoinositols	Phosphatidylinositols (PI)	rs174537	chr11:61552680	T / G	-0.0691	0.0066	9.4e-26	C11orf9	FADS1-FADS2-FADS3
894.623	PC(40:5)_[M+OAc]1- / PS(44:4)_[M-H]1-	Glycerophospholipids (GP)	Glycerophosphocholines	Phosphatidylcholines (PC)	rs174537	chr11:61552680	T / G	-0.091	0.008	3.629e-30	C11orf9	FADS1-FADS2-FADS3
896.639	PC(40:4)_[M+OAc]1- / PS(44:3)_[M-H]1-	Glycerophospholipids (GP)	Glycerophosphocholines	Phosphatidylcholines (PC)	rs174537	chr11:61552680	T / G	-0.089	0.0101	9.23e-19	C11orf9	FADS1-FADS2-FADS3
902.817	TG(54:3)_[M+NH4]1+	Glycerolipids (GL)	Triradylglycerols	Triacylglycerols (TG)	rs174537	chr11:61552680	T / G	0.0588	0.0093	2.109e-10	C11orf9	FADS1-FADS2-FADS3
920.566	PS(42:7)_[M+OAc]1-	Glycerophospholipids (GP)	Glycerophosphoserines	Phosphatidylserines (PS)	rs174537	chr11:61552680	T / G	-0.17	0.0212	9.091e-16	C11orf9	FADS1-FADS2-FADS3
922.785	TG(56:7)_[M+NH4]1+	Glycerolipids (GL)	Triradylglycerols	Triacylglycerols (TG)	rs174537	chr11:61552680	T / G	-0.0789	0.0114	3.68e-12	C11orf9	FADS1-FADS2-FADS3
923.587	PI(36:1)_[M+OAc]1-	Glycerophospholipids (GP)	Glycerophosphoinositols	Phosphatidylinositols (PI)	rs174537	chr11:61552680	T / G	-0.1235	0.0105	3.886e-32	C11orf9	FADS1-FADS2-FADS3
924.597	PS(42:5)_[M+OAc]1-	Glycerophospholipids (GP)	Glycerophosphoserines	Phosphatidylserines (PS)	rs174537	chr11:61552680	T / G	0.0801	0.0094	1.324e-17	C11orf9	FADS1-FADS2-FADS3
924.67	PC(42:4)_[M+OAc]1-	Glycerophospholipids (GP)	Glycerophosphocholines	Phosphatidylcholines (PC)	rs174537	chr11:61552680	T / G	-0.1187	0.0107	1.25e-28	C11orf9	FADS1-FADS2-FADS3
924.801	TG(56:6)_[M+NH4]1+	Glycerolipids (GL)	Triradylglycerols	Triacylglycerols (TG)	rs174537	chr11:61552680	T / G	-0.0774	0.0093	6.458e-17	C11orf9	FADS1-FADS2-FADS3
925.602	PI(36:0)_[M+OAc]1-	Glycerophospholipids (GP)	Glycerophosphoinositols	Phosphatidylinositols (PI)	rs174537	chr11:61552680	T / G	0.0771	0.01	1.441e-14	C11orf9	FADS1-FADS2-FADS3
928.833	TG(56:4)_[M+NH4]1+	Glycerolipids (GL)	Triradylglycerols	Triacylglycerols (TG)	rs174537	chr11:61552680	T / G	0.0813	0.012	1.327e-11	C11orf9	FADS1-FADS2-FADS3
946.785	TG(58:9)_[M+NH4]1+	Glycerolipids (GL)	Triradylglycerols	Triacylglycerols (TG)	rs174537	chr11:61552680	T / G	-0.1675	0.0213	4.278e-15	C11orf9	FADS1-FADS2-FADS3
950.613	PS(44:6)_[M+OAc]1-	Glycerophospholipids (GP)	Glycerophosphoserines	Phosphatidylserines (PS)	rs174537	chr11:61552680	T / G	-0.1342	0.0113	1.143e-32	C11orf9	FADS1-FADS2-FADS3
305.249	FA(20:3)_[M-H]1-	Fatty acyls (FA)	Fatty acids and conjugates	Free fatty acids (FA)	rs61896141	chr11:61556039	C / A	0.0882	0.0122	3.849e-13	C11orf9	FADS1-FADS2-FADS3
690.618	CE(20:4)_[M+NH4]1+	Sterol lipids (ST)	Sterols	Cholesteryl esters (CE)	rs61896141	chr11:61556039	C / A	-0.124	0.013	1.636e-21	C11orf9	FADS1-FADS2-FADS3
766.574	PC-O(36:5)_[M+H]1+ / PC-P(36:4)_[M+H]1+	Glycerophospholipids (GP)	Glycerophosphocholines	Phosphatidylcholines (PC)	rs61896141	chr11:61556039	C / A	-0.084	0.0101	1.202e-16	C11orf9	FADS1-FADS2-FADS3
768.554	PC(35:4)_[M+H]1+ / PE(38:4)_[M+H]1+ / PA(40:5)_[M+NH4]1+	Glycerophospholipids (GP)	Glycerophosphocholines	Phosphatidylcholines (PC)	rs61896141	chr11:61556039	C / A	-0.0672	0.0106	2.231e-10	C11orf9	FADS1-FADS2-FADS3
784.586	PC(36:3)_[M+H]1+ / PE(39:3)_[M+H]1+ / PA(41:4)_[M+NH4]1+	Glycerophospholipids (GP)	Glycerophosphocholines	Phosphatidylcholines (PC)	rs61896141	chr11:61556039	C / A	0.07	0.0063	9.3e-29	C11orf9	FADS1-FADS2-FADS3
794.606	PC-O(38:5)_[M+H]1+ / PC-P(38:4)_[M+H]1+	Glycerophospholipids (GP)	Glycerophosphocholines	Phosphatidylcholines (PC)	rs61896141	chr11:61556039	C / A	-0.0705	0.01	1.523e-12	C11orf9	FADS1-FADS2-FADS3
796.586	PC(37:4)_[M+H]1+ / PE(40:4)_[M+H]1+ / PA(42:5)_[M+NH4]1+	Glycerophospholipids (GP)	Glycerophosphocholines	Phosphatidylcholines (PC)	rs61896141	chr11:61556039	C / A	-0.098	0.0144	1.125e-11	C11orf9	FADS1-FADS2-FADS3
798.601	PC(37:4)_[M+H]1+ / PE(40:3)_[M+H]1+	Glycerophospholipids (GP)	Glycerophosphocholines	Phosphatidylcholines (PC)	rs61896141	chr11:61556039	C / A	0.0898	0.0124	5.028e-13	C11orf9	FADS1-FADS2-FADS3
808.585	PC(38:5)_[M+H]1+ / PE(41:5)_[M+H]1+ / PA(43:6)_[M+NH4]1+	Glycerophospholipids (GP)	Glycerophosphocholines	Phosphatidylcholines (PC)	rs61896141	chr11:61556039	C / A	-0.0546	0.0084	8.427e-11	C11orf9	FADS1-FADS2-FADS3
810.601	PC(38:4)_[M+H]1+ / PE(41:4)_[M+H]1+	Glycerophospholipids (GP)	Glycerophosphocholines	Phosphatidylcholines (PC)	rs61896141	chr11:61556039	C / A	-0.0937	0.0097	3.51e-22	C11orf9	FADS1-FADS2-FADS3
812.617	PC(38:3)_[M+H]1+ / PE(41:3)_[M+H]1+ / PA(43:4)_[M+NH4]1+	Glycerophospholipids (GP)	Glycerophosphocholines	Phosphatidylcholines (PC)	rs61896141	chr11:61556039	C / A	0.0898	0.0098	6.788e-20	C11orf9	FADS1-FADS2-FADS3
814.632	PC(38:2)_[M+H]1+ / PE(41:2)_[M+H]1+	Glycerophospholipids (GP)	Glycerophosphocholines	Phosphatidylcholines (PC)	rs61896141	chr11:61556039	C / A	0.076	0.0109	3.208e-12	C11orf9	FADS1-FADS2-FADS3
822.637	PC-O(40:5)_[M+H]1+ / PC-P(40:4)_[M+H]1+	Glycerophospholipids (GP)	Glycerophosphocholines	Phosphatidylcholines (PC)	rs61896141	chr11:61556039	C / A	-0.068	0.0111	7.514e-10	C11orf9	FADS1-FADS2-FADS3
825.592	SM(44:9)_[M+H]1-	Sphingolipids (SP)	Phosphosphingolipids	Sphingomyelins (SM)	rs61896141	chr11:61556039	C / A	-0.0965	0.0123	3.882e-15	C11orf9	FADS1-FADS2-FADS3
842.592	PC(36:3)_[M+OAc]1- / PS(40:2)_[M-H]1-	Glycerophospholipids (GP)	Glycerophosphocholines	Phosphatidylcholines (PC)	rs61896141	chr11:61556039	C / A	0.0823	0.0097	1.937e-17	C11orf9	FADS1-FADS2-FADS3
868.607	PC(38:4)_[M+OAc]1- / PS(42:3)_[M-H]1-	Glycerophospholipids (GP)	Glycerophosphocholines	Phosphatidylcholines (PC)	rs61896141	chr11:61556039	C / A	-0.0878	0.0117	6.071e-14	C11orf9	FADS1-FADS2-FADS3
870.623	PC(38:3)_[M+OAc]1- / PS(42:2)_[M-H]1-	Glycerophospholipids (GP)	Glycerophosphocholines	Phosphatidylcholines (PC)	rs61896141	chr11:61556039	C / A	0.1094	0.0129	2.238e-17	C11orf9	FADS1-FADS2-FADS3
303.233	FA(20:4)_[M-H]1-	Fatty acyls (FA)	Fatty acids and conjugates	Free fatty acids (FA)	rs102275	chr11:61557803	C / T	-0.1019	0.0077	2.254e-40	C11orf10	FADS1-FADS2-FADS3
329.249	FA(22:5)_[M-H]1-	Fatty acyls (FA)	Fatty acids and conjugates	Free fatty acids (FA)	rs102275	chr11:61557803	C / T	-0.0699	0.01	2.928e-12	C11orf10	FADS1-FADS2-FADS3
331.264	FA(22:4)_[M-H]1-	Fatty acyls (FA)	Fatty acids and conjugates	Free fatty acids (FA)	rs102275	chr11:61557803	C / T	-0.0926	0.0103	2.601e-19	C11orf10	FADS1-FADS2-FADS3
544.34	LPC(20:4)_[M+H]1+	Glycerophospholipids (GP)	Glycerophosphocholines	Lysophosphatidylcholines (LPC)	rs102275	chr11:61557803	C / T	-0.1251	0.0101	2.769e-35	C11orf10	FADS1-FADS2-FADS3
601.519	DG(36:3)_[M+H-H2O]1+	Glycerolipids (GL)	Diradylglycerols	Diacylglycerols (DG)	rs102275	chr11:61557803	C / T	0.0586	0.0091	1.067e-10	C11orf10	FADS1-FADS2-FADS3
603.535	DG(36:2)_[M+H-H2O]1+	Glycerolipids (GL)	Diradylglycerols	Diacylglycerols (DG)	rs102275	chr11:61557803	C / T	0.0477	0.0078	7.684e-10	C11orf10	FADS1-FADS2-FADS3
642.618	CE(16:0)_[M+NH4]1+	Sterol lipids (ST)	Sterols	Cholesteryl esters (CE)	rs102275	chr11:61557803	C / T	-0.0345	0.0055	3.922e-10	C11orf10	FADS1-FADS2-FADS3
664.603	CE(18:3)_[M+NH4]1+	Sterol lipids (ST)	Sterols	Cholesteryl esters (CE)	rs102275	chr11:61557803	C / T	-0.0648	0.0079	3.727e-16	C11orf10	FADS1-FADS2-FADS3
688.603	CE(20:5)_[M+NH4]1+	Sterol lipids (ST)	Sterols	Cholesteryl esters (CE)	rs102275	chr11:61557803	C / T	-0.1854	0.0137	8.966e-42	C11orf10	FADS1-FADS2-FADS3
690.618	CE(20:4)_[M+NH4]1+	Sterol lipids (ST)	Sterols	Cholesteryl esters (CE)	rs102275	chr11:61557803	C / T	-0.1781	0.0084	3.75e-100	C11orf10	FADS1-FADS2-FADS3
716.523	PE(34:2)_[M+H]1+	Glycerophospholipids (GP)	Glycerophosphoethanolamines	Phosphatidylethanolamines (PE)	rs102275	chr11:61557803	C / T	0.1228	0.0114	3.871e-27	C11orf10	FADS1-FADS2-FADS3
734.57	PC(32:0)_[M+H]1+ / PE(35:0)_[M+H]1+ / PA(37:1)_[M+NH4]1+	Glycerophospholipids (GP)	Glycerophosphocholines	Phosphatidylcholines (PC)	rs102275	chr11:61557803	C / T	-0.0447	0.0051	3.233e-18	C11orf10	FADS1-FADS2-FADS3
742.539	PC(33:3)_[M+H]1+ / PE(36:3)_[M+H]1+ / PA(38:4)_[M+NH4]1+	Glycerophospholipids (GP)	Glycerophosphocholines	Phosphatidylcholines (PC)	rs102275	chr11:61557803	C / T	0.1132	0.0116	1.146e-22	C11orf10	FADS1-FADS2-FADS3
744.554	PC(33:2)_[M+H]1+ / PE(36:2)_[M+H]1+ / PA(38:3)_[M+NH4]1+	Glycerophospholipids (GP)	Glycerophosphocholines	Phosphatidylcholines (PC)	rs102275	chr11:61557803	C / T	0.0695	0.0062	3.537e-29	C11orf10	FADS1-FADS2-FADS3
745.575	PA(39:1)_[M+H]1+	Glycerophospholipids (GP)	Glycerophosphates	Phosphatidates (PA)	rs102275	chr11:61557803	C / T	0.0629	0.0059	6.843e-27	C11orf10	FADS1-FADS2-FADS3
749.534	PG(34:0)_[M-H]1-	Glycerophospholipids (GP)	Glycerophosphoglycerols	Phosphatidylglycerols (PG)	rs102275	chr11:61557803	C / T	-0.0611	0.0074	1.723e-16	C11orf10	FADS1-FADS2-FADS3
750.544	PE-O(38:6)_[M+H]1+ / PC-P(35:5)_[M+H]1+	Glycerophospholipids (GP)	Glycerophosphoethanolamines	Phosphatidylethanolamines (PE)	rs102275	chr11:61557803	C / T	-0.0723	0.0081	5.195e-19	C11orf10	FADS1-FADS2-FADS3
752.559	PE-O(38:4)_[M-H]1- / PC-O(35:4)_[M-H]1- / PC-P(35:3)_[M-H]1-	Glycerophospholipids (GP)	Glycerophosphoethanolamines	Phosphatidylethanolamines (PE)	rs102275	chr11:61557803	C / T	-0.0935	0.0089	5.335e-26	C11orf10	FADS1-FADS2-FADS3
757.502	PG(35:3)_[M-H]1-	Glycerophospholipids (GP)	Glycerophosphoglycerols	Phosphatidylglycerols (PG)	rs102275	chr11:61557803	C / T	0.0525	0.0078	1.709e-11	C11orf10	FADS1-FADS2-FADS3
758.57	PC(34:2)_[M+H]1+ / PE(37:2)_[M+H]1+ / PA(39:3)_[M+NH4]1+	Glycerophospholipids (GP)	Glycerophosphocholines	Phosphatidylcholines (PC)	rs102275	chr11:61557803	C / T	0.038	0.0042	3.403e-19	C11orf10	FADS1-FADS2-FADS3
764.524	PE(38:5)_[M-H]1-	Glycerophospholipids (GP)	Glycerophosphoethanolamines	Phosphatidylethanolamines (PE)	rs102275	chr11:61557803	C / T	-0.09	0.0093	6.118e-22	C11orf10	FADS1-FADS2-FADS3
766.574	PC-O(36:5)_[M+H]1+ / PC-P(36:4)_[M+H]1+	Glycerophospholipids (GP)	Glycerophosphocholines	Phosphatidylcholines (PC)	rs102275	chr11:61557803	C / T	-0.1151	0.0065	6.441e-70	C11orf10	FADS1-FADS2-FADS3
768.554	PC(35:4)_[M+H]1+ / PE(38:4)_[M+H]1+ / PA(40:5)_[M+NH4]1+	Glycerophospholipids (GP)	Glycerophosphocholines	Phosphatidylcholines (PC)	rs102275	chr11:61557803	C / T	-0.0918	0.0068	2.779e-41	C11orf10	FADS1-FADS2-FADS3
770.57	PC(35:3)_[M+H]1+ / PE(38:3)_[M+H]1+ / PA(40:4)_[M+NH4]1+	Glycerophospholipids (GP)	Glycerophosphocholines	Phosphatidylcholines (PC)	rs102275	chr11:61557803	C / T	0.0661	0.0075	7.527e-19	C11orf10	FADS1-FADS2-FADS3
770.606	PC-O(36:3)_M+H]1+ / PC-P(36:2)_M+H]1+	Glycerophospholipids (GP)	Glycerophosphocholines	Phosphatidylcholines (PC)	rs102275	chr11:61557803	C / T	0.078	0.0074	2.774e-26	C11orf10	FADS1-FADS2-FADS3
771.59	PA(41:2)_[M+H]1+	Glycerophospholipids (GP)	Glycerophosphates	Phosphatidates (PA)	rs102275	chr11:61557803	C / T	0.0808	0.0103	3.318e-15	C11orf10	FADS1-FADS2-FADS3
777.565	PG(36:0)_[M-H]1-	Glycerophospholipids (GP)	Glycerophosphoglycerols	Phosphatidylglycerols (PG)	rs102275	chr11:61557803	C / T	-0.0515	0.0062	5.959e-17	C11orf10	FADS1-FADS2-FADS3
784.586	PC(36:3)_[M+H]1+ / PE(39:3)_[M+H]1+ / PA(41:4)_[M+NH4]1+	Glycerophospholipids (GP)	Glycerophosphocholines	Phosphatidylcholines (PC)	rs102275	chr11:61557803	C / T	0.0641	0.004	8.437e-57	C11orf10	FADS1-FADS2-FADS3
786.601	PC(36:2)_[M+H]1+ / PE(39:2)_[M+H]1+ / PA(41:3)_[M+NH4]1+	Glycerophospholipids (GP)	Glycerophosphocholines	Phosphatidylcholines (PC)	rs102275	chr11:61557803	C / T	0.0279	0.0041	1.541e-11	C11orf10	FADS1-FADS2-FADS3
793.575	PA(43:4)_[M-H]1-	Glycerophospholipids (GP)	Glycerophosphates	Phosphatidates (PA)	rs102275	chr11:61557803	C / T	-0.0845	0.0073	2.259e-31	C11orf10	FADS1-FADS2-FADS3
794.606	PC-O(38:5)_[M+H]1+ / PC-P(38:4)_[M+H]1+	Glycerophospholipids (GP)	Glycerophosphocholines	Phosphatidylcholines (PC)	rs102275	chr11:61557803	C / T	-0.0841	0.0064	1.362e-39	C11orf10	FADS1-FADS2-FADS3
796.586	PC(37:4)_[M+H]1+ / PE(40:4)_[M+H]1+ / PA(42:5)_[M+NH4]1+	Glycerophospholipids (GP)	Glycerophosphocholines	Phosphatidylcholines (PC)	rs102275	chr11:61557803	C / T	-0.1371	0.0093	1.96e-49	C11orf10	FADS1-FADS2-FADS3
798.601	PC(37:4)_[M+H]1+ / PE(40:3)_[M+H]1+	Glycerophospholipids (GP)	Glycerophosphocholines	Phosphatidylcholines (PC)	rs102275	chr11:61557803	C / T	0.0628	0.008	3.642e-15	C11orf10	FADS1-FADS2-FADS3
808.585	PC(38:5)_[M+H]1+ / PE(41:5)_[M+H]1+ / PA(43:6)_[M+NH4]1+	Glycerophospholipids (GP)	Glycerophosphocholines	Phosphatidylcholines (PC)	rs102275	chr11:61557803	C / T	-0.0759	0.0054	6.34e-45	C11orf10	FADS1-FADS2-FADS3
810.601	PC(38:4)_[M+H]1+ / PE(41:4)_[M+H]1+	Glycerophospholipids (GP)	Glycerophosphocholines	Phosphatidylcholines (PC)	rs102275	chr11:61557803	C / T	-0.1358	0.0062	1.49e-105	C11orf10	FADS1-FADS2-FADS3
812.617	PC(38:3)_[M+H]1+ / PE(41:3)_[M+H]1+ / PA(43:4)_[M+NH4]1+	Glycerophospholipids (GP)	Glycerophosphocholines	Phosphatidylcholines (PC)	rs102275	chr11:61557803	C / T	0.0535	0.0063	3.013e-17	C11orf10	FADS1-FADS2-FADS3
820.621	PC-O(40:6)_[M+H]1+ / PC-P(40:5)_[M+H]1+	Glycerophospholipids (GP)	Glycerophosphocholines	Phosphatidylcholines (PC)	rs102275	chr11:61557803	C / T	-0.0549	0.0067	1.864e-16	C11orf10	FADS1-FADS2-FADS3
822.637	PC-O(40:5)_[M+H]1+ / PC-P(40:4)_[M+H]1+	Glycerophospholipids (GP)	Glycerophosphocholines	Phosphatidylcholines (PC)	rs102275	chr11:61557803	C / T	-0.0716	0.0071	7.887e-24	C11orf10	FADS1-FADS2-FADS3
825.592	SM(44:9)_[M+H]1-	Sphingolipids (SP)	Phosphosphingolipids	Sphingomyelins (SM)	rs102275	chr11:61557803	C / T	-0.1379	0.0079	1.373e-67	C11orf10	FADS1-FADS2-FADS3
832.535	PS(35:2) _[M+OAc]1-	Glycerophospholipids (GP)	Glycerophosphoserines	Phosphatidylserines (PS)	rs102275	chr11:61557803	C / T	-0.1316	0.0211	4.292e-10	C11orf10	FADS1-FADS2-FADS3
833.519	PI(34:2)_[M-H]1-	Glycerophospholipids (GP)	Glycerophosphoinositols	Phosphatidylinositols (PI)	rs102275	chr11:61557803	C / T	0.0571	0.0086	2.525e-11	C11orf10	FADS1-FADS2-FADS3
834.601	PC(40:6)_[M+H]1+ / PE(43:6)_[M+H]1+	Glycerophospholipids (GP)	Glycerophosphocholines	Phosphatidylcholines (PC)	rs102275	chr11:61557803	C / T	-0.0697	0.008	3.657e-18	C11orf10	FADS1-FADS2-FADS3
836.616	PC(40:5)_[M+H]1+	Glycerophospholipids (GP)	Glycerophosphocholines	Phosphatidylcholines (PC)	rs102275	chr11:61557803	C / T	-0.0999	0.0072	8.246e-44	C11orf10	FADS1-FADS2-FADS3
838.56	PC(36:5)_[M+OAc]1- / PS(40:4)_[M-H]1-	Glycerophospholipids (GP)	Glycerophosphocholines	Phosphatidylcholines (PC)	rs102275	chr11:61557803	C / T	-0.1341	0.0127	3.117e-26	C11orf10	FADS1-FADS2-FADS3
842.592	PC(36:3)_[M+OAc]1- / PS(40:2)_[M-H]1-	Glycerophospholipids (GP)	Glycerophosphocholines	Phosphatidylcholines (PC)	rs102275	chr11:61557803	C / T	0.0757	0.0062	8.877e-34	C11orf10	FADS1-FADS2-FADS3
851.602	PI-O(36:0)_[M-H]1- / PG(37:0)_[M+OAc]1-	Glycerophospholipids (GP)	Glycerophosphoinositols	Phosphatidylinositols (PI)	rs102275	chr11:61557803	C / T	-0.0757	0.0082	3.292e-20	C11orf10	FADS1-FADS2-FADS3
857.519	PI(36:4)_[M-H]1-	Glycerophospholipids (GP)	Glycerophosphoinositols	Phosphatidylinositols (PI)	rs102275	chr11:61557803	C / T	-0.0624	0.0084	1.026e-13	C11orf10	FADS1-FADS2-FADS3
861.55	PI(36:2)_[M-H]1-	Glycerophospholipids (GP)	Glycerophosphoinositols	Phosphatidylinositols (PI)	rs102275	chr11:61557803	C / T	0.06	0.0073	2.711e-16	C11orf10	FADS1-FADS2-FADS3
868.607	PC(38:4)_[M+OAc]1- / PS(42:3)_[M-H]1-	Glycerophospholipids (GP)	Glycerophosphocholines	Phosphatidylcholines (PC)	rs102275	chr11:61557803	C / T	-0.1322	0.0076	2.786e-68	C11orf10	FADS1-FADS2-FADS3
870.623	PC(38:3)_[M+OAc]1- / PS(42:2)_[M-H]1-	Glycerophospholipids (GP)	Glycerophosphocholines	Phosphatidylcholines (PC)	rs102275	chr11:61557803	C / T	0.0717	0.0083	7.658e-18	C11orf10	FADS1-FADS2-FADS3
885.55	PI(38:4)_[M-H]1-	Glycerophospholipids (GP)	Glycerophosphoinositols	Phosphatidylinositols (PI)	rs102275	chr11:61557803	C / T	-0.0691	0.0065	4.078e-26	C11orf10	FADS1-FADS2-FADS3
894.623	PC(40:5)_[M+OAc]1- / PS(44:4)_[M-H]1-	Glycerophospholipids (GP)	Glycerophosphocholines	Phosphatidylcholines (PC)	rs102275	chr11:61557803	C / T	-0.0892	0.0079	1.426e-29	C11orf10	FADS1-FADS2-FADS3
896.639	PC(40:4)_[M+OAc]1- / PS(44:3)_[M-H]1-	Glycerophospholipids (GP)	Glycerophosphocholines	Phosphatidylcholines (PC)	rs102275	chr11:61557803	C / T	-0.0893	0.0099	2.582e-19	C11orf10	FADS1-FADS2-FADS3
902.817	TG(54:3)_[M+NH4]1+	Glycerolipids (GL)	Triradylglycerols	Triacylglycerols (TG)	rs102275	chr11:61557803	C / T	0.0562	0.0092	8.002e-10	C11orf10	FADS1-FADS2-FADS3
920.566	PS(42:7)_[M+OAc]1-	Glycerophospholipids (GP)	Glycerophosphoserines	Phosphatidylserines (PS)	rs102275	chr11:61557803	C / T	-0.167	0.0209	1.441e-15	C11orf10	FADS1-FADS2-FADS3
922.785	TG(56:7)_[M+NH4]1+	Glycerolipids (GL)	Triradylglycerols	Triacylglycerols (TG)	rs102275	chr11:61557803	C / T	-0.0778	0.0112	4.52e-12	C11orf10	FADS1-FADS2-FADS3
923.587	PI(36:1)_[M+OAc]1-	Glycerophospholipids (GP)	Glycerophosphoinositols	Phosphatidylinositols (PI)	rs102275	chr11:61557803	C / T	-0.1246	0.0104	2.28e-33	C11orf10	FADS1-FADS2-FADS3
924.597	PS(42:5)_[M+OAc]1-	Glycerophospholipids (GP)	Glycerophosphoserines	Phosphatidylserines (PS)	rs102275	chr11:61557803	C / T	0.0769	0.0093	1.027e-16	C11orf10	FADS1-FADS2-FADS3
924.67	PC(42:4)_[M+OAc]1-	Glycerophospholipids (GP)	Glycerophosphocholines	Phosphatidylcholines (PC)	rs102275	chr11:61557803	C / T	-0.1173	0.0106	1.331e-28	C11orf10	FADS1-FADS2-FADS3
924.801	TG(56:6)_[M+NH4]1+	Glycerolipids (GL)	Triradylglycerols	Triacylglycerols (TG)	rs102275	chr11:61557803	C / T	-0.0766	0.0091	5.08e-17	C11orf10	FADS1-FADS2-FADS3
925.602	PI(36:0)_[M+OAc]1-	Glycerophospholipids (GP)	Glycerophosphoinositols	Phosphatidylinositols (PI)	rs102275	chr11:61557803	C / T	0.0739	0.0099	8.388e-14	C11orf10	FADS1-FADS2-FADS3
928.833	TG(56:4)_[M+NH4]1+	Glycerolipids (GL)	Triradylglycerols	Triacylglycerols (TG)	rs102275	chr11:61557803	C / T	0.0783	0.0119	4.599e-11	C11orf10	FADS1-FADS2-FADS3
946.785	TG(58:9)_[M+NH4]1+	Glycerolipids (GL)	Triradylglycerols	Triacylglycerols (TG)	rs102275	chr11:61557803	C / T	-0.164	0.0211	8.605e-15	C11orf10	FADS1-FADS2-FADS3
950.613	PS(44:6)_[M+OAc]1-	Glycerophospholipids (GP)	Glycerophosphoserines	Phosphatidylserines (PS)	rs102275	chr11:61557803	C / T	-0.1357	0.0112	5.308e-34	C11orf10	FADS1-FADS2-FADS3
303.233	FA(20:4)_[M-H]1-	Fatty acyls (FA)	Fatty acids and conjugates	Free fatty acids (FA)	rs102274	chr11:61557826	C / T	-0.1022	0.0077	7.201e-40	C11orf10	FADS1-FADS2-FADS3
329.249	FA(22:5)_[M-H]1-	Fatty acyls (FA)	Fatty acids and conjugates	Free fatty acids (FA)	rs102274	chr11:61557826	C / T	-0.0711	0.0102	2.548e-12	C11orf10	FADS1-FADS2-FADS3
331.264	FA(22:4)_[M-H]1-	Fatty acyls (FA)	Fatty acids and conjugates	Free fatty acids (FA)	rs102274	chr11:61557826	C / T	-0.0933	0.0104	3.363e-19	C11orf10	FADS1-FADS2-FADS3
544.34	LPC(20:4)_[M+H]1+	Glycerophospholipids (GP)	Glycerophosphocholines	Lysophosphatidylcholines (LPC)	rs102274	chr11:61557826	C / T	-0.1259	0.0103	1.21e-34	C11orf10	FADS1-FADS2-FADS3
601.519	DG(36:3)_[M+H-H2O]1+	Glycerolipids (GL)	Diradylglycerols	Diacylglycerols (DG)	rs102274	chr11:61557826	C / T	0.0608	0.0092	4.467e-11	C11orf10	FADS1-FADS2-FADS3
603.535	DG(36:2)_[M+H-H2O]1+	Glycerolipids (GL)	Diradylglycerols	Diacylglycerols (DG)	rs102274	chr11:61557826	C / T	0.0486	0.0078	5.235e-10	C11orf10	FADS1-FADS2-FADS3
642.618	CE(16:0)_[M+NH4]1+	Sterol lipids (ST)	Sterols	Cholesteryl esters (CE)	rs102274	chr11:61557826	C / T	-0.0361	0.0056	1.019e-10	C11orf10	FADS1-FADS2-FADS3
664.603	CE(18:3)_[M+NH4]1+	Sterol lipids (ST)	Sterols	Cholesteryl esters (CE)	rs102274	chr11:61557826	C / T	-0.0685	0.0081	1.987e-17	C11orf10	FADS1-FADS2-FADS3
671.466	PA(34:2)_[M-H]1-	Glycerophospholipids (GP)	Glycerophosphates	Phosphatidates (PA)	rs102274	chr11:61557826	C / T	0.0618	0.01	5.808e-10	C11orf10	FADS1-FADS2-FADS3
688.603	CE(20:5)_[M+NH4]1+	Sterol lipids (ST)	Sterols	Cholesteryl esters (CE)	rs102274	chr11:61557826	C / T	-0.1926	0.0138	4.984e-44	C11orf10	FADS1-FADS2-FADS3
690.618	CE(20:4)_[M+NH4]1+	Sterol lipids (ST)	Sterols	Cholesteryl esters (CE)	rs102274	chr11:61557826	C / T	-0.1824	0.0085	4.64e-102	C11orf10	FADS1-FADS2-FADS3
716.523	PE(34:2)_[M+H]1+	Glycerophospholipids (GP)	Glycerophosphoethanolamines	Phosphatidylethanolamines (PE)	rs102274	chr11:61557826	C / T	0.1252	0.0115	1.794e-27	C11orf10	FADS1-FADS2-FADS3
734.57	PC(32:0)_[M+H]1+ / PE(35:0)_[M+H]1+ / PA(37:1)_[M+NH4]1+	Glycerophospholipids (GP)	Glycerophosphocholines	Phosphatidylcholines (PC)	rs102274	chr11:61557826	C / T	-0.0451	0.0052	4.998e-18	C11orf10	FADS1-FADS2-FADS3
742.539	PC(33:3)_[M+H]1+ / PE(36:3)_[M+H]1+ / PA(38:4)_[M+NH4]1+	Glycerophospholipids (GP)	Glycerophosphocholines	Phosphatidylcholines (PC)	rs102274	chr11:61557826	C / T	0.1161	0.0117	3.279e-23	C11orf10	FADS1-FADS2-FADS3
744.554	PC(33:2)_[M+H]1+ / PE(36:2)_[M+H]1+ / PA(38:3)_[M+NH4]1+	Glycerophospholipids (GP)	Glycerophosphocholines	Phosphatidylcholines (PC)	rs102274	chr11:61557826	C / T	0.0713	0.0063	5.466e-30	C11orf10	FADS1-FADS2-FADS3
745.575	PA(39:1)_[M+H]1+	Glycerophospholipids (GP)	Glycerophosphates	Phosphatidates (PA)	rs102274	chr11:61557826	C / T	0.065	0.0059	6.432e-28	C11orf10	FADS1-FADS2-FADS3
749.534	PG(34:0)_[M-H]1-	Glycerophospholipids (GP)	Glycerophosphoglycerols	Phosphatidylglycerols (PG)	rs102274	chr11:61557826	C / T	-0.0638	0.0075	1.606e-17	C11orf10	FADS1-FADS2-FADS3
750.544	PE-O(38:6)_[M+H]1+ / PC-P(35:5)_[M+H]1+	Glycerophospholipids (GP)	Glycerophosphoethanolamines	Phosphatidylethanolamines (PE)	rs102274	chr11:61557826	C / T	-0.074	0.0083	3.387e-19	C11orf10	FADS1-FADS2-FADS3
752.559	PE-O(38:4)_[M-H]1- / PC-O(35:4)_[M-H]1- / PC-P(35:3)_[M-H]1-	Glycerophospholipids (GP)	Glycerophosphoethanolamines	Phosphatidylethanolamines (PE)	rs102274	chr11:61557826	C / T	-0.0957	0.009	1.177e-26	C11orf10	FADS1-FADS2-FADS3
758.57	PC(34:2)_[M+H]1+ / PE(37:2)_[M+H]1+ / PA(39:3)_[M+NH4]1+	Glycerophospholipids (GP)	Glycerophosphocholines	Phosphatidylcholines (PC)	rs102274	chr11:61557826	C / T	0.0398	0.0043	2.656e-20	C11orf10	FADS1-FADS2-FADS3
764.524	PE(38:5)_[M-H]1-	Glycerophospholipids (GP)	Glycerophosphoethanolamines	Phosphatidylethanolamines (PE)	rs102274	chr11:61557826	C / T	-0.0938	0.0094	2.741e-23	C11orf10	FADS1-FADS2-FADS3
766.574	PC-O(36:5)_[M+H]1+ / PC-P(36:4)_[M+H]1+	Glycerophospholipids (GP)	Glycerophosphocholines	Phosphatidylcholines (PC)	rs102274	chr11:61557826	C / T	-0.1173	0.0066	5.899e-71	C11orf10	FADS1-FADS2-FADS3
768.554	PC(35:4)_[M+H]1+ / PE(38:4)_[M+H]1+ / PA(40:5)_[M+NH4]1+	Glycerophospholipids (GP)	Glycerophosphocholines	Phosphatidylcholines (PC)	rs102274	chr11:61557826	C / T	-0.0932	0.0069	1.227e-41	C11orf10	FADS1-FADS2-FADS3
770.606	PC-O(36:3)_M+H]1+ / PC-P(36:2)_M+H]1+	Glycerophospholipids (GP)	Glycerophosphocholines	Phosphatidylcholines (PC)	rs102274	chr11:61557826	C / T	0.0803	0.0074	4.037e-27	C11orf10	FADS1-FADS2-FADS3
771.59	PA(41:2)_[M+H]1+	Glycerophospholipids (GP)	Glycerophosphates	Phosphatidates (PA)	rs102274	chr11:61557826	C / T	0.0836	0.0104	6.898e-16	C11orf10	FADS1-FADS2-FADS3
777.565	PG(36:0)_[M-H]1-	Glycerophospholipids (GP)	Glycerophosphoglycerols	Phosphatidylglycerols (PG)	rs102274	chr11:61557826	C / T	-0.0539	0.0062	4.88e-18	C11orf10	FADS1-FADS2-FADS3
784.586	PC(36:3)_[M+H]1+ / PE(39:3)_[M+H]1+ / PA(41:4)_[M+NH4]1+	Glycerophospholipids (GP)	Glycerophosphocholines	Phosphatidylcholines (PC)	rs102274	chr11:61557826	C / T	0.0659	0.0041	6.255e-58	C11orf10	FADS1-FADS2-FADS3
786.601	PC(36:2)_[M+H]1+ / PE(39:2)_[M+H]1+ / PA(41:3)_[M+NH4]1+	Glycerophospholipids (GP)	Glycerophosphocholines	Phosphatidylcholines (PC)	rs102274	chr11:61557826	C / T	0.0294	0.0042	2.544e-12	C11orf10	FADS1-FADS2-FADS3
793.575	PA(43:4)_[M-H]1-	Glycerophospholipids (GP)	Glycerophosphates	Phosphatidates (PA)	rs102274	chr11:61557826	C / T	-0.0858	0.0073	1.078e-31	C11orf10	FADS1-FADS2-FADS3
794.606	PC-O(38:5)_[M+H]1+ / PC-P(38:4)_[M+H]1+	Glycerophospholipids (GP)	Glycerophosphocholines	Phosphatidylcholines (PC)	rs102274	chr11:61557826	C / T	-0.0849	0.0065	2.174e-39	C11orf10	FADS1-FADS2-FADS3
796.586	PC(37:4)_[M+H]1+ / PE(40:4)_[M+H]1+ / PA(42:5)_[M+NH4]1+	Glycerophospholipids (GP)	Glycerophosphocholines	Phosphatidylcholines (PC)	rs102274	chr11:61557826	C / T	-0.14	0.0094	1.781e-50	C11orf10	FADS1-FADS2-FADS3
798.601	PC(37:4)_[M+H]1+ / PE(40:3)_[M+H]1+	Glycerophospholipids (GP)	Glycerophosphocholines	Phosphatidylcholines (PC)	rs102274	chr11:61557826	C / T	0.0633	0.0081	4.894e-15	C11orf10	FADS1-FADS2-FADS3
808.585	PC(38:5)_[M+H]1+ / PE(41:5)_[M+H]1+ / PA(43:6)_[M+NH4]1+	Glycerophospholipids (GP)	Glycerophosphocholines	Phosphatidylcholines (PC)	rs102274	chr11:61557826	C / T	-0.0765	0.0055	3.689e-44	C11orf10	FADS1-FADS2-FADS3
810.601	PC(38:4)_[M+H]1+ / PE(41:4)_[M+H]1+	Glycerophospholipids (GP)	Glycerophosphocholines	Phosphatidylcholines (PC)	rs102274	chr11:61557826	C / T	-0.1375	0.0063	5.46e-105	C11orf10	FADS1-FADS2-FADS3
812.617	PC(38:3)_[M+H]1+ / PE(41:3)_[M+H]1+ / PA(43:4)_[M+NH4]1+	Glycerophospholipids (GP)	Glycerophosphocholines	Phosphatidylcholines (PC)	rs102274	chr11:61557826	C / T	0.0547	0.0064	1.728e-17	C11orf10	FADS1-FADS2-FADS3
820.621	PC-O(40:6)_[M+H]1+ / PC-P(40:5)_[M+H]1+	Glycerophospholipids (GP)	Glycerophosphocholines	Phosphatidylcholines (PC)	rs102274	chr11:61557826	C / T	-0.0554	0.0067	2.357e-16	C11orf10	FADS1-FADS2-FADS3
822.637	PC-O(40:5)_[M+H]1+ / PC-P(40:4)_[M+H]1+	Glycerophospholipids (GP)	Glycerophosphocholines	Phosphatidylcholines (PC)	rs102274	chr11:61557826	C / T	-0.0722	0.0072	9.796e-24	C11orf10	FADS1-FADS2-FADS3
825.592	SM(44:9)_[M+H]1-	Sphingolipids (SP)	Phosphosphingolipids	Sphingomyelins (SM)	rs102274	chr11:61557826	C / T	-0.1407	0.008	1.126e-68	C11orf10	FADS1-FADS2-FADS3
832.535	PS(35:2) _[M+OAc]1-	Glycerophospholipids (GP)	Glycerophosphoserines	Phosphatidylserines (PS)	rs102274	chr11:61557826	C / T	-0.135	0.0213	2.505e-10	C11orf10	FADS1-FADS2-FADS3
833.519	PI(34:2)_[M-H]1-	Glycerophospholipids (GP)	Glycerophosphoinositols	Phosphatidylinositols (PI)	rs102274	chr11:61557826	C / T	0.0589	0.0086	8.234e-12	C11orf10	FADS1-FADS2-FADS3
834.601	PC(40:6)_[M+H]1+ / PE(43:6)_[M+H]1+	Glycerophospholipids (GP)	Glycerophosphocholines	Phosphatidylcholines (PC)	rs102274	chr11:61557826	C / T	-0.0714	0.0081	1.423e-18	C11orf10	FADS1-FADS2-FADS3
836.616	PC(40:5)_[M+H]1+	Glycerophospholipids (GP)	Glycerophosphocholines	Phosphatidylcholines (PC)	rs102274	chr11:61557826	C / T	-0.1011	0.0073	1.069e-43	C11orf10	FADS1-FADS2-FADS3
838.56	PC(36:5)_[M+OAc]1- / PS(40:4)_[M-H]1-	Glycerophospholipids (GP)	Glycerophosphocholines	Phosphatidylcholines (PC)	rs102274	chr11:61557826	C / T	-0.1396	0.0128	1.081e-27	C11orf10	FADS1-FADS2-FADS3
842.592	PC(36:3)_[M+OAc]1- / PS(40:2)_[M-H]1-	Glycerophospholipids (GP)	Glycerophosphocholines	Phosphatidylcholines (PC)	rs102274	chr11:61557826	C / T	0.0769	0.0063	4.386e-34	C11orf10	FADS1-FADS2-FADS3
851.602	PI-O(36:0)_[M-H]1- / PG(37:0)_[M+OAc]1-	Glycerophospholipids (GP)	Glycerophosphoinositols	Phosphatidylinositols (PI)	rs102274	chr11:61557826	C / T	-0.0771	0.0084	3.296e-20	C11orf10	FADS1-FADS2-FADS3
857.519	PI(36:4)_[M-H]1-	Glycerophospholipids (GP)	Glycerophosphoinositols	Phosphatidylinositols (PI)	rs102274	chr11:61557826	C / T	-0.0629	0.0085	1.192e-13	C11orf10	FADS1-FADS2-FADS3
861.55	PI(36:2)_[M-H]1-	Glycerophospholipids (GP)	Glycerophosphoinositols	Phosphatidylinositols (PI)	rs102274	chr11:61557826	C / T	0.0619	0.0074	5.732e-17	C11orf10	FADS1-FADS2-FADS3
868.607	PC(38:4)_[M+OAc]1- / PS(42:3)_[M-H]1-	Glycerophospholipids (GP)	Glycerophosphocholines	Phosphatidylcholines (PC)	rs102274	chr11:61557826	C / T	-0.1339	0.0076	1.017e-68	C11orf10	FADS1-FADS2-FADS3
870.623	PC(38:3)_[M+OAc]1- / PS(42:2)_[M-H]1-	Glycerophospholipids (GP)	Glycerophosphocholines	Phosphatidylcholines (PC)	rs102274	chr11:61557826	C / T	0.0727	0.0084	6.73e-18	C11orf10	FADS1-FADS2-FADS3
885.55	PI(38:4)_[M-H]1-	Glycerophospholipids (GP)	Glycerophosphoinositols	Phosphatidylinositols (PI)	rs102274	chr11:61557826	C / T	-0.0695	0.0066	7.086e-26	C11orf10	FADS1-FADS2-FADS3
894.623	PC(40:5)_[M+OAc]1- / PS(44:4)_[M-H]1-	Glycerophospholipids (GP)	Glycerophosphocholines	Phosphatidylcholines (PC)	rs102274	chr11:61557826	C / T	-0.0916	0.008	2.174e-30	C11orf10	FADS1-FADS2-FADS3
896.639	PC(40:4)_[M+OAc]1- / PS(44:3)_[M-H]1-	Glycerophospholipids (GP)	Glycerophosphocholines	Phosphatidylcholines (PC)	rs102274	chr11:61557826	C / T	-0.0896	0.0101	6.451e-19	C11orf10	FADS1-FADS2-FADS3
902.817	TG(54:3)_[M+NH4]1+	Glycerolipids (GL)	Triradylglycerols	Triacylglycerols (TG)	rs102274	chr11:61557826	C / T	0.0589	0.0093	2.451e-10	C11orf10	FADS1-FADS2-FADS3
920.566	PS(42:7)_[M+OAc]1-	Glycerophospholipids (GP)	Glycerophosphoserines	Phosphatidylserines (PS)	rs102274	chr11:61557826	C / T	-0.1704	0.0212	8.697e-16	C11orf10	FADS1-FADS2-FADS3
922.785	TG(56:7)_[M+NH4]1+	Glycerolipids (GL)	Triradylglycerols	Triacylglycerols (TG)	rs102274	chr11:61557826	C / T	-0.0798	0.0114	2.489e-12	C11orf10	FADS1-FADS2-FADS3
923.587	PI(36:1)_[M+OAc]1-	Glycerophospholipids (GP)	Glycerophosphoinositols	Phosphatidylinositols (PI)	rs102274	chr11:61557826	C / T	-0.1244	0.0105	2e-32	C11orf10	FADS1-FADS2-FADS3
924.67	PC(42:4)_[M+OAc]1-	Glycerophospholipids (GP)	Glycerophosphocholines	Phosphatidylcholines (PC)	rs102274	chr11:61557826	C / T	-0.119	0.0107	1.29e-28	C11orf10	FADS1-FADS2-FADS3
924.801	TG(56:6)_[M+NH4]1+	Glycerolipids (GL)	Triradylglycerols	Triacylglycerols (TG)	rs102274	chr11:61557826	C / T	-0.0782	0.0093	3.329e-17	C11orf10	FADS1-FADS2-FADS3
925.602	PI(36:0)_[M+OAc]1-	Glycerophospholipids (GP)	Glycerophosphoinositols	Phosphatidylinositols (PI)	rs102274	chr11:61557826	C / T	0.0772	0.01	1.495e-14	C11orf10	FADS1-FADS2-FADS3
928.833	TG(56:4)_[M+NH4]1+	Glycerolipids (GL)	Triradylglycerols	Triacylglycerols (TG)	rs102274	chr11:61557826	C / T	0.0815	0.0121	1.429e-11	C11orf10	FADS1-FADS2-FADS3
946.785	TG(58:9)_[M+NH4]1+	Glycerolipids (GL)	Triradylglycerols	Triacylglycerols (TG)	rs102274	chr11:61557826	C / T	-0.1687	0.0214	3.003e-15	C11orf10	FADS1-FADS2-FADS3
950.613	PS(44:6)_[M+OAc]1-	Glycerophospholipids (GP)	Glycerophosphoserines	Phosphatidylserines (PS)	rs102274	chr11:61557826	C / T	-0.1353	0.0113	5.396e-33	C11orf10	FADS1-FADS2-FADS3
303.233	FA(20:4)_[M-H]1-	Fatty acyls (FA)	Fatty acids and conjugates	Free fatty acids (FA)	rs174538	chr11:61560081	A / G	-0.1041	0.0082	1.202e-36	C11orf10	FADS1-FADS2-FADS3
329.249	FA(22:5)_[M-H]1-	Fatty acyls (FA)	Fatty acids and conjugates	Free fatty acids (FA)	rs174538	chr11:61560081	A / G	-0.0702	0.0107	6.436e-11	C11orf10	FADS1-FADS2-FADS3
331.264	FA(22:4)_[M-H]1-	Fatty acyls (FA)	Fatty acids and conjugates	Free fatty acids (FA)	rs174538	chr11:61560081	A / G	-0.0963	0.0111	3.691e-18	C11orf10	FADS1-FADS2-FADS3
544.34	LPC(20:4)_[M+H]1+	Glycerophospholipids (GP)	Glycerophosphocholines	Lysophosphatidylcholines (LPC)	rs174538	chr11:61560081	A / G	-0.1341	0.011	1.826e-34	C11orf10	FADS1-FADS2-FADS3
642.618	CE(16:0)_[M+NH4]1+	Sterol lipids (ST)	Sterols	Cholesteryl esters (CE)	rs174538	chr11:61560081	A / G	-0.0379	0.0059	1.717e-10	C11orf10	FADS1-FADS2-FADS3
664.603	CE(18:3)_[M+NH4]1+	Sterol lipids (ST)	Sterols	Cholesteryl esters (CE)	rs174538	chr11:61560081	A / G	-0.0668	0.0085	5.266e-15	C11orf10	FADS1-FADS2-FADS3
688.603	CE(20:5)_[M+NH4]1+	Sterol lipids (ST)	Sterols	Cholesteryl esters (CE)	rs174538	chr11:61560081	A / G	-0.1893	0.0148	1.057e-37	C11orf10	FADS1-FADS2-FADS3
690.618	CE(20:4)_[M+NH4]1+	Sterol lipids (ST)	Sterols	Cholesteryl esters (CE)	rs174538	chr11:61560081	A / G	-0.1852	0.0091	6.44e-93	C11orf10	FADS1-FADS2-FADS3
716.523	PE(34:2)_[M+H]1+	Glycerophospholipids (GP)	Glycerophosphoethanolamines	Phosphatidylethanolamines (PE)	rs174538	chr11:61560081	A / G	0.1254	0.0123	2.491e-24	C11orf10	FADS1-FADS2-FADS3
734.57	PC(32:0)_[M+H]1+ / PE(35:0)_[M+H]1+ / PA(37:1)_[M+NH4]1+	Glycerophospholipids (GP)	Glycerophosphocholines	Phosphatidylcholines (PC)	rs174538	chr11:61560081	A / G	-0.0466	0.0055	3.154e-17	C11orf10	FADS1-FADS2-FADS3
742.539	PC(33:3)_[M+H]1+ / PE(36:3)_[M+H]1+ / PA(38:4)_[M+NH4]1+	Glycerophospholipids (GP)	Glycerophosphocholines	Phosphatidylcholines (PC)	rs174538	chr11:61560081	A / G	0.1134	0.0125	9.638e-20	C11orf10	FADS1-FADS2-FADS3
744.554	PC(33:2)_[M+H]1+ / PE(36:2)_[M+H]1+ / PA(38:3)_[M+NH4]1+	Glycerophospholipids (GP)	Glycerophosphocholines	Phosphatidylcholines (PC)	rs174538	chr11:61560081	A / G	0.0707	0.0067	7.223e-26	C11orf10	FADS1-FADS2-FADS3
745.575	PA(39:1)_[M+H]1+	Glycerophospholipids (GP)	Glycerophosphates	Phosphatidates (PA)	rs174538	chr11:61560081	A / G	0.0681	0.0063	4.021e-27	C11orf10	FADS1-FADS2-FADS3
749.534	PG(34:0)_[M-H]1-	Glycerophospholipids (GP)	Glycerophosphoglycerols	Phosphatidylglycerols (PG)	rs174538	chr11:61560081	A / G	-0.0669	0.008	5.082e-17	C11orf10	FADS1-FADS2-FADS3
750.544	PE-O(38:6)_[M+H]1+ / PC-P(35:5)_[M+H]1+	Glycerophospholipids (GP)	Glycerophosphoethanolamines	Phosphatidylethanolamines (PE)	rs174538	chr11:61560081	A / G	-0.0777	0.0087	6.297e-19	C11orf10	FADS1-FADS2-FADS3
752.559	PE-O(38:4)_[M-H]1- / PC-O(35:4)_[M-H]1- / PC-P(35:3)_[M-H]1-	Glycerophospholipids (GP)	Glycerophosphoethanolamines	Phosphatidylethanolamines (PE)	rs174538	chr11:61560081	A / G	-0.0972	0.0095	2.197e-24	C11orf10	FADS1-FADS2-FADS3
758.57	PC(34:2)_[M+H]1+ / PE(37:2)_[M+H]1+ / PA(39:3)_[M+NH4]1+	Glycerophospholipids (GP)	Glycerophosphocholines	Phosphatidylcholines (PC)	rs174538	chr11:61560081	A / G	0.0391	0.0046	2.891e-17	C11orf10	FADS1-FADS2-FADS3
764.524	PE(38:5)_[M-H]1-	Glycerophospholipids (GP)	Glycerophosphoethanolamines	Phosphatidylethanolamines (PE)	rs174538	chr11:61560081	A / G	-0.0935	0.0101	1.503e-20	C11orf10	FADS1-FADS2-FADS3
766.574	PC-O(36:5)_[M+H]1+ / PC-P(36:4)_[M+H]1+	Glycerophospholipids (GP)	Glycerophosphocholines	Phosphatidylcholines (PC)	rs174538	chr11:61560081	A / G	-0.1196	0.007	1.189e-65	C11orf10	FADS1-FADS2-FADS3
768.554	PC(35:4)_[M+H]1+ / PE(38:4)_[M+H]1+ / PA(40:5)_[M+NH4]1+	Glycerophospholipids (GP)	Glycerophosphocholines	Phosphatidylcholines (PC)	rs174538	chr11:61560081	A / G	-0.0946	0.0074	6.561e-38	C11orf10	FADS1-FADS2-FADS3
770.606	PC-O(36:3)_M+H]1+ / PC-P(36:2)_M+H]1+	Glycerophospholipids (GP)	Glycerophosphocholines	Phosphatidylcholines (PC)	rs174538	chr11:61560081	A / G	0.0848	0.008	2.081e-26	C11orf10	FADS1-FADS2-FADS3
771.59	PA(41:2)_[M+H]1+	Glycerophospholipids (GP)	Glycerophosphates	Phosphatidates (PA)	rs174538	chr11:61560081	A / G	0.0871	0.011	2.739e-15	C11orf10	FADS1-FADS2-FADS3
777.565	PG(36:0)_[M-H]1-	Glycerophospholipids (GP)	Glycerophosphoglycerols	Phosphatidylglycerols (PG)	rs174538	chr11:61560081	A / G	-0.0539	0.0066	4.777e-16	C11orf10	FADS1-FADS2-FADS3
784.586	PC(36:3)_[M+H]1+ / PE(39:3)_[M+H]1+ / PA(41:4)_[M+NH4]1+	Glycerophospholipids (GP)	Glycerophosphocholines	Phosphatidylcholines (PC)	rs174538	chr11:61560081	A / G	0.0691	0.0043	7.179e-57	C11orf10	FADS1-FADS2-FADS3
786.601	PC(36:2)_[M+H]1+ / PE(39:2)_[M+H]1+ / PA(41:3)_[M+NH4]1+	Glycerophospholipids (GP)	Glycerophosphocholines	Phosphatidylcholines (PC)	rs174538	chr11:61560081	A / G	0.0301	0.0044	1.207e-11	C11orf10	FADS1-FADS2-FADS3
793.575	PA(43:4)_[M-H]1-	Glycerophospholipids (GP)	Glycerophosphates	Phosphatidates (PA)	rs174538	chr11:61560081	A / G	-0.0869	0.0078	9.196e-29	C11orf10	FADS1-FADS2-FADS3
794.606	PC-O(38:5)_[M+H]1+ / PC-P(38:4)_[M+H]1+	Glycerophospholipids (GP)	Glycerophosphocholines	Phosphatidylcholines (PC)	rs174538	chr11:61560081	A / G	-0.0869	0.0069	1.1e-36	C11orf10	FADS1-FADS2-FADS3
796.586	PC(37:4)_[M+H]1+ / PE(40:4)_[M+H]1+ / PA(42:5)_[M+NH4]1+	Glycerophospholipids (GP)	Glycerophosphocholines	Phosphatidylcholines (PC)	rs174538	chr11:61560081	A / G	-0.1448	0.01	1.517e-47	C11orf10	FADS1-FADS2-FADS3
798.601	PC(37:4)_[M+H]1+ / PE(40:3)_[M+H]1+	Glycerophospholipids (GP)	Glycerophosphocholines	Phosphatidylcholines (PC)	rs174538	chr11:61560081	A / G	0.0664	0.0086	1.303e-14	C11orf10	FADS1-FADS2-FADS3
808.585	PC(38:5)_[M+H]1+ / PE(41:5)_[M+H]1+ / PA(43:6)_[M+NH4]1+	Glycerophospholipids (GP)	Glycerophosphocholines	Phosphatidylcholines (PC)	rs174538	chr11:61560081	A / G	-0.0779	0.0058	7.829e-41	C11orf10	FADS1-FADS2-FADS3
809.555	PI-O(33:0)_[M-H]1-	Glycerophospholipids (GP)	Glycerophosphoinositols	Phosphatidylinositols (PI)	rs174538	chr11:61560081	A / G	-0.158	0.0235	1.777e-11	C11orf10	FADS1-FADS2-FADS3
810.601	PC(38:4)_[M+H]1+ / PE(41:4)_[M+H]1+	Glycerophospholipids (GP)	Glycerophosphocholines	Phosphatidylcholines (PC)	rs174538	chr11:61560081	A / G	-0.1399	0.0067	9.87e-97	C11orf10	FADS1-FADS2-FADS3
812.617	PC(38:3)_[M+H]1+ / PE(41:3)_[M+H]1+ / PA(43:4)_[M+NH4]1+	Glycerophospholipids (GP)	Glycerophosphocholines	Phosphatidylcholines (PC)	rs174538	chr11:61560081	A / G	0.0609	0.0068	5.263e-19	C11orf10	FADS1-FADS2-FADS3
820.621	PC-O(40:6)_[M+H]1+ / PC-P(40:5)_[M+H]1+	Glycerophospholipids (GP)	Glycerophosphocholines	Phosphatidylcholines (PC)	rs174538	chr11:61560081	A / G	-0.0537	0.0072	9.241e-14	C11orf10	FADS1-FADS2-FADS3
822.637	PC-O(40:5)_[M+H]1+ / PC-P(40:4)_[M+H]1+	Glycerophospholipids (GP)	Glycerophosphocholines	Phosphatidylcholines (PC)	rs174538	chr11:61560081	A / G	-0.0746	0.0076	1.634e-22	C11orf10	FADS1-FADS2-FADS3
825.592	SM(44:9)_[M+H]1-	Sphingolipids (SP)	Phosphosphingolipids	Sphingomyelins (SM)	rs174538	chr11:61560081	A / G	-0.1462	0.0086	2.461e-65	C11orf10	FADS1-FADS2-FADS3
832.535	PS(35:2) _[M+OAc]1-	Glycerophospholipids (GP)	Glycerophosphoserines	Phosphatidylserines (PS)	rs174538	chr11:61560081	A / G	-0.1442	0.0227	2e-10	C11orf10	FADS1-FADS2-FADS3
836.616	PC(40:5)_[M+H]1+	Glycerophospholipids (GP)	Glycerophosphocholines	Phosphatidylcholines (PC)	rs174538	chr11:61560081	A / G	-0.102	0.0078	2.458e-39	C11orf10	FADS1-FADS2-FADS3
838.56	PC(36:5)_[M+OAc]1- / PS(40:4)_[M-H]1-	Glycerophospholipids (GP)	Glycerophosphocholines	Phosphatidylcholines (PC)	rs174538	chr11:61560081	A / G	-0.1421	0.0136	1.48e-25	C11orf10	FADS1-FADS2-FADS3
842.592	PC(36:3)_[M+OAc]1- / PS(40:2)_[M-H]1-	Glycerophospholipids (GP)	Glycerophosphocholines	Phosphatidylcholines (PC)	rs174538	chr11:61560081	A / G	0.0758	0.0067	1.108e-29	C11orf10	FADS1-FADS2-FADS3
851.602	PI-O(36:0)_[M-H]1- / PG(37:0)_[M+OAc]1-	Glycerophospholipids (GP)	Glycerophosphoinositols	Phosphatidylinositols (PI)	rs174538	chr11:61560081	A / G	-0.0763	0.0088	6.35e-18	C11orf10	FADS1-FADS2-FADS3
857.519	PI(36:4)_[M-H]1-	Glycerophospholipids (GP)	Glycerophosphoinositols	Phosphatidylinositols (PI)	rs174538	chr11:61560081	A / G	-0.068	0.009	5.112e-14	C11orf10	FADS1-FADS2-FADS3
861.55	PI(36:2)_[M-H]1-	Glycerophospholipids (GP)	Glycerophosphoinositols	Phosphatidylinositols (PI)	rs174538	chr11:61560081	A / G	0.0587	0.0079	9.414e-14	C11orf10	FADS1-FADS2-FADS3
868.607	PC(38:4)_[M+OAc]1- / PS(42:3)_[M-H]1-	Glycerophospholipids (GP)	Glycerophosphocholines	Phosphatidylcholines (PC)	rs174538	chr11:61560081	A / G	-0.137	0.0081	1.794e-63	C11orf10	FADS1-FADS2-FADS3
870.623	PC(38:3)_[M+OAc]1- / PS(42:2)_[M-H]1-	Glycerophospholipids (GP)	Glycerophosphocholines	Phosphatidylcholines (PC)	rs174538	chr11:61560081	A / G	0.0772	0.009	7.198e-18	C11orf10	FADS1-FADS2-FADS3
885.55	PI(38:4)_[M-H]1-	Glycerophospholipids (GP)	Glycerophosphoinositols	Phosphatidylinositols (PI)	rs174538	chr11:61560081	A / G	-0.0712	0.007	2.387e-24	C11orf10	FADS1-FADS2-FADS3
894.623	PC(40:5)_[M+OAc]1- / PS(44:4)_[M-H]1-	Glycerophospholipids (GP)	Glycerophosphocholines	Phosphatidylcholines (PC)	rs174538	chr11:61560081	A / G	-0.0925	0.0085	2.042e-27	C11orf10	FADS1-FADS2-FADS3
896.639	PC(40:4)_[M+OAc]1- / PS(44:3)_[M-H]1-	Glycerophospholipids (GP)	Glycerophosphocholines	Phosphatidylcholines (PC)	rs174538	chr11:61560081	A / G	-0.0962	0.0107	2.647e-19	C11orf10	FADS1-FADS2-FADS3
920.566	PS(42:7)_[M+OAc]1-	Glycerophospholipids (GP)	Glycerophosphoserines	Phosphatidylserines (PS)	rs174538	chr11:61560081	A / G	-0.1671	0.0225	1.182e-13	C11orf10	FADS1-FADS2-FADS3
922.785	TG(56:7)_[M+NH4]1+	Glycerolipids (GL)	Triradylglycerols	Triacylglycerols (TG)	rs174538	chr11:61560081	A / G	-0.0767	0.0121	2.426e-10	C11orf10	FADS1-FADS2-FADS3
923.587	PI(36:1)_[M+OAc]1-	Glycerophospholipids (GP)	Glycerophosphoinositols	Phosphatidylinositols (PI)	rs174538	chr11:61560081	A / G	-0.1308	0.0112	1.064e-31	C11orf10	FADS1-FADS2-FADS3
924.597	PS(42:5)_[M+OAc]1-	Glycerophospholipids (GP)	Glycerophosphoserines	Phosphatidylserines (PS)	rs174538	chr11:61560081	A / G	0.0784	0.01	3.805e-15	C11orf10	FADS1-FADS2-FADS3
924.67	PC(42:4)_[M+OAc]1-	Glycerophospholipids (GP)	Glycerophosphocholines	Phosphatidylcholines (PC)	rs174538	chr11:61560081	A / G	-0.1224	0.0114	5.825e-27	C11orf10	FADS1-FADS2-FADS3
924.801	TG(56:6)_[M+NH4]1+	Glycerolipids (GL)	Triradylglycerols	Triacylglycerols (TG)	rs174538	chr11:61560081	A / G	-0.0786	0.0098	1.3e-15	C11orf10	FADS1-FADS2-FADS3
925.602	PI(36:0)_[M+OAc]1-	Glycerophospholipids (GP)	Glycerophosphoinositols	Phosphatidylinositols (PI)	rs174538	chr11:61560081	A / G	0.0751	0.0106	1.747e-12	C11orf10	FADS1-FADS2-FADS3
928.833	TG(56:4)_[M+NH4]1+	Glycerolipids (GL)	Triradylglycerols	Triacylglycerols (TG)	rs174538	chr11:61560081	A / G	0.086	0.0128	2.012e-11	C11orf10	FADS1-FADS2-FADS3
946.785	TG(58:9)_[M+NH4]1+	Glycerolipids (GL)	Triradylglycerols	Triacylglycerols (TG)	rs174538	chr11:61560081	A / G	-0.1619	0.0228	1.387e-12	C11orf10	FADS1-FADS2-FADS3
950.613	PS(44:6)_[M+OAc]1-	Glycerophospholipids (GP)	Glycerophosphoserines	Phosphatidylserines (PS)	rs174538	chr11:61560081	A / G	-0.1383	0.012	1.606e-30	C11orf10	FADS1-FADS2-FADS3
690.618	CE(20:4)_[M+NH4]1+	Sterol lipids (ST)	Sterols	Cholesteryl esters (CE)	rs695867	chr11:61561288	G / A	-0.1553	0.0239	8.753e-11	FEN1	FADS1-FADS2-FADS3
303.233	FA(20:4)_[M-H]1-	Fatty acyls (FA)	Fatty acids and conjugates	Free fatty acids (FA)	rs174544	chr11:61567753	A / C	-0.1093	0.0085	4.975e-38	FADS1	FADS1-FADS2-FADS3
329.249	FA(22:5)_[M-H]1-	Fatty acyls (FA)	Fatty acids and conjugates	Free fatty acids (FA)	rs174544	chr11:61567753	A / C	-0.081	0.0111	2.539e-13	FADS1	FADS1-FADS2-FADS3
331.264	FA(22:4)_[M-H]1-	Fatty acyls (FA)	Fatty acids and conjugates	Free fatty acids (FA)	rs174544	chr11:61567753	A / C	-0.1062	0.0114	9.931e-21	FADS1	FADS1-FADS2-FADS3
544.34	LPC(20:4)_[M+H]1+	Glycerophospholipids (GP)	Glycerophosphocholines	Lysophosphatidylcholines (LPC)	rs174544	chr11:61567753	A / C	-0.1378	0.0112	1.399e-34	FADS1	FADS1-FADS2-FADS3
664.603	CE(18:3)_[M+NH4]1+	Sterol lipids (ST)	Sterols	Cholesteryl esters (CE)	rs174544	chr11:61567753	A / C	-0.0711	0.0088	7.771e-16	FADS1	FADS1-FADS2-FADS3
671.466	PA(34:2)_[M-H]1-	Glycerophospholipids (GP)	Glycerophosphates	Phosphatidates (PA)	rs174544	chr11:61567753	A / C	0.0701	0.0109	1.331e-10	FADS1	FADS1-FADS2-FADS3
688.603	CE(20:5)_[M+NH4]1+	Sterol lipids (ST)	Sterols	Cholesteryl esters (CE)	rs174544	chr11:61567753	A / C	-0.2064	0.0152	3.851e-42	FADS1	FADS1-FADS2-FADS3
690.618	CE(20:4)_[M+NH4]1+	Sterol lipids (ST)	Sterols	Cholesteryl esters (CE)	rs174544	chr11:61567753	A / C	-0.1962	0.0093	7.35e-99	FADS1	FADS1-FADS2-FADS3
716.523	PE(34:2)_[M+H]1+	Glycerophospholipids (GP)	Glycerophosphoethanolamines	Phosphatidylethanolamines (PE)	rs174544	chr11:61567753	A / C	0.1323	0.0126	1.022e-25	FADS1	FADS1-FADS2-FADS3
734.57	PC(32:0)_[M+H]1+ / PE(35:0)_[M+H]1+ / PA(37:1)_[M+NH4]1+	Glycerophospholipids (GP)	Glycerophosphocholines	Phosphatidylcholines (PC)	rs174544	chr11:61567753	A / C	-0.0481	0.0057	4.027e-17	FADS1	FADS1-FADS2-FADS3
742.539	PC(33:3)_[M+H]1+ / PE(36:3)_[M+H]1+ / PA(38:4)_[M+NH4]1+	Glycerophospholipids (GP)	Glycerophosphocholines	Phosphatidylcholines (PC)	rs174544	chr11:61567753	A / C	0.1172	0.0128	6.867e-20	FADS1	FADS1-FADS2-FADS3
744.554	PC(33:2)_[M+H]1+ / PE(36:2)_[M+H]1+ / PA(38:3)_[M+NH4]1+	Glycerophospholipids (GP)	Glycerophosphocholines	Phosphatidylcholines (PC)	rs174544	chr11:61567753	A / C	0.0731	0.0069	2.695e-26	FADS1	FADS1-FADS2-FADS3
745.575	PA(39:1)_[M+H]1+	Glycerophospholipids (GP)	Glycerophosphates	Phosphatidates (PA)	rs174544	chr11:61567753	A / C	0.0683	0.0065	9.551e-26	FADS1	FADS1-FADS2-FADS3
749.534	PG(34:0)_[M-H]1-	Glycerophospholipids (GP)	Glycerophosphoglycerols	Phosphatidylglycerols (PG)	rs174544	chr11:61567753	A / C	-0.0709	0.0082	5.29e-18	FADS1	FADS1-FADS2-FADS3
750.544	PE-O(38:6)_[M+H]1+ / PC-P(35:5)_[M+H]1+	Glycerophospholipids (GP)	Glycerophosphoethanolamines	Phosphatidylethanolamines (PE)	rs174544	chr11:61567753	A / C	-0.082	0.009	1.285e-19	FADS1	FADS1-FADS2-FADS3
752.559	PE-O(38:4)_[M-H]1- / PC-O(35:4)_[M-H]1- / PC-P(35:3)_[M-H]1-	Glycerophospholipids (GP)	Glycerophosphoethanolamines	Phosphatidylethanolamines (PE)	rs174544	chr11:61567753	A / C	-0.1046	0.0098	1.626e-26	FADS1	FADS1-FADS2-FADS3
757.502	PG(35:3)_[M-H]1-	Glycerophospholipids (GP)	Glycerophosphoglycerols	Phosphatidylglycerols (PG)	rs174544	chr11:61567753	A / C	0.0561	0.0086	5.822e-11	FADS1	FADS1-FADS2-FADS3
758.57	PC(34:2)_[M+H]1+ / PE(37:2)_[M+H]1+ / PA(39:3)_[M+NH4]1+	Glycerophospholipids (GP)	Glycerophosphocholines	Phosphatidylcholines (PC)	rs174544	chr11:61567753	A / C	0.0428	0.0048	2.226e-19	FADS1	FADS1-FADS2-FADS3
764.524	PE(38:5)_[M-H]1-	Glycerophospholipids (GP)	Glycerophosphoethanolamines	Phosphatidylethanolamines (PE)	rs174544	chr11:61567753	A / C	-0.1037	0.0103	9.555e-24	FADS1	FADS1-FADS2-FADS3
766.574	PC-O(36:5)_[M+H]1+ / PC-P(36:4)_[M+H]1+	Glycerophospholipids (GP)	Glycerophosphocholines	Phosphatidylcholines (PC)	rs174544	chr11:61567753	A / C	-0.1268	0.0072	6.391e-69	FADS1	FADS1-FADS2-FADS3
768.554	PC(35:4)_[M+H]1+ / PE(38:4)_[M+H]1+ / PA(40:5)_[M+NH4]1+	Glycerophospholipids (GP)	Glycerophosphocholines	Phosphatidylcholines (PC)	rs174544	chr11:61567753	A / C	-0.1064	0.0076	9.929e-45	FADS1	FADS1-FADS2-FADS3
770.57	PC(35:3)_[M+H]1+ / PE(38:3)_[M+H]1+ / PA(40:4)_[M+NH4]1+	Glycerophospholipids (GP)	Glycerophosphocholines	Phosphatidylcholines (PC)	rs174544	chr11:61567753	A / C	0.0747	0.0083	1.62e-19	FADS1	FADS1-FADS2-FADS3
770.606	PC-O(36:3)_M+H]1+ / PC-P(36:2)_M+H]1+	Glycerophospholipids (GP)	Glycerophosphocholines	Phosphatidylcholines (PC)	rs174544	chr11:61567753	A / C	0.093	0.0082	4.977e-30	FADS1	FADS1-FADS2-FADS3
771.59	PA(41:2)_[M+H]1+	Glycerophospholipids (GP)	Glycerophosphates	Phosphatidates (PA)	rs174544	chr11:61567753	A / C	0.0939	0.0114	1.641e-16	FADS1	FADS1-FADS2-FADS3
777.565	PG(36:0)_[M-H]1-	Glycerophospholipids (GP)	Glycerophosphoglycerols	Phosphatidylglycerols (PG)	rs174544	chr11:61567753	A / C	-0.0574	0.0068	2.17e-17	FADS1	FADS1-FADS2-FADS3
784.586	PC(36:3)_[M+H]1+ / PE(39:3)_[M+H]1+ / PA(41:4)_[M+NH4]1+	Glycerophospholipids (GP)	Glycerophosphocholines	Phosphatidylcholines (PC)	rs174544	chr11:61567753	A / C	0.0764	0.0045	4.909e-65	FADS1	FADS1-FADS2-FADS3
786.601	PC(36:2)_[M+H]1+ / PE(39:2)_[M+H]1+ / PA(41:3)_[M+NH4]1+	Glycerophospholipids (GP)	Glycerophosphocholines	Phosphatidylcholines (PC)	rs174544	chr11:61567753	A / C	0.0284	0.0046	5.68e-10	FADS1	FADS1-FADS2-FADS3
793.575	PA(43:4)_[M-H]1-	Glycerophospholipids (GP)	Glycerophosphates	Phosphatidates (PA)	rs174544	chr11:61567753	A / C	-0.0898	0.008	1.911e-29	FADS1	FADS1-FADS2-FADS3
794.606	PC-O(38:5)_[M+H]1+ / PC-P(38:4)_[M+H]1+	Glycerophospholipids (GP)	Glycerophosphocholines	Phosphatidylcholines (PC)	rs174544	chr11:61567753	A / C	-0.0942	0.0071	2.189e-40	FADS1	FADS1-FADS2-FADS3
796.586	PC(37:4)_[M+H]1+ / PE(40:4)_[M+H]1+ / PA(42:5)_[M+NH4]1+	Glycerophospholipids (GP)	Glycerophosphocholines	Phosphatidylcholines (PC)	rs174544	chr11:61567753	A / C	-0.1581	0.0103	3.885e-53	FADS1	FADS1-FADS2-FADS3
798.601	PC(37:4)_[M+H]1+ / PE(40:3)_[M+H]1+	Glycerophospholipids (GP)	Glycerophosphocholines	Phosphatidylcholines (PC)	rs174544	chr11:61567753	A / C	0.0702	0.0089	3.343e-15	FADS1	FADS1-FADS2-FADS3
806.569	PC(38:6)_[M+H]1+ / PE(41:6)_[M+H]1+	Glycerophospholipids (GP)	Glycerophosphocholines	Phosphatidylcholines (PC)	rs174544	chr11:61567753	A / C	-0.0539	0.0073	1.926e-13	FADS1	FADS1-FADS2-FADS3
808.585	PC(38:5)_[M+H]1+ / PE(41:5)_[M+H]1+ / PA(43:6)_[M+NH4]1+	Glycerophospholipids (GP)	Glycerophosphocholines	Phosphatidylcholines (PC)	rs174544	chr11:61567753	A / C	-0.0849	0.006	2.67e-45	FADS1	FADS1-FADS2-FADS3
809.555	PI-O(33:0)_[M-H]1-	Glycerophospholipids (GP)	Glycerophosphoinositols	Phosphatidylinositols (PI)	rs174544	chr11:61567753	A / C	-0.1732	0.0242	7.437e-13	FADS1	FADS1-FADS2-FADS3
810.601	PC(38:4)_[M+H]1+ / PE(41:4)_[M+H]1+	Glycerophospholipids (GP)	Glycerophosphocholines	Phosphatidylcholines (PC)	rs174544	chr11:61567753	A / C	-0.1529	0.0069	2.71e-108	FADS1	FADS1-FADS2-FADS3
812.617	PC(38:3)_[M+H]1+ / PE(41:3)_[M+H]1+ / PA(43:4)_[M+NH4]1+	Glycerophospholipids (GP)	Glycerophosphocholines	Phosphatidylcholines (PC)	rs174544	chr11:61567753	A / C	0.0633	0.007	2.389e-19	FADS1	FADS1-FADS2-FADS3
820.621	PC-O(40:6)_[M+H]1+ / PC-P(40:5)_[M+H]1+	Glycerophospholipids (GP)	Glycerophosphocholines	Phosphatidylcholines (PC)	rs174544	chr11:61567753	A / C	-0.0615	0.0074	1.384e-16	FADS1	FADS1-FADS2-FADS3
822.637	PC-O(40:5)_[M+H]1+ / PC-P(40:4)_[M+H]1+	Glycerophospholipids (GP)	Glycerophosphocholines	Phosphatidylcholines (PC)	rs174544	chr11:61567753	A / C	-0.0801	0.0079	2.84e-24	FADS1	FADS1-FADS2-FADS3
825.592	SM(44:9)_[M+H]1-	Sphingolipids (SP)	Phosphosphingolipids	Sphingomyelins (SM)	rs174544	chr11:61567753	A / C	-0.1515	0.0088	1.853e-66	FADS1	FADS1-FADS2-FADS3
832.535	PS(35:2) _[M+OAc]1-	Glycerophospholipids (GP)	Glycerophosphoserines	Phosphatidylserines (PS)	rs174544	chr11:61567753	A / C	-0.1475	0.0234	2.858e-10	FADS1	FADS1-FADS2-FADS3
833.519	PI(34:2)_[M-H]1-	Glycerophospholipids (GP)	Glycerophosphoinositols	Phosphatidylinositols (PI)	rs174544	chr11:61567753	A / C	0.0594	0.0094	2.782e-10	FADS1	FADS1-FADS2-FADS3
834.601	PC(40:6)_[M+H]1+ / PE(43:6)_[M+H]1+	Glycerophospholipids (GP)	Glycerophosphocholines	Phosphatidylcholines (PC)	rs174544	chr11:61567753	A / C	-0.0829	0.0089	1.228e-20	FADS1	FADS1-FADS2-FADS3
836.616	PC(40:5)_[M+H]1+	Glycerophospholipids (GP)	Glycerophosphocholines	Phosphatidylcholines (PC)	rs174544	chr11:61567753	A / C	-0.113	0.008	7.766e-46	FADS1	FADS1-FADS2-FADS3
838.56	PC(36:5)_[M+OAc]1- / PS(40:4)_[M-H]1-	Glycerophospholipids (GP)	Glycerophosphocholines	Phosphatidylcholines (PC)	rs174544	chr11:61567753	A / C	-0.1533	0.014	5.181e-28	FADS1	FADS1-FADS2-FADS3
842.592	PC(36:3)_[M+OAc]1- / PS(40:2)_[M-H]1-	Glycerophospholipids (GP)	Glycerophosphocholines	Phosphatidylcholines (PC)	rs174544	chr11:61567753	A / C	0.0875	0.0069	3.543e-37	FADS1	FADS1-FADS2-FADS3
851.602	PI-O(36:0)_[M-H]1- / PG(37:0)_[M+OAc]1-	Glycerophospholipids (GP)	Glycerophosphoinositols	Phosphatidylinositols (PI)	rs174544	chr11:61567753	A / C	-0.0799	0.0091	1.351e-18	FADS1	FADS1-FADS2-FADS3
857.519	PI(36:4)_[M-H]1-	Glycerophospholipids (GP)	Glycerophosphoinositols	Phosphatidylinositols (PI)	rs174544	chr11:61567753	A / C	-0.0752	0.0093	4.875e-16	FADS1	FADS1-FADS2-FADS3
861.55	PI(36:2)_[M-H]1-	Glycerophospholipids (GP)	Glycerophosphoinositols	Phosphatidylinositols (PI)	rs174544	chr11:61567753	A / C	0.0616	0.008	1.951e-14	FADS1	FADS1-FADS2-FADS3
868.607	PC(38:4)_[M+OAc]1- / PS(42:3)_[M-H]1-	Glycerophospholipids (GP)	Glycerophosphocholines	Phosphatidylcholines (PC)	rs174544	chr11:61567753	A / C	-0.1471	0.0083	1.111e-69	FADS1	FADS1-FADS2-FADS3
870.623	PC(38:3)_[M+OAc]1- / PS(42:2)_[M-H]1-	Glycerophospholipids (GP)	Glycerophosphocholines	Phosphatidylcholines (PC)	rs174544	chr11:61567753	A / C	0.0832	0.0092	1.502e-19	FADS1	FADS1-FADS2-FADS3
878.592	PC(39:6)_[M+OAc]1- / PS(43:5)_[M-H]1-	Glycerophospholipids (GP)	Glycerophosphocholines	Phosphatidylcholines (PC)	rs174544	chr11:61567753	A / C	-0.0778	0.0112	4.638e-12	FADS1	FADS1-FADS2-FADS3
885.55	PI(38:4)_[M-H]1-	Glycerophospholipids (GP)	Glycerophosphoinositols	Phosphatidylinositols (PI)	rs174544	chr11:61567753	A / C	-0.0802	0.0072	8.86e-29	FADS1	FADS1-FADS2-FADS3
892.607	PC(40:6)_[M+OAc]1- / PS(44:5)_[M-H]1-	Glycerophospholipids (GP)	Glycerophosphocholines	Phosphatidylcholines (PC)	rs174544	chr11:61567753	A / C	-0.0879	0.0106	1.201e-16	FADS1	FADS1-FADS2-FADS3
894.623	PC(40:5)_[M+OAc]1- / PS(44:4)_[M-H]1-	Glycerophospholipids (GP)	Glycerophosphocholines	Phosphatidylcholines (PC)	rs174544	chr11:61567753	A / C	-0.1016	0.0088	4.086e-31	FADS1	FADS1-FADS2-FADS3
896.639	PC(40:4)_[M+OAc]1- / PS(44:3)_[M-H]1-	Glycerophospholipids (GP)	Glycerophosphocholines	Phosphatidylcholines (PC)	rs174544	chr11:61567753	A / C	-0.1006	0.011	4.647e-20	FADS1	FADS1-FADS2-FADS3
920.566	PS(42:7)_[M+OAc]1-	Glycerophospholipids (GP)	Glycerophosphoserines	Phosphatidylserines (PS)	rs174544	chr11:61567753	A / C	-0.1897	0.0231	2.441e-16	FADS1	FADS1-FADS2-FADS3
922.785	TG(56:7)_[M+NH4]1+	Glycerolipids (GL)	Triradylglycerols	Triacylglycerols (TG)	rs174544	chr11:61567753	A / C	-0.094	0.0124	3.445e-14	FADS1	FADS1-FADS2-FADS3
923.587	PI(36:1)_[M+OAc]1-	Glycerophospholipids (GP)	Glycerophosphoinositols	Phosphatidylinositols (PI)	rs174544	chr11:61567753	A / C	-0.1404	0.0114	8.906e-35	FADS1	FADS1-FADS2-FADS3
924.597	PS(42:5)_[M+OAc]1-	Glycerophospholipids (GP)	Glycerophosphoserines	Phosphatidylserines (PS)	rs174544	chr11:61567753	A / C	0.0871	0.0103	1.92e-17	FADS1	FADS1-FADS2-FADS3
924.67	PC(42:4)_[M+OAc]1-	Glycerophospholipids (GP)	Glycerophosphocholines	Phosphatidylcholines (PC)	rs174544	chr11:61567753	A / C	-0.1264	0.0117	3.829e-27	FADS1	FADS1-FADS2-FADS3
924.801	TG(56:6)_[M+NH4]1+	Glycerolipids (GL)	Triradylglycerols	Triacylglycerols (TG)	rs174544	chr11:61567753	A / C	-0.0915	0.0101	1.307e-19	FADS1	FADS1-FADS2-FADS3
925.602	PI(36:0)_[M+OAc]1-	Glycerophospholipids (GP)	Glycerophosphoinositols	Phosphatidylinositols (PI)	rs174544	chr11:61567753	A / C	0.0846	0.0109	9.067e-15	FADS1	FADS1-FADS2-FADS3
928.833	TG(56:4)_[M+NH4]1+	Glycerolipids (GL)	Triradylglycerols	Triacylglycerols (TG)	rs174544	chr11:61567753	A / C	0.0851	0.0132	1.175e-10	FADS1	FADS1-FADS2-FADS3
946.785	TG(58:9)_[M+NH4]1+	Glycerolipids (GL)	Triradylglycerols	Triacylglycerols (TG)	rs174544	chr11:61567753	A / C	-0.2029	0.0235	5.058e-18	FADS1	FADS1-FADS2-FADS3
950.613	PS(44:6)_[M+OAc]1-	Glycerophospholipids (GP)	Glycerophosphoserines	Phosphatidylserines (PS)	rs174544	chr11:61567753	A / C	-0.1542	0.0123	6.873e-36	FADS1	FADS1-FADS2-FADS3
303.233	FA(20:4)_[M-H]1-	Fatty acyls (FA)	Fatty acids and conjugates	Free fatty acids (FA)	rs174545	chr11:61569306	G / C	-0.1065	0.0079	6.383e-41	FADS1	FADS1-FADS2-FADS3
329.249	FA(22:5)_[M-H]1-	Fatty acyls (FA)	Fatty acids and conjugates	Free fatty acids (FA)	rs174545	chr11:61569306	G / C	-0.0764	0.0104	2.391e-13	FADS1	FADS1-FADS2-FADS3
331.264	FA(22:4)_[M-H]1-	Fatty acyls (FA)	Fatty acids and conjugates	Free fatty acids (FA)	rs174545	chr11:61569306	G / C	-0.0997	0.0107	1.529e-20	FADS1	FADS1-FADS2-FADS3
544.34	LPC(20:4)_[M+H]1+	Glycerophospholipids (GP)	Glycerophosphocholines	Lysophosphatidylcholines (LPC)	rs174545	chr11:61569306	G / C	-0.1374	0.0105	8.115e-39	FADS1	FADS1-FADS2-FADS3
601.519	DG(36:3)_[M+H-H2O]1+	Glycerolipids (GL)	Diradylglycerols	Diacylglycerols (DG)	rs174545	chr11:61569306	G / C	0.0629	0.0095	3.026e-11	FADS1	FADS1-FADS2-FADS3
603.535	DG(36:2)_[M+H-H2O]1+	Glycerolipids (GL)	Diradylglycerols	Diacylglycerols (DG)	rs174545	chr11:61569306	G / C	0.0514	0.0081	1.844e-10	FADS1	FADS1-FADS2-FADS3
642.618	CE(16:0)_[M+NH4]1+	Sterol lipids (ST)	Sterols	Cholesteryl esters (CE)	rs174545	chr11:61569306	G / C	-0.0394	0.0057	5.789e-12	FADS1	FADS1-FADS2-FADS3
664.603	CE(18:3)_[M+NH4]1+	Sterol lipids (ST)	Sterols	Cholesteryl esters (CE)	rs174545	chr11:61569306	G / C	-0.0721	0.0083	3.877e-18	FADS1	FADS1-FADS2-FADS3
671.466	PA(34:2)_[M-H]1-	Glycerophospholipids (GP)	Glycerophosphates	Phosphatidates (PA)	rs174545	chr11:61569306	G / C	0.0639	0.0103	5.409e-10	FADS1	FADS1-FADS2-FADS3
688.603	CE(20:5)_[M+NH4]1+	Sterol lipids (ST)	Sterols	Cholesteryl esters (CE)	rs174545	chr11:61569306	G / C	-0.2045	0.0143	1.952e-46	FADS1	FADS1-FADS2-FADS3
690.618	CE(20:4)_[M+NH4]1+	Sterol lipids (ST)	Sterols	Cholesteryl esters (CE)	rs174545	chr11:61569306	G / C	-0.197	0.0087	1.76e-112	FADS1	FADS1-FADS2-FADS3
716.523	PE(34:2)_[M+H]1+	Glycerophospholipids (GP)	Glycerophosphoethanolamines	Phosphatidylethanolamines (PE)	rs174545	chr11:61569306	G / C	0.1347	0.0119	7.139e-30	FADS1	FADS1-FADS2-FADS3
734.57	PC(32:0)_[M+H]1+ / PE(35:0)_[M+H]1+ / PA(37:1)_[M+NH4]1+	Glycerophospholipids (GP)	Glycerophosphocholines	Phosphatidylcholines (PC)	rs174545	chr11:61569306	G / C	-0.0476	0.0054	6.179e-19	FADS1	FADS1-FADS2-FADS3
742.539	PC(33:3)_[M+H]1+ / PE(36:3)_[M+H]1+ / PA(38:4)_[M+NH4]1+	Glycerophospholipids (GP)	Glycerophosphocholines	Phosphatidylcholines (PC)	rs174545	chr11:61569306	G / C	0.1208	0.0121	1.645e-23	FADS1	FADS1-FADS2-FADS3
744.554	PC(33:2)_[M+H]1+ / PE(36:2)_[M+H]1+ / PA(38:3)_[M+NH4]1+	Glycerophospholipids (GP)	Glycerophosphocholines	Phosphatidylcholines (PC)	rs174545	chr11:61569306	G / C	0.0752	0.0065	4.164e-31	FADS1	FADS1-FADS2-FADS3
745.575	PA(39:1)_[M+H]1+	Glycerophospholipids (GP)	Glycerophosphates	Phosphatidates (PA)	rs174545	chr11:61569306	G / C	0.0684	0.0062	1.006e-28	FADS1	FADS1-FADS2-FADS3
749.534	PG(34:0)_[M-H]1-	Glycerophospholipids (GP)	Glycerophosphoglycerols	Phosphatidylglycerols (PG)	rs174545	chr11:61569306	G / C	-0.0706	0.0077	6.526e-20	FADS1	FADS1-FADS2-FADS3
750.544	PE-O(38:6)_[M+H]1+ / PC-P(35:5)_[M+H]1+	Glycerophospholipids (GP)	Glycerophosphoethanolamines	Phosphatidylethanolamines (PE)	rs174545	chr11:61569306	G / C	-0.0823	0.0085	3.801e-22	FADS1	FADS1-FADS2-FADS3
752.559	PE-O(38:4)_[M-H]1- / PC-O(35:4)_[M-H]1- / PC-P(35:3)_[M-H]1-	Glycerophospholipids (GP)	Glycerophosphoethanolamines	Phosphatidylethanolamines (PE)	rs174545	chr11:61569306	G / C	-0.1061	0.0092	1.939e-30	FADS1	FADS1-FADS2-FADS3
757.502	PG(35:3)_[M-H]1-	Glycerophospholipids (GP)	Glycerophosphoglycerols	Phosphatidylglycerols (PG)	rs174545	chr11:61569306	G / C	0.0547	0.0081	1.671e-11	FADS1	FADS1-FADS2-FADS3
758.57	PC(34:2)_[M+H]1+ / PE(37:2)_[M+H]1+ / PA(39:3)_[M+NH4]1+	Glycerophospholipids (GP)	Glycerophosphocholines	Phosphatidylcholines (PC)	rs174545	chr11:61569306	G / C	0.0413	0.0045	1.879e-20	FADS1	FADS1-FADS2-FADS3
764.524	PE(38:5)_[M-H]1-	Glycerophospholipids (GP)	Glycerophosphoethanolamines	Phosphatidylethanolamines (PE)	rs174545	chr11:61569306	G / C	-0.0991	0.0097	2.357e-24	FADS1	FADS1-FADS2-FADS3
766.574	PC-O(36:5)_[M+H]1+ / PC-P(36:4)_[M+H]1+	Glycerophospholipids (GP)	Glycerophosphocholines	Phosphatidylcholines (PC)	rs174545	chr11:61569306	G / C	-0.1258	0.0068	1.954e-77	FADS1	FADS1-FADS2-FADS3
768.554	PC(35:4)_[M+H]1+ / PE(38:4)_[M+H]1+ / PA(40:5)_[M+NH4]1+	Glycerophospholipids (GP)	Glycerophosphocholines	Phosphatidylcholines (PC)	rs174545	chr11:61569306	G / C	-0.1002	0.0071	8.337e-45	FADS1	FADS1-FADS2-FADS3
768.591	PC-O(36:4)_[M+H]1+ / PC-P(36:3)_[M+H]1+	Glycerophospholipids (GP)	Glycerophosphocholines	Phosphatidylcholines (PC)	rs174545	chr11:61569306	G / C	-0.0756	0.0068	2.355e-28	FADS1	FADS1-FADS2-FADS3
770.57	PC(35:3)_[M+H]1+ / PE(38:3)_[M+H]1+ / PA(40:4)_[M+NH4]1+	Glycerophospholipids (GP)	Glycerophosphocholines	Phosphatidylcholines (PC)	rs174545	chr11:61569306	G / C	0.0709	0.0078	8.079e-20	FADS1	FADS1-FADS2-FADS3
770.606	PC-O(36:3)_M+H]1+ / PC-P(36:2)_M+H]1+	Glycerophospholipids (GP)	Glycerophosphocholines	Phosphatidylcholines (PC)	rs174545	chr11:61569306	G / C	0.0856	0.0077	8.805e-29	FADS1	FADS1-FADS2-FADS3
771.59	PA(41:2)_[M+H]1+	Glycerophospholipids (GP)	Glycerophosphates	Phosphatidates (PA)	rs174545	chr11:61569306	G / C	0.0876	0.0107	2.162e-16	FADS1	FADS1-FADS2-FADS3
777.565	PG(36:0)_[M-H]1-	Glycerophospholipids (GP)	Glycerophosphoglycerols	Phosphatidylglycerols (PG)	rs174545	chr11:61569306	G / C	-0.057	0.0064	5.142e-19	FADS1	FADS1-FADS2-FADS3
782.57	PC(36:4)_[M+H]1+ / PE(39:4)_[M+H]1+ / PA(41:5)_[M+NH4]1+	Glycerophospholipids (GP)	Glycerophosphocholines	Phosphatidylcholines (PC)	rs174545	chr11:61569306	G / C	-0.1254	0.0052	3.25e-130	FADS1	FADS1-FADS2-FADS3
784.586	PC(36:3)_[M+H]1+ / PE(39:3)_[M+H]1+ / PA(41:4)_[M+NH4]1+	Glycerophospholipids (GP)	Glycerophosphocholines	Phosphatidylcholines (PC)	rs174545	chr11:61569306	G / C	0.0697	0.0043	2.537e-60	FADS1	FADS1-FADS2-FADS3
786.601	PC(36:2)_[M+H]1+ / PE(39:2)_[M+H]1+ / PA(41:3)_[M+NH4]1+	Glycerophospholipids (GP)	Glycerophosphocholines	Phosphatidylcholines (PC)	rs174545	chr11:61569306	G / C	0.0311	0.0043	9.062e-13	FADS1	FADS1-FADS2-FADS3
793.575	PA(43:4)_[M-H]1-	Glycerophospholipids (GP)	Glycerophosphates	Phosphatidates (PA)	rs174545	chr11:61569306	G / C	-0.0905	0.0075	3.922e-33	FADS1	FADS1-FADS2-FADS3
794.606	PC-O(38:5)_[M+H]1+ / PC-P(38:4)_[M+H]1+	Glycerophospholipids (GP)	Glycerophosphocholines	Phosphatidylcholines (PC)	rs174545	chr11:61569306	G / C	-0.0917	0.0066	1.672e-43	FADS1	FADS1-FADS2-FADS3
796.586	PC(37:4)_[M+H]1+ / PE(40:4)_[M+H]1+ / PA(42:5)_[M+NH4]1+	Glycerophospholipids (GP)	Glycerophosphocholines	Phosphatidylcholines (PC)	rs174545	chr11:61569306	G / C	-0.1527	0.0097	2.629e-56	FADS1	FADS1-FADS2-FADS3
796.622	PC-O(38:4)_[M+H]1+ / PC-P(38:3)_[M+H]1+	Glycerophospholipids (GP)	Glycerophosphocholines	Phosphatidylcholines (PC)	rs174545	chr11:61569306	G / C	-0.0512	0.008	1.408e-10	FADS1	FADS1-FADS2-FADS3
798.601	PC(37:4)_[M+H]1+ / PE(40:3)_[M+H]1+	Glycerophospholipids (GP)	Glycerophosphocholines	Phosphatidylcholines (PC)	rs174545	chr11:61569306	G / C	0.0645	0.0083	7.567e-15	FADS1	FADS1-FADS2-FADS3
806.569	PC(38:6)_[M+H]1+ / PE(41:6)_[M+H]1+	Glycerophospholipids (GP)	Glycerophosphocholines	Phosphatidylcholines (PC)	rs174545	chr11:61569306	G / C	-0.0519	0.0069	6.781e-14	FADS1	FADS1-FADS2-FADS3
808.585	PC(38:5)_[M+H]1+ / PE(41:5)_[M+H]1+ / PA(43:6)_[M+NH4]1+	Glycerophospholipids (GP)	Glycerophosphocholines	Phosphatidylcholines (PC)	rs174545	chr11:61569306	G / C	-0.0822	0.0056	3.132e-48	FADS1	FADS1-FADS2-FADS3
809.534	PA(40:5)_[M+OAc]1- / PG(39:5)_[M-H]1-	Glycerophospholipids (GP)	Glycerophosphates	Phosphatidates (PA)	rs174545	chr11:61569306	G / C	-0.084	0.0136	5.761e-10	FADS1	FADS1-FADS2-FADS3
809.555	PI-O(33:0)_[M-H]1-	Glycerophospholipids (GP)	Glycerophosphoinositols	Phosphatidylinositols (PI)	rs174545	chr11:61569306	G / C	-0.1653	0.0227	3.516e-13	FADS1	FADS1-FADS2-FADS3
810.601	PC(38:4)_[M+H]1+ / PE(41:4)_[M+H]1+	Glycerophospholipids (GP)	Glycerophosphocholines	Phosphatidylcholines (PC)	rs174545	chr11:61569306	G / C	-0.1478	0.0065	5.53e-115	FADS1	FADS1-FADS2-FADS3
812.617	PC(38:3)_[M+H]1+ / PE(41:3)_[M+H]1+ / PA(43:4)_[M+NH4]1+	Glycerophospholipids (GP)	Glycerophosphocholines	Phosphatidylcholines (PC)	rs174545	chr11:61569306	G / C	0.0588	0.0066	4.901e-19	FADS1	FADS1-FADS2-FADS3
817.575	PA(45:6)_[M-H]1-	Glycerophospholipids (GP)	Glycerophosphates	Phosphatidates (PA)	rs174545	chr11:61569306	G / C	0.0478	0.0068	1.681e-12	FADS1	FADS1-FADS2-FADS3
820.621	PC-O(40:6)_[M+H]1+ / PC-P(40:5)_[M+H]1+	Glycerophospholipids (GP)	Glycerophosphocholines	Phosphatidylcholines (PC)	rs174545	chr11:61569306	G / C	-0.0603	0.007	6.554e-18	FADS1	FADS1-FADS2-FADS3
822.637	PC-O(40:5)_[M+H]1+ / PC-P(40:4)_[M+H]1+	Glycerophospholipids (GP)	Glycerophosphocholines	Phosphatidylcholines (PC)	rs174545	chr11:61569306	G / C	-0.0786	0.0074	2.298e-26	FADS1	FADS1-FADS2-FADS3
825.592	SM(44:9)_[M+H]1-	Sphingolipids (SP)	Phosphosphingolipids	Sphingomyelins (SM)	rs174545	chr11:61569306	G / C	-0.1509	0.0083	1.075e-74	FADS1	FADS1-FADS2-FADS3
830.569	PC(40:8)_[M+H]1+	Glycerophospholipids (GP)	Glycerophosphocholines	Phosphatidylcholines (PC)	rs174545	chr11:61569306	G / C	-0.1098	0.0097	6.391e-30	FADS1	FADS1-FADS2-FADS3
832.535	PS(35:2) _[M+OAc]1-	Glycerophospholipids (GP)	Glycerophosphoserines	Phosphatidylserines (PS)	rs174545	chr11:61569306	G / C	-0.1467	0.0219	2.24e-11	FADS1	FADS1-FADS2-FADS3
833.519	PI(34:2)_[M-H]1-	Glycerophospholipids (GP)	Glycerophosphoinositols	Phosphatidylinositols (PI)	rs174545	chr11:61569306	G / C	0.0607	0.0089	7.739e-12	FADS1	FADS1-FADS2-FADS3
834.601	PC(40:6)_[M+H]1+ / PE(43:6)_[M+H]1+	Glycerophospholipids (GP)	Glycerophosphocholines	Phosphatidylcholines (PC)	rs174545	chr11:61569306	G / C	-0.076	0.0083	7.755e-20	FADS1	FADS1-FADS2-FADS3
836.616	PC(40:5)_[M+H]1+	Glycerophospholipids (GP)	Glycerophosphocholines	Phosphatidylcholines (PC)	rs174545	chr11:61569306	G / C	-0.108	0.0075	1.741e-47	FADS1	FADS1-FADS2-FADS3
838.56	PC(36:5)_[M+OAc]1- / PS(40:4)_[M-H]1-	Glycerophospholipids (GP)	Glycerophosphocholines	Phosphatidylcholines (PC)	rs174545	chr11:61569306	G / C	-0.1493	0.0131	6.185e-30	FADS1	FADS1-FADS2-FADS3
842.592	PC(36:3)_[M+OAc]1- / PS(40:2)_[M-H]1-	Glycerophospholipids (GP)	Glycerophosphocholines	Phosphatidylcholines (PC)	rs174545	chr11:61569306	G / C	0.0805	0.0065	2.475e-35	FADS1	FADS1-FADS2-FADS3
851.602	PI-O(36:0)_[M-H]1- / PG(37:0)_[M+OAc]1-	Glycerophospholipids (GP)	Glycerophosphoinositols	Phosphatidylinositols (PI)	rs174545	chr11:61569306	G / C	-0.0803	0.0086	1.084e-20	FADS1	FADS1-FADS2-FADS3
857.519	PI(36:4)_[M-H]1-	Glycerophospholipids (GP)	Glycerophosphoinositols	Phosphatidylinositols (PI)	rs174545	chr11:61569306	G / C	-0.067	0.0087	1.544e-14	FADS1	FADS1-FADS2-FADS3
859.534	PI(36:3)_[M-H]1-	Glycerophospholipids (GP)	Glycerophosphoinositols	Phosphatidylinositols (PI)	rs174545	chr11:61569306	G / C	0.1151	0.0092	3.003e-36	FADS1	FADS1-FADS2-FADS3
861.55	PI(36:2)_[M-H]1-	Glycerophospholipids (GP)	Glycerophosphoinositols	Phosphatidylinositols (PI)	rs174545	chr11:61569306	G / C	0.0629	0.0076	1.159e-16	FADS1	FADS1-FADS2-FADS3
868.607	PC(38:4)_[M+OAc]1- / PS(42:3)_[M-H]1-	Glycerophospholipids (GP)	Glycerophosphocholines	Phosphatidylcholines (PC)	rs174545	chr11:61569306	G / C	-0.143	0.0079	4.588e-74	FADS1	FADS1-FADS2-FADS3
870.623	PC(38:3)_[M+OAc]1- / PS(42:2)_[M-H]1-	Glycerophospholipids (GP)	Glycerophosphocholines	Phosphatidylcholines (PC)	rs174545	chr11:61569306	G / C	0.078	0.0087	2.458e-19	FADS1	FADS1-FADS2-FADS3
885.55	PI(38:4)_[M-H]1-	Glycerophospholipids (GP)	Glycerophosphoinositols	Phosphatidylinositols (PI)	rs174545	chr11:61569306	G / C	-0.0726	0.0068	8.422e-27	FADS1	FADS1-FADS2-FADS3
892.607	PC(40:6)_[M+OAc]1- / PS(44:5)_[M-H]1-	Glycerophospholipids (GP)	Glycerophosphocholines	Phosphatidylcholines (PC)	rs174545	chr11:61569306	G / C	-0.0803	0.01	1.084e-15	FADS1	FADS1-FADS2-FADS3
894.623	PC(40:5)_[M+OAc]1- / PS(44:4)_[M-H]1-	Glycerophospholipids (GP)	Glycerophosphocholines	Phosphatidylcholines (PC)	rs174545	chr11:61569306	G / C	-0.0974	0.0082	1.991e-32	FADS1	FADS1-FADS2-FADS3
896.639	PC(40:4)_[M+OAc]1- / PS(44:3)_[M-H]1-	Glycerophospholipids (GP)	Glycerophosphocholines	Phosphatidylcholines (PC)	rs174545	chr11:61569306	G / C	-0.096	0.0103	1.39e-20	FADS1	FADS1-FADS2-FADS3
902.817	TG(54:3)_[M+NH4]1+	Glycerolipids (GL)	Triradylglycerols	Triacylglycerols (TG)	rs174545	chr11:61569306	G / C	0.0623	0.0096	8.189e-11	FADS1	FADS1-FADS2-FADS3
920.566	PS(42:7)_[M+OAc]1-	Glycerophospholipids (GP)	Glycerophosphoserines	Phosphatidylserines (PS)	rs174545	chr11:61569306	G / C	-0.1836	0.0217	2.977e-17	FADS1	FADS1-FADS2-FADS3
922.785	TG(56:7)_[M+NH4]1+	Glycerolipids (GL)	Triradylglycerols	Triacylglycerols (TG)	rs174545	chr11:61569306	G / C	-0.0865	0.0117	1.587e-13	FADS1	FADS1-FADS2-FADS3
923.587	PI(36:1)_[M+OAc]1-	Glycerophospholipids (GP)	Glycerophosphoinositols	Phosphatidylinositols (PI)	rs174545	chr11:61569306	G / C	-0.1348	0.0108	6.973e-36	FADS1	FADS1-FADS2-FADS3
924.597	PS(42:5)_[M+OAc]1-	Glycerophospholipids (GP)	Glycerophosphoserines	Phosphatidylserines (PS)	rs174545	chr11:61569306	G / C	0.083	0.0097	9.022e-18	FADS1	FADS1-FADS2-FADS3
924.67	PC(42:4)_[M+OAc]1-	Glycerophospholipids (GP)	Glycerophosphocholines	Phosphatidylcholines (PC)	rs174545	chr11:61569306	G / C	-0.1241	0.011	1.706e-29	FADS1	FADS1-FADS2-FADS3
924.801	TG(56:6)_[M+NH4]1+	Glycerolipids (GL)	Triradylglycerols	Triacylglycerols (TG)	rs174545	chr11:61569306	G / C	-0.086	0.0095	1.623e-19	FADS1	FADS1-FADS2-FADS3
925.602	PI(36:0)_[M+OAc]1-	Glycerophospholipids (GP)	Glycerophosphoinositols	Phosphatidylinositols (PI)	rs174545	chr11:61569306	G / C	0.0793	0.0103	1.225e-14	FADS1	FADS1-FADS2-FADS3
928.833	TG(56:4)_[M+NH4]1+	Glycerolipids (GL)	Triradylglycerols	Triacylglycerols (TG)	rs174545	chr11:61569306	G / C	0.0859	0.0124	4.219e-12	FADS1	FADS1-FADS2-FADS3
946.785	TG(58:9)_[M+NH4]1+	Glycerolipids (GL)	Triradylglycerols	Triacylglycerols (TG)	rs174545	chr11:61569306	G / C	-0.1852	0.0221	5.164e-17	FADS1	FADS1-FADS2-FADS3
950.613	PS(44:6)_[M+OAc]1-	Glycerophospholipids (GP)	Glycerophosphoserines	Phosphatidylserines (PS)	rs174545	chr11:61569306	G / C	-0.1462	0.0116	2.719e-36	FADS1	FADS1-FADS2-FADS3
303.233	FA(20:4)_[M-H]1-	Fatty acyls (FA)	Fatty acids and conjugates	Free fatty acids (FA)	rs174546	chr11:61569830	T / C	-0.1063	0.0079	8.096e-41	FADS1	FADS1-FADS2-FADS3
329.249	FA(22:5)_[M-H]1-	Fatty acyls (FA)	Fatty acids and conjugates	Free fatty acids (FA)	rs174546	chr11:61569830	T / C	-0.0765	0.0104	2.318e-13	FADS1	FADS1-FADS2-FADS3
331.264	FA(22:4)_[M-H]1-	Fatty acyls (FA)	Fatty acids and conjugates	Free fatty acids (FA)	rs174546	chr11:61569830	T / C	-0.0997	0.0107	1.529e-20	FADS1	FADS1-FADS2-FADS3
544.34	LPC(20:4)_[M+H]1+	Glycerophospholipids (GP)	Glycerophosphocholines	Lysophosphatidylcholines (LPC)	rs174546	chr11:61569830	T / C	-0.1372	0.0105	1.096e-38	FADS1	FADS1-FADS2-FADS3
601.519	DG(36:3)_[M+H-H2O]1+	Glycerolipids (GL)	Diradylglycerols	Diacylglycerols (DG)	rs174546	chr11:61569830	T / C	0.0628	0.0095	3.344e-11	FADS1	FADS1-FADS2-FADS3
603.535	DG(36:2)_[M+H-H2O]1+	Glycerolipids (GL)	Diradylglycerols	Diacylglycerols (DG)	rs174546	chr11:61569830	T / C	0.0513	0.0081	1.999e-10	FADS1	FADS1-FADS2-FADS3
642.618	CE(16:0)_[M+NH4]1+	Sterol lipids (ST)	Sterols	Cholesteryl esters (CE)	rs174546	chr11:61569830	T / C	-0.0394	0.0057	5.789e-12	FADS1	FADS1-FADS2-FADS3
664.603	CE(18:3)_[M+NH4]1+	Sterol lipids (ST)	Sterols	Cholesteryl esters (CE)	rs174546	chr11:61569830	T / C	-0.0721	0.0083	4.049e-18	FADS1	FADS1-FADS2-FADS3
671.466	PA(34:2)_[M-H]1-	Glycerophospholipids (GP)	Glycerophosphates	Phosphatidates (PA)	rs174546	chr11:61569830	T / C	0.0639	0.0103	5.452e-10	FADS1	FADS1-FADS2-FADS3
688.603	CE(20:5)_[M+NH4]1+	Sterol lipids (ST)	Sterols	Cholesteryl esters (CE)	rs174546	chr11:61569830	T / C	-0.2046	0.0143	1.879e-46	FADS1	FADS1-FADS2-FADS3
690.618	CE(20:4)_[M+NH4]1+	Sterol lipids (ST)	Sterols	Cholesteryl esters (CE)	rs174546	chr11:61569830	T / C	-0.1972	0.0087	1.22e-112	FADS1	FADS1-FADS2-FADS3
716.523	PE(34:2)_[M+H]1+	Glycerophospholipids (GP)	Glycerophosphoethanolamines	Phosphatidylethanolamines (PE)	rs174546	chr11:61569830	T / C	0.1349	0.0119	5.983e-30	FADS1	FADS1-FADS2-FADS3
734.57	PC(32:0)_[M+H]1+ / PE(35:0)_[M+H]1+ / PA(37:1)_[M+NH4]1+	Glycerophospholipids (GP)	Glycerophosphocholines	Phosphatidylcholines (PC)	rs174546	chr11:61569830	T / C	-0.0475	0.0054	7.308e-19	FADS1	FADS1-FADS2-FADS3
742.539	PC(33:3)_[M+H]1+ / PE(36:3)_[M+H]1+ / PA(38:4)_[M+NH4]1+	Glycerophospholipids (GP)	Glycerophosphocholines	Phosphatidylcholines (PC)	rs174546	chr11:61569830	T / C	0.1208	0.012	1.045e-23	FADS1	FADS1-FADS2-FADS3
744.554	PC(33:2)_[M+H]1+ / PE(36:2)_[M+H]1+ / PA(38:3)_[M+NH4]1+	Glycerophospholipids (GP)	Glycerophosphocholines	Phosphatidylcholines (PC)	rs174546	chr11:61569830	T / C	0.0752	0.0065	4.454e-31	FADS1	FADS1-FADS2-FADS3
745.575	PA(39:1)_[M+H]1+	Glycerophospholipids (GP)	Glycerophosphates	Phosphatidates (PA)	rs174546	chr11:61569830	T / C	0.0684	0.0062	1.052e-28	FADS1	FADS1-FADS2-FADS3
749.534	PG(34:0)_[M-H]1-	Glycerophospholipids (GP)	Glycerophosphoglycerols	Phosphatidylglycerols (PG)	rs174546	chr11:61569830	T / C	-0.0707	0.0077	6.041e-20	FADS1	FADS1-FADS2-FADS3
750.544	PE-O(38:6)_[M+H]1+ / PC-P(35:5)_[M+H]1+	Glycerophospholipids (GP)	Glycerophosphoethanolamines	Phosphatidylethanolamines (PE)	rs174546	chr11:61569830	T / C	-0.0824	0.0085	3.376e-22	FADS1	FADS1-FADS2-FADS3
752.559	PE-O(38:4)_[M-H]1- / PC-O(35:4)_[M-H]1- / PC-P(35:3)_[M-H]1-	Glycerophospholipids (GP)	Glycerophosphoethanolamines	Phosphatidylethanolamines (PE)	rs174546	chr11:61569830	T / C	-0.1061	0.0092	1.765e-30	FADS1	FADS1-FADS2-FADS3
757.502	PG(35:3)_[M-H]1-	Glycerophospholipids (GP)	Glycerophosphoglycerols	Phosphatidylglycerols (PG)	rs174546	chr11:61569830	T / C	0.0546	0.0081	1.761e-11	FADS1	FADS1-FADS2-FADS3
758.57	PC(34:2)_[M+H]1+ / PE(37:2)_[M+H]1+ / PA(39:3)_[M+NH4]1+	Glycerophospholipids (GP)	Glycerophosphocholines	Phosphatidylcholines (PC)	rs174546	chr11:61569830	T / C	0.0413	0.0045	2.057e-20	FADS1	FADS1-FADS2-FADS3
764.524	PE(38:5)_[M-H]1-	Glycerophospholipids (GP)	Glycerophosphoethanolamines	Phosphatidylethanolamines (PE)	rs174546	chr11:61569830	T / C	-0.099	0.0097	2.452e-24	FADS1	FADS1-FADS2-FADS3
766.574	PC-O(36:5)_[M+H]1+ / PC-P(36:4)_[M+H]1+	Glycerophospholipids (GP)	Glycerophosphocholines	Phosphatidylcholines (PC)	rs174546	chr11:61569830	T / C	-0.1255	0.0068	4.377e-77	FADS1	FADS1-FADS2-FADS3
768.554	PC(35:4)_[M+H]1+ / PE(38:4)_[M+H]1+ / PA(40:5)_[M+NH4]1+	Glycerophospholipids (GP)	Glycerophosphocholines	Phosphatidylcholines (PC)	rs174546	chr11:61569830	T / C	-0.1	0.0071	6.434e-45	FADS1	FADS1-FADS2-FADS3
768.591	PC-O(36:4)_[M+H]1+ / PC-P(36:3)_[M+H]1+	Glycerophospholipids (GP)	Glycerophosphocholines	Phosphatidylcholines (PC)	rs174546	chr11:61569830	T / C	-0.0755	0.0068	2.665e-28	FADS1	FADS1-FADS2-FADS3
770.57	PC(35:3)_[M+H]1+ / PE(38:3)_[M+H]1+ / PA(40:4)_[M+NH4]1+	Glycerophospholipids (GP)	Glycerophosphocholines	Phosphatidylcholines (PC)	rs174546	chr11:61569830	T / C	0.0708	0.0078	7.653e-20	FADS1	FADS1-FADS2-FADS3
770.606	PC-O(36:3)_M+H]1+ / PC-P(36:2)_M+H]1+	Glycerophospholipids (GP)	Glycerophosphocholines	Phosphatidylcholines (PC)	rs174546	chr11:61569830	T / C	0.0855	0.0077	6.94e-29	FADS1	FADS1-FADS2-FADS3
771.59	PA(41:2)_[M+H]1+	Glycerophospholipids (GP)	Glycerophosphates	Phosphatidates (PA)	rs174546	chr11:61569830	T / C	0.0875	0.0107	2.299e-16	FADS1	FADS1-FADS2-FADS3
777.565	PG(36:0)_[M-H]1-	Glycerophospholipids (GP)	Glycerophosphoglycerols	Phosphatidylglycerols (PG)	rs174546	chr11:61569830	T / C	-0.0569	0.0064	5.892e-19	FADS1	FADS1-FADS2-FADS3
782.57	PC(36:4)_[M+H]1+ / PE(39:4)_[M+H]1+ / PA(41:5)_[M+NH4]1+	Glycerophospholipids (GP)	Glycerophosphocholines	Phosphatidylcholines (PC)	rs174546	chr11:61569830	T / C	-0.1253	0.0052	4.84e-130	FADS1	FADS1-FADS2-FADS3
784.586	PC(36:3)_[M+H]1+ / PE(39:3)_[M+H]1+ / PA(41:4)_[M+NH4]1+	Glycerophospholipids (GP)	Glycerophosphocholines	Phosphatidylcholines (PC)	rs174546	chr11:61569830	T / C	0.0697	0.0042	9.964e-62	FADS1	FADS1-FADS2-FADS3
786.601	PC(36:2)_[M+H]1+ / PE(39:2)_[M+H]1+ / PA(41:3)_[M+NH4]1+	Glycerophospholipids (GP)	Glycerophosphocholines	Phosphatidylcholines (PC)	rs174546	chr11:61569830	T / C	0.0311	0.0043	8.691e-13	FADS1	FADS1-FADS2-FADS3
793.575	PA(43:4)_[M-H]1-	Glycerophospholipids (GP)	Glycerophosphates	Phosphatidates (PA)	rs174546	chr11:61569830	T / C	-0.0904	0.0075	4.33e-33	FADS1	FADS1-FADS2-FADS3
794.606	PC-O(38:5)_[M+H]1+ / PC-P(38:4)_[M+H]1+	Glycerophospholipids (GP)	Glycerophosphocholines	Phosphatidylcholines (PC)	rs174546	chr11:61569830	T / C	-0.0915	0.0066	2.612e-43	FADS1	FADS1-FADS2-FADS3
796.586	PC(37:4)_[M+H]1+ / PE(40:4)_[M+H]1+ / PA(42:5)_[M+NH4]1+	Glycerophospholipids (GP)	Glycerophosphocholines	Phosphatidylcholines (PC)	rs174546	chr11:61569830	T / C	-0.1526	0.0097	3.3e-56	FADS1	FADS1-FADS2-FADS3
796.622	PC-O(38:4)_[M+H]1+ / PC-P(38:3)_[M+H]1+	Glycerophospholipids (GP)	Glycerophosphocholines	Phosphatidylcholines (PC)	rs174546	chr11:61569830	T / C	-0.0511	0.008	1.501e-10	FADS1	FADS1-FADS2-FADS3
798.601	PC(37:4)_[M+H]1+ / PE(40:3)_[M+H]1+	Glycerophospholipids (GP)	Glycerophosphocholines	Phosphatidylcholines (PC)	rs174546	chr11:61569830	T / C	0.0644	0.0083	8.661e-15	FADS1	FADS1-FADS2-FADS3
806.569	PC(38:6)_[M+H]1+ / PE(41:6)_[M+H]1+	Glycerophospholipids (GP)	Glycerophosphocholines	Phosphatidylcholines (PC)	rs174546	chr11:61569830	T / C	-0.0519	0.0069	6.781e-14	FADS1	FADS1-FADS2-FADS3
808.585	PC(38:5)_[M+H]1+ / PE(41:5)_[M+H]1+ / PA(43:6)_[M+NH4]1+	Glycerophospholipids (GP)	Glycerophosphocholines	Phosphatidylcholines (PC)	rs174546	chr11:61569830	T / C	-0.0821	0.0056	4.121e-48	FADS1	FADS1-FADS2-FADS3
809.534	PA(40:5)_[M+OAc]1- / PG(39:5)_[M-H]1-	Glycerophospholipids (GP)	Glycerophosphates	Phosphatidates (PA)	rs174546	chr11:61569830	T / C	-0.0842	0.0135	4.743e-10	FADS1	FADS1-FADS2-FADS3
809.555	PI-O(33:0)_[M-H]1-	Glycerophospholipids (GP)	Glycerophosphoinositols	Phosphatidylinositols (PI)	rs174546	chr11:61569830	T / C	-0.1654	0.0227	3.121e-13	FADS1	FADS1-FADS2-FADS3
810.601	PC(38:4)_[M+H]1+ / PE(41:4)_[M+H]1+	Glycerophospholipids (GP)	Glycerophosphocholines	Phosphatidylcholines (PC)	rs174546	chr11:61569830	T / C	-0.1477	0.0065	7.2e-115	FADS1	FADS1-FADS2-FADS3
812.617	PC(38:3)_[M+H]1+ / PE(41:3)_[M+H]1+ / PA(43:4)_[M+NH4]1+	Glycerophospholipids (GP)	Glycerophosphocholines	Phosphatidylcholines (PC)	rs174546	chr11:61569830	T / C	0.0587	0.0066	5.354e-19	FADS1	FADS1-FADS2-FADS3
817.575	PA(45:6)_[M-H]1-	Glycerophospholipids (GP)	Glycerophosphates	Phosphatidates (PA)	rs174546	chr11:61569830	T / C	0.0477	0.0068	1.79e-12	FADS1	FADS1-FADS2-FADS3
820.621	PC-O(40:6)_[M+H]1+ / PC-P(40:5)_[M+H]1+	Glycerophospholipids (GP)	Glycerophosphocholines	Phosphatidylcholines (PC)	rs174546	chr11:61569830	T / C	-0.0602	0.007	7.091e-18	FADS1	FADS1-FADS2-FADS3
822.637	PC-O(40:5)_[M+H]1+ / PC-P(40:4)_[M+H]1+	Glycerophospholipids (GP)	Glycerophosphocholines	Phosphatidylcholines (PC)	rs174546	chr11:61569830	T / C	-0.0786	0.0074	2.509e-26	FADS1	FADS1-FADS2-FADS3
825.592	SM(44:9)_[M+H]1-	Sphingolipids (SP)	Phosphosphingolipids	Sphingomyelins (SM)	rs174546	chr11:61569830	T / C	-0.1509	0.0083	1.057e-74	FADS1	FADS1-FADS2-FADS3
830.569	PC(40:8)_[M+H]1+	Glycerophospholipids (GP)	Glycerophosphocholines	Phosphatidylcholines (PC)	rs174546	chr11:61569830	T / C	-0.1096	0.0097	7.664e-30	FADS1	FADS1-FADS2-FADS3
832.535	PS(35:2) _[M+OAc]1-	Glycerophospholipids (GP)	Glycerophosphoserines	Phosphatidylserines (PS)	rs174546	chr11:61569830	T / C	-0.1469	0.0219	2.096e-11	FADS1	FADS1-FADS2-FADS3
833.519	PI(34:2)_[M-H]1-	Glycerophospholipids (GP)	Glycerophosphoinositols	Phosphatidylinositols (PI)	rs174546	chr11:61569830	T / C	0.0606	0.0089	7.894e-12	FADS1	FADS1-FADS2-FADS3
834.601	PC(40:6)_[M+H]1+ / PE(43:6)_[M+H]1+	Glycerophospholipids (GP)	Glycerophosphocholines	Phosphatidylcholines (PC)	rs174546	chr11:61569830	T / C	-0.0759	0.0083	8.662e-20	FADS1	FADS1-FADS2-FADS3
836.616	PC(40:5)_[M+H]1+	Glycerophospholipids (GP)	Glycerophosphocholines	Phosphatidylcholines (PC)	rs174546	chr11:61569830	T / C	-0.1079	0.0075	2.145e-47	FADS1	FADS1-FADS2-FADS3
838.56	PC(36:5)_[M+OAc]1- / PS(40:4)_[M-H]1-	Glycerophospholipids (GP)	Glycerophosphocholines	Phosphatidylcholines (PC)	rs174546	chr11:61569830	T / C	-0.1494	0.0131	5.987e-30	FADS1	FADS1-FADS2-FADS3
842.592	PC(36:3)_[M+OAc]1- / PS(40:2)_[M-H]1-	Glycerophospholipids (GP)	Glycerophosphocholines	Phosphatidylcholines (PC)	rs174546	chr11:61569830	T / C	0.0803	0.0065	3.149e-35	FADS1	FADS1-FADS2-FADS3
[truncated: 6,888 more rows]

## Sheet: S5
Table S5. Summary of significant associations between lipid metabolites and genetic variants from conditional analyses of univariate genome-wide association study results in PROMIS
[truncated: 2,936 more rows]

[truncated: 13 more sheets: S6, S7, S8, S9, S10, S11, S12, S13, S14, S15, S16, S17, S18]
